# Supplementary material for: Effect of the gut microbiome, skin microbiome, plasma metabolome, white blood cells subtype, immune cells, inflammatory proteins, and inflammatory cytokines on asthma: a two-sample Mendelian randomized study and mediation analysis
Source: Front Immunol. 2025 Mar 21;16:1436888. doi: 10.3389/fimmu.2025.1436888 (PMC11968350; doi:10.3389/fimmu.2025.1436888)
Supplement: Supplementary file 2 [file DataSheet1.xlsx]

## Sheet: Table S1
Table S1 GWAS information
Trait category	GWAS ID	Trait name	Trait number	Trait type	Sample size (cases/controls)	Ethnicity	PMID
Exposure	GCST90027446-GCST90027857	Gut microbiome	412	Continuous	7738	European	35115690
Exposure	GCST90133164-GCST90133313	Skin microbiome	150(The data were divided into two groups, with 296 valid data)	Continuous	597	European	36261456
Outcome	finngen_R9_J10_ASTHMA_EXMORE	Asthma	/	Continuous	244562(42163,202399)	European	/
Mediator	GCST90199621~GCST90201020	Plasma metabolites	1400	Continuous	8299	European	36635386
Mediator	ieu-b-29;ieu-b-30;ieu-b-31;ieu-b-32;ieu-b-33;ieu-b-34	WBC subtype	5	Continuous	746667	European	32888494
Mediator	GCST90001391-GCST90002121	Immune cells	731	Continuous	3669	European	32929287
Mediator	GCST90274758~GCST90274848	circulating inflammatory proteins	91	Continuous	14744	European	37563310
Mediator	GCST004420-GCST004460	Cytokines	41	Continuous	8293	European	27989323

## Sheet: Table S2
Table S2 STROBE-MR checklist of recommended items to address in reports of Mendelian randomization studies
Item No.	Section	Checklist item	Page No.	Relevant text from manuscript
1	TITLE and ABSTRACT	Indicate Mendelian randomization (MR) as the study’s design in the title and/or the abstract if that is a main purpose of the study	Page 1	Effect of the gut microbiome, skin microbiome, plasma metabolome, white blood cells subtype, immune cells, inflammatory proteins, and inflammatory cytokines on asthma: a two-sample Mendelian randomized study and mediation analysis
	INTRODUCTION
2	Background	Explain the scientific background and rationale for the reported study. What is the exposure? Is a potential causal relationship between exposure and outcome plausible? Justify why MR is a helpful method to address the study question	Page 4-6	Asthma is a serious global health problem affecting all age groups.The mechanisms underlying the link between gut microbiota and asthma involve the complex metabolic and immune interactions of microbes, metabolites, and host immune responses. Although the mechanistic role of skin dysbiosis in asthma pathogenesis remains uncertain, changes in the environment initiate dysbiosis in the skin along wi…
3	Objectives	State specific objectives clearly, including pre-specified causal hypotheses (if any). State that MR is a method that, under specific assumptions, intends to estimate causal effects	Page 6	We conducted a MR study based on recently published summary datasets of large genome-wide association studies (GWASs) to evaluate the causal relationship among gut microbiota, skin microbiota, plasma metabolites, circulating white blood cells (WBC), immune cells, circulating inflammatory proteins, inflammatory cytokines, and asthma and identify pathways from the gut or skin microbiota to asthma m…
	METHODS
4	Study design and data sources	Present key elements of the study design early in the article. Consider including a table listing sources of data for all phases of the study. For each data source contributing to the analysis, describe the following:	Page 7, Figure 1	Study design presented in Figure 1.
	a)	Setting: Describe the study design and the underlying population, if possible. Describe the setting, locations, and relevant dates, including periods of recruitment, exposure, follow-up, and data collection, when available.	Page 7-10, Table S1, Figure 1	Study design presented in Figure 1. Table S1 reports information such as underlying population.
	b)	Participants: Give the eligibility criteria, and the sources and methods of selection of participants. Report the sample size, and whether any power or sample size calculations were carried out prior to the main analysis	Table S1	Table S1 reports information such as sample size.
	c)	Describe measurement, quality control and selection of genetic variants	Page 11	We followed three core assumptions to identify the IVs we needed: 1)The genome-wide significance threshold of P < 5 × 10-8 is used as a potential tool variable related to each exposure trait. When there were too few whole-genome significance loci in the original GWAS results[35; 36], we used a relatively loose p value of 1 × 10−5 to select SNPs associated with gut microbiota, plasma metabolomics …
	d)	For each exposure, outcome, and other relevant variables, describe methods of assessment and diagnostic criteria for diseases	Page 8-11, Table S1, Figure 1	2.2.1 Gut microbiota GWAS data source We used the GWAS dataset that included 7,738 Dutch Microbiome Project (DMP) participants whose microbiota data were quality-controlled with LifeLines[26]. Included in the subsequent analysis were 207 taxa (5 phyla, 10 classes, 13 orders, 26 families, 48 genera, and 105 species) and 205 pathways representing microbial composition and function. 2.2.2 Skin micro…
	e)	Provide details of ethics committee approval and participant informed consent, if relevant	Page 27	All analyses were based on publicly available summary statistics, which do not require ethical approval and consent.
5	Assumptions	Explicitly state the three core IV assumptions for the main analysis (relevance, independence and exclusion restriction) as well assumptions for any additional or sensitivity analysis	Page 10-11	assumption 1, genetic instruments are associated with exposure; assumption 2, genetic instruments are not associated with confounders; assumption 3, genetic instruments are not associated with outcome, and genetic instruments act on outcome only through exposure.
6	Statistical methods: main analysis	Describe statistical methods and statistics used
	a)	Describe how quantitative variables were handled in the analyses (i.e., scale, units, model)	Page 8-10	We used the GWAS dataset that included 7,738 Dutch Microbiome Project (DMP) participants whose microbiota data were quality-controlled with LifeLines.Data on skin microbiota in this study were obtained from two cross-sectional, population-based German cohorts, KORA FF4 (Individuals = 324) and PopGen (Individuals = 273) participants, with a total of 1656 skin samples. Summary statistics of plasma …
	b)	Describe how genetic variants were handled in the analyses and, if applicable, how their weights were selected	Page 11	The genome-wide significance threshold of P < 5 × 10-8 is used as a potential tool variable related to each exposure trait. When there were too few whole-genome significance loci in the original GWAS results, we used a relatively loose p value of 1 × 10−5 to select SNPs associated with gut microbiota, plasma metabolomics and p value of 5 × 10−5 to select SNPs associated with skin microbiota as ca…
	c)	Describe the MR estimator (e.g. two-stage least squares, Wald ratio) and related statistics. Detail the included covariates and, in case of two-sample MR, whether the same covariate set was used for adjustment in the two samples	Page 12	Various methods were employed to estimate MR effects, ensuring robustness. The Inverse Variance Weighting (IVW) method served as the primary approach, supplemented by MR-Egger, weighted mode, and Weighted Median methods, each tailored to different assumptions of instrument validity.
	d)	Explain how missing data were addressed	Not mentioned
	e)	If applicable, indicate how multiple testing was addressed		-
7	Assessment of assumptions	Describe any methods or prior knowledge used to assess the assumptions or justify their validity	Page 11	4) The MR-Egger and MR pleiotropy residual sum and outlier (MR-PRESSO) were used to assess the horizontal pleiotropy. The MR-PRESSO test was applied to detect horizontal pleiotropy, and the pleiotropy effect was eliminated by removing the outliers[37]. 5) The strength of the selected SNPs was assessed using F-statistic, and variants with an F statistic <10 were excluded from the analysis to avoid…
8	Sensitivity analyses and additional analyses	Describe any sensitivity analyses or additional analyses performed (e.g. comparison of effect estimates from different approaches, independent replication, bias analytic techniques, validation of instruments, simulations)	Page 11-12	4) The MR-Egger and MR pleiotropy residual sum and outlier (MR-PRESSO) were used to assess the horizontal pleiotropy. The MR-PRESSO test was applied to detect horizontal pleiotropy, and the pleiotropy effect was eliminated by removing the outliers[37]. 5) The strength of the selected SNPs was assessed using F-statistic, and variants with an F statistic <10 were excluded from the analysis to avoid…
9	Software and pre-registration
	a)	Name statistical software and package(s), including version and settings used	Page 13	All analyses were performed using the TwoSampleMR (version 0.6.0), MendelianRandomization (version 0.8.0),and MRPRESSO package (1.0) in R Software 4.3.3 (https://www.R-project.org).
	b)	State whether the study protocol and details were pre-registered (as well as when and where)	Not mentioned
	RESULTS
10	Descriptive data
	a)	Report the numbers of individuals at each stage of included studies and reasons for exclusion. Consider use of a flow diagram	Figure 1, Table S1	The numbers of individuals included study is already provided in the Figure 1 and Table S1
	b)	Report summary statistics for phenotypic exposure(s), outcome(s), and other relevant variables (e.g. means, SDs, proportions)	Figure 1, Table S1	The summary statistics for phenotypic exposure(s), outcome(s), and other relevant variables included study is already provided in the Figure 1 and Table S1
	c)	If the data sources include meta-analyses of previous studies, provide the assessments of heterogeneity across these studies	Not mentioned
	d)	For two-sample MR:	Page 8-10	These GWAS sample populations needed to be predominantly of European descent and largely independent of each other.
		i. Provide justification of the similarity of the genetic variant-exposure associations between the exposure and outcome samples
		ii. Provide information on the number of individuals who overlap between the exposure and outcome studies
11	Main results
	a)	Report the associations between genetic variant and exposure, and between genetic variant and outcome, preferably on an interpretable scale	Table S5,9,14, 18, 14,30	Table S5,9,14, 18, 14,30
	b)	Report MR estimates of the relationship between exposure and outcome, and the measures of uncertainty from the MR analysis, on an interpretable scale, such as odds ratio or relative risk per SD difference	Table S5,9,14, 18, 14,30	Table S5,9,14, 18, 14,30
	c)	If relevant, consider translating estimates of relative risk into absolute risk for a meaningful time period	Not mentioned
	d)	Consider plots to visualize results (e.g. forest plot, scatterplot of associations between genetic variants and outcome versus between genetic variants and exposure)	Figure 2, 3, 4,5,6,7; Figure S1	Figure 2, 3, 4,5,6,7; Figure S1
12	Assessment of assumptions
	a)	Report the assessment of the validity of the assumptions	Table S3-S19; Table S21-S24;Table S26-S31	Table S3-S19; Table S21-S24;Table S26-S31 reported the F-statistics for SNP, Q-statistics for assessment of heterogeneity, pleiotropy and leave-one-out sensitivity analysis.
	b)	Report any additional statistics (e.g., assessments of heterogeneity across genetic variants, such as I2, Q statistic or E-value)	Table S6,10,11,15, 19,26,31	Table S6,10,15, 19,26,31 reported the MR steiger directionality;Table 11 reported the I2
13	Sensitivity analyses and additional analyses
	a)	Report any sensitivity analyses to assess the robustness of the main results to violations of the assumptions	Table S3-S19; Table S21-S24;Table S26-S31	Table S3-S19; Table S21-S24;Table S26-S31 reported the F-statistics for SNP, Q-statistics for assessment of heterogeneity, pleiotropy, leave-one-out sensitivity analysis, and multiple MR methods.
	b)	Report results from other sensitivity analyses or additional analyses	Table S6,10,15, 19,26,31	Table S6,10,15, 19,26,31 reported the Steiger tests and MR-PRESSO analysis.
	c)	Report any assessment of direction of causal relationship (e.g., bidirectional MR)	Table S7-10	We conducted a reverse MR analysis of asthma on gut microbiota.
	d)	When relevant, report and compare with estimates from non-MR analyses	Page 21-25	See discussion section for detailed information.
	e)	Consider additional plots to visualize results (e.g., leave-one-out analyses)	Figure S1	Figure S1
	DISCUSSION
14	Key results	Summarize key results with reference to study objectives	Page 21-26	In this study, we first assessed the causal relationship among gut microbiota, skin microbiota, plasma metabolome, WBC subtype counts, immune cell traits, circulating inflammatory proteins, inflammatory cytokines, and asthma by using MR analysis. We found potential causal associations among 31 gut bacterial features (abundances of 19 bacterial pathways and 12 microbiota), 10 skin bacterial featur…
15	Limitations	Discuss limitations of the study, taking into account the validity of the IV assumptions, other sources of potential bias, and imprecision. Discuss both direction and magnitude of any potential bias and any efforts to address them	Page 26	This study has certain limitations. First, under the currently set screening conditions, we obtained few SNPs for some immune cells. This situation may have led to a bias in the results. Second, given that our population data originated from individuals of European ancestry, the generalizability of our research results to other populations is limited. Third, asthma type analysis will provide a cl…
16	Interpretation
	a)	Meaning: Give a cautious overall interpretation of results in the context of their limitations and in comparison with other studies	Page 21-25	See discussion section for detailed information.
	b)	Mechanism: Discuss underlying biological mechanisms that could drive a potential causal relationship between the investigated exposure and the outcome, and whether the gene-environment equivalence assumption is reasonable. Use causal language carefully, clarifying that IV estimates may provide causal effects only under certain assumptions	Page 21-25	See discussion section for detailed information.
	c)	Clinical relevance: Discuss whether the results have clinical or public policy relevance, and to what extent they inform effect sizes of possible interventions	Page 21-25	See discussion section for detailed information.
17	Generalizability	Discuss the generalizability of the study results (a) to other populations, (b) across other exposure periods/timings, and (c) across other levels of exposure	Page 25	Second, given that our population data originated from individuals of European ancestry, the generalizability of our research results to other populations is limited.
	OTHER INFORMATION
18	Funding	Describe sources of funding and the role of funders in the present study and, if applicable, sources of funding for the databases and original study or studies on which the present study is based	Page 27	General program of National Natural Science Foundation of China (No. 82174243), High level Key Discipline of National Administration of Traditional Chinese Medicine-Traditional Chinese constitutional medicine (No. zyyzdxk-2023251), the Fundamental Research Funds for the Central Universities (No.2023-JYB-JBZD-009).
19	Data and data sharing	Provide the data used to perform all analyses or report where and how the data can be accessed, and reference these sources in the article. Provide the statistical code needed to reproduce the results in the article, or report whether the code is publicly accessible and if so, where	Page 27	The datasets supporting the conclusions of this article are available in IEU open gwas project repository (https://gwas.mrcieu.ac.uk/).
20	Conflicts of Interest	All authors should declare all potential conflicts of interest	Page 27	The authors declare that the research was conducted in the absence of any commercial or financial relationships that could be construed as a potential conflict of interest.

## Sheet: Table S3
Table S3 Data used in the MR Analysis to assess the causal role of gut microbiota to asthma
SNP	effect_allele.exposure	other_allele.exposure	effect_allele.outcome	other_allele.outcome	beta.exposure	beta.outcome	eaf.exposure	eaf.outcome	pos.outcome	pval.outcome	se.outcome	samplesize.outcome	id.exposure	chr.exposure	pos.exposure	se.exposure	pval.exposure	samplesize.exposure	rsq.exposure	effective_n.exposure	rsq.outcome	effective_n.outcome	steiger_dir	steiger_pval	R2	F	FMean	F_pow_beta_se
rs11826488	A	G	A	G	0.153784	-0.0151943	0.0763678	0.08998	133199427	0.303587	0.0147694	244562	GCST90027446	11	133069322	0.0345929	8.77e-06	7738	0.00254814	7738	4.32764e-06	244562	TRUE	2.73376e-05	0.00333627	25.8958	42.2042	19.7628
rs17194003	G	A	G	A	-0.102927	-0.00935756	0.201727	0.2311	106003734	0.375306	0.0105547	244562	GCST90027446	3	105722581	0.021032	9.89e-07	7738	0.0030863	7738	3.21401e-06	244562	TRUE	3.15909e-06	0.00341196	26.4853	42.2042	23.9496
rs62335789	C	G	C	G	-0.0977054	0.0213673	0.168684	0.1738	180950371	0.0555098	0.0111586	244562	GCST90027446	4	181871524	0.021882	8e-06	7738	0.00257057	7738	1.49928e-05	244562	TRUE	4.9353e-05	0.00267736	20.7677	42.2042	19.9372
rs9947104	G	A	G	A	-0.0795727	0.0110795	0.303897	0.3027	59267126	0.236133	0.00935209	244562	GCST90027446	18	56934358	0.017523	5.6e-06	7738	0.00265851	7738	5.73898e-06	244562	TRUE	2.0335e-05	0.00267891	20.7797	42.2042	20.6211
rs9990334	A	G	A	G	0.0741908	0.00102473	0.424436	0.3916	63512870	0.898948	0.00806935	244562	GCST90027446	3	63498546	0.0167253	9.17e-06	7738	0.00253707	7738	6.59411e-08	244562	TRUE	1.40583e-05	0.00268928	20.8604	42.2042	19.6767
rs12647170	G	A	G	A	0.188783	0.00264836	0.0765661	0.1155	24503147	0.837827	0.0129394	244562	GCST90027447	4	24504770	0.0373683	4.37e-07	7738	0.00328831	7738	1.71293e-07	244562	TRUE	8.01425e-07	0.00503962	39.184	42.2042	25.5223
rs12704084	G	C	G	C	-0.0736196	0.00361743	0.599698	0.5992	149217958	0.659188	0.00820215	244562	GCST90027447	7	148915050	0.0166029	9.24e-06	7738	0.00253513	7738	7.95352e-07	244562	TRUE	1.81684e-05	0.00260218	20.183	42.2042	19.6616
rs35731059	A	C	A	C	0.129356	-0.000551772	0.104757	0.1135	96472841	0.968577	0.0140068	244562	GCST90027447	11	96206005	0.0262545	8.35e-07	7738	0.00312816	7738	6.34533e-09	244562	TRUE	1.29094e-06	0.00313854	24.3562	42.2042	24.2754
rs4878062	G	A	G	A	0.0760825	-0.00303877	0.402286	0.41	87344749	0.693943	0.00772222	244562	GCST90027447	9	89959664	0.0164219	3.6e-06	7738	0.00276696	7738	6.33177e-07	244562	TRUE	7.11853e-06	0.00278374	21.5951	42.2042	21.4646
rs58235446	T	C	T	C	-0.153253	-0.0271616	0.0638651	0.05112	91088257	0.161395	0.0193957	244562	GCST90027447	9	93850539	0.033084	3.62e-06	7738	0.00276607	7738	8.01885e-06	244562	TRUE	1.61e-05	0.00280834	21.7865	42.2042	21.4576
rs605262	A	G	A	G	-0.0757354	-0.00615346	0.676757	0.6697	87256479	0.432993	0.007848	244562	GCST90027447	11	86967521	0.0170586	9.01e-06	7738	0.0025415	7738	2.51382e-06	244562	TRUE	2.31925e-05	0.00250951	19.4624	42.2042	19.7111
rs62271914	A	G	A	G	-0.0740607	0.0166462	0.42331	0.4039	135305046	0.0301717	0.00767874	244562	GCST90027447	3	135023888	0.0162991	5.52e-06	7738	0.00266179	7738	1.92157e-05	244562	TRUE	4.28033e-05	0.00267798	20.7724	42.2042	20.6466
rs7041639	G	A	G	A	-0.157604	-0.0101086	0.0875309	0.08078	27341340	0.495547	0.0148326	244562	GCST90027447	9	27341338	0.0341699	3.98e-06	7738	0.00274245	7738	1.89916e-06	244562	TRUE	9.89723e-06	0.00396775	30.8168	42.2042	21.2739
rs72666075	C	T	C	T	-0.151693	0.0111587	0.0593823	0.04397	28559936	0.511745	0.017007	244562	GCST90027447	14	29029142	0.0337842	7.12e-06	7738	0.0025993	7738	1.76029e-06	244562	TRUE	1.68042e-05	0.00257058	19.9373	42.2042	20.1606
rs8101993	C	T	C	T	-0.100985	-0.00747243	0.180021	0.2076	30112626	0.466131	0.0102532	244562	GCST90027447	19	30603533	0.0223014	5.95e-06	7738	0.00264353	7738	2.17178e-06	244562	TRUE	1.50214e-05	0.00301071	23.3612	42.2042	20.5045
rs62523849	C	T	C	T	0.406572	0.0286398	0.0675415	0.06442	87469548	0.061776	0.0153326	244562	GCST90027448	8	88481776	0.0900147	6.28e-06	7738	0.00263019	7738	1.42664e-05	244562	TRUE	3.82753e-05	0.0208212	164.498	42.2042	20.4008
rs2504016	G	A	G	A	-0.23666	-0.0183839	0.0734254	0.07566	32899506	0.185151	0.013874	244562	GCST90027449	10	33188434	0.0514871	4.3e-06	7738	0.00272365	7738	7.17932e-06	244562	TRUE	1.77775e-05	0.0076209	59.408	42.2042	21.1277
rs2942201	A	C	A	C	0.120592	-0.00696236	0.438055	0.4182	23561663	0.377667	0.00789202	244562	GCST90027449	8	23419176	0.0258595	3.11e-06	7738	0.00280325	7738	3.18237e-06	244562	TRUE	9.23307e-06	0.00715961	55.7862	42.2042	21.7469
rs4878453	G	A	G	A	0.242077	0.00425217	0.0733257	0.04192	27435735	0.792222	0.0161418	244562	GCST90027449	9	27435733	0.050584	1.7e-06	7738	0.00295176	7738	2.83748e-07	244562	TRUE	3.11692e-06	0.0079638	62.1025	42.2042	22.9024
rs61074222	C	G	C	G	-0.210428	-0.0171275	0.0941941	0.08282	67569291	0.15073	0.0119193	244562	GCST90027449	13	68143423	0.0447813	2.61e-06	7738	0.00284616	7738	8.44304e-06	244562	TRUE	1.22933e-05	0.00755607	58.8988	42.2042	22.0807
rs6993022	C	T	C	T	0.119426	0.00842773	0.3798	0.407	143965940	0.283738	0.00786198	244562	GCST90027449	8	145040108	0.0261095	4.78e-06	7738	0.00269719	7738	4.69861e-06	244562	TRUE	1.60787e-05	0.00671915	52.331	42.2042	20.9219
rs7576386	A	G	A	G	-0.138428	0.0122572	0.7686	0.7311	154271862	0.19541	0.00946692	244562	GCST90027449	2	155128375	0.0301616	4.44e-06	7738	0.00271545	7738	6.85451e-06	244562	TRUE	1.78996e-05	0.00681619	53.0919	42.2042	21.0639
rs7923287	T	A	T	A	0.139505	-0.00279557	0.723875	0.728	84081676	0.746703	0.00865529	244562	GCST90027449	10	85841432	0.0290043	1.51e-06	7738	0.00298155	7738	4.26572e-07	244562	TRUE	2.92123e-06	0.00777999	60.6579	42.2042	23.1342
rs9344056	A	G	A	G	-0.17033	-0.0117039	0.162359	0.1503	80857851	0.19031	0.00893658	244562	GCST90027449	6	81567568	0.0349944	1.13e-06	7738	0.0030531	7738	7.01343e-06	244562	TRUE	5.11323e-06	0.00789126	61.5324	42.2042	23.6911
rs10873850	G	A	G	A	0.0858857	0.00896249	0.2783	0.2771	87488859	0.249742	0.00778686	244562	GCST90027450	1	87954542	0.0185528	3.67e-06	7738	0.00276252	7738	5.41683e-06	244562	TRUE	1.33789e-05	0.00296307	22.9904	42.2042	21.43
rs1093520	G	T	G	T	0.153028	-0.00902857	0.915857	0.8834	98530106	0.479189	0.0127593	244562	GCST90027450	7	98159418	0.0333575	4.49e-06	7738	0.00271305	7738	2.04738e-06	244562	TRUE	1.13139e-05	0.00360925	28.0223	42.2042	21.0453
rs12656915	G	T	G	T	0.13461	-0.0223605	0.0791242	0.06953	159896670	0.162507	0.0160096	244562	GCST90027450	5	159323677	0.0302054	8.33e-06	7738	0.00256068	7738	7.97647e-06	244562	TRUE	3.45903e-05	0.00264055	20.4814	42.2042	19.8603
rs12707570	C	A	C	A	-0.0728993	0.000318646	0.512255	0.5327	83207982	0.966937	0.00768744	244562	GCST90027450	7	82837298	0.0162424	7.18e-06	7738	0.00259717	7738	7.02535e-09	244562	TRUE	1.03651e-05	0.00265556	20.5981	42.2042	20.144
rs136110	C	T	C	T	0.0964705	0.00240433	0.208243	0.2495	46973764	0.780423	0.00862485	244562	GCST90027450	22	47369660	0.0202552	1.91e-06	7738	0.00292367	7738	3.1776e-07	244562	TRUE	3.52186e-06	0.00306889	23.814	42.2042	22.6838
rs3797252	C	T	C	T	-0.0794419	-0.00736541	0.307103	0.3037	54204784	0.372399	0.00825729	244562	GCST90027450	5	53500614	0.0174202	5.11e-06	7738	0.00268108	7738	3.25336e-06	244562	TRUE	1.48165e-05	0.00268585	20.8337	42.2042	20.7966
rs38127	C	T	C	T	0.0760269	-0.00209752	0.645907	0.6452	78640059	0.804534	0.00847539	244562	GCST90027450	7	78269375	0.0168296	6.26e-06	7738	0.00263103	7738	2.50442e-07	244562	TRUE	1.07214e-05	0.00264394	20.5078	42.2042	20.4074
rs61915762	A	G	A	G	0.0827921	-0.00058127	0.275511	0.2566	130572766	0.947678	0.00885772	244562	GCST90027450	11	130442661	0.0180027	4.25e-06	7738	0.00272647	7738	1.76087e-08	244562	TRUE	6.36218e-06	0.00273639	21.2268	42.2042	21.1496
rs62018962	A	C	A	C	-0.148269	-0.0269744	0.0988924	0.08793	95436288	0.0490027	0.0137025	244562	GCST90027450	15	95979517	0.0312705	2.12e-06	7738	0.00289771	7738	1.58456e-05	244562	TRUE	1.55323e-05	0.00391805	30.4293	42.2042	22.4818
rs6782393	C	A	C	A	-0.151342	0.00673885	0.0605063	0.05112	59927207	0.60945	0.0131912	244562	GCST90027450	3	59912933	0.033707	7.12e-06	7738	0.00259915	7738	1.06713e-06	244562	TRUE	1.49848e-05	0.00260401	20.1973	42.2042	20.1595
rs73200771	A	G	A	G	-0.163263	-0.0122814	0.0520806	0.03885	87893163	0.538997	0.0199915	244562	GCST90027450	12	88286940	0.0358564	5.28e-06	7738	0.00267278	7738	1.54318e-06	244562	TRUE	1.22524e-05	0.0026318	20.4133	42.2042	20.732
rs8052034	A	G	A	G	0.0740262	-0.00982193	0.559625	0.5153	51459537	0.217116	0.00795792	244562	GCST90027450	16	51493448	0.0163168	5.71e-06	7738	0.00265357	7738	6.22883e-06	244562	TRUE	2.15355e-05	0.00270098	20.9513	42.2042	20.5826
rs9974959	G	A	G	A	0.0758587	0.000966249	0.626736	0.6094	18167516	0.900682	0.00774239	244562	GCST90027450	21	19539833	0.0168922	7.1e-06	7738	0.00260011	7738	6.36858e-08	244562	TRUE	1.09595e-05	0.00269241	20.8847	42.2042	20.1669
rs10267604	C	G	C	G	-0.0764351	7.78e-05	0.653998	0.6452	122333549	0.992149	0.00790818	244562	GCST90027451	7	121973603	0.0169762	6.72e-06	7738	0.00261368	7738	3.9575e-10	244562	TRUE	9.46773e-06	0.00264406	20.5086	42.2042	20.2724
rs113902391	A	G	A	G	0.0922389	0.0129966	0.217886	0.2311	86850545	0.183095	0.00976244	244562	GCST90027451	5	86146362	0.01946	2.14e-06	7738	0.00289579	7738	7.24693e-06	244562	TRUE	9.37807e-06	0.00289973	22.4976	42.2042	22.4669
rs12490065	A	G	A	G	0.0959472	0.0110286	0.22917	0.2679	10585877	0.255071	0.0096902	244562	GCST90027451	3	10627561	0.0208734	4.29e-06	7738	0.00272381	7738	5.29648e-06	244562	TRUE	1.53236e-05	0.00325245	25.2431	42.2042	21.129
rs149811032	A	G	A	G	-0.142534	0.0167851	0.0677355	0.05419	49533859	0.273079	0.0153149	244562	GCST90027451	20	48150396	0.0320579	8.74e-06	7738	0.00254884	7738	4.91172e-06	244562	TRUE	2.87174e-05	0.0025658	19.9001	42.2042	19.7682
rs2846765	T	C	T	C	0.0802031	-0.00677954	0.515201	0.5378	865458	0.386992	0.00783685	244562	GCST90027451	18	865459	0.0173136	3.62e-06	7738	0.00276623	7738	3.06007e-06	244562	TRUE	1.04842e-05	0.0032133	24.9382	42.2042	21.4589
rs7707269	C	T	C	T	-0.0744962	-0.00686103	0.366956	0.3507	96592332	0.404973	0.00823878	244562	GCST90027451	5	95928036	0.0165717	6.94e-06	7738	0.00260546	7738	2.83574e-06	244562	TRUE	1.88653e-05	0.00257838	19.9979	42.2042	20.2085
rs77906768	G	A	G	A	0.133484	0.0022198	0.0861075	0.07464	74099026	0.876651	0.0143014	244562	GCST90027451	9	76713942	0.0293512	5.42e-06	7738	0.00266643	7738	9.85117e-08	244562	TRUE	8.66318e-06	0.0028043	21.7551	42.2042	20.6827
rs9545502	T	C	T	C	0.102021	0.0244809	0.197933	0.2464	80593846	0.00588098	0.0088881	244562	GCST90027451	13	81167981	0.0204183	5.84e-07	7738	0.0032168	7738	3.10197e-05	244562	TRUE	9.24468e-06	0.00330475	25.6503	42.2042	24.9655
rs1325380	C	T	C	T	0.162314	-0.00696962	0.242391	0.2464	108101205	0.456745	0.00936503	244562	GCST90027452	13	108753553	0.0352487	4.13e-06	7738	0.00273351	7738	2.26471e-06	244562	TRUE	1.07747e-05	0.00967617	75.5863	42.2042	21.2044
rs538952	A	C	A	C	0.274151	-0.00407709	0.0624269	0.04703	145243959	0.805164	0.0165286	244562	GCST90027452	6	145565095	0.060697	6.28e-06	7738	0.00263018	7738	2.48797e-07	244562	TRUE	1.07502e-05	0.00879805	68.6659	42.2042	20.4007
rs7068964	G	A	G	A	-0.130976	0.00353018	0.453157	0.4254	14233727	0.647785	0.00772736	244562	GCST90027452	10	14275726	0.0293547	8.13e-06	7738	0.00256682	7738	8.53386e-07	244562	TRUE	1.62698e-05	0.00850207	66.336	42.2042	19.908
rs7209568	G	A	G	A	0.172899	0.000963082	0.187878	0.1708	1218296	0.918635	0.00942781	244562	GCST90027452	17	1121590	0.0374386	3.87e-06	7738	0.00274937	7738	4.26697e-08	244562	TRUE	5.99432e-06	0.00912246	71.2211	42.2042	21.3278
rs72830406	G	C	G	C	-0.233287	-0.0179965	0.10827	0.1268	110159462	0.144874	0.0123443	244562	GCST90027452	10	111919220	0.0473559	8.38e-07	7738	0.0031272	7738	8.69068e-06	244562	TRUE	4.3895e-06	0.0105088	82.1594	42.2042	24.2679
rs72924202	T	C	T	C	-0.167725	-0.0126989	0.206071	0.1646	64365756	0.179685	0.0094646	244562	GCST90027452	11	64133228	0.0361181	3.42e-06	7738	0.00277984	7738	7.36103e-06	244562	TRUE	1.45955e-05	0.00920501	71.8715	42.2042	21.5648
rs10238229	T	C	T	C	0.0962573	0.00802879	0.794063	0.771	97604118	0.356627	0.0087098	244562	GCST90027453	7	97233430	0.0216067	8.39e-06	7738	0.00255895	7738	3.47454e-06	244562	TRUE	2.41512e-05	0.00303031	23.5137	42.2042	19.8468
rs1034938	G	A	G	A	-0.0883204	0.0150452	0.218123	0.2403	115729688	0.110272	0.00942108	244562	GCST90027453	10	117489198	0.0198362	8.49e-06	7738	0.0025561	7738	1.04281e-05	244562	TRUE	4.09727e-05	0.00266068	20.6379	42.2042	19.8246
rs11025798	A	G	A	G	0.0813802	-0.00522075	0.436503	0.4315	20884396	0.501326	0.0077643	244562	GCST90027453	11	20905942	0.0180881	6.82e-06	7738	0.00260976	7738	1.84874e-06	244562	TRUE	1.63516e-05	0.00325796	25.286	42.2042	20.2419
rs146068392	G	C	G	C	-0.176286	0.000179131	0.050432	0.0409	39886837	0.989659	0.0138209	244562	GCST90027453	2	40113977	0.0387331	5.33e-06	7738	0.0026705	7738	6.86885e-10	244562	TRUE	7.59004e-06	0.00297645	23.0945	42.2042	20.7143
rs1484839	A	G	A	G	-0.108324	-0.0180713	0.159734	0.1329	30542027	0.0605327	0.0096283	244562	GCST90027453	1	31014874	0.0239553	6.13e-06	7738	0.00263623	7738	1.44041e-05	244562	TRUE	3.76933e-05	0.00314988	24.4444	42.2042	20.4478
rs2007634	A	G	A	G	0.0725248	0.00680371	0.571356	0.5941	139959294	0.41949	0.00842767	244562	GCST90027453	3	139678136	0.0163421	9.08e-06	7738	0.00253943	7738	2.66496e-06	244562	TRUE	2.38028e-05	0.00257636	19.9822	42.2042	19.6951
rs2107539	T	C	T	C	-0.0987344	0.00684324	0.243451	0.227	35995574	0.440254	0.00886701	244562	GCST90027453	17	34322610	0.0219817	7.07e-06	7738	0.00260116	7738	2.43547e-06	244562	TRUE	1.82793e-05	0.003591	27.8801	42.2042	20.175
rs28733370	G	C	G	C	0.0950438	-0.0280424	0.192839	0.1605	58779385	0.00207874	0.00910838	244562	GCST90027453	15	59071584	0.020597	3.94e-06	7738	0.00274492	7738	3.87566e-05	244562	TRUE	6.28852e-05	0.00281211	21.8158	42.2042	21.2931
rs552787	A	C	A	C	-0.0880492	-0.00560167	0.643558	0.6738	116659656	0.516169	0.00862775	244562	GCST90027453	11	116530373	0.0171235	2.72e-07	7738	0.00340618	7738	1.72367e-06	244562	TRUE	7.58774e-07	0.00355678	27.6135	42.2042	26.4403
rs62228654	C	G	C	G	-0.156769	0.00388839	0.0668159	0.07771	44405346	0.763635	0.0129307	244562	GCST90027453	22	44801226	0.0341127	4.31e-06	7738	0.00272262	7738	3.69754e-07	244562	TRUE	7.8358e-06	0.00306477	23.7819	42.2042	21.1197
rs7023657	A	G	A	G	-0.0812649	0.00682644	0.261857	0.2628	8068400	0.409277	0.0082728	244562	GCST90027453	9	8068400	0.0183784	9.79e-06	7738	0.00252103	7738	2.78418e-06	244562	TRUE	2.58949e-05	0.00255294	19.8001	42.2042	19.552
rs943781	T	C	T	C	0.083589	-0.00517734	0.449683	0.4499	26993959	0.504386	0.0077551	244562	GCST90027453	13	27568096	0.0169924	8.69e-07	7738	0.00311829	7738	1.82244e-06	244562	TRUE	2.31848e-06	0.00345818	26.8453	42.2042	24.1985
rs981881	G	T	G	T	-0.07446	-0.00741438	0.371793	0.407	9783822	0.35852	0.008075	244562	GCST90027453	16	9877679	0.016842	9.82e-06	7738	0.00252027	7738	3.44728e-06	244562	TRUE	2.79069e-05	0.00258988	20.0874	42.2042	19.546
rs10831658	A	G	A	G	-0.0951081	-7.44e-05	0.207259	0.2352	2258142	0.993297	0.00885397	244562	GCST90027454	11	2279372	0.0199996	1.98e-06	7738	0.0029148	7738	2.88725e-10	244562	TRUE	2.89712e-06	0.00297242	23.0632	42.2042	22.6148
rs117300263	A	G	A	G	-0.169358	-0.0324522	0.0564102	0.03067	71854951	0.0853454	0.0188623	244562	GCST90027454	9	74469867	0.0374003	5.95e-06	7738	0.0026436	7738	1.21034e-05	244562	TRUE	3.25581e-05	0.00305339	23.6934	42.2042	20.5051
rs12495388	G	A	G	A	-0.121458	0.0175781	0.097635	0.09305	84877321	0.245252	0.015128	244562	GCST90027454	3	84926472	0.0269091	6.37e-06	7738	0.00262661	7738	5.5207e-06	244562	TRUE	2.25298e-05	0.00259938	20.1612	42.2042	20.3729
rs1941024	A	G	A	G	-0.0737051	-0.00591049	0.597554	0.6043	60508467	0.449975	0.00782373	244562	GCST90027454	11	60275940	0.0166612	9.7e-06	7738	0.0025233	7738	2.33363e-06	244562	TRUE	2.43196e-05	0.00261282	20.2657	42.2042	19.5696
rs2509667	A	C	A	C	-0.116273	-0.000722438	0.120838	0.1043	119490512	0.94926	0.0113526	244562	GCST90027454	11	119361224	0.0253157	4.37e-06	7738	0.00271944	7738	1.65585e-08	244562	TRUE	6.52941e-06	0.0028725	22.2857	42.2042	21.0949
rs286908	A	G	A	G	-0.0787738	0.00404238	0.293164	0.3139	34637310	0.627743	0.00833642	244562	GCST90027454	11	34658857	0.0174903	6.67e-06	7738	0.00261526	7738	9.61456e-07	244562	TRUE	1.37917e-05	0.00257172	19.9461	42.2042	20.2847
rs7251031	G	T	G	T	-0.0801886	-0.00117756	0.308219	0.2894	11156017	0.891944	0.00866842	244562	GCST90027454	19	11266693	0.0173897	4e-06	7738	0.00274115	7738	7.54571e-08	244562	TRUE	6.36536e-06	0.0027421	21.2712	42.2042	21.2638
rs8067677	A	G	A	G	0.0858815	0.00114553	0.299483	0.3119	9460546	0.893456	0.00855304	244562	GCST90027454	17	9363863	0.0182785	2.62e-06	7738	0.00284554	7738	7.33476e-08	244562	TRUE	4.22561e-06	0.00309471	24.015	42.2042	22.0759
rs9599845	C	T	C	T	0.0961761	-0.00191086	0.237425	0.182	71403998	0.842934	0.00964389	244562	GCST90027454	13	71978130	0.0202786	2.11e-06	7738	0.00289922	7738	1.60534e-07	244562	TRUE	3.61775e-06	0.00334945	25.9984	42.2042	22.4936
rs10006164	A	G	A	G	-0.0869582	0.00550466	0.344145	0.4008	1027810	0.490343	0.00798051	244562	GCST90027455	4	1021598	0.0177564	9.72e-07	7738	0.00309065	7738	1.94542e-06	244562	TRUE	2.62648e-06	0.0034135	26.4973	42.2042	23.9834
rs11171846	T	C	T	C	-0.140647	0.0161907	0.0821696	0.09509	56434272	0.298443	0.0155713	244562	GCST90027455	12	56828056	0.0292656	1.54e-06	7738	0.0029767	7738	4.42073e-06	244562	TRUE	5.44369e-06	0.00298376	23.1515	42.2042	23.0965
rs12772838	T	C	T	C	0.168169	-0.0113896	0.0554534	0.06748	125147706	0.554879	0.0192892	244562	GCST90027455	10	126836275	0.0366832	4.55e-06	7738	0.00270934	7738	1.42561e-06	244562	TRUE	1.04418e-05	0.0029626	22.9868	42.2042	21.0164
rs1451459	A	G	A	G	0.0838938	-0.00544908	0.252245	0.2444	52861274	0.529373	0.00866359	244562	GCST90027455	2	53088412	0.0187222	7.43e-06	7738	0.00258883	7738	1.61758e-06	244562	TRUE	1.71234e-05	0.00265504	20.5941	42.2042	20.0792
rs1514681	C	T	C	T	-0.0787943	0.00295591	0.401121	0.3926	1393272	0.712212	0.00801305	244562	GCST90027455	2	1397044	0.0171089	4.12e-06	7738	0.00273426	7738	5.56418e-07	244562	TRUE	7.91924e-06	0.00298287	23.1445	42.2042	21.2102
rs1968451	C	T	C	T	0.0887818	-0.00157838	0.680629	0.6626	5391911	0.847673	0.00821695	244562	GCST90027455	19	5391922	0.0199045	8.18e-06	7738	0.00256515	7738	1.50875e-07	244562	TRUE	1.32652e-05	0.00342676	26.6006	42.2042	19.8951
rs2430691	C	T	C	T	0.0727985	-0.000614669	0.42366	0.4182	14912817	0.938453	0.00796055	244562	GCST90027455	12	15065751	0.0164296	9.38e-06	7738	0.00253147	7738	2.43787e-08	244562	TRUE	1.38114e-05	0.00258804	20.073	42.2042	19.6332
rs2654736	A	G	A	G	0.0985757	-0.00362876	0.811446	0.7873	111385356	0.688462	0.00905056	244562	GCST90027455	4	112306512	0.0213797	4.01e-06	7738	0.00274049	7738	6.57324e-07	244562	TRUE	7.93567e-06	0.00297348	23.0714	42.2042	21.2587
rs437545	A	T	A	T	0.139229	0.00279435	0.0771995	0.07566	24200055	0.875547	0.017842	244562	GCST90027455	16	24211376	0.0313643	9.03e-06	7738	0.00254078	7738	1.00298e-07	244562	TRUE	1.41865e-05	0.00276192	21.4254	42.2042	19.7055
rs61798216	G	A	G	A	-0.118636	0.00617258	0.113593	0.1115	36457429	0.693367	0.0156549	244562	GCST90027455	4	36459051	0.026406	7.03e-06	7738	0.00260243	7738	6.3569e-07	244562	TRUE	1.34831e-05	0.00283431	21.9886	42.2042	20.185
rs74949229	A	G	A	G	-0.136496	0.0206607	0.0937893	0.06442	9484983	0.188133	0.0156982	244562	GCST90027455	10	9526946	0.0283337	1.45e-06	7738	0.002991	7738	7.08278e-06	244562	TRUE	6.48587e-06	0.00316703	24.578	42.2042	23.2078
rs75967282	C	G	C	G	-0.178428	-0.00382876	0.0513485	0.07873	61443077	0.728479	0.0110291	244562	GCST90027455	17	59520438	0.0377704	2.31e-06	7738	0.00287644	7738	4.92774e-07	244562	TRUE	4.48116e-06	0.00310163	24.0689	42.2042	22.3163
rs1396212	T	C	T	C	-0.120916	-0.00343818	0.186799	0.1881	55522710	0.709586	0.00923219	244562	GCST90027456	17	53600071	0.0234319	2.47e-07	7738	0.00343039	7738	5.67103e-07	244562	TRUE	5.38254e-07	0.00444191	34.516	42.2042	26.6289
rs4551833	G	T	G	T	-0.184975	-0.00458384	0.0539418	0.06237	42710551	0.786522	0.0169252	244562	GCST90027456	12	43104353	0.0364893	3.99e-07	7738	0.00331084	7738	2.99921e-07	244562	TRUE	7.79314e-07	0.0034922	27.1103	42.2042	25.6977
rs1093520	G	T	G	T	0.179202	-0.00902857	0.915857	0.8834	98530106	0.479189	0.0127593	244562	GCST90027457	7	98159418	0.0334241	8.26e-08	7738	0.00370202	7738	2.04738e-06	244562	TRUE	2.58922e-07	0.0049495	38.4798	42.2042	28.7453
rs11215785	C	T	C	T	0.116001	0.00568009	0.136228	0.1442	116093430	0.643821	0.0122849	244562	GCST90027457	11	115964147	0.0242663	1.75e-06	7738	0.00294523	7738	8.74139e-07	244562	TRUE	3.78398e-06	0.00316679	24.5761	42.2042	22.8516
rs136110	C	T	C	T	0.0930184	0.00240433	0.208243	0.2495	46973764	0.780423	0.00862485	244562	GCST90027457	22	47369660	0.0202956	4.58e-06	7738	0.00270794	7738	3.1776e-07	244562	TRUE	8.14889e-06	0.00285319	22.1354	42.2042	21.0055
rs1483968	T	C	T	C	0.150674	-0.0209712	0.0577669	0.0818	22482904	0.135237	0.0140392	244562	GCST90027457	14	22951893	0.034063	9.72e-06	7738	0.00252288	7738	9.12379e-06	244562	TRUE	4.28796e-05	0.00247141	19.1662	42.2042	19.5664
rs61915762	A	G	A	G	0.0875261	-0.00058127	0.275511	0.2566	130572766	0.947678	0.00885772	244562	GCST90027457	11	130442661	0.0180386	1.22e-06	7738	0.00303412	7738	1.76087e-08	244562	TRUE	1.90757e-06	0.00305827	23.7314	42.2042	23.5434
rs62018962	A	C	A	C	-0.143107	-0.0269744	0.0988924	0.08793	95436288	0.0490027	0.0137025	244562	GCST90027457	15	95979517	0.031333	4.94e-06	7738	0.00268925	7738	1.58456e-05	244562	TRUE	3.32855e-05	0.00364999	28.3397	42.2042	20.8602
rs73200771	A	G	A	G	-0.163792	-0.0122814	0.0520806	0.03885	87893163	0.538997	0.0199915	244562	GCST90027457	12	88286940	0.035928	5.14e-06	7738	0.0026794	7738	1.54318e-06	244562	TRUE	1.19443e-05	0.00264888	20.5462	42.2042	20.7835
rs7848585	G	A	G	A	0.121487	0.0125748	0.101813	0.1155	77055688	0.231112	0.0105009	244562	GCST90027457	9	79670604	0.0273197	8.71e-06	7738	0.00254966	7738	5.86358e-06	244562	TRUE	3.09524e-05	0.00269935	20.9387	42.2042	19.7746
rs112209173	C	G	C	G	0.226024	0.027922	0.063751	0.06851	7667185	0.0317856	0.0130045	244562	GCST90027458	1	7727245	0.049242	4.43e-06	7738	0.00271606	7738	1.88499e-05	244562	TRUE	3.45994e-05	0.00609842	47.4669	42.2042	21.0687
rs1621183	G	A	G	A	0.204076	0.0163642	0.0696815	0.0593	25478568	0.252012	0.0142859	244562	GCST90027458	10	25767497	0.0446233	4.8e-06	7738	0.00269632	7738	5.36518e-06	244562	TRUE	1.70976e-05	0.00539962	41.9982	42.2042	20.9151
rs17193211	T	C	T	C	0.190762	-0.0210558	0.0746269	0.08691	37513203	0.163703	0.0151184	244562	GCST90027458	21	38885506	0.0409712	3.22e-06	7738	0.00279444	7738	7.93125e-06	244562	TRUE	1.4393e-05	0.00502604	39.0779	42.2042	21.6784
rs2189903	C	A	C	A	0.212169	-0.000958965	0.057391	0.07464	8506438	0.940184	0.0127796	244562	GCST90027458	7	8546068	0.0475208	8.02e-06	7738	0.00257017	7738	2.30242e-08	244562	TRUE	1.1842e-05	0.00487045	37.8622	42.2042	19.9341
rs35899940	G	A	G	A	0.101402	0.00951479	0.382337	0.3916	85510466	0.261695	0.00847723	244562	GCST90027458	15	86053697	0.0218724	3.55e-06	7738	0.00277063	7738	5.15113e-06	244562	TRUE	1.26822e-05	0.00485647	37.753	42.2042	21.4932
rs56301029	C	G	C	G	0.108725	0.00259823	0.316134	0.271	98498829	0.772832	0.00900062	244562	GCST90027458	9	101261111	0.023115	2.56e-06	7738	0.00285177	7738	3.40742e-07	244562	TRUE	4.69574e-06	0.0051113	39.7441	42.2042	22.1244
rs7134245	A	C	A	C	0.186896	0.0218024	0.077241	0.07464	32408591	0.0853729	0.0126734	244562	GCST90027458	12	32561525	0.0410013	5.16e-06	7738	0.0026787	7738	1.21013e-05	244562	TRUE	2.85975e-05	0.00497928	38.7124	42.2042	20.778
rs7229834	T	C	T	C	0.106916	-0.00439469	0.470799	0.4959	61853127	0.570289	0.00774223	244562	GCST90027458	18	59520360	0.0214352	6.1e-07	7738	0.00320567	7738	1.31746e-06	244562	TRUE	1.52082e-06	0.00569602	44.3168	42.2042	24.8789
rs142998520	A	C	A	C	0.173555	0.0216682	0.0523446	0.06237	6852378	0.231707	0.0181176	244562	GCST90027459	17	6755697	0.0392371	9.72e-06	7738	0.00252271	7738	5.84864e-06	244562	TRUE	3.42225e-05	0.00298832	23.1869	42.2042	19.565
rs2180	A	G	A	G	-0.0832534	0.00558202	0.261092	0.2914	32971971	0.551498	0.0093734	244562	GCST90027459	21	34344279	0.0185921	7.54e-06	7738	0.00258527	7738	1.45011e-06	244562	TRUE	1.69069e-05	0.00267435	20.7442	42.2042	20.0515
rs28635178	A	G	A	G	-0.157135	-0.00622399	0.0565904	0.06646	66040991	0.690914	0.0156533	244562	GCST90027459	3	66026666	0.0350722	7.45e-06	7738	0.00258808	7738	6.46457e-07	244562	TRUE	1.42935e-05	0.00263645	20.4495	42.2042	20.0733
rs2995916	G	T	G	T	0.079086	0.0109979	0.501878	0.5174	37909375	0.167249	0.00796316	244562	GCST90027459	4	37910996	0.0166671	2.08e-06	7738	0.00290202	7738	7.79938e-06	244562	TRUE	9.54009e-06	0.00312725	24.2683	42.2042	22.5154
rs7033951	T	C	T	C	0.0740912	-0.00552827	0.506403	0.4622	14744707	0.471897	0.0076846	244562	GCST90027459	9	14744705	0.016363	5.96e-06	7738	0.00264327	7738	2.11617e-06	244562	TRUE	1.49243e-05	0.0027443	21.2883	42.2042	20.5025
rs73133343	G	T	G	T	0.178631	0.000657033	0.0524294	0.05215	42725914	0.964779	0.0148794	244562	GCST90027459	12	43119716	0.0365904	1.05e-06	7738	0.00307133	7738	7.97297e-09	244562	TRUE	1.61879e-06	0.00317052	24.6051	42.2042	23.833
rs770027	T	C	T	C	0.0773298	-0.0051343	0.459954	0.4652	9112377	0.505189	0.00770514	244562	GCST90027459	1	9172436	0.0163142	2.14e-06	7738	0.00289592	7738	1.81558e-06	244562	TRUE	5.42687e-06	0.00297077	23.0503	42.2042	22.4679
rs7777432	A	G	A	G	0.0763596	0.00340201	0.349483	0.3384	21373561	0.69398	0.0086464	244562	GCST90027459	7	21413179	0.0170041	7.1e-06	7738	0.0026	7738	6.33016e-07	244562	TRUE	1.36022e-05	0.0026512	20.5642	42.2042	20.166
rs7953577	C	G	C	G	-0.0786353	0.00342163	0.326388	0.3476	104480522	0.657926	0.00772764	244562	GCST90027459	12	104874300	0.0175409	7.36e-06	7738	0.00259112	7738	8.01654e-07	244562	TRUE	1.46431e-05	0.002719	21.0915	42.2042	20.097
rs919100	A	C	A	C	-0.0761891	0.00164053	0.651308	0.6892	37090833	0.841576	0.00820766	244562	GCST90027459	4	37092455	0.0168886	6.44e-06	7738	0.00262386	7738	1.6336e-07	244562	TRUE	1.06101e-05	0.0026366	20.4506	42.2042	20.3516
rs113403124	C	T	C	T	0.148864	0.00701686	0.0764148	0.06033	134265403	0.588751	0.0129786	244562	GCST90027460	6	134586541	0.0329176	6.12e-06	7738	0.0026367	7738	1.1952e-06	244562	TRUE	1.32735e-05	0.00312798	24.274	42.2042	20.4514
rs142048748	G	A	G	A	-0.172479	-0.00462817	0.0511089	0.05419	121797142	0.792489	0.0175923	244562	GCST90027460	12	122235048	0.0386304	8.01e-06	7738	0.00257028	7738	2.83002e-07	244562	TRUE	1.37609e-05	0.00288546	22.3865	42.2042	19.9349
rs1447470	A	G	A	G	0.0891093	-0.0126142	0.735812	0.6881	112825748	0.150896	0.00878198	244562	GCST90027460	11	112696471	0.0196522	5.78e-06	7738	0.00265066	7738	8.43618e-06	244562	TRUE	2.54805e-05	0.00308714	23.9561	42.2042	20.56
rs1752223	G	C	G	C	-0.0976795	0.00492633	0.168276	0.1687	81215167	0.613628	0.00975701	244562	GCST90027460	1	81680852	0.0219673	8.72e-06	7738	0.00254934	7738	1.04238e-06	244562	TRUE	1.80825e-05	0.00267078	20.7165	42.2042	19.7721
rs17561784	T	C	T	C	0.122378	-0.0110244	0.117215	0.1084	147680282	0.410591	0.0133978	244562	GCST90027460	5	147059845	0.0255005	1.59e-06	7738	0.00296826	7738	2.76859e-06	244562	TRUE	4.6904e-06	0.00309938	24.0513	42.2042	23.0308
rs393435	C	T	C	T	0.0853315	-0.0139386	0.687467	0.6789	84310927	0.0956489	0.00836488	244562	GCST90027460	16	84344533	0.0182062	2.77e-06	7738	0.0028316	7738	1.13535e-05	244562	TRUE	1.55821e-05	0.00312893	24.2814	42.2042	21.9675
rs4683140	C	T	C	T	-0.0783129	-0.00591664	0.579406	0.5746	45781426	0.444525	0.00773847	244562	GCST90027460	3	45822918	0.0167721	3.02e-06	7738	0.0028103	7738	2.3903e-06	244562	TRUE	8.16635e-06	0.00298912	23.1931	42.2042	21.8018
rs511179	C	G	C	G	-0.115706	0.0102194	0.85471	0.8773	130517454	0.38573	0.0117818	244562	GCST90027460	9	133392841	0.0232243	6.29e-07	7738	0.0031983	7738	3.07637e-06	244562	TRUE	2.03085e-06	0.00332504	25.8083	42.2042	24.8214
rs72770359	A	G	A	G	0.119653	-0.000811196	0.104329	0.1247	247198016	0.942545	0.0112554	244562	GCST90027460	1	247361318	0.0268999	8.66e-06	7738	0.00255106	7738	2.12394e-08	244562	TRUE	1.27356e-05	0.00267566	20.7544	42.2042	19.7854
rs75789763	A	G	A	G	-0.166597	0.010831	0.0562994	0.02556	129482714	0.573304	0.0192314	244562	GCST90027460	4	130403869	0.0367955	5.96e-06	7738	0.00264289	7738	1.29696e-06	244562	TRUE	1.31958e-05	0.00294919	22.8824	42.2042	20.4996
rs10405432	G	A	G	A	-0.083123	-0.00139133	0.346808	0.3282	32508987	0.875726	0.00889657	244562	GCST90027461	19	32999893	0.0177562	2.85e-06	7738	0.00282486	7738	1.00007e-07	244562	TRUE	4.66812e-06	0.00313042	24.293	42.2042	21.915
rs11745906	C	T	C	T	-0.0874056	-0.0172366	0.281706	0.2904	84279372	0.0348498	0.00816862	244562	GCST90027461	5	83575190	0.0177712	8.73e-07	7738	0.00311726	7738	1.82059e-05	244562	TRUE	7.81827e-06	0.00309177	23.9921	42.2042	24.1905
rs145140903	C	T	C	T	-0.115636	-0.0246438	0.111675	0.09407	231228880	0.138096	0.0166184	244562	GCST90027461	1	231364626	0.0261618	9.87e-06	7738	0.00251906	7738	8.99177e-06	244562	TRUE	4.314e-05	0.00265304	20.5785	42.2042	19.5367
rs16856918	A	G	A	G	0.171977	-0.0245419	0.0552139	0.04499	217095790	0.242341	0.0209911	244562	GCST90027461	2	217960513	0.0365088	2.47e-06	7738	0.00286013	7738	5.58929e-06	244562	TRUE	9.39874e-06	0.00308569	23.9448	42.2042	22.1894
rs2620868	C	T	C	T	-0.0759932	0.00444067	0.438608	0.4305	60976989	0.570479	0.00782709	244562	GCST90027461	12	61370770	0.0162372	2.87e-06	7738	0.00282347	7738	1.31616e-06	244562	TRUE	6.60365e-06	0.00284395	22.0636	42.2042	21.9042
rs3819331	C	T	C	T	0.104197	0.0165153	0.159253	0.1401	112228687	0.130839	0.0109315	244562	GCST90027461	11	112099410	0.0227743	4.76e-06	7738	0.00269855	7738	9.33309e-06	244562	TRUE	2.25856e-05	0.00290732	22.5566	42.2042	20.9325
rs72987936	A	T	A	T	-0.0755081	0.0102441	0.364515	0.2863	77408952	0.216675	0.00829201	244562	GCST90027461	18	75120908	0.0170631	9.63e-06	7738	0.00252497	7738	6.24079e-06	244562	TRUE	3.49691e-05	0.00264142	20.4882	42.2042	19.5826
rs73171592	C	G	C	G	0.143446	0.0139131	0.0771743	0.07975	171329406	0.357752	0.0151286	244562	GCST90027461	3	171047195	0.0311211	4.04e-06	7738	0.00273879	7738	3.45832e-06	244562	TRUE	1.2161e-05	0.00293089	22.74	42.2042	21.2455
rs80343422	G	A	G	A	-0.156491	-0.00212242	0.0761024	0.05624	109803975	0.882045	0.0143042	244562	GCST90027461	13	110456322	0.030699	3.44e-07	7738	0.00334778	7738	9.00222e-08	244562	TRUE	6.04632e-07	0.00344374	26.7329	42.2042	25.9855
rs10220585	T	C	T	C	0.164702	0.00754335	0.581202	0.59	85273504	0.332992	0.00779187	244562	GCST90027462	14	85739848	0.0347972	2.21e-06	7738	0.0028876	7738	3.83228e-06	244562	TRUE	7.18892e-06	0.0132056	103.526	42.2042	22.4032
rs10808847	A	C	A	C	0.176398	-0.0166204	0.744131	0.7413	81984165	0.0649382	0.00900501	244562	GCST90027462	8	82896400	0.0397821	9.25e-06	7738	0.00253509	7738	1.39291e-05	244562	TRUE	5.3382e-05	0.0118491	92.7636	42.2042	19.6613
rs10894222	A	G	A	G	-0.147598	-0.0117969	0.530454	0.5327	130578149	0.12316	0.00765215	244562	GCST90027462	11	130448044	0.0332071	8.8e-06	7738	0.00254727	7738	9.71804e-06	244562	TRUE	4.06018e-05	0.0108522	84.8735	42.2042	19.756
rs1094973	G	T	G	T	0.164693	0.00776016	0.620845	0.6022	65936825	0.325129	0.00788656	244562	GCST90027462	16	65970728	0.0347218	2.1e-06	7738	0.0028998	7738	3.95894e-06	244562	TRUE	6.95412e-06	0.0127697	100.064	42.2042	22.4981
rs111457769	C	T	C	T	0.260543	0.0165141	0.112372	0.1002	75066981	0.162664	0.0118282	244562	GCST90027462	7	74482794	0.0564797	3.97e-06	7738	0.00274324	7738	7.97051e-06	244562	TRUE	1.74743e-05	0.0135418	106.198	42.2042	21.2801
rs12638646	A	G	A	G	-0.180901	0.00861688	0.287611	0.2536	105403370	0.311786	0.00851907	244562	GCST90027462	3	105122214	0.0391484	3.82e-06	7738	0.00275258	7738	4.18339e-06	244562	TRUE	1.24231e-05	0.0134102	105.151	42.2042	21.3528
rs12781290	A	G	A	G	0.17085	-0.0117994	0.334687	0.3098	71231338	0.169151	0.00858177	244562	GCST90027462	10	72991095	0.0375839	5.47e-06	7738	0.0026641	7738	7.72995e-06	244562	TRUE	2.31028e-05	0.0129994	101.888	42.2042	20.6646
rs2010151	C	A	C	A	-0.154264	0.00129759	0.420012	0.4305	31806327	0.866076	0.00769422	244562	GCST90027462	5	31806434	0.0346348	8.43e-06	7738	0.00255785	7738	1.16295e-07	244562	TRUE	1.33966e-05	0.0115942	90.7447	42.2042	19.8383
rs2592994	T	C	T	C	0.154966	-0.00457327	0.437869	0.4652	85404182	0.558654	0.00781967	244562	GCST90027462	9	88019097	0.0350142	9.61e-06	7738	0.00252563	7738	1.39859e-06	244562	TRUE	2.1101e-05	0.0118218	92.5477	42.2042	19.5877
rs35006616	A	G	A	G	0.155262	0.0106984	0.478529	0.4765	16029003	0.165239	0.00770964	244562	GCST90027462	7	16068628	0.0341787	5.55e-06	7738	0.00266039	7738	7.87373e-06	244562	TRUE	2.36589e-05	0.0120309	94.2045	42.2042	20.6357
rs4383249	G	T	G	T	0.195242	0.00542285	0.182145	0.1636	67213061	0.60379	0.0104495	244562	GCST90027462	18	64880298	0.0436496	7.72e-06	7738	0.00257957	7738	1.10123e-06	244562	TRUE	1.62672e-05	0.0113572	88.8683	42.2042	20.0072
rs62043566	C	T	C	T	0.155445	0.0117427	0.408328	0.407	93137549	0.133737	0.00783094	244562	GCST90027462	15	93680778	0.0348289	8.08e-06	7738	0.00256827	7738	9.19431e-06	244562	TRUE	3.63669e-05	0.0116755	91.3883	42.2042	19.9193
rs72727948	A	C	A	C	-0.306134	-0.0405952	0.0684841	0.08896	133951366	0.0262694	0.018268	244562	GCST90027462	8	134963609	0.0692836	9.94e-06	7738	0.00251739	7738	2.01918e-05	244562	TRUE	7.52339e-05	0.0119573	93.6211	42.2042	19.5237
rs61817056	T	C	T	C	-0.146109	0.0148716	0.285203	0.2955	204272379	0.0973666	0.00897092	244562	GCST90027463	1	204241507	0.0326057	7.43e-06	7738	0.00258896	7738	1.1237e-05	244562	TRUE	3.79854e-05	0.00870404	67.9257	42.2042	20.0801
rs706111	A	T	A	T	0.231567	0.00451328	0.122654	0.183	33244485	0.659654	0.0102483	244562	GCST90027463	9	33244483	0.0457302	4.11e-07	7738	0.00330365	7738	7.93032e-07	244562	TRUE	9.32589e-07	0.0115408	90.322	42.2042	25.6417
rs11209445	G	A	G	A	0.0915904	-0.0133741	0.621444	0.6452	69395322	0.114968	0.00848475	244562	GCST90027464	1	69861005	0.020289	6.35e-06	7738	0.00262736	7738	1.01592e-05	244562	TRUE	3.09559e-05	0.00394695	30.6546	42.2042	20.3788
rs11761901	A	G	A	G	-0.111105	-0.000819925	0.217568	0.2485	116251632	0.924649	0.00866918	244562	GCST90027464	7	115891686	0.0239709	3.57e-06	7738	0.00276935	7738	3.65769e-08	244562	TRUE	5.50852e-06	0.0042028	32.6501	42.2042	21.4832
rs13087509	T	C	T	C	-0.186384	0.024217	0.928931	0.92025	22472645	0.0960218	0.0145495	244562	GCST90027464	3	22514136	0.0410643	5.66e-06	7738	0.00265593	7738	1.1328e-05	244562	TRUE	2.97978e-05	0.00458681	35.6471	42.2042	20.601
rs4645624	G	A	G	A	0.104313	0.00249506	0.238138	0.2301	24034182	0.760507	0.00818549	244562	GCST90027464	9	24034180	0.0232806	7.44e-06	7738	0.00258849	7738	3.79916e-07	244562	TRUE	1.32521e-05	0.00394832	30.6652	42.2042	20.0765
rs4883632	T	C	T	C	-0.0916478	0.00972468	0.51449	0.4611	132621435	0.210916	0.00777321	244562	GCST90027464	12	133198021	0.0206394	8.98e-06	7738	0.00254231	7738	6.39973e-06	244562	TRUE	3.31547e-05	0.00419613	32.5981	42.2042	19.7174
rs62305209	G	A	G	A	-0.16418	-0.0128091	0.0836224	0.1022	46870111	0.263874	0.0114645	244562	GCST90027464	4	46872128	0.0364364	6.61e-06	7738	0.00261767	7738	5.10432e-06	244562	TRUE	2.25051e-05	0.00413112	32.0909	42.2042	20.3034
rs11253111	C	T	C	T	-0.088334	0.000465508	0.445402	0.4683	5338701	0.9524	0.00779834	244562	GCST90027465	10	5380664	0.0191906	4.16e-06	7738	0.00273133	7738	1.45702e-08	244562	TRUE	6.21143e-06	0.00385493	29.9371	42.2042	21.1874
rs13235115	C	T	C	T	0.155456	0.00237644	0.877922	0.8671	155339507	0.838935	0.0116919	244562	GCST90027465	7	155131747	0.0290665	8.88e-08	7738	0.00368392	7738	1.68928e-07	244562	TRUE	1.72754e-07	0.0051801	40.2819	42.2042	28.6042
rs17175056	G	A	G	A	0.127861	0.0183515	0.122589	0.1738	94127030	0.113181	0.0115851	244562	GCST90027465	13	94779284	0.0287119	8.46e-06	7738	0.00255696	7738	1.02601e-05	244562	TRUE	4.0444e-05	0.00351691	27.3028	42.2042	19.8314
rs6085392	A	G	A	G	0.0978381	0.0119842	0.260986	0.2597	6086077	0.22084	0.00978863	244562	GCST90027465	20	6066724	0.021937	8.2e-06	7738	0.00256466	7738	6.12895e-06	244562	TRUE	2.98608e-05	0.00369246	28.6707	42.2042	19.8912
rs6123777	A	G	A	G	0.153475	-0.024558	0.101285	0.1319	58210333	0.0499689	0.0125281	244562	GCST90027465	20	56785389	0.0343227	7.77e-06	7738	0.00257795	7738	1.57117e-05	244562	TRUE	4.96974e-05	0.00428817	33.3162	42.2042	19.9946
rs61861701	G	A	G	A	0.116389	0.010727	0.245597	0.1851	110605246	0.28151	0.00996069	244562	GCST90027465	10	112365004	0.0229379	3.89e-07	7738	0.00331709	7738	4.74231e-06	244562	TRUE	1.5549e-06	0.00501973	39.0285	42.2042	25.7464
rs72770371	G	C	G	C	-0.147139	0.00291807	0.0938459	0.1084	247204834	0.796617	0.0113223	244562	GCST90027465	1	247368136	0.0326224	6.47e-06	7738	0.00262281	7738	2.71604e-07	244562	TRUE	1.11627e-05	0.00368216	28.5905	42.2042	20.3434
rs743920	G	C	G	C	-0.151934	0.0172239	0.128486	0.1155	29225139	0.155777	0.0121345	244562	GCST90027465	22	29621128	0.0322058	2.39e-06	7738	0.00286865	7738	8.23819e-06	244562	TRUE	1.11459e-05	0.00516976	40.2011	42.2042	22.2557
rs7659451	G	A	G	A	0.113654	-0.016454	0.824174	0.8599	10728889	0.178095	0.0122185	244562	GCST90027465	4	10730513	0.0255139	8.41e-06	7738	0.00255851	7738	7.4151e-06	244562	TRUE	3.35647e-05	0.0037437	29.0701	42.2042	19.8434
rs776910	G	A	G	A	0.112024	0.00185564	0.825487	0.8129	10786483	0.847631	0.00965765	244562	GCST90027465	1	10846540	0.0251821	8.65e-06	7738	0.0025516	7738	1.50959e-07	244562	TRUE	1.39885e-05	0.00361568	28.0724	42.2042	19.7897
rs116470157	T	C	T	C	-0.157257	0.0399293	0.0655714	0.07157	64868952	0.00231478	0.0131064	244562	GCST90027466	2	65096086	0.0345673	5.38e-06	7738	0.00266816	7738	3.79504e-05	244562	TRUE	8.03685e-05	0.00303047	23.515	42.2042	20.6961
rs11731492	T	C	T	C	0.157379	-0.0105962	0.0717673	0.0726	15151729	0.510587	0.0161055	244562	GCST90027466	4	15153353	0.0350092	6.95e-06	7738	0.00260543	7738	1.76997e-06	244562	TRUE	1.64363e-05	0.00329995	25.6129	42.2042	20.2083
rs12621639	A	C	A	C	0.0768744	0.0048246	0.505619	0.4939	229311098	0.535042	0.0077775	244562	GCST90027466	2	230175814	0.0171812	7.66e-06	7738	0.00258118	7738	1.57346e-06	244562	TRUE	1.75158e-05	0.00295446	22.9235	42.2042	20.0197
rs13336538	G	A	G	A	0.0912246	0.00281114	0.244732	0.273	25899444	0.733765	0.0082651	244562	GCST90027466	16	25910765	0.0200654	5.46e-06	7738	0.00266473	7738	4.73023e-07	244562	TRUE	1.0134e-05	0.00307642	23.8726	42.2042	20.6694
rs1480889	T	C	T	C	0.0758833	-0.00403171	0.458528	0.4949	92342810	0.599962	0.00768743	244562	GCST90027466	8	93355038	0.016962	7.69e-06	7738	0.00258048	7738	1.12468e-06	244562	TRUE	1.62813e-05	0.00285933	22.1832	42.2042	20.0142
rs17503513	T	G	T	G	0.104512	-0.0186092	0.207469	0.2147	17435803	0.0417609	0.00914055	244562	GCST90027466	8	17293312	0.0212123	8.35e-07	7738	0.00312809	7738	1.6948e-05	244562	TRUE	7.07182e-06	0.00359196	27.8876	42.2042	24.2749
rs1940965	C	A	C	A	-0.138755	-0.00564251	0.084563	0.1074	105895135	0.657358	0.0127209	244562	GCST90027466	11	105765861	0.0310613	7.93e-06	7738	0.0025729	7738	8.04501e-07	244562	TRUE	1.57247e-05	0.00298082	23.1286	42.2042	19.9553
rs342221	T	G	T	G	-0.076973	-0.00286029	0.440168	0.4121	106687688	0.710392	0.00770283	244562	GCST90027466	7	106328134	0.0172478	8.09e-06	7738	0.00256789	7738	5.63811e-07	244562	TRUE	1.51399e-05	0.00292	22.6553	42.2042	19.9163
rs395474	A	G	A	G	0.1524	-0.026387	0.921998	0.909	107094100	0.185355	0.019923	244562	GCST90027466	4	108015257	0.0325768	2.89e-06	7738	0.00282104	7738	7.17265e-06	244562	TRUE	1.23377e-05	0.00334069	25.9302	42.2042	21.8853
rs76523770	T	G	T	G	0.152249	0.0038465	0.0689696	0.06953	36059962	0.80346	0.0154558	244562	GCST90027466	4	36061584	0.0343819	9.5e-06	7738	0.00252833	7738	2.53259e-07	244562	TRUE	1.60279e-05	0.00297687	23.0979	42.2042	19.6087
rs17729512	G	A	G	A	0.204838	0.0167864	0.0721954	0.07566	88293773	0.291259	0.0159058	244562	GCST90027467	8	89306002	0.0461462	9.04e-06	7738	0.00254055	7738	4.55425e-06	244562	TRUE	2.87192e-05	0.00562105	43.7302	42.2042	19.7038
rs2420129	A	C	A	C	-0.193205	-0.0102346	0.919003	0.92843	26331749	0.374679	0.0115288	244562	GCST90027467	13	26905886	0.043613	9.42e-06	7738	0.00253039	7738	3.22246e-06	244562	TRUE	2.62256e-05	0.00555716	43.2304	42.2042	19.6248
rs2514587	A	G	A	G	0.114772	0.00860084	0.626008	0.6595	118587453	0.31716	0.00859817	244562	GCST90027467	8	119599692	0.02552	6.88e-06	7738	0.00260771	7738	4.0915e-06	244562	TRUE	2.13299e-05	0.006168	48.0118	42.2042	20.226
rs4711791	A	G	A	G	-0.131441	0.00833888	0.311064	0.3016	44630818	0.317224	0.00833739	244562	GCST90027467	6	44598555	0.0266352	8.02e-07	7738	0.00313811	7738	4.09042e-06	244562	TRUE	2.85985e-06	0.00740492	57.7118	42.2042	24.3528
rs7222065	T	C	T	C	-0.208307	-0.000633538	0.0927288	0.1186	71320370	0.967253	0.0154319	244562	GCST90027467	17	69316511	0.0432142	1.43e-06	7738	0.00299458	7738	6.89162e-09	244562	TRUE	2.17976e-06	0.00730112	56.8969	42.2042	23.2356
rs7937701	G	A	G	A	-0.120752	-0.00601673	0.499312	0.4734	73121632	0.446641	0.00790607	244562	GCST90027467	11	72832677	0.024402	7.48e-07	7738	0.00315536	7738	2.36817e-06	244562	TRUE	2.18122e-06	0.00729051	56.8136	42.2042	24.4871
rs9542995	A	G	A	G	-0.171703	-0.0068245	0.286838	0.3374	72536186	0.411941	0.00831767	244562	GCST90027467	13	73110324	0.0355509	1.37e-06	7738	0.00300629	7738	2.75266e-06	244562	TRUE	4.04982e-06	0.0120618	94.449	42.2042	23.3268
rs117047298	A	T	A	T	0.196059	-0.0035288	0.159337	0.1513	58355515	0.735987	0.0104659	244562	GCST90027468	11	58122988	0.0400752	9.97e-07	7738	0.00308435	7738	4.64856e-07	244562	TRUE	1.98575e-06	0.0102977	80.4922	42.2042	23.9344
rs1366424	A	G	A	G	0.185118	-0.00894903	0.134736	0.1053	40183162	0.376136	0.0101115	244562	GCST90027468	2	40410302	0.0419062	9.99e-06	7738	0.00251611	7738	3.20286e-06	244562	TRUE	2.7636e-05	0.00799024	62.3103	42.2042	19.5137
rs146624623	G	A	G	A	-0.223714	-0.00114742	0.10064	0.08078	152787777	0.94575	0.0168627	244562	GCST90027468	7	152484862	0.0504934	9.4e-06	7738	0.00253105	7738	1.89323e-08	244562	TRUE	1.37338e-05	0.00905984	70.7277	42.2042	19.6299
rs1866720	C	G	C	G	0.153926	-0.0015919	0.342302	0.3834	2161517	0.844222	0.00810144	244562	GCST90027468	8	2109442	0.0301213	3.22e-07	7738	0.00336431	7738	1.57878e-07	244562	TRUE	5.92329e-07	0.0106682	83.4189	42.2042	26.1142
rs6916769	G	T	G	T	-0.142408	-0.000241708	0.298281	0.3262	75992801	0.977256	0.00847823	244562	GCST90027468	6	76702518	0.0314154	5.81e-06	7738	0.0026492	7738	3.32342e-09	244562	TRUE	8.35887e-06	0.00848961	66.2379	42.2042	20.5487
rs7461966	G	C	G	C	0.196781	-0.0182755	0.117127	0.1002	87728836	0.14789	0.0126297	244562	GCST90027468	8	88741064	0.0439708	7.63e-06	7738	0.00258225	7738	8.56175e-06	244562	TRUE	3.31638e-05	0.00800851	62.454	42.2042	20.028
rs9288803	C	T	C	T	-0.138405	0.00581422	0.404818	0.4162	105413164	0.458926	0.00785051	244562	GCST90027468	3	105132008	0.0294732	2.65e-06	7738	0.00284247	7738	2.24285e-06	244562	TRUE	7.08085e-06	0.00923088	72.0754	42.2042	22.0521
rs1273560	G	A	G	A	0.0928482	-0.0038557	0.233308	0.2249	197824169	0.669846	0.00904331	244562	GCST90027469	3	197551040	0.0207781	7.87e-06	7738	0.00257454	7738	7.43303e-07	244562	TRUE	1.54132e-05	0.00308409	23.9324	42.2042	19.968
rs12859492	C	T	C	T	0.0832796	0.00118713	0.30745	0.2812	71331420	0.884379	0.00816344	244562	GCST90027469	13	71905552	0.0178178	2.95e-06	7738	0.00281597	7738	8.64699e-08	244562	TRUE	4.78898e-06	0.00295347	22.9157	42.2042	21.8459
rs2972891	G	A	G	A	0.0723683	0.0126774	0.516623	0.5573	18234220	0.0991037	0.00768693	244562	GCST90027469	5	18234329	0.0161718	7.64e-06	7738	0.00258191	7738	1.11215e-05	244562	TRUE	3.87376e-05	0.00261569	20.2881	42.2042	20.0253
rs4472353	C	T	C	T	0.0987951	-0.0105511	0.822923	0.8558	95630950	0.40613	0.0127011	244562	GCST90027469	6	96078826	0.0213109	3.55e-06	7738	0.00277042	7738	2.8218e-06	244562	TRUE	1.00351e-05	0.00284461	22.0687	42.2042	21.4915
rs56210724	C	T	C	T	0.131657	0.022353	0.093528	0.07771	14898006	0.115407	0.0141983	244562	GCST90027469	21	16270327	0.0293572	7.3e-06	7738	0.00259307	7738	1.01347e-05	244562	TRUE	3.51082e-05	0.0029391	22.8039	42.2042	20.1122
rs5756419	A	T	A	T	0.0844728	0.0140668	0.293243	0.3119	36950253	0.0877183	0.00823796	244562	GCST90027469	22	37346295	0.0178876	2.33e-06	7738	0.0028745	7738	1.19223e-05	244562	TRUE	1.37416e-05	0.00295775	22.949	42.2042	22.3013
rs6065218	G	A	G	A	0.122387	0.00416444	0.148047	0.182	40234135	0.729446	0.0120407	244562	GCST90027469	20	38862775	0.0260522	2.63e-06	7738	0.00284465	7738	4.89127e-07	244562	TRUE	5.06367e-06	0.00377847	29.3411	42.2042	22.069
rs79676117	C	A	C	A	-0.171166	-0.0117346	0.0501703	0.04499	51799422	0.48184	0.016684	244562	GCST90027469	20	50415961	0.0373321	4.54e-06	7738	0.00271004	7738	2.0228e-06	244562	TRUE	1.14063e-05	0.00279227	21.6615	42.2042	21.0218
rs8079753	A	G	A	G	0.0964075	0.00336952	0.24166	0.2096	61475088	0.708877	0.00902474	244562	GCST90027469	17	59552449	0.0192844	5.76e-07	7738	0.00322027	7738	5.70008e-07	244562	TRUE	1.21193e-06	0.00340659	26.4435	42.2042	24.9925
rs920917	C	A	C	A	0.110506	0.0120708	0.134139	0.1483	58396279	0.241018	0.0102954	244562	GCST90027469	15	58688478	0.0239977	4.13e-06	7738	0.00273355	7738	5.6208e-06	244562	TRUE	1.51795e-05	0.00283664	22.0067	42.2042	21.2047
rs12191883	C	T	C	T	0.0832945	0.00175174	0.476724	0.4233	123832133	0.8207	0.00772901	244562	GCST90027470	6	124153278	0.0180977	4.17e-06	7738	0.00273075	7738	2.10042e-07	244562	TRUE	7.14422e-06	0.00346147	26.8709	42.2042	21.1829
rs1716276	T	A	T	A	0.0929155	0.00135793	0.791532	0.7955	49241738	0.893404	0.0101339	244562	GCST90027470	19	49744995	0.0200474	3.57e-06	7738	0.00276911	7738	7.34197e-08	244562	TRUE	5.69729e-06	0.00284914	22.1039	42.2042	21.4813
rs1827616	C	T	C	T	0.07341	0.0109482	0.507147	0.5337	18235067	0.154922	0.00769721	244562	GCST90027470	5	18235176	0.0161052	5.16e-06	7738	0.00267853	7738	8.27236e-06	244562	TRUE	2.2714e-05	0.00269396	20.8968	42.2042	20.7768
rs4472353	C	T	C	T	0.0973552	-0.0105511	0.822923	0.8558	95630950	0.40613	0.0127011	244562	GCST90027470	6	96078826	0.0212612	4.67e-06	7738	0.00270303	7738	2.8218e-06	244562	TRUE	1.29773e-05	0.00276229	21.4283	42.2042	20.9673
rs7872938	A	G	A	G	-0.0725357	0.00992406	0.551324	0.5675	70562587	0.213468	0.00797699	244562	GCST90027470	9	73177503	0.0161592	7.16e-06	7738	0.00259787	7738	6.32867e-06	244562	TRUE	2.67581e-05	0.002603	20.1893	42.2042	20.1495
rs8080416	C	T	C	T	0.0876717	0.00633825	0.255869	0.227	61474977	0.47694	0.00891164	244562	GCST90027470	17	59552338	0.0187876	3.06e-06	7738	0.00280698	7738	2.06841e-06	244562	TRUE	7.91789e-06	0.00292695	22.7094	42.2042	21.7759
rs11211643	G	A	G	A	0.0831748	-0.000504128	0.51565	0.5378	1398816	0.947625	0.0076744	244562	GCST90027471	2	1402588	0.0163098	3.4e-07	7738	0.00335052	7738	1.76444e-08	244562	TRUE	5.54967e-07	0.00345563	26.8255	42.2042	26.0068
rs13193692	T	G	T	G	0.085911	0.00741858	0.230994	0.2301	125758786	0.380684	0.00846255	244562	GCST90027471	6	126079932	0.0193355	8.86e-06	7738	0.00254544	7738	3.14234e-06	244562	TRUE	2.455e-05	0.00262215	20.3383	42.2042	19.7418
rs2467707	C	T	C	T	0.121636	0.018653	0.890023	0.8814	25684350	0.152875	0.0130491	244562	GCST90027471	8	25541866	0.0256176	2.05e-06	7738	0.00290581	7738	8.35504e-06	244562	TRUE	9.78234e-06	0.00289639	22.4716	42.2042	22.5449
rs5756419	A	T	A	T	0.0829004	0.0140668	0.293243	0.3119	36950253	0.0877183	0.00823796	244562	GCST90027471	22	37346295	0.0178465	3.4e-06	7738	0.00278151	7738	1.19223e-05	244562	TRUE	1.93707e-05	0.00284866	22.1002	42.2042	21.5778
rs74949229	A	G	A	G	-0.144988	0.0206607	0.0938701	0.06442	9484983	0.188133	0.0156982	244562	GCST90027471	10	9526946	0.0283792	3.24e-07	7738	0.00336267	7738	7.08278e-06	244562	TRUE	1.61518e-06	0.00357612	27.7641	42.2042	26.1014
rs75967282	C	G	C	G	-0.18223	-0.00382876	0.0513866	0.07873	61443077	0.728479	0.0110291	244562	GCST90027471	17	59520438	0.0378294	1.46e-06	7738	0.00299064	7738	4.92774e-07	244562	TRUE	2.8789e-06	0.00323749	25.1266	42.2042	23.205
rs9445542	T	C	T	C	-0.116241	-0.0062523	0.126577	0.1268	65412164	0.604161	0.0120602	244562	GCST90027471	6	66122057	0.0244585	2.01e-06	7738	0.00291123	7738	1.09898e-06	244562	TRUE	4.52231e-06	0.00298764	23.1816	42.2042	22.587
rs2236141	T	C	T	C	0.19862	0.0370465	0.125015	0.1339	28741882	0.00268918	0.0123439	244562	GCST90027472	22	29137870	0.0422383	2.57e-06	7738	0.00285021	7738	3.68289e-05	244562	TRUE	4.1008e-05	0.00863055	67.3472	42.2042	22.1123
rs4557268	T	A	T	A	-0.153813	-0.00104715	0.763887	0.7914	39011644	0.909807	0.00924375	244562	GCST90027472	4	39013264	0.0345757	8.64e-06	7738	0.00255163	7738	5.2473e-08	244562	TRUE	1.31329e-05	0.00853424	66.5892	42.2042	19.7899
rs79950843	G	C	G	C	0.282755	0.00657579	0.0652969	0.04806	33310910	0.626751	0.0135219	244562	GCST90027472	11	33332456	0.0614621	4.22e-06	7738	0.00272837	7738	9.67011e-07	244562	TRUE	8.91677e-06	0.00975926	76.2417	42.2042	21.1644
rs10866460	T	C	T	C	-0.0846938	0.00140651	0.393209	0.316	58421938	0.866844	0.00838863	244562	GCST90027473	4	59288104	0.0168551	5.04e-07	7738	0.00325319	7738	1.14952e-07	244562	TRUE	8.88614e-07	0.00342291	26.5706	42.2042	25.2488
rs117665320	A	G	A	G	-0.19331	0.0238475	0.0631703	0.05112	34684972	0.256806	0.02103	244562	GCST90027473	19	35175877	0.0361138	8.66e-08	7738	0.00369012	7738	5.25796e-06	244562	TRUE	4.0209e-07	0.00442295	34.368	42.2042	28.6525
rs75506401	C	T	C	T	-0.150857	-0.0142963	0.0687763	0.04499	70989651	0.496052	0.0210019	244562	GCST90027473	3	71038802	0.0326449	3.82e-06	7738	0.00275288	7738	1.89472e-06	244562	TRUE	9.50293e-06	0.0029151	22.6172	42.2042	21.355
rs77004407	A	C	A	C	0.1793	-0.0308776	0.0531697	0.03272	31646022	0.0422844	0.0152053	244562	GCST90027473	14	32115228	0.036777	1.09e-06	7738	0.00306309	7738	1.68618e-05	244562	TRUE	8.92593e-06	0.00323688	25.1218	42.2042	23.7688
rs1250593	A	G	A	G	0.111221	0.0107632	0.691906	0.68	79235799	0.205627	0.00850387	244562	GCST90027474	10	80995556	0.0246672	6.52e-06	7738	0.00262106	7738	6.55029e-06	244562	TRUE	2.49378e-05	0.00527392	41.0154	42.2042	20.3298
rs13403023	C	G	C	G	-0.130473	0.00145139	0.222549	0.2546	105182260	0.867831	0.00872155	244562	GCST90027474	2	105798717	0.0274844	2.06e-06	7738	0.00290462	7738	1.13239e-07	244562	TRUE	3.4485e-06	0.00589074	45.8408	42.2042	22.5356
rs17097518	G	A	G	A	0.193953	-0.00953109	0.0766726	0.07771	47040358	0.537162	0.0154447	244562	GCST90027474	12	47434141	0.0436641	8.92e-06	7738	0.00254402	7738	1.55718e-06	244562	TRUE	2.01594e-05	0.00532622	41.4243	42.2042	19.7308
rs2449502	T	G	T	G	0.153883	-0.0303144	0.14791	0.1421	97787690	0.0359932	0.0144561	244562	GCST90027474	8	98799918	0.0333731	4.01e-06	7738	0.00274082	7738	1.79806e-05	244562	TRUE	3.0432e-05	0.0059689	46.4527	42.2042	21.2612
rs2723521	C	T	C	T	0.115642	0.00994363	0.630932	0.635	17774027	0.207864	0.00789515	244562	GCST90027474	7	17813651	0.0239472	1.37e-06	7738	0.00300537	7738	6.48606e-06	244562	TRUE	5.86441e-06	0.00622802	48.4819	42.2042	23.3196
rs4747915	A	T	A	T	0.111955	-0.00471225	0.330399	0.3231	11476096	0.580456	0.00852558	244562	GCST90027474	10	11518095	0.0247343	6e-06	7738	0.00264133	7738	1.24917e-06	244562	TRUE	1.31647e-05	0.0055459	43.1423	42.2042	20.4874
rs72700025	A	G	A	G	0.172204	0.00354096	0.106642	0.09407	24049519	0.723151	0.00999563	244562	GCST90027474	9	24049517	0.0370412	3.34e-06	7738	0.00278605	7738	5.1314e-07	244562	TRUE	6.40037e-06	0.00565028	43.959	42.2042	21.6131
rs76562182	A	G	A	G	-0.203736	-0.00462431	0.0693061	0.06851	108579837	0.8021	0.0184507	244562	GCST90027474	13	109232185	0.0451874	6.52e-06	7738	0.00262087	7738	2.56851e-07	244562	TRUE	1.11836e-05	0.00535481	41.6478	42.2042	20.3283
rs10170790	T	C	T	C	-0.0855325	-0.00232923	0.552267	0.5593	5375412	0.771726	0.00802856	244562	GCST90027475	2	5515545	0.019134	7.82e-06	7738	0.0025764	7738	3.44163e-07	244562	TRUE	1.37291e-05	0.00361793	28.09	42.2042	19.9825
rs115001375	C	T	C	T	-0.175844	0.00736482	0.0755566	0.07566	82553043	0.634886	0.0155094	244562	GCST90027475	1	83018726	0.0352956	6.29e-07	7738	0.00319821	7738	9.22035e-07	244562	TRUE	1.44287e-06	0.00431954	33.561	42.2042	24.8207
rs1576166	T	C	T	C	0.0903842	0.00555161	0.560505	0.5235	109535894	0.474972	0.00777087	244562	GCST90027475	13	110188241	0.0201903	7.58e-06	7738	0.0025838	7738	2.08695e-06	244562	TRUE	1.86741e-05	0.00402484	31.262	42.2042	20.0401
rs2056101	T	C	T	C	0.0909124	-0.00829901	0.535799	0.5767	11069694	0.293561	0.00790125	244562	GCST90027475	2	11209820	0.0188903	1.49e-06	7738	0.00298506	7738	4.51101e-06	244562	TRUE	5.32083e-06	0.00411135	31.9367	42.2042	23.1616
rs35098678	G	T	G	T	-0.116245	0.0111058	0.170274	0.2025	46070318	0.320387	0.0111766	244562	GCST90027475	21	47490232	0.0261238	8.6e-06	7738	0.00255299	7738	4.0373e-06	244562	TRUE	2.61204e-05	0.00381823	29.651	42.2042	19.8005
rs35296932	G	A	G	A	-0.102628	-0.00905414	0.242946	0.2219	41007610	0.285809	0.00848274	244562	GCST90027475	3	41049101	0.0223393	4.35e-06	7738	0.00272078	7738	4.65838e-06	244562	TRUE	1.46526e-05	0.00387435	30.0885	42.2042	21.1054
rs35902953	C	T	C	T	-0.110677	-0.00562403	0.176468	0.1943	100132864	0.62291	0.0114372	244562	GCST90027475	15	100673069	0.0246929	7.39e-06	7738	0.00259017	7738	9.88708e-07	244562	TRUE	1.52807e-05	0.00356034	27.6412	42.2042	20.0896
rs41474647	T	C	T	C	0.127405	0.00586026	0.136106	0.1769	125065410	0.494272	0.00857352	244562	GCST90027475	12	125549956	0.0271228	2.64e-06	7738	0.00284414	7738	1.91042e-06	244562	TRUE	6.7129e-06	0.00381716	29.6427	42.2042	22.065
rs59657730	G	A	G	A	0.110105	-0.000167349	0.559955	0.4898	46454988	0.983042	0.00787328	244562	GCST90027475	6	46422725	0.0199672	3.5e-08	7738	0.00391525	7738	1.84735e-09	244562	TRUE	5.91069e-08	0.0059744	46.4957	42.2042	30.4074
rs738153	T	A	T	A	0.187256	0.0122187	0.0581388	0.04806	27129676	0.441678	0.0158816	244562	GCST90027475	22	27525638	0.0422665	9.41e-06	7738	0.00253082	7738	2.42034e-06	244562	TRUE	2.38851e-05	0.00384021	29.8224	42.2042	19.6281
rs978052	T	A	T	A	0.14247	-0.00987155	0.104279	0.1074	31017240	0.366857	0.0109395	244562	GCST90027475	19	31508146	0.0316872	6.92e-06	7738	0.00260633	7738	3.32957e-06	244562	TRUE	1.98596e-05	0.00379181	29.4451	42.2042	20.2153
rs10460443	A	G	A	G	0.10428	-2.47e-05	0.789414	0.7832	240149850	0.997928	0.00951607	244562	GCST90027476	2	241089267	0.0224112	3.27e-06	7738	0.00279088	7738	2.75482e-11	244562	TRUE	4.68853e-06	0.00361548	28.0709	42.2042	21.6507
rs10514997	T	C	T	C	-0.15594	0.00945168	0.0567666	0.08078	52221661	0.40346	0.0113132	244562	GCST90027476	17	50299021	0.0350463	8.61e-06	7738	0.00255273	7738	2.85406e-06	244562	TRUE	2.31243e-05	0.0026041	20.1979	42.2042	19.7984
rs115668747	G	T	G	T	-0.169625	-0.00694854	0.0571408	0.03885	155189644	0.751071	0.021904	244562	GCST90027476	3	154907433	0.037591	6.41e-06	7738	0.00262515	7738	4.11487e-07	244562	TRUE	1.16042e-05	0.00310029	24.0585	42.2042	20.3616
rs17746902	T	G	T	G	-0.0880821	0.00929099	0.660202	0.6697	22634467	0.248908	0.00805806	244562	GCST90027476	8	22491980	0.0172082	3.08e-07	7738	0.00337536	7738	5.43595e-06	244562	TRUE	1.33491e-06	0.00348099	27.023	42.2042	26.2002
rs2064592	T	G	T	G	-0.0742577	0.00175158	0.632553	0.6176	56609721	0.823856	0.00786915	244562	GCST90027476	6	56474519	0.0166735	8.44e-06	7738	0.00255741	7738	2.0259e-07	244562	TRUE	1.401e-05	0.00256333	19.8809	42.2042	19.8349
rs2452966	T	C	T	C	0.078063	-0.0147769	0.66551	0.5982	92027860	0.0555188	0.00771723	244562	GCST90027476	6	92737578	0.0172351	5.92e-06	7738	0.00264482	7738	1.49917e-05	244562	TRUE	3.75918e-05	0.00271305	21.0453	42.2042	20.5146
rs2698174	A	G	A	G	0.162424	-0.0179975	0.945871	0.9407	71078874	0.331784	0.0185441	244562	GCST90027476	18	68746110	0.0362775	7.56e-06	7738	0.00258455	7738	3.85148e-06	244562	TRUE	2.27561e-05	0.00270142	20.9548	42.2042	20.0459
rs297276	T	G	T	G	0.0740137	-0.0149656	0.364924	0.3732	27645542	0.0619584	0.0080176	244562	GCST90027476	4	27647164	0.0167416	9.83e-06	7738	0.0025201	7738	1.42465e-05	244562	TRUE	5.729e-05	0.00253911	19.6926	42.2042	19.5448
rs4530151	C	T	C	T	-0.0775274	0.00248127	0.558291	0.5481	77938571	0.75158	0.00783831	244562	GCST90027476	16	77972468	0.0171934	6.51e-06	7738	0.00262138	7738	4.09748e-07	244562	TRUE	1.17692e-05	0.0029644	23.0008	42.2042	20.3323
rs56963659	T	C	T	C	0.123668	-0.0203223	0.0944416	0.09714	133483072	0.124317	0.0132229	244562	GCST90027476	9	136348194	0.0279319	9.53e-06	7738	0.00252754	7738	9.65836e-06	244562	TRUE	4.35374e-05	0.00261592	20.2898	42.2042	19.6026
rs61295363	A	T	A	T	0.156802	0.0151025	0.0652665	0.0726	89917391	0.416416	0.0185842	244562	GCST90027476	1	90382950	0.0329529	1.95e-06	7738	0.0029183	7738	2.70038e-06	244562	TRUE	5.62597e-06	0.00299993	23.2773	42.2042	22.6421
rs7206354	C	A	C	A	0.0784659	-0.00521335	0.343727	0.3528	54696952	0.527639	0.00825401	244562	GCST90027476	16	54730864	0.0174082	6.56e-06	7738	0.00261938	7738	1.63124e-06	244562	TRUE	1.52562e-05	0.00277773	21.5484	42.2042	20.3167
rs10166293	A	G	A	G	0.130987	0.0110723	0.451165	0.502	51777872	0.150739	0.00770555	244562	GCST90027477	2	52005010	0.02854	4.44e-06	7738	0.00271551	7738	8.44267e-06	244562	TRUE	2.00125e-05	0.00849696	66.2958	42.2042	21.0644
rs2514587	A	G	A	G	0.133181	0.00860084	0.629148	0.6595	118587453	0.31716	0.00859817	244562	GCST90027477	8	119599692	0.0298082	7.9e-06	7738	0.00257382	7738	4.0915e-06	244562	TRUE	2.42592e-05	0.00827691	64.5645	42.2042	19.9624
rs34317346	A	G	A	G	0.285613	-0.0137664	0.0582946	0.04192	28477520	0.423251	0.0171909	244562	GCST90027477	12	28630453	0.062907	5.62e-06	7738	0.00265758	7738	2.62213e-06	244562	TRUE	1.50733e-05	0.00895631	69.9122	42.2042	20.6138
rs3781339	T	C	T	C	0.166232	0.0227226	0.187134	0.2065	103668394	0.011165	0.00895475	244562	GCST90027477	10	105428152	0.0362705	4.58e-06	7738	0.00270787	7738	2.63277e-05	244562	TRUE	4.78922e-05	0.0084068	65.5864	42.2042	21.005
rs4332610	A	G	A	G	-0.124159	-0.00326327	0.514629	0.5542	70887069	0.670502	0.00767	244562	GCST90027477	12	71280849	0.027764	7.75e-06	7738	0.00257843	7738	7.40167e-07	244562	TRUE	1.51717e-05	0.00770113	60.0383	42.2042	19.9983
rs61802172	A	G	A	G	0.18177	0.0146529	0.149788	0.1656	86082986	0.168313	0.0106362	244562	GCST90027477	1	86548669	0.0400524	5.67e-06	7738	0.00265532	7738	7.76043e-06	244562	TRUE	2.39253e-05	0.00841548	65.6546	42.2042	20.5962
rs61861701	G	A	G	A	0.159157	0.010727	0.257808	0.1851	110605246	0.28151	0.00996069	244562	GCST90027477	10	112365004	0.0335114	2.04e-06	7738	0.00290727	7738	4.74231e-06	244562	TRUE	7.2972e-06	0.0096938	75.7253	42.2042	22.5562
rs72822615	T	C	T	C	0.183866	-7.8e-05	0.172729	0.1595	168315378	0.992842	0.00869069	244562	GCST90027477	5	167742383	0.0372448	7.95e-07	7738	0.00314043	7738	3.29378e-10	244562	TRUE	1.19787e-06	0.00966153	75.4708	42.2042	24.3709
rs72943027	G	T	G	T	0.189798	-0.0058797	0.134399	0.1575	105254277	0.591995	0.0109707	244562	GCST90027477	2	105870734	0.0429028	9.69e-06	7738	0.00252347	7738	1.17451e-06	244562	TRUE	2.04788e-05	0.0083816	65.3881	42.2042	19.571
rs73024197	A	C	A	C	-0.210026	0.0170366	0.116768	0.1012	29672107	0.169834	0.0124107	244562	GCST90027477	19	30163014	0.0444604	2.31e-06	7738	0.00287629	7738	7.70524e-06	244562	TRUE	1.04321e-05	0.0090986	71.0331	42.2042	22.3151
rs7776094	A	C	A	C	-0.242195	0.038451	0.0742795	0.05521	82902197	0.109766	0.0240432	244562	GCST90027477	6	83611916	0.0536335	6.31e-06	7738	0.00262905	7738	1.04578e-05	244562	TRUE	3.13104e-05	0.00806695	62.9134	42.2042	20.3919
rs10814610	T	C	T	C	-0.164834	0.00282163	0.151425	0.1984	3781877	0.791936	0.0106962	244562	GCST90027478	9	3781877	0.033329	7.59e-07	7738	0.00315182	7738	2.84548e-07	244562	TRUE	1.4342e-06	0.00698251	54.3965	42.2042	24.4596
rs12698863	A	T	A	T	-0.136533	0.0030426	0.154424	0.1431	70169252	0.773466	0.0105703	244562	GCST90027478	7	69634238	0.0304116	7.14e-06	7738	0.00259866	7738	3.38789e-07	244562	TRUE	1.25651e-05	0.00486825	37.845	42.2042	20.1556
rs13214578	C	T	C	T	0.136276	0.00538999	0.829373	0.817	43734136	0.564206	0.0093478	244562	GCST90027478	6	43701873	0.0292969	3.29e-06	7738	0.00278911	7738	1.35948e-06	244562	TRUE	7.59475e-06	0.00525613	40.8763	42.2042	21.6369
rs16851440	C	T	C	T	-0.0995905	-0.000380712	0.562248	0.5746	105685187	0.960445	0.00767639	244562	GCST90027478	3	105404031	0.0222116	7.34e-06	7738	0.00259199	7738	1.00576e-08	244562	TRUE	1.06484e-05	0.00488227	37.9546	42.2042	20.1037
rs34039849	A	G	A	G	0.169988	-0.0227404	0.0923128	0.0593	130241267	0.117116	0.0145121	244562	GCST90027478	5	129576960	0.0383437	9.28e-06	7738	0.00253414	7738	1.00403e-05	244562	TRUE	4.34582e-05	0.00484244	37.6434	42.2042	19.6539
rs4302037	T	C	T	C	0.105	-0.00485927	0.537511	0.5613	25474904	0.534859	0.00782988	244562	GCST90027478	16	25486225	0.02272	3.81e-06	7738	0.00275327	7738	1.57487e-06	244562	TRUE	9.03641e-06	0.00548147	42.6384	42.2042	21.3581
rs57224868	A	G	A	G	0.120247	-0.00202263	0.780381	0.7863	11878788	0.8272	0.00926562	244562	GCST90027478	18	11878787	0.0270269	8.62e-06	7738	0.00255229	7738	1.94849e-07	244562	TRUE	1.42447e-05	0.00495627	38.5327	42.2042	19.795
rs5998901	C	T	C	T	0.160175	0.00878557	0.136341	0.1166	33381273	0.533527	0.0141104	244562	GCST90027478	22	33777259	0.0325027	8.31e-07	7738	0.00312949	7738	1.58517e-06	244562	TRUE	2.13664e-06	0.0060421	47.0259	42.2042	24.2857
rs61861334	C	T	C	T	-0.147413	0.0152882	0.16831	0.1697	104207417	0.149423	0.0106052	244562	GCST90027478	10	105967175	0.0316697	3.24e-06	7738	0.00279288	7738	8.49736e-06	244562	TRUE	1.50506e-05	0.00608377	47.3521	42.2042	21.6662
rs7302060	C	T	C	T	-0.0995836	0.00453918	0.387103	0.3967	56435308	0.56744	0.00793805	244562	GCST90027478	12	56829092	0.0223424	8.31e-06	7738	0.00256145	7738	1.33703e-06	244562	TRUE	1.81905e-05	0.00470565	36.575	42.2042	19.8663
rs9939420	G	A	G	A	-0.181884	-0.0115378	0.0825379	0.091	12006110	0.388035	0.0133665	244562	GCST90027478	16	12099967	0.0405889	7.43e-06	7738	0.002589	7738	3.04665e-06	244562	TRUE	2.05741e-05	0.00501026	38.9546	42.2042	20.0805
rs9957998	G	A	G	A	0.102662	0.00170429	0.444744	0.4346	5294187	0.827084	0.00780199	244562	GCST90027478	18	5294186	0.0221672	3.63e-06	7738	0.0027649	7738	1.95115e-07	244562	TRUE	6.2114e-06	0.00520538	40.4796	42.2042	21.4485
rs10423929	T	C	T	C	-0.0942771	0.00867292	0.241406	0.2229	48833306	0.3517	0.00931273	244562	GCST90027479	19	49336563	0.0208513	6.14e-06	7738	0.00263562	7738	3.54641e-06	244562	TRUE	1.81723e-05	0.00325537	25.2658	42.2042	20.4431
rs10520466	C	T	C	T	0.135971	-0.00437475	0.077256	0.08691	181150932	0.717399	0.012087	244562	GCST90027479	4	182072085	0.0307593	9.85e-06	7738	0.00251958	7738	5.35649e-07	244562	TRUE	1.8134e-05	0.00263594	20.4455	42.2042	19.5407
rs1596848	A	G	A	G	-0.0782205	0.00721884	0.455036	0.4939	25016733	0.346242	0.0076641	244562	GCST90027479	11	25038279	0.0164145	1.89e-06	7738	0.00292682	7738	3.62765e-06	244562	TRUE	6.06265e-06	0.00303448	23.5462	42.2042	22.7084
rs1679174	C	T	C	T	-0.0908743	0.0199019	0.802993	0.7873	138461001	0.0402522	0.00970279	244562	GCST90027479	3	138179843	0.0205552	9.82e-06	7738	0.00252015	7738	1.72029e-05	244562	TRUE	6.56758e-05	0.0026128	20.2655	42.2042	19.5451
rs169651	A	G	A	G	-0.0767839	-0.0091971	0.438577	0.4162	74110034	0.237447	0.00778497	244562	GCST90027479	5	73405859	0.0165063	3.29e-06	7738	0.0027894	7738	5.7069e-06	244562	TRUE	1.2388e-05	0.0029034	22.5261	42.2042	21.6392
rs2096694	T	C	T	C	0.0831726	0.0133961	0.297591	0.3129	33999481	0.11351	0.00846455	244562	GCST90027479	21	35371782	0.0178355	3.11e-06	7738	0.0028032	7738	1.02414e-05	244562	TRUE	1.61988e-05	0.00289201	22.4375	42.2042	21.7465
rs211508	G	C	G	C	-0.0911261	0.00958611	0.228632	0.2372	74392033	0.328064	0.00980154	244562	GCST90027479	5	73687858	0.0195983	3.32e-06	7738	0.00278689	7738	3.91119e-06	244562	TRUE	1.0618e-05	0.00292897	22.725	42.2042	21.6197
rs4619111	T	C	T	C	0.0777406	-0.00326431	0.410206	0.3906	93640343	0.682703	0.00798554	244562	GCST90027479	11	93373509	0.0166061	2.85e-06	7738	0.00282498	7738	6.83263e-07	244562	TRUE	5.75817e-06	0.00292434	22.6891	42.2042	21.916
rs4810354	A	G	A	G	-0.08765	0.0199727	0.727368	0.726	42357871	0.0242845	0.00886652	244562	GCST90027479	20	40986511	0.0189889	3.91e-06	7738	0.00274659	7738	2.07478e-05	244562	TRUE	3.3576e-05	0.00304695	23.6432	42.2042	21.3061
rs61775945	T	C	T	C	0.153936	0.0032339	0.070895	0.08078	62639718	0.84848	0.0169263	244562	GCST90027479	1	63105389	0.0330242	3.14e-06	7738	0.00280079	7738	1.49261e-07	244562	TRUE	5.27852e-06	0.0031217	24.2251	42.2042	21.7278
rs62104460	T	C	T	C	0.132019	0.00435901	0.100914	0.1196	2877316	0.696277	0.0111669	244562	GCST90027479	2	2881088	0.0280991	2.62e-06	7738	0.00284534	7738	6.23053e-07	244562	TRUE	5.24086e-06	0.00316268	24.5441	42.2042	22.0744
rs713716	A	G	A	G	-0.0864109	0.0214383	0.251488	0.2495	46475197	0.031335	0.00995837	244562	GCST90027479	22	46871094	0.0187812	4.21e-06	7738	0.0027289	7738	1.89501e-05	244562	TRUE	3.31681e-05	0.00281114	21.8083	42.2042	21.1685
rs9865200	G	C	G	C	0.092737	0.0013106	0.805664	0.7914	4553976	0.887064	0.00922826	244562	GCST90027479	3	4595660	0.0209477	9.55e-06	7738	0.00252707	7738	8.24736e-08	244562	TRUE	1.47967e-05	0.00269304	20.8896	42.2042	19.599
rs13129779	T	C	T	C	0.0732744	0.00371328	0.491405	0.5164	168804876	0.629786	0.00770345	244562	GCST90027480	4	169726027	0.0164733	8.66e-06	7738	0.00255104	7738	9.50077e-07	244562	TRUE	1.7643e-05	0.00268378	20.8176	42.2042	19.7853
rs1479994	C	G	C	G	0.0819165	0.00883501	0.296866	0.2873	22079953	0.321385	0.00890971	244562	GCST90027480	3	22121445	0.018018	5.46e-06	7738	0.00266474	7738	4.02068e-06	244562	TRUE	1.70623e-05	0.00280138	21.7323	42.2042	20.6695
rs2208125	G	A	G	A	0.0774429	0.0110016	0.375845	0.3701	14543323	0.197179	0.00853082	244562	GCST90027480	20	14523969	0.0168241	4.16e-06	7738	0.00273146	7738	6.80052e-06	244562	TRUE	1.67883e-05	0.00281381	21.829	42.2042	21.1885
rs4400672	C	T	C	T	-0.0818249	-0.00350193	0.321899	0.362	202706266	0.658842	0.00793167	244562	GCST90027480	1	202675394	0.0179244	5e-06	7738	0.00268656	7738	7.97077e-07	244562	TRUE	1.01073e-05	0.00292291	22.6779	42.2042	20.8392
rs55920379	G	A	G	A	-0.165347	0.0308785	0.0677707	0.07566	182117950	0.0494869	0.0157193	244562	GCST90027480	1	182087085	0.0350184	2.34e-06	7738	0.00287365	7738	1.57781e-05	244562	TRUE	1.69041e-05	0.00345452	26.8168	42.2042	22.2946
rs73099859	G	A	G	A	-0.158737	-0.00057117	0.0727707	0.05624	77427817	0.973778	0.0173765	244562	GCST90027480	3	77476968	0.0331685	1.7e-06	7738	0.00295192	7738	4.41797e-09	244562	TRUE	2.55789e-06	0.0034004	26.3953	42.2042	22.9036
rs76367474	A	T	A	T	0.172732	0.0216392	0.0605027	0.07157	5020186	0.0710133	0.0119859	244562	GCST90027480	3	5061871	0.0382502	6.31e-06	7738	0.00262917	7738	1.33276e-05	244562	TRUE	3.66366e-05	0.00339192	26.3292	42.2042	20.3929
rs79035992	A	G	A	G	0.162906	0.0114233	0.0562931	0.06033	75829088	0.540792	0.0186772	244562	GCST90027480	13	76403224	0.0354128	4.22e-06	7738	0.00272804	7738	1.52958e-06	244562	TRUE	9.88436e-06	0.00281966	21.8746	42.2042	21.1618
rs9516950	A	G	A	G	-0.15886	-0.0346532	0.057972	0.02249	97497612	0.22317	0.0284476	244562	GCST90027480	13	98149866	0.0356407	8.3e-06	7738	0.00256157	7738	6.06747e-06	244562	TRUE	3.00676e-05	0.00275639	21.3824	42.2042	19.8672
rs11948304	A	G	A	G	0.0846347	0.0205931	0.27158	0.3067	14110939	0.0213988	0.00895012	244562	GCST90027481	5	14111048	0.0182383	3.48e-06	7738	0.0027759	7738	2.16466e-05	244562	TRUE	3.13379e-05	0.00283404	21.9865	42.2042	21.5342
rs12137024	A	G	A	G	0.118929	-0.00145976	0.169299	0.1933	94944302	0.888336	0.0103964	244562	GCST90027481	1	95409858	0.0215732	3.53e-08	7738	0.00391316	7738	8.06141e-08	244562	TRUE	6.69524e-08	0.00397837	30.8996	42.2042	30.3911
rs13010502	T	A	T	A	-0.139759	-0.00285305	0.927338	0.92945	3520445	0.817014	0.0123302	244562	GCST90027481	2	3524216	0.0315398	9.37e-06	7738	0.00253177	7738	2.18924e-07	244562	TRUE	1.5596e-05	0.0026323	20.4172	42.2042	19.6355
rs144371117	A	G	A	G	-0.165831	0.0162234	0.0616052	0.04908	79611557	0.277905	0.0149519	244562	GCST90027481	14	80077900	0.0374651	9.59e-06	7738	0.00252617	7738	4.81396e-06	244562	TRUE	3.10269e-05	0.00317954	24.6754	42.2042	19.5919
rs1501270	A	C	A	C	0.0905245	-0.00286196	0.253443	0.2321	104090012	0.749785	0.00897383	244562	GCST90027481	4	105011169	0.0187611	1.4e-06	7738	0.0030005	7738	4.15897e-07	244562	TRUE	2.70485e-06	0.00310103	24.0642	42.2042	23.2818
rs2175835	C	T	C	T	-0.145776	-0.00629922	0.0867975	0.06033	29418262	0.637087	0.0133522	244562	GCST90027481	8	29275779	0.0317273	4.33e-06	7738	0.00272148	7738	9.10092e-07	244562	TRUE	9.04952e-06	0.00336881	26.1492	42.2042	21.1109
rs3095927	C	G	C	G	0.158716	-0.0178312	0.105458	0.07464	6810473	0.378629	0.0202529	244562	GCST90027481	19	6810484	0.032277	8.78e-07	7738	0.0031159	7738	3.16955e-06	244562	TRUE	2.80845e-06	0.00475282	36.9434	42.2042	24.1799
rs6783574	G	T	G	T	0.0782697	-0.00704739	0.389026	0.3507	30733974	0.35863	0.00767707	244562	GCST90027481	3	30775466	0.0166922	2.75e-06	7738	0.00283407	7738	3.44571e-06	244562	TRUE	8.45434e-06	0.00291218	22.5944	42.2042	21.9867
rs76864278	G	T	G	T	-0.0838791	-0.00294764	0.271007	0.3078	14815183	0.726026	0.00841181	244562	GCST90027481	8	14672692	0.0185589	6.19e-06	7738	0.00263355	7738	5.02093e-07	244562	TRUE	1.15351e-05	0.00277998	21.5659	42.2042	20.4269
rs77982223	G	C	G	C	0.120951	0.0105793	0.105957	0.09407	130660783	0.437982	0.0136401	244562	GCST90027481	9	133536170	0.0266922	5.86e-06	7738	0.00264717	7738	2.45977e-06	244562	TRUE	1.53743e-05	0.00277164	21.501	42.2042	20.5329
rs10005886	G	T	G	T	0.13034	0.00623115	0.0920829	0.1043	154086473	0.528725	0.00989144	244562	GCST90027482	4	155007625	0.0284145	4.49e-06	7738	0.00271256	7738	1.62267e-06	244562	TRUE	1.06473e-05	0.0028406	22.0375	42.2042	21.0414
rs10143187	T	C	T	C	0.0939712	0.00298057	0.231992	0.2301	104314729	0.756072	0.00959484	244562	GCST90027482	14	104781066	0.0209327	7.15e-06	7738	0.00259832	7738	3.94582e-07	244562	TRUE	1.28139e-05	0.00314672	24.4199	42.2042	20.153
rs10772275	C	T	C	T	-0.0758565	0.00553421	0.454918	0.4407	10410993	0.472382	0.00770128	244562	GCST90027482	12	10563592	0.016285	3.19e-06	7738	0.0027969	7738	2.11154e-06	244562	TRUE	8.27912e-06	0.00285371	22.1395	42.2042	21.6975
rs11085939	T	C	T	C	-0.0794314	-0.00397135	0.316945	0.3016	15016630	0.675013	0.00947188	244562	GCST90027482	19	15127442	0.0174439	5.28e-06	7738	0.00267312	7738	7.18817e-07	244562	TRUE	1.04578e-05	0.00273183	21.1913	42.2042	20.7347
rs12098656	C	T	C	T	-0.170832	-0.00584221	0.0596567	0.05828	51604521	0.713612	0.0159184	244562	GCST90027482	10	53364281	0.036039	2.14e-06	7738	0.00289612	7738	5.50768e-07	244562	TRUE	4.22189e-06	0.00327427	25.4129	42.2042	22.4695
rs12153246	C	T	C	T	0.0875854	0.000817949	0.766015	0.727	91125681	0.928522	0.00911826	244562	GCST90027482	5	90421498	0.0196896	8.66e-06	7738	0.00255131	7738	3.29036e-08	244562	TRUE	1.29037e-05	0.00274991	21.332	42.2042	19.7874
rs6883971	A	G	A	G	-0.0732918	0.00406727	0.500646	0.4581	171909719	0.598489	0.00772401	244562	GCST90027482	5	171336723	0.0161665	5.8e-06	7738	0.00264978	7738	1.13379e-06	244562	TRUE	1.24783e-05	0.00268584	20.8336	42.2042	20.5532
rs7145596	T	C	T	C	-0.138166	-0.0181692	0.0823276	0.08384	28743894	0.13513	0.01216	244562	GCST90027482	14	29213100	0.0293574	2.52e-06	7738	0.00285502	7738	9.12879e-06	244562	TRUE	1.24528e-05	0.00288447	22.3788	42.2042	22.1497
rs72690382	G	T	G	T	-0.11284	-0.00961728	0.11954	0.138	23862133	0.438738	0.0124202	244562	GCST90027482	14	24331342	0.0249271	5.99e-06	7738	0.00264191	7738	2.45167e-06	244562	TRUE	1.56715e-05	0.00268027	20.7903	42.2042	20.4919
rs78778914	C	T	C	T	0.211625	-0.0297644	0.0527473	0.07566	150477225	0.0279795	0.0135442	244562	GCST90027482	1	150449701	0.0386425	4.34e-08	7738	0.00386195	7738	1.97466e-05	244562	TRUE	5.63665e-07	0.00447538	34.7772	42.2042	29.9919
rs10840754	A	T	A	T	0.139919	0.0185628	0.080491	0.07873	17571141	0.182283	0.0139177	244562	GCST90027483	12	17724075	0.0307321	5.29e-06	7738	0.00267233	7738	7.27387e-06	244562	TRUE	2.1694e-05	0.00289792	22.4835	42.2042	20.7285
rs112102053	A	G	A	G	0.110645	-0.00179558	0.131702	0.1544	113212441	0.839794	0.00888211	244562	GCST90027483	9	115974721	0.0245293	6.46e-06	7738	0.00262323	7738	1.67106e-07	244562	TRUE	1.0656e-05	0.00279998	21.7215	42.2042	20.3467
rs1348931	T	G	T	G	-0.0747997	0.000623077	0.368945	0.4018	63098954	0.936143	0.00777694	244562	GCST90027483	3	63084630	0.0169278	9.93e-06	7738	0.0025176	7738	2.6247e-08	244562	TRUE	1.46193e-05	0.0026053	20.2073	42.2042	19.5253
rs17048278	G	A	G	A	-0.0802746	-0.00565353	0.34117	0.3497	218603616	0.472127	0.0078628	244562	GCST90027483	1	218776958	0.017234	3.19e-06	7738	0.00279674	7738	2.11397e-06	244562	TRUE	8.2872e-06	0.00289688	22.4754	42.2042	21.6962
rs4802635	G	A	G	A	0.0729186	0.00540516	0.5517	0.5603	49898063	0.484016	0.00772322	244562	GCST90027483	19	50401320	0.0163449	8.15e-06	7738	0.00256614	7738	2.00278e-06	244562	TRUE	1.97572e-05	0.00263014	20.4004	42.2042	19.9027
rs4959131	T	C	T	C	0.113823	0.00124019	0.144531	0.1431	1409724	0.917852	0.0120244	244562	GCST90027483	6	1409959	0.0257369	9.75e-06	7738	0.00252194	7738	4.34978e-08	244562	TRUE	1.46381e-05	0.00320373	24.8637	42.2042	19.559
rs61945524	T	C	T	C	-0.0888739	0.00908982	0.299793	0.3057	33726332	0.263244	0.00812493	244562	GCST90027483	13	34300469	0.0182976	1.19e-06	7738	0.00304033	7738	5.1178e-06	244562	TRUE	4.57317e-06	0.00331609	25.7386	42.2042	23.5918
rs61994705	G	C	G	C	-0.0848608	0.00664459	0.39267	0.3712	24835745	0.397557	0.0078542	244562	GCST90027483	15	25080892	0.0168171	4.51e-07	7738	0.00328071	7738	2.92648e-06	244562	TRUE	1.45751e-06	0.00343476	26.6629	42.2042	25.4631
rs6913228	C	A	C	A	0.0811434	-0.0141501	0.321372	0.3681	135182912	0.0753304	0.00795643	244562	GCST90027483	6	135504050	0.0178159	5.25e-06	7738	0.00267431	7738	1.29328e-05	244562	TRUE	3.03934e-05	0.00287195	22.2814	42.2042	20.7439
rs10402683	C	G	C	G	0.119826	-0.0192554	0.142733	0.1656	48934108	0.139755	0.0130394	244562	GCST90027484	19	49437365	0.0263689	5.51e-06	7738	0.00266222	7738	8.91656e-06	244562	TRUE	2.51808e-05	0.00351376	27.2783	42.2042	20.6499
rs10447306	G	C	G	C	0.13798	0.0131	0.0731812	0.04806	178311164	0.440142	0.0169699	244562	GCST90027484	5	177738165	0.0310637	8.92e-06	7738	0.00254392	7738	2.43666e-06	244562	TRUE	2.27623e-05	0.0025826	20.0307	42.2042	19.7299
rs1073201	G	A	G	A	-0.0756411	0.00012344	0.485935	0.4888	11083502	0.987352	0.00778675	244562	GCST90027484	2	11223628	0.0165006	4.56e-06	7738	0.00270908	7738	1.02758e-09	244562	TRUE	6.53752e-06	0.00285852	22.1769	42.2042	21.0144
rs10882802	G	A	G	A	0.116194	-0.00109416	0.885574	0.8804	96491457	0.919044	0.0107653	244562	GCST90027484	10	98251214	0.025124	3.75e-06	7738	0.00275724	7738	4.22403e-08	244562	TRUE	5.81002e-06	0.00273619	21.2253	42.2042	21.389
rs112704675	T	C	T	C	0.137352	-0.01079	0.0839629	0.08384	21345992	0.457076	0.0145091	244562	GCST90027484	12	21498926	0.0293118	2.79e-06	7738	0.00283033	7738	2.26138e-06	244562	TRUE	7.43595e-06	0.00290202	22.5154	42.2042	21.9576
rs113884393	G	C	G	C	0.168368	0.0130581	0.0567687	0.02352	155290784	0.568002	0.022869	244562	GCST90027484	7	155082494	0.03564	2.31e-06	7738	0.00287658	7738	1.33316e-06	244562	TRUE	5.39948e-06	0.00303582	23.5566	42.2042	22.3174
rs12455185	T	C	T	C	0.0810826	-0.00856055	0.694565	0.6769	63352459	0.301228	0.00828063	244562	GCST90027484	18	61019692	0.0175717	3.94e-06	7738	0.00274484	7738	4.37007e-06	244562	TRUE	1.30235e-05	0.00278944	21.6395	42.2042	21.2926
rs157871	G	A	G	A	-0.112897	0.0335876	0.113871	0.1339	165422145	0.00413323	0.0117119	244562	GCST90027484	1	165391382	0.0251304	7.04e-06	7738	0.00260206	7738	3.3628e-05	244562	TRUE	8.9028e-05	0.0025722	19.9499	42.2042	20.1821
rs2007950	G	A	G	A	0.0741464	-0.00413249	0.622835	0.6012	43081723	0.591206	0.00769423	244562	GCST90027484	6	43049461	0.0165927	7.87e-06	7738	0.0025746	7738	1.17952e-06	244562	TRUE	1.68224e-05	0.00258294	20.0334	42.2042	19.9685
rs2304958	G	A	G	A	-0.0800054	0.011998	0.665235	0.727	1056275	0.207467	0.00951798	244562	GCST90027484	17	959515	0.0170991	2.88e-06	7738	0.00282194	7738	6.4974e-06	244562	TRUE	1.16812e-05	0.00285091	22.1177	42.2042	21.8923
rs2869014	A	G	A	G	-0.120324	0.00669727	0.103713	0.0818	39489659	0.600163	0.012777	244562	GCST90027484	20	38118302	0.0262563	4.59e-06	7738	0.00270735	7738	1.12345e-06	244562	TRUE	9.97264e-06	0.00269163	20.8786	42.2042	21.0009
rs36107535	T	C	T	C	-0.0933045	0.0136703	0.244568	0.2403	144126846	0.130389	0.0090378	244562	GCST90027484	3	143845688	0.0186972	6.03e-07	7738	0.00320878	7738	9.35495e-06	244562	TRUE	3.39409e-06	0.00321685	24.9658	42.2042	24.903
rs409480	G	C	G	C	-0.0795352	-0.00809742	0.715188	0.7239	35786849	0.33529	0.00840406	244562	GCST90027484	21	37159147	0.0177161	7.14e-06	7738	0.00259858	7738	3.79602e-06	244562	TRUE	2.14569e-05	0.00257708	19.9878	42.2042	20.155
rs537576	T	C	T	C	-0.0870158	-0.000650831	0.228849	0.228	5411603	0.939858	0.00862618	244562	GCST90027484	16	5461604	0.0196839	9.84e-06	7738	0.00251978	7738	2.32763e-08	244562	TRUE	1.44412e-05	0.00267248	20.7297	42.2042	19.5422
rs735254	G	A	G	A	-0.0841755	-0.00252766	0.679164	0.6493	13377129	0.751952	0.00799724	244562	GCST90027484	18	13377128	0.0177961	2.25e-06	7738	0.00288371	7738	4.08481e-07	244562	TRUE	4.24442e-06	0.00308787	23.9618	42.2042	22.3729
rs76383640	A	G	A	G	0.159693	-0.0123678	0.0801085	0.1104	50192991	0.287207	0.0116209	244562	GCST90027484	19	50696248	0.0305452	1.71e-07	7738	0.00352077	7738	4.63143e-06	244562	TRUE	7.13643e-07	0.00375852	29.1856	42.2042	27.3329
rs11007911	A	G	A	G	-0.137289	0.0161342	0.0796781	0.09407	18975285	0.318305	0.0161674	244562	GCST90027485	10	19264214	0.0308286	8.46e-06	7738	0.00255703	7738	4.07219e-06	244562	TRUE	2.58084e-05	0.00276427	21.4437	42.2042	19.8319
rs163056	C	T	C	T	0.0715464	-0.00195903	0.518416	0.5266	26934750	0.799455	0.00771112	244562	GCST90027485	18	24514714	0.0159612	7.38e-06	7738	0.00259061	7738	2.63913e-07	244562	TRUE	1.26199e-05	0.00255597	19.8237	42.2042	20.093
rs2704240	G	T	G	T	-0.0726385	-0.00281533	0.503827	0.5368	96606453	0.714361	0.00769204	244562	GCST90027485	8	97618681	0.0161263	6.66e-06	7738	0.00261583	7738	5.47759e-07	244562	TRUE	1.25129e-05	0.00263802	20.4617	42.2042	20.2892
rs28542462	C	T	C	T	0.0982763	-0.00364132	0.301778	0.273	3883491	0.653991	0.00812387	244562	GCST90027485	4	3885218	0.02159	5.32e-06	7738	0.00267125	7738	8.21497e-07	244562	TRUE	1.0783e-05	0.00407013	31.6152	42.2042	20.7201
rs5752622	G	A	G	A	-0.0906364	-0.0304696	0.798232	0.8303	27717115	0.00160033	0.00965497	244562	GCST90027485	22	28113103	0.0201528	6.88e-06	7738	0.00260786	7738	4.0722e-05	244562	TRUE	0.000107418	0.00264616	20.525	42.2042	20.2271
rs9324123	G	A	G	A	0.083808	0.00999896	0.74863	0.7566	24816648	0.282942	0.00931233	244562	GCST90027485	15	25061795	0.0185794	6.46e-06	7738	0.00262331	7738	4.71418e-06	244562	TRUE	2.12933e-05	0.00264351	20.5044	42.2042	20.3473
rs113552917	A	T	A	T	-0.264877	-0.0155156	0.0808556	0.06646	47234411	0.368231	0.0172435	244562	GCST90027486	17	45311777	0.0599029	9.79e-06	7738	0.00252104	7738	3.31053e-06	244562	TRUE	2.74321e-05	0.0104283	81.5233	42.2042	19.5521
rs12056629	C	T	C	T	0.220994	0.0055558	0.162447	0.1738	18003354	0.563938	0.00962873	244562	GCST90027486	8	17860863	0.0437964	4.51e-07	7738	0.0032805	7738	1.36135e-06	244562	TRUE	1.15087e-06	0.0132897	104.194	42.2042	25.4615
rs17153829	T	C	T	C	0.289462	0.0128307	0.0718029	0.091	13738553	0.366154	0.0141979	244562	GCST90027486	10	13780553	0.0620549	3.09e-06	7738	0.00280475	7738	3.33936e-06	244562	TRUE	9.342e-06	0.0111685	87.3755	42.2042	21.7586
rs2206783	G	A	G	A	0.197497	0.0255757	0.80203	0.819	38571679	0.0128487	0.0102799	244562	GCST90027486	20	37200322	0.0409392	1.41e-06	7738	0.00299931	7738	2.53094e-05	244562	TRUE	1.62285e-05	0.0123863	97.022	42.2042	23.2725
rs4924305	A	G	A	G	0.194748	0.023638	0.596831	0.5992	38867148	0.00314949	0.0080054	244562	GCST90027486	15	39159349	0.0438377	8.89e-06	7738	0.00254465	7738	3.56496e-05	244562	TRUE	0.000115874	0.0182522	143.824	42.2042	19.7356
rs68108910	C	T	C	T	-0.265311	-0.0274525	0.0856918	0.07362	3057755	0.0452929	0.0137131	244562	GCST90027486	18	3057753	0.056847	3.05e-06	7738	0.00280775	7738	1.63871e-05	244562	TRUE	2.21509e-05	0.0110299	86.2791	42.2042	21.7819
rs736348	A	G	A	G	-0.186202	-0.00274656	0.187631	0.226	36783468	0.769841	0.00938729	244562	GCST90027486	6	36751245	0.0408798	5.24e-06	7738	0.00267468	7738	3.50036e-07	244562	TRUE	9.3807e-06	0.0105696	82.6395	42.2042	20.7468
rs737805	A	G	A	G	0.157928	-0.00486479	0.415438	0.456	30295318	0.530431	0.00775453	244562	GCST90027486	22	30691307	0.0335607	2.53e-06	7738	0.00285429	7738	1.60928e-06	244562	TRUE	6.16379e-06	0.0121139	94.8625	42.2042	22.144
rs17814434	T	C	T	C	-0.287963	0.0135248	0.0561389	0.03783	70689727	0.607695	0.0263453	244562	GCST90027487	12	71083507	0.06359	5.94e-06	7738	0.00264381	7738	1.07763e-06	244562	TRUE	1.26351e-05	0.0087877	68.5844	42.2042	20.5067
rs2624489	G	A	G	A	-0.240451	-0.000340228	0.0771916	0.09918	117394320	0.983067	0.0160304	244562	GCST90027487	5	116730016	0.0514641	2.98e-06	7738	0.00281387	7738	1.84191e-09	244562	TRUE	4.35132e-06	0.00823692	64.25	42.2042	21.8295
rs28620806	C	T	C	T	0.146268	0.00912002	0.653466	0.6247	9751794	0.254329	0.00800074	244562	GCST90027487	4	9753418	0.0324179	6.42e-06	7738	0.00262465	7738	5.31305e-06	244562	TRUE	2.23098e-05	0.00968941	75.6907	42.2042	20.3577
rs2895499	A	G	A	G	-0.266455	0.0156463	0.0744206	0.07566	4540430	0.21349	0.0125771	244562	GCST90027487	5	4540543	0.0576131	3.75e-06	7738	0.00275734	7738	6.32806e-06	244562	TRUE	1.4693e-05	0.00978103	76.4135	42.2042	21.3897
rs2913384	A	G	A	G	-0.23026	0.0154653	0.922568	0.8834	158643697	0.166903	0.0111887	244562	GCST90027487	5	158070705	0.0508342	5.91e-06	7738	0.0026452	7738	7.8121e-06	244562	TRUE	2.49366e-05	0.00757506	59.0479	42.2042	20.5175
rs4482264	C	T	C	T	0.127232	0.00883834	0.354681	0.3661	100157763	0.280592	0.0081913	244562	GCST90027487	15	100697968	0.028591	8.58e-06	7738	0.00255333	7738	4.76045e-06	244562	TRUE	2.78651e-05	0.00741029	57.754	42.2042	19.8031
rs4842206	G	A	G	A	0.165422	-0.00267848	0.17556	0.2025	135015844	0.769198	0.00912836	244562	GCST90027487	9	137907690	0.0361546	4.75e-06	7738	0.00269879	7738	3.52051e-07	244562	TRUE	8.54613e-06	0.00792139	61.7691	42.2042	20.9343
rs557948	T	C	T	C	0.228551	-0.000849774	0.117478	0.1708	33230473	0.938497	0.0110133	244562	GCST90027487	9	33230471	0.0437442	1.74e-07	7738	0.00351624	7738	2.43438e-08	244562	TRUE	2.9418e-07	0.0108312	84.708	42.2042	27.2977
rs7552841	T	C	T	C	-0.130382	0.00158629	0.36844	0.3671	55053079	0.849795	0.00837623	244562	GCST90027487	1	55518752	0.0277244	2.57e-06	7738	0.00285072	7738	1.4665e-07	244562	TRUE	4.3384e-06	0.00791128	61.6897	42.2042	22.1162
rs118184992	T	C	T	C	-0.164898	-0.0156977	0.0658176	0.03783	114202823	0.378251	0.0178156	244562	GCST90027488	13	114968298	0.0336218	9.37e-07	7738	0.00309973	7738	3.17458e-06	244562	TRUE	2.98809e-06	0.00334376	25.9541	42.2042	24.0541
rs17034687	G	C	G	C	0.142865	-0.00418981	0.095861	0.05419	3638168	0.75918	0.0136673	244562	GCST90027488	3	3679852	0.0279571	3.22e-07	7738	0.00336424	7738	3.84272e-07	244562	TRUE	6.54576e-07	0.00353801	27.4672	42.2042	26.1136
rs4960590	G	A	G	A	0.17205	-0.0161408	0.0570902	0.06237	155258218	0.365337	0.0178304	244562	GCST90027488	7	155049928	0.0358606	1.6e-06	7738	0.00296666	7738	3.35076e-06	244562	TRUE	5.05536e-06	0.00318692	24.7328	42.2042	23.0184
rs55919213	T	C	T	C	0.113638	-0.00668267	0.151809	0.1462	1410032	0.584366	0.0122165	244562	GCST90027488	6	1410267	0.0254525	8.02e-06	7738	0.00257011	7738	1.22354e-06	244562	TRUE	1.72514e-05	0.00332559	25.8126	42.2042	19.9336
rs7147611	A	G	A	G	-0.0814631	0.000928886	0.656995	0.6104	94558594	0.905617	0.00783415	244562	GCST90027488	14	95024931	0.0176494	3.92e-06	7738	0.00274632	7738	5.74851e-08	244562	TRUE	6.14938e-06	0.00299099	23.2077	42.2042	21.304
rs76039193	G	A	G	A	0.0943389	0.00496288	0.205257	0.1953	73699218	0.619889	0.0100057	244562	GCST90027488	8	74611453	0.0211883	8.49e-06	7738	0.002556	7738	1.00598e-06	244562	TRUE	1.74993e-05	0.0029036	22.5276	42.2042	19.8239
rs80205307	T	C	T	C	0.136232	-0.0210491	0.0984987	0.08998	50278912	0.123784	0.0136764	244562	GCST90027488	19	50782169	0.0294225	3.65e-06	7738	0.00276364	7738	9.68578e-06	244562	TRUE	1.81279e-05	0.00329598	25.5821	42.2042	21.4387
rs9982657	A	G	A	G	-0.185895	0.0149873	0.051495	0.03374	25200126	0.511452	0.0228264	244562	GCST90027488	21	26572440	0.0376992	8.18e-07	7738	0.00313323	7738	1.76274e-06	244562	TRUE	2.16893e-06	0.00337575	26.2032	42.2042	24.3148
rs111549352	C	T	C	T	-0.362288	-0.0162525	0.0529533	0.03783	34650453	0.429489	0.0205711	244562	GCST90027489	4	34652075	0.0759395	1.84e-06	7738	0.00293346	7738	2.55235e-06	244562	TRUE	5.21115e-06	0.0131644	103.199	42.2042	22.76
rs56061025	G	A	G	A	0.202777	-0.0150701	0.171142	0.2014	240002082	0.133107	0.0100336	244562	GCST90027489	1	240165382	0.0456109	8.76e-06	7738	0.00254845	7738	9.22419e-06	244562	TRUE	3.92266e-05	0.0116655	91.3096	42.2042	19.7651
rs7193741	G	T	G	T	0.167159	-0.00384275	0.575354	0.591	12758085	0.623316	0.00782389	244562	GCST90027489	16	12851942	0.0374578	8.1e-06	7738	0.00256769	7738	9.86401e-07	244562	TRUE	1.66618e-05	0.0136537	107.087	42.2042	19.9148
rs72727948	A	C	A	C	-0.340848	-0.0405952	0.0622588	0.08896	133951366	0.0262694	0.018268	244562	GCST90027489	8	134963609	0.0732542	3.27e-06	7738	0.00279078	7738	2.01918e-05	244562	TRUE	2.79522e-05	0.0135655	106.386	42.2042	21.6499
rs75084758	T	C	T	C	-0.31214	0.0328989	0.0810094	0.05521	106227332	0.0402087	0.0160357	244562	GCST90027489	10	107987090	0.0701178	8.52e-06	7738	0.00255514	7738	1.72104e-05	244562	TRUE	5.78283e-05	0.0145069	113.878	42.2042	19.8172
rs78219112	C	A	C	A	-0.236375	-0.011735	0.140307	0.136	136063685	0.27075	0.0106552	244562	GCST90027489	4	136984840	0.0521504	5.83e-06	7738	0.00264862	7738	4.95967e-06	244562	TRUE	1.97728e-05	0.0134789	105.698	42.2042	20.5441
rs902061	C	T	C	T	0.147904	0.0118362	0.522882	0.5491	128705011	0.127602	0.00776844	244562	GCST90027489	12	129189556	0.0332725	8.78e-06	7738	0.0025478	7738	9.49221e-06	244562	TRUE	3.9973e-05	0.0109149	85.3694	42.2042	19.7601
rs10918287	A	G	A	G	-0.0781066	-0.000623543	0.633281	0.6585	165814915	0.937235	0.00791845	244562	GCST90027490	1	165784152	0.0173838	7.02e-06	7738	0.00260278	7738	2.53552e-08	244562	TRUE	1.04493e-05	0.00283358	21.9829	42.2042	20.1877
rs11790347	G	C	G	C	0.172086	0.00772395	0.0511725	0.05521	14449079	0.621314	0.0156359	244562	GCST90027490	9	14449077	0.0377768	5.23e-06	7738	0.00267523	7738	9.97812e-07	244562	TRUE	1.10176e-05	0.00287571	22.3106	42.2042	20.7511
rs12677665	G	A	G	A	0.0820111	0.00557682	0.688302	0.6616	29376305	0.494333	0.00816	244562	GCST90027490	8	29233822	0.0177587	3.87e-06	7738	0.00274923	7738	1.90988e-06	244562	TRUE	9.65807e-06	0.00288595	22.3903	42.2042	21.3267
rs1321819	A	G	A	G	-0.0837878	0.00915559	0.282419	0.3241	24402811	0.242772	0.00783811	244562	GCST90027490	6	24403039	0.0180916	3.63e-06	7738	0.00276496	7738	5.57907e-06	244562	TRUE	1.34388e-05	0.00284549	22.0755	42.2042	21.449
rs17118750	C	T	C	T	0.126177	-0.0255927	0.0945335	0.08282	115748986	0.0886258	0.0150307	244562	GCST90027490	11	115619704	0.0282402	7.9e-06	7738	0.00257388	7738	1.18545e-05	244562	TRUE	4.15548e-05	0.00272551	21.1422	42.2042	19.963
rs2096694	T	C	T	C	0.0874062	0.0133961	0.296603	0.3129	33999481	0.11351	0.00846455	244562	GCST90027490	21	35371782	0.0180324	1.25e-06	7738	0.00302792	7738	1.02414e-05	244562	TRUE	7.04039e-06	0.0031878	24.7397	42.2042	23.4951
rs2244670	A	T	A	T	-0.0923156	-0.00674852	0.208219	0.2321	109764678	0.495405	0.009899	244562	GCST90027490	10	111524436	0.0199879	3.86e-06	7738	0.00274982	7738	1.90041e-06	244562	TRUE	9.62311e-06	0.00281	21.7994	42.2042	21.3312
rs62104460	T	C	T	C	0.126388	0.00435901	0.101043	0.1196	2877316	0.696277	0.0111669	244562	GCST90027490	2	2881088	0.0282868	7.89e-06	7738	0.002574	7738	6.23053e-07	244562	TRUE	1.501e-05	0.00290193	22.5147	42.2042	19.9638
rs657516	G	A	G	A	-0.156583	-0.000872093	0.06019	0.06544	101051381	0.953977	0.0151108	244562	GCST90027490	11	100922112	0.0349849	7.62e-06	7738	0.00258279	7738	1.36197e-08	244562	TRUE	1.11132e-05	0.00277385	21.5182	42.2042	20.0322
rs67156511	G	T	G	T	-0.117423	0.0202817	0.12085	0.1442	5305703	0.0978295	0.0122513	244562	GCST90027490	18	5305702	0.0263682	8.46e-06	7738	0.00255692	7738	1.1206e-05	244562	TRUE	4.26951e-05	0.00292985	22.732	42.2042	19.831
rs10213988	C	T	C	T	0.0857065	0.00860696	0.23195	0.2761	72084966	0.309815	0.00847467	244562	GCST90027491	5	71380793	0.019281	8.78e-06	7738	0.00254768	7738	4.21761e-06	244562	TRUE	2.71091e-05	0.00261723	20.3	42.2042	19.7592
rs10756052	C	G	C	G	0.089341	-0.00753672	0.240585	0.271	10515836	0.39716	0.00890124	244562	GCST90027491	9	10515836	0.019147	3.07e-06	7738	0.00280649	7738	2.93141e-06	244562	TRUE	8.8602e-06	0.00291662	22.6289	42.2042	21.7721
rs11058744	T	G	T	G	-0.155967	0.00775587	0.0707436	0.09305	126607334	0.667758	0.0180694	244562	GCST90027491	12	127091880	0.0319398	1.04e-06	7738	0.0030729	7738	7.53335e-07	244562	TRUE	2.24759e-06	0.00319829	24.8214	42.2042	23.8452
rs11070764	C	T	C	T	-0.077654	0.0200233	0.553392	0.5215	31048609	0.00908197	0.00767484	244562	GCST90027491	15	31340812	0.0164151	2.24e-06	7738	0.00288449	7738	2.78314e-05	244562	TRUE	2.6904e-05	0.00298069	23.1276	42.2042	22.379
rs11139000	C	T	C	T	-0.0818744	0.00478693	0.282074	0.3067	81061437	0.554284	0.00809488	244562	GCST90027491	9	83676352	0.018107	6.13e-06	7738	0.00263597	7738	1.42991e-06	244562	TRUE	1.38608e-05	0.00271499	21.0604	42.2042	20.4458
rs1428949	T	C	T	C	-0.0743313	-0.00809967	0.433176	0.4724	9947500	0.293243	0.00770638	244562	GCST90027491	5	9947612	0.0165197	6.81e-06	7738	0.00261028	7738	4.51696e-06	244562	TRUE	2.19771e-05	0.00271323	21.0466	42.2042	20.246
rs7108080	A	G	A	G	-0.0891578	0.00280906	0.508635	0.4305	59959292	0.727659	0.00806642	244562	GCST90027491	11	59726765	0.0167524	1.03e-07	7738	0.00364805	7738	4.95878e-07	244562	TRUE	2.27465e-07	0.00397337	30.8606	42.2042	28.3247
rs741054	A	T	A	T	0.0874913	-0.00937398	0.243661	0.2444	31042365	0.32853	0.00959388	244562	GCST90027491	7	31081980	0.0188945	3.65e-06	7738	0.00276402	7738	3.90366e-06	244562	TRUE	1.15719e-05	0.00282138	21.888	42.2042	21.4417
rs76346802	G	A	G	A	-0.127657	0.0140506	0.0931431	0.09611	90990521	0.269222	0.0127171	244562	GCST90027491	11	90723689	0.0279162	4.81e-06	7738	0.0026958	7738	4.99142e-06	244562	TRUE	1.65897e-05	0.00275302	21.3561	42.2042	20.9111
rs79747739	C	A	C	A	0.162288	0.00325173	0.0806663	0.08896	28963859	0.834619	0.0155748	244562	GCST90027491	14	29433065	0.03077	1.33e-07	7738	0.00358296	7738	1.78237e-07	244562	TRUE	2.56695e-07	0.00390632	30.3378	42.2042	27.8175
rs11107787	T	C	T	C	0.110006	-0.0160317	0.148261	0.1779	94917893	0.190845	0.0122559	244562	GCST90027492	12	95311669	0.0226014	1.13e-06	7738	0.00305294	7738	6.99653e-06	244562	TRUE	5.1096e-06	0.0030563	23.716	42.2042	23.6898
rs12735521	T	C	T	C	0.0769256	-0.00121956	0.32237	0.3057	18123827	0.878559	0.00798161	244562	GCST90027492	1	18450321	0.0170061	6.08e-06	7738	0.00263796	7738	9.5464e-08	244562	TRUE	9.6653e-06	0.00258535	20.0521	42.2042	20.4613
rs2306372	G	A	G	A	0.111617	-0.000485692	0.186595	0.2914	149978571	0.9555	0.00870393	244562	GCST90027492	3	149696358	0.0235532	2.15e-06	7738	0.00289458	7738	1.27323e-08	244562	TRUE	3.26514e-06	0.00378179	29.367	42.2042	22.4575
rs55804433	T	C	T	C	-0.0850326	-0.00400026	0.277617	0.2669	175048382	0.658137	0.00904041	244562	GCST90027492	3	174766172	0.0185278	4.44e-06	7738	0.00271535	7738	8.00599e-07	244562	TRUE	9.04864e-06	0.00290011	22.5005	42.2042	21.0631
rs9461124	T	C	T	C	-0.0970976	-0.00743003	0.17584	0.2045	25235075	0.504731	0.0111384	244562	GCST90027492	6	25235303	0.0211387	4.36e-06	7738	0.00271995	7738	1.81949e-06	244562	TRUE	1.06641e-05	0.0027326	21.1973	42.2042	21.0989
rs10856807	C	T	C	T	-0.20668	-0.0101033	0.354718	0.3599	34519547	0.19891	0.00786455	244562	GCST90027493	4	34521169	0.0462699	7.94e-06	7738	0.00257255	7738	6.74823e-06	244562	TRUE	3.03643e-05	0.0195551	154.295	42.2042	19.9526
rs111457769	C	T	C	T	0.337718	0.0165141	0.112527	0.1002	75066981	0.162664	0.0118282	244562	GCST90027493	7	74482794	0.0722672	2.97e-06	7738	0.00281504	7738	7.97051e-06	244562	TRUE	1.33634e-05	0.0227798	180.333	42.2042	21.8387
rs12041866	T	C	T	C	-0.376771	0.0136646	0.0747288	0.08384	60018859	0.315045	0.0136008	244562	GCST90027493	1	60484531	0.0807643	3.09e-06	7738	0.0028053	7738	4.12742e-06	244562	TRUE	1.01181e-05	0.019631	154.906	42.2042	21.7629
rs12522600	A	T	A	T	-0.225331	0.0180889	0.249899	0.2495	79560510	0.0336736	0.0085166	244562	GCST90027493	5	78856333	0.049199	4.65e-06	7738	0.00270419	7738	1.84459e-05	244562	TRUE	3.54932e-05	0.0190351	150.113	42.2042	20.9763
rs2010151	C	A	C	A	-0.197206	0.00129759	0.418744	0.4305	31806327	0.866076	0.00769422	244562	GCST90027493	5	31806434	0.0441133	7.81e-06	7738	0.0025767	7738	1.16295e-07	244562	TRUE	1.24432e-05	0.0189316	149.281	42.2042	19.9849
rs6124449	C	A	C	A	-0.379049	-0.0144472	0.092716	0.1135	42369604	0.21834	0.0117366	244562	GCST90027493	20	40998244	0.0778587	1.12e-06	7738	0.00305444	7738	6.19578e-06	244562	TRUE	4.76396e-06	0.0241723	191.629	42.2042	23.7015
rs6868622	T	C	T	C	-0.237472	-0.016887	0.28369	0.2924	95134024	0.0445102	0.00840461	244562	GCST90027493	5	94469728	0.0495125	1.62e-06	7738	0.00296476	7738	1.65073e-05	244562	TRUE	1.25588e-05	0.0229192	181.462	42.2042	23.0036
rs10223540	T	C	T	C	-0.185493	0.0134728	0.1009	0.08384	21206088	0.378043	0.0152838	244562	GCST90027494	6	21206319	0.0418583	9.36e-06	7738	0.00253206	7738	3.17735e-06	244562	TRUE	2.59337e-05	0.00624287	48.5982	42.2042	19.6378
rs11582075	T	C	T	C	-0.137144	0.00496522	0.219197	0.184	83210052	0.629061	0.0102789	244562	GCST90027494	1	83675735	0.0302967	5.99e-06	7738	0.00264179	7738	9.54106e-07	244562	TRUE	1.24285e-05	0.00643813	50.1281	42.2042	20.491
rs12034038	C	G	C	G	0.145688	-0.0137767	0.174619	0.1585	83575927	0.272367	0.0125513	244562	GCST90027494	1	84041610	0.0328667	9.31e-06	7738	0.00253348	7738	4.92632e-06	244562	TRUE	3.04738e-05	0.0061182	47.6217	42.2042	19.6488
rs27099	T	A	T	A	-0.137509	0.0263474	0.208739	0.2239	14463530	0.0123166	0.0105266	244562	GCST90027494	5	14463639	0.0310886	9.73e-06	7738	0.00252259	7738	2.56156e-05	244562	TRUE	9.06167e-05	0.0062462	48.6243	42.2042	19.5641
rs36182340	T	G	T	G	0.235877	0.00524829	0.903211	0.8855	155326760	0.665059	0.0121225	244562	GCST90027494	7	155118470	0.0420321	2e-08	7738	0.00405441	7738	7.66422e-07	244562	TRUE	5.17385e-08	0.00972784	75.9938	42.2042	31.4926
rs6562993	G	A	G	A	-0.133596	0.00441555	0.236848	0.2628	77340453	0.602854	0.00848653	244562	GCST90027494	13	77914588	0.0296076	6.42e-06	7738	0.00262496	7738	1.10694e-06	244562	TRUE	1.3665e-05	0.00645205	50.2372	42.2042	20.3601
rs72814612	C	A	C	A	0.200658	-0.0122375	0.107888	0.08998	94181702	0.286168	0.0114737	244562	GCST90027494	10	95941459	0.0429821	3.04e-06	7738	0.00280931	7738	4.65144e-06	244562	TRUE	1.04771e-05	0.0077506	60.427	42.2042	21.794
rs857120	C	T	C	T	0.208416	-0.0200095	0.0883455	0.091	56745726	0.130111	0.0132192	244562	GCST90027494	1	57211399	0.0458464	5.47e-06	7738	0.00266426	7738	9.36849e-06	244562	TRUE	2.57165e-05	0.00699692	54.5096	42.2042	20.6658
rs10490196	A	G	A	G	0.0988657	0.0177829	0.197408	0.1656	66843201	0.066673	0.00969692	244562	GCST90027495	2	67070333	0.0219208	6.48e-06	7738	0.00262254	7738	1.37514e-05	244562	TRUE	3.83631e-05	0.00309728	24.035	42.2042	20.3413
rs10951264	A	G	A	G	0.0833274	0.025872	0.637001	0.6022	3623138	0.000987575	0.00785418	244562	GCST90027495	7	3662770	0.0181076	4.19e-06	7738	0.00272992	7738	4.43664e-05	244562	TRUE	7.76389e-05	0.00321108	24.9209	42.2042	21.1765
rs12514068	T	C	T	C	-0.07789	-0.0089316	0.389548	0.3773	8263950	0.274075	0.00816621	244562	GCST90027495	5	8264063	0.017578	9.37e-06	7738	0.00253167	7738	4.89136e-06	244562	TRUE	3.05912e-05	0.0028854	22.386	42.2042	19.6347
rs200243	A	G	A	G	0.142409	-0.0139038	0.0873623	0.1074	50467076	0.309081	0.0136693	244562	GCST90027495	6	50434789	0.0316777	6.94e-06	7738	0.00260566	7738	4.23043e-06	244562	TRUE	2.17815e-05	0.00323391	25.0987	42.2042	20.2101
rs2586438	T	C	T	C	-0.0826985	-0.0217463	0.57861	0.5583	50368338	0.00537131	0.00781151	244562	GCST90027495	17	48445699	0.0185658	8.41e-06	7738	0.00255823	7738	3.16885e-05	244562	TRUE	9.78212e-05	0.003335	25.8859	42.2042	19.8412
rs2645383	C	T	C	T	0.0871736	0.00336786	0.334436	0.3466	100972224	0.686999	0.0083584	244562	GCST90027495	4	101893381	0.0188008	3.54e-06	7738	0.00277138	7738	6.63859e-07	244562	TRUE	7.05219e-06	0.00338301	26.2598	42.2042	21.499
rs3799603	C	T	C	T	-0.0952307	-0.00789345	0.360162	0.3016	166587798	0.348215	0.00841468	244562	GCST90027495	6	167001286	0.0182225	1.73e-07	7738	0.00351796	7738	3.59809e-06	244562	TRUE	6.4359e-07	0.00417977	32.4704	42.2042	27.311
rs62381166	C	T	C	T	-0.151374	-0.00320946	0.0770703	0.0593	157063820	0.799162	0.0126142	244562	GCST90027495	5	156490831	0.0327471	3.79e-06	7738	0.0027545	7738	2.64702e-07	244562	TRUE	6.66335e-06	0.00325978	25.3001	42.2042	21.3677
rs66470361	T	C	T	C	0.0825122	-0.00477024	0.402943	0.4325	50298241	0.555996	0.00810164	244562	GCST90027495	16	50332152	0.0178171	3.64e-06	7738	0.00276467	7738	1.41758e-06	244562	TRUE	8.42737e-06	0.00327586	25.4254	42.2042	21.4468
rs6672992	C	A	C	A	-0.104073	-0.010798	0.189469	0.1881	65382351	0.284256	0.010084	244562	GCST90027495	1	65848034	0.0222859	3.01e-06	7738	0.0028111	7738	4.68852e-06	244562	TRUE	1.0442e-05	0.0033267	25.8213	42.2042	21.808
rs74768264	G	A	G	A	0.128453	-0.0188267	0.13271	0.1391	69086910	0.217193	0.0152563	244562	GCST90027495	3	69136061	0.0260338	8.05e-07	7738	0.00313713	7738	6.22674e-06	244562	TRUE	3.50218e-06	0.00379828	29.4955	42.2042	24.3452
rs7690663	C	G	C	G	0.0977238	-0.00456488	0.200105	0.2137	22012710	0.648288	0.0100076	244562	GCST90027495	4	22014333	0.0219458	8.47e-06	7738	0.00255664	7738	8.50774e-07	244562	TRUE	1.69151e-05	0.00305718	23.7229	42.2042	19.8289
rs953621	A	C	A	C	0.106359	-0.00468451	0.198582	0.229	58789768	0.597894	0.00888174	244562	GCST90027495	5	58085595	0.021616	8.64e-07	7738	0.00311978	7738	1.13749e-06	244562	TRUE	2.04241e-06	0.00360062	27.9551	42.2042	24.2102
rs10478090	A	G	A	G	0.241206	0.0150371	0.916364	0.92536	112506202	0.215132	0.0121308	244562	GCST90027496	5	111841899	0.0530633	5.48e-06	7738	0.00266387	7738	6.28288e-06	244562	TRUE	2.08042e-05	0.008918	69.6104	42.2042	20.6627
rs113865897	A	G	A	G	0.292743	-0.0220436	0.0616905	0.07873	39545550	0.10601	0.0136376	244562	GCST90027496	4	39547170	0.0647025	6.06e-06	7738	0.00263917	7738	1.06832e-05	244562	TRUE	3.05567e-05	0.00992127	77.5201	42.2042	20.4706
rs1963381	A	G	A	G	0.167074	0.00512613	0.761011	0.7618	38546022	0.574761	0.00913661	244562	GCST90027496	18	36125986	0.0341354	9.86e-07	7738	0.00308708	7738	1.28713e-06	244562	TRUE	2.38404e-06	0.0101535	79.3533	42.2042	23.9556
rs36039198	A	G	A	G	-0.28699	0.0121008	0.0993116	0.1268	12086244	0.286656	0.0113571	244562	GCST90027496	17	11989561	0.0551751	1.98e-07	7738	0.00348509	7738	4.64203e-06	244562	TRUE	8.1721e-07	0.0147346	115.691	42.2042	27.055
rs72956918	A	G	A	G	0.325538	-0.0184471	0.0703907	0.04908	87922846	0.309134	0.018138	244562	GCST90027496	11	87633738	0.0653775	6.38e-07	7738	0.00319478	7738	4.2295e-06	244562	TRUE	2.34201e-06	0.0138691	108.801	42.2042	24.794
rs10917476	G	C	G	C	0.0828812	0.0151831	0.313636	0.3333	19534346	0.053031	0.00784791	244562	GCST90027497	1	19860840	0.0174684	2.09e-06	7738	0.00290153	7738	1.53046e-05	244562	TRUE	1.49095e-05	0.00295748	22.947	42.2042	22.5116
rs12700304	T	G	T	G	0.0843908	0.0134054	0.249884	0.2076	21800878	0.169713	0.00976268	244562	GCST90027497	7	21840496	0.0187182	6.53e-06	7738	0.00262063	7738	7.70961e-06	244562	TRUE	2.71452e-05	0.00266985	20.7093	42.2042	20.3265
rs17639960	C	T	C	T	-0.107741	-0.000231621	0.156574	0.138	192582486	0.981524	0.0100016	244562	GCST90027497	2	193447212	0.0230856	3.06e-06	7738	0.00280764	7738	2.19295e-09	244562	TRUE	4.46619e-06	0.0030659	23.7908	42.2042	21.7811
rs181541	G	A	G	A	0.0785302	-0.000301907	0.620551	0.6636	8915972	0.970976	0.00829775	244562	GCST90027497	17	8819289	0.0172148	5.07e-06	7738	0.00268279	7738	5.41303e-09	244562	TRUE	7.37258e-06	0.00290425	22.5327	42.2042	20.8099
rs7096251	T	C	T	C	-0.0846704	-0.00626258	0.60112	0.681	122562374	0.471887	0.00870513	244562	GCST90027497	10	124321890	0.0178762	2.17e-06	7738	0.0028916	7738	2.11626e-06	244562	TRUE	5.76589e-06	0.00343793	26.6876	42.2042	22.4343
rs10933259	G	A	G	A	0.0850658	0.0131961	0.287238	0.3016	228489133	0.105255	0.00814627	244562	GCST90027498	2	229353849	0.0180993	2.6e-06	7738	0.00284729	7738	1.07296e-05	244562	TRUE	1.41702e-05	0.00296296	22.9896	42.2042	22.0895
rs1690328	C	T	C	T	-0.0832316	-0.00281354	0.733708	0.7362	57591983	0.729562	0.00813848	244562	GCST90027498	15	57884181	0.0185034	6.85e-06	7738	0.00260869	7738	4.8869e-07	244562	TRUE	1.26576e-05	0.002707	20.9982	42.2042	20.2336
rs2282015	G	T	G	T	-0.0755993	0.0140827	0.379771	0.4274	123462521	0.0768706	0.0079602	244562	GCST90027498	10	125222037	0.0169527	8.22e-06	7738	0.00256405	7738	1.27977e-05	244562	TRUE	4.53073e-05	0.0026924	20.8846	42.2042	19.8865
rs288625	A	G	A	G	0.123882	0.0173689	0.884763	0.8742	62646494	0.147014	0.0119772	244562	GCST90027498	16	62680398	0.0258491	1.65e-06	7738	0.0029602	7738	8.59889e-06	244562	TRUE	8.123e-06	0.00312943	24.2853	42.2042	22.9681
rs3908395	G	A	G	A	0.0841692	-0.0119693	0.674308	0.683	33361793	0.148813	0.0082905	244562	GCST90027498	11	33383339	0.0180774	3.22e-06	7738	0.00279449	7738	8.52289e-06	244562	TRUE	1.49863e-05	0.00311173	24.1475	42.2042	21.6788
rs4451355	T	A	T	A	0.0754375	-0.019046	0.637633	0.593	9471965	0.0164354	0.00793881	244562	GCST90027498	9	9471965	0.0170426	9.58e-06	7738	0.00252632	7738	2.35343e-05	244562	TRUE	8.29076e-05	0.00262981	20.3978	42.2042	19.5931
rs6072106	C	T	C	T	0.11865	0.00145763	0.12294	0.1125	40697160	0.884284	0.0100153	244562	GCST90027498	20	39325800	0.0265865	8.09e-06	7738	0.00256791	7738	8.66131e-08	244562	TRUE	1.26429e-05	0.0030359	23.5573	42.2042	19.9165
rs7043302	T	G	T	G	0.174085	-0.0112471	0.0507327	0.05419	9139951	0.392139	0.0131431	244562	GCST90027498	9	9139951	0.0391769	8.85e-06	7738	0.00254589	7738	2.99434e-06	244562	TRUE	2.4114e-05	0.00291897	22.6472	42.2042	19.7452
rs77890687	G	A	G	A	0.116686	-0.0162425	0.131645	0.1186	78315912	0.128213	0.0106775	244562	GCST90027498	16	78349809	0.0243562	1.66e-06	7738	0.00295812	7738	9.46184e-06	244562	TRUE	8.67485e-06	0.00311293	24.1568	42.2042	22.9519
rs79195604	A	G	A	G	0.151377	0.00710967	0.0663535	0.08896	32790530	0.492966	0.01037	244562	GCST90027498	15	33082731	0.0334773	6.13e-06	7738	0.00263607	7738	1.922e-06	244562	TRUE	1.49358e-05	0.0028392	22.0266	42.2042	20.4465
rs9570722	G	A	G	A	-0.078216	-0.0135971	0.393238	0.4458	62756845	0.0775943	0.00770453	244562	GCST90027498	13	63330978	0.0169931	4.17e-06	7738	0.00273113	7738	1.27353e-05	244562	TRUE	2.43943e-05	0.00291941	22.6507	42.2042	21.1859
rs11703988	A	G	A	G	-0.232078	0.0298695	0.0615119	0.07157	33453139	0.261757	0.0266158	244562	GCST90027499	22	33849125	0.0507121	4.73e-06	7738	0.00269994	7738	5.1498e-06	244562	TRUE	1.65587e-05	0.0062185	48.4074	42.2042	20.9433
rs117143105	C	A	C	A	0.161561	0.0037858	0.158405	0.1769	19023733	0.774494	0.0132139	244562	GCST90027499	19	19134542	0.0362862	8.49e-06	7738	0.00255601	7738	3.35636e-07	244562	TRUE	1.48227e-05	0.00695945	54.2156	42.2042	19.8239
rs12983272	T	C	T	C	-0.116097	-0.0005702	0.334327	0.3139	7076894	0.945043	0.00827181	244562	GCST90027499	19	7076905	0.025941	7.63e-06	7738	0.00258243	7738	1.94298e-08	244562	TRUE	1.12296e-05	0.00599935	46.6911	42.2042	20.0294
rs188448548	T	C	T	C	0.195637	-0.0124497	0.086182	0.06339	60073037	0.337131	0.0129705	244562	GCST90027499	11	59840510	0.0435048	6.9e-06	7738	0.00260722	7738	3.7672e-06	244562	TRUE	2.07043e-05	0.00602849	46.9192	42.2042	20.2222
rs3886187	C	T	C	T	0.145717	-0.00172034	0.175975	0.1984	73791033	0.842971	0.00868443	244562	GCST90027499	7	73205363	0.0324572	7.14e-06	7738	0.00259867	7738	1.60458e-07	244562	TRUE	1.16913e-05	0.00615803	47.9337	42.2042	20.1557
rs56260931	C	T	C	T	0.109628	-0.00797194	0.414068	0.4151	30047657	0.308377	0.00782611	244562	GCST90027499	1	30520504	0.0247602	9.53e-06	7738	0.00252766	7738	4.24276e-06	244562	TRUE	2.93167e-05	0.00583166	45.3783	42.2042	19.6035
rs640081	A	G	A	G	-0.129658	-0.00572203	0.708977	0.6973	49896771	0.484048	0.00817659	244562	GCST90027499	12	50290554	0.0291956	8.95e-06	7738	0.00254297	7738	2.00249e-06	244562	TRUE	2.15945e-05	0.00693726	54.0416	42.2042	19.7226
rs72748182	T	G	T	G	-0.181529	0.0226063	0.122365	0.091	44001026	0.0600206	0.0120205	244562	GCST90027499	5	44001128	0.0380795	1.87e-06	7738	0.002929	7738	1.44617e-05	244562	TRUE	1.29132e-05	0.00707772	55.1435	42.2042	22.7253
rs72830334	A	G	A	G	0.193721	0.0147715	0.0941639	0.1074	6545609	0.212349	0.0118444	244562	GCST90027499	17	6448929	0.0414481	2.96e-06	7738	0.00281581	7738	6.3597e-06	244562	TRUE	1.1825e-05	0.00640203	49.8452	42.2042	21.8446
rs73967534	C	A	C	A	-0.163089	-0.00976794	0.137219	0.1595	68488177	0.389011	0.0113394	244562	GCST90027499	18	66155414	0.0344023	2.13e-06	7738	0.00289666	7738	3.03414e-06	244562	TRUE	6.36109e-06	0.00629788	49.0292	42.2042	22.4737
rs9736306	G	A	G	A	-0.199598	-0.017299	0.916673	0.91922	69759838	0.410204	0.0210058	244562	GCST90027499	11	69574606	0.0435973	4.69e-06	7738	0.0027021	7738	2.77317e-06	244562	TRUE	1.29487e-05	0.00608615	47.3708	42.2042	20.9601
rs10894665	T	C	T	C	-0.202854	0.00424876	0.196907	0.1881	100254079	0.658787	0.00962154	244562	GCST90027500	11	100124811	0.0449476	6.39e-06	7738	0.00262601	7738	7.97351e-07	244562	TRUE	1.27796e-05	0.0130144	102.007	42.2042	20.3683
rs1153514	A	G	A	G	0.296834	0.0129916	0.0742352	0.07464	2244376	0.329313	0.0133179	244562	GCST90027500	3	2286060	0.0670059	9.42e-06	7738	0.00253037	7738	3.89104e-06	244562	TRUE	2.80679e-05	0.0121107	94.8366	42.2042	19.6246
rs34718894	A	G	A	G	0.22699	0.0163428	0.156658	0.1943	40322187	0.0630899	0.00879327	244562	GCST90027500	2	40549327	0.0488048	3.3e-06	7738	0.00278843	7738	1.41241e-05	244562	TRUE	2.12558e-05	0.0136144	106.775	42.2042	21.6316
rs34942635	C	T	C	T	0.244274	-0.00280759	0.117045	0.08998	28408237	0.848689	0.0147155	244562	GCST90027500	10	28697166	0.0552774	9.91e-06	7738	0.00251795	7738	1.48844e-07	244562	TRUE	1.59406e-05	0.0123332	96.6011	42.2042	19.5281
rs3858055	A	C	A	C	0.182849	0.00850564	0.48166	0.4519	8261021	0.270985	0.0077268	244562	GCST90027500	9	8261021	0.0403583	5.88e-06	7738	0.00264638	7738	4.95481e-06	244562	TRUE	1.99325e-05	0.0166944	131.34	42.2042	20.5267
rs57006859	T	C	T	C	0.236063	0.00196861	0.15939	0.1616	114461499	0.846435	0.0101648	244562	GCST90027500	2	115219076	0.0495701	1.91e-06	7738	0.002923	7738	1.53368e-07	244562	TRUE	3.28517e-06	0.0149328	117.271	42.2042	22.6786
rs74338794	T	C	T	C	0.231905	0.00639728	0.190267	0.1738	42135332	0.542223	0.0104967	244562	GCST90027500	21	43555442	0.0474995	1.05e-06	7738	0.00307178	7738	1.51879e-06	244562	TRUE	2.6356e-06	0.0165713	130.355	42.2042	23.8365
rs9382699	C	T	C	T	0.192184	0.00245009	0.257064	0.2515	57304917	0.796291	0.00949095	244562	GCST90027500	6	57169715	0.0401386	1.68e-06	7738	0.00295467	7738	2.72496e-07	244562	TRUE	3.06806e-06	0.0141077	110.699	42.2042	22.925
rs9613514	T	G	T	G	0.163306	-0.0101862	0.375811	0.4018	27697394	0.202285	0.00798875	244562	GCST90027500	22	28093392	0.0365877	8.07e-06	7738	0.00256862	7738	6.64781e-06	244562	TRUE	3.05896e-05	0.0125118	98.0177	42.2042	19.9221
rs9954617	T	C	T	C	0.191837	-0.00862091	0.262774	0.1963	59538957	0.385281	0.00992955	244562	GCST90027500	18	57206189	0.0402905	1.92e-06	7738	0.00292195	7738	3.08219e-06	244562	TRUE	5.81021e-06	0.0142586	111.9	42.2042	22.6704
rs10810562	C	T	C	T	-0.103458	0.00920173	0.857281	0.8804	16397157	0.432371	0.0117198	244562	GCST90027501	9	16397155	0.0229546	6.57e-06	7738	0.00261899	7738	2.52063e-06	244562	TRUE	1.72548e-05	0.00261917	20.3151	42.2042	20.3137
rs11148356	T	C	T	C	-0.14327	0.00374836	0.0777056	0.1595	55864215	0.696407	0.00960686	244562	GCST90027501	13	56438349	0.0301886	2.08e-06	7738	0.00290299	7738	6.22492e-07	244562	TRUE	4.19197e-06	0.00294213	22.8275	42.2042	22.5229
rs111926862	G	C	G	C	0.152922	0.0238005	0.0636667	0.06646	50293530	0.340816	0.024986	244562	GCST90027501	8	51206090	0.0337372	5.82e-06	7738	0.00264883	7738	3.71016e-06	244562	TRUE	1.75746e-05	0.00278813	21.6293	42.2042	20.5457
rs116605191	A	G	A	G	0.146581	-0.0010532	0.0661051	0.09407	232331444	0.956476	0.0192977	244562	GCST90027501	2	233196154	0.0327952	7.84e-06	7738	0.00257572	7738	1.21793e-08	244562	TRUE	1.13975e-05	0.00265288	20.5773	42.2042	19.9772
rs12652368	C	T	C	T	-0.0765527	-0.00441359	0.435051	0.455	143779419	0.566755	0.00770479	244562	GCST90027501	5	143158984	0.0164418	3.22e-06	7738	0.00279441	7738	1.34176e-06	244562	TRUE	7.41842e-06	0.00288072	22.3496	42.2042	21.6782
rs1364745	T	C	T	C	0.100517	-0.00282235	0.160109	0.182	136595245	0.796049	0.0109197	244562	GCST90027501	7	136279993	0.0221912	5.91e-06	7738	0.00264515	7738	2.73158e-07	244562	TRUE	1.02373e-05	0.00271736	21.0788	42.2042	20.5172
rs1371744	A	G	A	G	-0.0858229	0.0150332	0.248703	0.227	61414300	0.105276	0.00928092	244562	GCST90027501	8	62326859	0.0191103	7.09e-06	7738	0.0026003	7738	1.07283e-05	244562	TRUE	3.53842e-05	0.00275251	21.3522	42.2042	20.1684
rs55721043	G	A	G	A	0.0872412	0.0188883	0.237246	0.2566	31193531	0.0243192	0.00838716	244562	GCST90027501	13	31767668	0.0191388	5.16e-06	7738	0.00267875	7738	2.07377e-05	244562	TRUE	4.28957e-05	0.00275459	21.3684	42.2042	20.7785
rs664864	T	C	T	C	-0.0806164	0.00387072	0.63338	0.6656	74255976	0.627014	0.00796553	244562	GCST90027501	3	74305127	0.0169168	1.88e-06	7738	0.00292699	7738	9.65536e-07	244562	TRUE	4.14128e-06	0.00301826	23.42	42.2042	22.7096
rs66662729	T	C	T	C	0.107394	0.00626551	0.148528	0.1534	70677805	0.543502	0.0103132	244562	GCST90027501	7	70142791	0.0234694	4.74e-06	7738	0.00269939	7738	1.50919e-06	244562	TRUE	1.09996e-05	0.00291722	22.6336	42.2042	20.939
rs7160842	G	A	G	A	0.0752614	-0.0122239	0.490014	0.4622	68488984	0.111979	0.00769108	244562	GCST90027501	14	68955701	0.0160597	2.78e-06	7738	0.00283088	7738	1.03289e-05	244562	TRUE	1.46967e-05	0.00283101	21.9629	42.2042	21.9619
rs7177833	G	A	G	A	0.0988101	0.00835713	0.160088	0.1299	48885848	0.343103	0.00881506	244562	GCST90027501	15	49178045	0.0220265	7.26e-06	7738	0.00259458	7738	3.67517e-06	244562	TRUE	2.15241e-05	0.00262558	20.365	42.2042	20.1239
rs73216471	C	G	C	G	-0.10774	-0.0169616	0.168911	0.1892	8060499	0.147725	0.0117169	244562	GCST90027501	4	8062226	0.0215077	5.46e-07	7738	0.00323328	7738	8.56873e-06	244562	TRUE	2.93197e-06	0.00325904	25.2944	42.2042	25.0938
rs7622789	T	C	T	C	-0.0914599	0.0163706	0.194319	0.2076	127990226	0.0918481	0.00971129	244562	GCST90027501	3	127709069	0.0202225	6.11e-06	7738	0.00263711	7738	1.16194e-05	244562	TRUE	3.24719e-05	0.00261921	20.3154	42.2042	20.4546
rs10520129	G	A	G	A	-0.0785513	0.00285044	0.420966	0.4029	39349684	0.712612	0.00773839	244562	GCST90027502	15	39641885	0.0166586	2.41e-06	7738	0.00286594	7738	5.548e-07	244562	TRUE	4.75092e-06	0.00300807	23.3406	42.2042	22.2346
rs10962279	C	T	C	T	-0.0966023	0.0094137	0.210045	0.1912	16103032	0.299338	0.00907035	244562	GCST90027502	9	16103030	0.0204411	2.29e-06	7738	0.00287871	7738	4.40439e-06	244562	TRUE	7.87271e-06	0.00309685	24.0316	42.2042	22.334
rs11661548	G	A	G	A	-0.147553	-0.0163783	0.0686943	0.07464	2831415	0.322935	0.0165698	244562	GCST90027502	18	2831413	0.0323794	5.19e-06	7738	0.00267718	7738	3.99501e-06	244562	TRUE	1.62345e-05	0.00278573	21.6106	42.2042	20.7663
rs17075041	T	A	T	A	0.192704	0.0034742	0.0542748	0.04601	50977687	0.886659	0.0243747	244562	GCST90027502	13	51551823	0.0386401	6.13e-07	7738	0.00320475	7738	8.30702e-08	244562	TRUE	1.04906e-06	0.00381219	29.604	42.2042	24.8717
rs28712495	A	G	A	G	0.104282	-0.00255493	0.144073	0.1544	77566138	0.817601	0.011078	244562	GCST90027502	7	77195455	0.0233612	8.05e-06	7738	0.00256918	7738	2.17496e-07	244562	TRUE	1.34665e-05	0.00268206	20.8042	42.2042	19.9264
rs6665381	A	G	A	G	-0.134675	0.030253	0.0815995	0.1094	64611899	0.0511152	0.0155103	244562	GCST90027502	1	65077582	0.0301918	8.17e-06	7738	0.00256545	7738	1.55562e-05	244562	TRUE	5.16467e-05	0.00271846	21.0874	42.2042	19.8974
rs6930880	T	C	T	C	0.0843052	0.00179359	0.648879	0.5971	162325327	0.815309	0.00767861	244562	GCST90027502	6	162746359	0.016916	6.24e-07	7738	0.0032004	7738	2.23098e-07	244562	TRUE	1.15664e-06	0.00323861	25.1353	42.2042	24.8378
rs73217710	A	G	A	G	0.146879	-0.00406979	0.0762051	0.08998	26340717	0.840817	0.020263	244562	GCST90027502	8	26198233	0.0308675	1.95e-06	7738	0.00291831	7738	1.6495e-07	244562	TRUE	3.36622e-06	0.00303745	23.5693	42.2042	22.6421
rs78776904	A	T	A	T	0.215774	-0.0403423	0.0585796	0.05521	50994392	0.0531288	0.0208609	244562	GCST90027502	20	49610929	0.0449735	1.6e-06	7738	0.00296673	7738	1.5292e-05	244562	TRUE	1.17365e-05	0.00513521	39.931	42.2042	23.0189
rs9368736	C	T	C	T	-0.182013	0.00976376	0.0542344	0.07055	11484242	0.474119	0.0136405	244562	GCST90027502	6	11484475	0.0381171	1.8e-06	7738	0.0029388	7738	2.09502e-06	244562	TRUE	4.79897e-06	0.00339855	26.3808	42.2042	22.8016
rs9416289	T	C	T	C	0.0760858	-0.00237991	0.618193	0.6462	53638316	0.763889	0.00792306	244562	GCST90027502	10	55398076	0.0168453	6.28e-06	7738	0.0026302	7738	3.68935e-07	244562	TRUE	1.12248e-05	0.00273278	21.1987	42.2042	20.4009
rs11023076	C	T	C	T	0.0921683	-0.00576902	0.261425	0.2209	14076213	0.490421	0.00836527	244562	GCST90027503	11	14097760	0.0188391	9.96e-07	7738	0.0030845	7738	1.94472e-06	244562	TRUE	2.68874e-06	0.00328046	25.4612	42.2042	23.9355
rs11630596	T	C	T	C	-0.115151	-0.00531202	0.488776	0.4397	28798340	0.494914	0.00778302	244562	GCST90027503	15	29043486	0.0253519	5.57e-06	7738	0.00265975	7738	1.90475e-06	244562	TRUE	1.36041e-05	0.00662654	51.6048	42.2042	20.6307
rs2035940	C	T	C	T	-0.0785142	0.00199787	0.483609	0.4867	130536146	0.7948	0.00768167	244562	GCST90027503	11	130406041	0.0167816	2.89e-06	7738	0.00282154	7738	2.76591e-07	244562	TRUE	5.15684e-06	0.00307893	23.8921	42.2042	21.8892
rs2146481	A	T	A	T	-0.128056	0.0143269	0.0897767	0.0726	11158910	0.473047	0.019967	244562	GCST90027503	10	11200873	0.0288416	9e-06	7738	0.00254179	7738	2.1052e-06	244562	TRUE	2.19952e-05	0.00268004	20.7885	42.2042	19.7134
rs2398413	C	T	C	T	-0.0996063	-0.0110106	0.82363	0.8313	128437134	0.304139	0.0107149	244562	GCST90027503	12	128921679	0.0217033	4.44e-06	7738	0.00271534	7738	4.31777e-06	244562	TRUE	1.44911e-05	0.00288244	22.363	42.2042	21.0631
rs2727894	G	A	G	A	-0.105745	0.00278074	0.141778	0.1431	52426766	0.789144	0.0103983	244562	GCST90027503	2	52653904	0.0236136	7.53e-06	7738	0.00258556	7738	2.92422e-07	244562	TRUE	1.30094e-05	0.00272119	21.1085	42.2042	20.0537
rs36017242	A	G	A	G	0.162656	0.0197609	0.0622116	0.05112	75457766	0.328575	0.0202263	244562	GCST90027503	13	76031902	0.0356543	5.07e-06	7738	0.00268308	7738	3.90294e-06	244562	TRUE	1.57318e-05	0.00308707	23.9555	42.2042	20.8121
rs4517983	A	G	A	G	0.139412	0.0157374	0.909549	0.90695	84381734	0.28968	0.0148631	244562	GCST90027503	2	84608858	0.0289505	1.47e-06	7738	0.00298863	7738	4.58416e-06	244562	TRUE	5.28689e-06	0.00319794	24.8186	42.2042	23.1893
rs4867910	C	T	C	T	0.0778703	-0.00880582	0.360749	0.3456	170014156	0.266729	0.00792869	244562	GCST90027503	5	169441160	0.0175488	9.11e-06	7738	0.0025388	7738	5.04369e-06	244562	TRUE	3.01664e-05	0.00279673	21.6962	42.2042	19.6901
rs4903555	G	A	G	A	-0.0846625	0.000226456	0.291881	0.3057	77185646	0.977704	0.0081029	244562	GCST90027503	14	77651989	0.0178241	2.04e-06	7738	0.00290794	7738	3.19375e-09	244562	TRUE	3.02605e-06	0.00296295	22.9895	42.2042	22.5614
rs4936953	C	T	C	T	-0.0888945	0.0277058	0.228271	0.2423	124788812	0.00188456	0.00891479	244562	GCST90027503	11	124658708	0.0196139	5.84e-06	7738	0.00264822	7738	3.94927e-05	244562	TRUE	9.01144e-05	0.00278417	21.5985	42.2042	20.541
rs58118877	T	C	T	C	-0.0757944	-0.0146917	0.451627	0.4755	3680067	0.0566683	0.0077087	244562	GCST90027503	7	3719699	0.0167381	5.95e-06	7738	0.0026436	7738	1.48522e-05	244562	TRUE	3.75047e-05	0.00284551	22.0757	42.2042	20.5051
rs72774370	A	G	A	G	0.15156	-0.00664127	0.0715113	0.06135	23363075	0.638243	0.0141256	244562	GCST90027503	16	23374396	0.0333678	5.57e-06	7738	0.00265975	7738	9.03857e-07	244562	TRUE	1.14747e-05	0.00305036	23.6698	42.2042	20.6307
rs7529292	C	T	C	T	0.0942086	-0.000480034	0.176161	0.181	60410474	0.964464	0.0107746	244562	GCST90027503	1	60876146	0.0212479	9.26e-06	7738	0.00253472	7738	8.11631e-09	244562	TRUE	1.32849e-05	0.0025761	19.9802	42.2042	19.6584
rs76349941	T	C	T	C	0.148266	0.00916667	0.0663034	0.07464	21014744	0.550467	0.015353	244562	GCST90027503	4	21016367	0.0334848	9.52e-06	7738	0.00252797	7738	1.45764e-06	244562	TRUE	2.11122e-05	0.00272179	21.1132	42.2042	19.6059
rs9368736	C	T	C	T	-0.184482	0.00976376	0.0543789	0.07055	11484242	0.474119	0.0136405	244562	GCST90027503	6	11484475	0.0381888	1.36e-06	7738	0.00300754	7738	2.09502e-06	244562	TRUE	3.6898e-06	0.00350014	27.1722	42.2042	23.3365
rs9964901	C	T	C	T	-0.105052	0.0293342	0.83041	0.8722	3436584	0.0134974	0.0118744	244562	GCST90027503	18	3436582	0.0231719	5.8e-06	7738	0.00264982	7738	2.49533e-05	244562	TRUE	5.60755e-05	0.00310836	24.1213	42.2042	20.5535
rs1023692	C	T	C	T	-0.097125	0.0118215	0.771282	0.7607	67641624	0.179416	0.00880522	244562	GCST90027504	2	67868756	0.0198337	9.73e-07	7738	0.00309025	7738	7.37014e-06	244562	TRUE	4.57383e-06	0.00332817	25.8327	42.2042	23.9803
rs11657406	T	G	T	G	-0.10006	-0.000363237	0.166064	0.1728	7346551	0.969613	0.00953536	244562	GCST90027504	17	7249870	0.0217753	4.33e-06	7738	0.00272203	7738	5.93363e-09	244562	TRUE	6.32844e-06	0.00277306	21.512	42.2042	21.1151
rs11762494	G	A	G	A	-0.174502	-0.00924465	0.0770818	0.07566	3929671	0.541209	0.0151307	244562	GCST90027504	7	3969303	0.0321844	5.9e-08	7738	0.0037857	7738	1.52643e-06	244562	TRUE	1.71835e-07	0.00433257	33.6626	42.2042	29.3975
rs12907443	G	A	G	A	0.0834953	-0.0109765	0.382501	0.3988	23984404	0.153152	0.00768401	244562	GCST90027504	15	24229551	0.0168853	7.62e-07	7738	0.00315079	7738	8.34378e-06	244562	TRUE	3.9222e-06	0.00329324	25.5607	42.2042	24.4516
rs2367796	T	C	T	C	-0.106754	0.0108685	0.144477	0.1421	179443301	0.375098	0.0122536	244562	GCST90027504	2	180308028	0.0237448	6.93e-06	7738	0.00260604	7738	3.21681e-06	244562	TRUE	1.96423e-05	0.00281727	21.856	42.2042	20.213
rs2627353	G	A	G	A	0.13917	0.0113046	0.923649	0.91922	3886841	0.352995	0.0121712	244562	GCST90027504	8	3744363	0.0311609	7.96e-06	7738	0.0025718	7738	3.52739e-06	244562	TRUE	2.31234e-05	0.00273176	21.1908	42.2042	19.9467
rs4399424	C	T	C	T	-0.083133	-0.000271999	0.293152	0.2761	108685361	0.975873	0.00899369	244562	GCST90027504	13	109337709	0.0178931	3.38e-06	7738	0.00278259	7738	3.74002e-09	244562	TRUE	4.95696e-06	0.00286415	22.2207	42.2042	21.5862
rs56107021	T	C	T	C	-0.105362	0.00692615	0.190545	0.2065	81635667	0.471496	0.00961902	244562	GCST90027504	10	83395423	0.0207774	3.96e-07	7738	0.00331305	7738	2.12e-06	244562	TRUE	1.15334e-06	0.00342443	26.5824	42.2042	25.7149
rs74949229	A	G	A	G	0.128746	0.0206607	0.0938701	0.06442	9484983	0.188133	0.0156982	244562	GCST90027504	10	9526946	0.0283454	5.57e-06	7738	0.00265968	7738	7.08278e-06	244562	TRUE	2.24365e-05	0.00281978	21.8755	42.2042	20.6301
rs76292876	G	C	G	C	-0.148378	-0.00212722	0.0704357	0.09407	154500760	0.872589	0.0132644	244562	GCST90027504	2	155357272	0.0323585	4.53e-06	7738	0.00271061	7738	1.05164e-07	244562	TRUE	7.31922e-06	0.00288298	22.3672	42.2042	21.0263
rs111776615	A	G	A	G	-0.105552	0.0134162	0.173964	0.1575	105585942	0.265453	0.0120476	244562	GCST90027505	4	106507099	0.0237248	8.63e-06	7738	0.00255212	7738	5.07069e-06	244562	TRUE	2.87498e-05	0.003202	24.8502	42.2042	19.7937
rs11653407	T	A	T	A	0.0860567	0.00452177	0.23847	0.2219	11365423	0.625101	0.0092539	244562	GCST90027505	17	11268740	0.0190634	6.35e-06	7738	0.0026273	7738	9.76295e-07	244562	TRUE	1.32036e-05	0.0026898	20.8644	42.2042	20.3783
rs151701	T	C	T	C	0.0863005	-0.0138541	0.254949	0.2863	91057156	0.145483	0.00951732	244562	GCST90027505	1	91522713	0.0189045	4.99e-06	7738	0.00268665	7738	8.6644e-06	244562	TRUE	2.26158e-05	0.00282941	21.9504	42.2042	20.8399
rs2113567	G	T	G	T	0.0780587	-0.0129205	0.310739	0.2883	107947467	0.166462	0.0093379	244562	GCST90027505	10	109707225	0.0174853	8.04e-06	7738	0.00256958	7738	7.82837e-06	244562	TRUE	3.3126e-05	0.00261007	20.2443	42.2042	19.9295
rs2509667	A	C	A	C	-0.117625	-0.000722438	0.120838	0.1043	119490512	0.94926	0.0113526	244562	GCST90027505	11	119361224	0.0254276	3.73e-06	7738	0.0027585	7738	1.65585e-08	244562	TRUE	5.60195e-06	0.00293969	22.8085	42.2042	21.3988
rs61844177	C	T	C	T	-0.0814196	0.00107335	0.316294	0.3487	18171893	0.893616	0.00802624	244562	GCST90027505	10	18460822	0.0174091	2.91e-06	7738	0.00281944	7738	7.31262e-08	244562	TRUE	4.67852e-06	0.00286714	22.2439	42.2042	21.8728
rs73185681	A	G	A	G	-0.175127	0.0107931	0.050095	0.05419	186771052	0.565838	0.018797	244562	GCST90027505	3	186488841	0.039149	7.7e-06	7738	0.00258004	7738	1.34812e-06	244562	TRUE	1.69632e-05	0.00291884	22.6463	42.2042	20.0108
rs9599845	C	T	C	T	0.0930947	-0.00191086	0.237425	0.182	71403998	0.842934	0.00964389	244562	GCST90027505	13	71978130	0.0203682	4.86e-06	7738	0.00269313	7738	1.60534e-07	244562	TRUE	8.08301e-06	0.00313826	24.354	42.2042	20.8903
rs12417998	A	G	A	G	-0.129639	-0.00216696	0.088461	0.09305	134539758	0.845576	0.011126	244562	GCST90027506	11	134409652	0.0288032	6.77e-06	7738	0.00261179	7738	1.55111e-07	244562	TRUE	1.10772e-05	0.00271037	21.0244	42.2042	20.2577
rs12599680	T	C	T	C	-0.104456	-0.00707074	0.157329	0.1708	26478208	0.446474	0.00928764	244562	GCST90027506	16	26489529	0.0225693	3.69e-06	7738	0.0027613	7738	2.36991e-06	244562	TRUE	9.8228e-06	0.0028931	22.446	42.2042	21.4205
rs12669414	T	C	T	C	-0.0794589	-0.0017215	0.409285	0.3722	95624137	0.822703	0.00768287	244562	GCST90027506	7	95253449	0.0166763	1.89e-06	7738	0.00292615	7738	2.05296e-07	244562	TRUE	3.32995e-06	0.00305294	23.6899	42.2042	22.7031
rs138494236	C	T	C	T	-0.160724	0.000540584	0.0597053	0.05521	22459647	0.972733	0.0158154	244562	GCST90027506	1	22786140	0.0354809	5.9e-06	7738	0.00264549	7738	4.77725e-09	244562	TRUE	8.52126e-06	0.00290047	22.5033	42.2042	20.5198
rs1486114	G	T	G	T	-0.107313	-0.0159143	0.151385	0.1104	72015357	0.103569	0.00977662	244562	GCST90027506	1	72481040	0.0224958	1.84e-06	7738	0.00293298	7738	1.08345e-05	244562	TRUE	1.0383e-05	0.00295889	22.9579	42.2042	22.7563
rs17621104	A	C	A	C	0.113772	-0.0102982	0.135319	0.1391	77414191	0.437734	0.0132704	244562	GCST90027506	16	77448088	0.0250477	5.57e-06	7738	0.00265988	7738	2.46244e-06	244562	TRUE	1.46498e-05	0.00302911	23.5044	42.2042	20.6317
rs2038820	C	T	C	T	-0.0775464	-0.00519276	0.418697	0.364	52801296	0.525481	0.00817861	244562	GCST90027506	13	53375431	0.0165278	2.71e-06	7738	0.00283754	7738	1.64836e-06	244562	TRUE	6.61435e-06	0.00292722	22.7115	42.2042	22.0137
rs4399424	C	T	C	T	0.081171	-0.000271999	0.293529	0.2761	108685361	0.975873	0.00899369	244562	GCST90027506	13	109337709	0.0180444	6.85e-06	7738	0.00260895	7738	3.74002e-09	244562	TRUE	9.80637e-06	0.00273261	21.1974	42.2042	20.2356
rs62074577	G	A	G	A	0.0780376	0.00202636	0.387202	0.3793	73088151	0.792782	0.0077136	244562	GCST90027506	17	71084290	0.0176512	9.82e-06	7738	0.00252027	7738	2.82185e-07	244562	TRUE	1.67225e-05	0.00288997	22.4216	42.2042	19.5461
rs7181967	C	T	C	T	-0.0960215	-0.00514502	0.205872	0.1697	92549001	0.574534	0.00916484	244562	GCST90027506	15	93092231	0.020475	2.74e-06	7738	0.00283491	7738	1.28866e-06	244562	TRUE	6.28804e-06	0.00301477	23.3928	42.2042	21.9932
rs7228238	T	C	T	C	-0.0811856	0.0053586	0.41641	0.3712	2641315	0.51432	0.00821713	244562	GCST90027506	18	2641314	0.0166367	1.06e-06	7738	0.00306883	7738	1.73891e-06	244562	TRUE	2.76474e-06	0.00320344	24.8615	42.2042	23.8135
rs7856581	C	G	C	G	0.170656	-0.03029	0.0624905	0.07669	28572622	0.0163313	0.0126133	244562	GCST90027506	9	28572620	0.0345709	7.96e-07	7738	0.00314007	7738	2.35799e-05	244562	TRUE	9.13039e-06	0.00341242	26.4889	42.2042	24.3681
rs11254890	G	A	G	A	-0.1425	0.0201096	0.0899903	0.1033	6938040	0.184484	0.0151533	244562	GCST90027507	10	6980002	0.0297381	1.65e-06	7738	0.00295937	7738	7.20115e-06	244562	TRUE	7.36683e-06	0.00332584	25.8146	42.2042	22.9617
rs17601633	G	A	G	A	-0.0766053	0.00760412	0.360364	0.3405	61477016	0.352658	0.00818135	244562	GCST90027507	17	59554377	0.0167355	4.71e-06	7738	0.00270115	7738	3.53233e-06	244562	TRUE	1.41427e-05	0.00270534	20.9853	42.2042	20.9527
rs17674109	A	G	A	G	0.073469	0.00113772	0.45379	0.4611	31106149	0.882135	0.00767365	244562	GCST90027507	5	31106256	0.0164057	7.53e-06	7738	0.0025857	7738	8.98839e-08	244562	TRUE	1.18174e-05	0.00267579	20.7555	42.2042	20.0548
rs17773637	A	T	A	T	0.155628	-0.00845031	0.0583606	0.08487	102551582	0.509223	0.0128026	244562	GCST90027507	2	103168041	0.0346627	7.13e-06	7738	0.00259899	7738	1.78141e-06	244562	TRUE	1.6877e-05	0.00266201	20.6483	42.2042	20.1582
rs28815855	G	A	G	A	0.112889	0.0156857	0.139873	0.18	78970155	0.128151	0.0103098	244562	GCST90027507	4	79891309	0.0233702	1.36e-06	7738	0.00300714	7738	9.46491e-06	244562	TRUE	7.2317e-06	0.00306641	23.7947	42.2042	23.3334
rs55935294	C	T	C	T	-0.0776776	-0.00565685	0.436777	0.4387	153515948	0.463635	0.00771872	244562	GCST90027507	5	152895508	0.0164172	2.23e-06	7738	0.00288551	7738	2.1962e-06	244562	TRUE	5.96817e-06	0.00296867	23.034	42.2042	22.3869
rs6427759	C	A	C	A	-0.146144	0.000759066	0.9086	0.9182	199181530	0.9519	0.0125838	244562	GCST90027507	1	199150658	0.0289421	4.43e-07	7738	0.00328516	7738	1.48782e-08	244562	TRUE	7.12551e-07	0.00354741	27.5404	42.2042	25.4978
rs72809331	A	G	A	G	-0.174666	-0.0351085	0.0659944	0.06237	173774289	0.0412563	0.0172021	244562	GCST90027507	5	173201292	0.0372515	2.75e-06	7738	0.00283387	7738	1.70322e-05	244562	TRUE	2.07603e-05	0.003761	29.2049	42.2042	21.9851
rs7576999	T	C	T	C	-0.0799719	0.0140444	0.357278	0.3252	33473877	0.132178	0.0093283	244562	GCST90027507	2	33698944	0.0172594	3.59e-06	7738	0.0027676	7738	9.26854e-06	244562	TRUE	1.73967e-05	0.00293721	22.7892	42.2042	21.4696
rs77069323	G	C	G	C	0.157182	0.00424689	0.0827472	0.08793	29020374	0.785221	0.0155837	244562	GCST90027507	14	29489580	0.0306758	2.99e-07	7738	0.00338241	7738	3.0368e-07	244562	TRUE	5.9165e-07	0.0037504	29.1223	42.2042	26.2551
rs1029249	C	T	C	T	-0.0885882	-0.00928609	0.227143	0.2546	17859381	0.281149	0.00861625	244562	GCST90027508	21	19231698	0.0191712	3.82e-06	7738	0.00275258	7738	4.74944e-06	244562	TRUE	1.31004e-05	0.00275537	21.3745	42.2042	21.3527
rs10859752	A	G	A	G	0.0769656	-0.00462769	0.402186	0.4243	94785403	0.548266	0.00770819	244562	GCST90027508	12	95179179	0.016414	2.75e-06	7738	0.0028341	7738	1.4738e-06	244562	TRUE	6.51402e-06	0.0028485	22.099	42.2042	21.9869
rs10979829	A	T	A	T	0.0895778	0.0142279	0.229883	0.2117	109339653	0.183449	0.010696	244562	GCST90027508	9	112101933	0.0193862	3.82e-06	7738	0.00275234	7738	7.23522e-06	244562	TRUE	1.60314e-05	0.00284115	22.0418	42.2042	21.3509
rs12000184	A	G	A	G	-0.0857915	0.00281158	0.240929	0.2076	33857367	0.756458	0.00906565	244562	GCST90027508	9	33857365	0.019235	8.19e-06	7738	0.00256491	7738	3.93294e-07	244562	TRUE	1.45889e-05	0.00269209	20.8822	42.2042	19.8932
rs163172	G	A	G	A	0.122222	0.0166092	0.850091	0.8558	2799225	0.210493	0.0132639	244562	GCST90027508	11	2820455	0.0238	2.82e-07	7738	0.00339743	7738	6.41161e-06	244562	TRUE	1.34091e-06	0.00380734	29.5662	42.2042	26.3721
rs248756	A	T	A	T	-0.0805754	-0.000349587	0.64452	0.6595	25688285	0.964463	0.00784641	244562	GCST90027508	5	25688394	0.0168733	1.79e-06	7738	0.00293907	7738	8.11677e-09	244562	TRUE	2.71693e-06	0.002975	23.0832	42.2042	22.8037
rs631694	T	C	T	C	0.141866	0.00945258	0.919616	0.8988	93125812	0.425693	0.0118664	244562	GCST90027508	11	92858978	0.030324	2.89e-06	7738	0.00282124	7738	2.59463e-06	244562	TRUE	8.0398e-06	0.00297552	23.0873	42.2042	21.8869
rs73104513	T	C	T	C	-0.108511	0.00644571	0.144012	0.1421	14710923	0.575757	0.0115186	244562	GCST90027508	20	14691569	0.0238689	5.46e-06	7738	0.00266445	7738	1.28044e-06	244562	TRUE	1.21082e-05	0.00290298	22.5228	42.2042	20.6673
rs77054814	G	A	G	A	-0.144474	-0.00703068	0.0748263	0.06646	38393454	0.590405	0.0130621	244562	GCST90027508	9	38393451	0.0325547	9.08e-06	7738	0.0025394	7738	1.18463e-06	244562	TRUE	1.92907e-05	0.00288993	22.4213	42.2042	19.6948
rs780162	C	G	C	G	-0.0981107	-0.0151982	0.20111	0.1728	23717663	0.111336	0.00954531	244562	GCST90027508	16	23728984	0.0214092	4.59e-06	7738	0.00270731	7738	1.03661e-05	244562	TRUE	2.32938e-05	0.00309302	24.0019	42.2042	21.0006
rs78496981	T	C	T	C	-0.152002	-0.034986	0.0682182	0.06544	130559871	0.160751	0.0249446	244562	GCST90027508	12	131044416	0.0324838	2.88e-06	7738	0.00282242	7738	8.04355e-06	244562	TRUE	1.3067e-05	0.00293726	22.7896	42.2042	21.896
rs9471554	C	T	C	T	0.0766225	0.0097777	0.324334	0.3149	41322981	0.236857	0.00826602	244562	GCST90027508	6	41290719	0.017299	9.45e-06	7738	0.00252961	7738	5.72128e-06	244562	TRUE	3.30108e-05	0.00257316	19.9573	42.2042	19.6187
rs9898722	A	T	A	T	-0.0766573	0.00915268	0.331339	0.3027	13209826	0.268691	0.00827486	244562	GCST90027508	17	13113143	0.0172046	8.37e-06	7738	0.0025597	7738	5.0025e-06	244562	TRUE	2.77768e-05	0.00260385	20.196	42.2042	19.8526
rs10969036	G	A	G	A	0.0922425	0.0083612	0.443972	0.4397	29258854	0.274848	0.00765701	244562	GCST90027509	9	29258852	0.0204543	6.49e-06	7738	0.00262202	7738	4.87563e-06	244562	TRUE	2.17048e-05	0.00420092	32.6354	42.2042	20.3373
rs11627731	G	A	G	A	-0.18225	-0.0118408	0.0802933	0.04703	21980920	0.519534	0.0183845	244562	GCST90027509	14	22449161	0.0379274	1.55e-06	7738	0.0029759	7738	1.69618e-06	244562	TRUE	3.92018e-06	0.00490562	38.1369	42.2042	23.0903
rs11890644	G	A	G	A	0.119734	0.00463906	0.183125	0.1534	7496788	0.628822	0.00959702	244562	GCST90027509	2	7636919	0.0262502	5.08e-06	7738	0.00268217	7738	9.55436e-07	244562	TRUE	1.06344e-05	0.00428912	33.3236	42.2042	20.8051
rs12570677	A	T	A	T	0.144834	-0.00055073	0.119457	0.08793	127796470	0.964171	0.0122602	244562	GCST90027509	10	129594734	0.0324785	8.22e-06	7738	0.002564	7738	8.2508e-09	244562	TRUE	1.18428e-05	0.00441299	34.2902	42.2042	19.8861
rs258495	A	T	A	T	0.0975198	-0.0129481	0.61976	0.6176	75743076	0.0933835	0.00771725	244562	GCST90027509	5	75038901	0.0209483	3.24e-06	7738	0.00279355	7738	1.15106e-05	244562	TRUE	1.80995e-05	0.00448226	34.8309	42.2042	21.6715
rs4566305	G	A	G	A	-0.123803	0.00391391	0.684957	0.6902	8561147	0.629567	0.00811448	244562	GCST90027509	19	8626031	0.0249048	6.66e-07	7738	0.00318416	7738	9.51293e-07	244562	TRUE	1.53304e-06	0.00661493	51.5139	42.2042	24.7113
rs475221	A	G	A	G	-0.0948327	-0.0132467	0.515585	0.502	161537866	0.0883487	0.00777309	244562	GCST90027509	6	161958898	0.0208574	5.45e-06	7738	0.00266514	7738	1.18751e-05	244562	TRUE	2.96937e-05	0.00449225	34.9089	42.2042	20.6726
rs58529279	T	C	T	C	0.219027	-0.0236713	0.0581069	0.08589	86202374	0.0283635	0.0107979	244562	GCST90027509	16	86235980	0.0450389	1.16e-06	7738	0.00304774	7738	1.96506e-05	244562	TRUE	1.07583e-05	0.00525115	40.8374	42.2042	23.6494
rs7433679	C	T	C	T	-0.1319	-0.00304634	0.144025	0.1411	74491431	0.799796	0.0120119	244562	GCST90027509	3	74540582	0.029427	7.39e-06	7738	0.00259033	7738	2.62997e-07	244562	TRUE	1.26292e-05	0.00428962	33.3274	42.2042	20.0908
rs76729673	G	A	G	A	-0.164494	0.015036	0.0906577	0.09918	217429725	0.308253	0.0147572	244562	GCST90027509	2	218294448	0.035505	3.6e-06	7738	0.00276695	7738	4.24494e-06	244562	TRUE	1.18352e-05	0.00446131	34.6673	42.2042	21.4645
rs7673044	T	C	T	C	0.159308	0.0200076	0.0978928	0.1483	140855983	0.0561332	0.0104752	244562	GCST90027509	4	141777137	0.0342961	3.4e-06	7738	0.00278138	7738	1.49168e-05	244562	TRUE	2.27066e-05	0.00448244	34.8323	42.2042	21.5767
rs7745701	G	A	G	A	0.175902	-0.0282993	0.0845403	0.1125	143071671	0.027723	0.0128564	244562	GCST90027509	6	143392808	0.0385771	5.12e-06	7738	0.0026804	7738	1.98116e-05	244562	TRUE	4.10313e-05	0.00478933	37.2285	42.2042	20.7913
rs10140803	T	C	T	C	0.141662	0.0011592	0.0691355	0.07055	63316759	0.914425	0.0107874	244562	GCST90027510	14	63783474	0.031461	6.71e-06	7738	0.00261402	7738	4.7217e-08	244562	TRUE	1.02334e-05	0.002583	20.0338	42.2042	20.275
rs10241729	G	A	G	A	-0.0861325	-0.0120217	0.228727	0.2014	32250267	0.210894	0.00960882	244562	GCST90027510	7	32289879	0.0190947	6.46e-06	7738	0.00262332	7738	6.40035e-06	244562	TRUE	2.44492e-05	0.00261752	20.3023	42.2042	20.3474
rs12510598	A	G	A	G	-0.0815198	-0.0131232	0.275054	0.2914	135067739	0.156418	0.0092598	244562	GCST90027510	4	135988894	0.0180513	6.3e-06	7738	0.00262936	7738	8.21272e-06	244562	TRUE	2.71847e-05	0.00265021	20.5565	42.2042	20.3943
rs17543785	G	A	G	A	-0.0837133	-0.000675342	0.265156	0.2935	193486201	0.932772	0.00800569	244562	GCST90027510	1	193455331	0.018795	8.43e-06	7738	0.00255785	7738	2.90981e-08	244562	TRUE	1.25226e-05	0.00273096	21.1846	42.2042	19.8383
rs17786325	C	T	C	T	-0.0768871	-0.00507713	0.687308	0.6708	1755038	0.532105	0.00812606	244562	GCST90027510	3	1796722	0.0173451	9.3e-06	7738	0.00253358	7738	1.59621e-06	244562	TRUE	2.11135e-05	0.002541	19.7073	42.2042	19.6496
rs4678043	C	T	C	T	-0.0757748	-0.00710672	0.664659	0.6933	122202853	0.389658	0.00826134	244562	GCST90027510	3	121921700	0.0170675	9.01e-06	7738	0.00254149	7738	3.02587e-06	244562	TRUE	2.46081e-05	0.00255956	19.8516	42.2042	19.7111
rs80217121	C	T	C	T	0.141447	0.00670185	0.0857864	0.09407	38495128	0.603272	0.0128956	244562	GCST90027510	15	38787329	0.0300043	2.43e-06	7738	0.00286456	7738	1.10439e-06	244562	TRUE	5.41893e-06	0.00313822	24.3537	42.2042	22.2239
rs12156527	G	A	G	A	0.258842	0.0037812	0.071851	0.08793	3062685	0.798719	0.0148279	244562	GCST90027511	9	3062685	0.0554408	3.03e-06	7738	0.00280978	7738	2.65897e-07	244562	TRUE	5.37557e-06	0.00893614	69.7533	42.2042	21.7977
rs12670364	T	C	T	C	-0.223462	-0.00682061	0.0853551	0.1002	8289250	0.725476	0.0194237	244562	GCST90027511	7	8328880	0.0498778	7.46e-06	7738	0.00258792	7738	5.04196e-07	244562	TRUE	1.37823e-05	0.00779685	60.7904	42.2042	20.0721
rs12761356	C	T	C	T	-0.123341	0.00370399	0.454407	0.4274	14232741	0.631872	0.00773124	244562	GCST90027511	10	14274740	0.0272852	6.17e-06	7738	0.0026345	7738	9.38545e-07	244562	TRUE	1.27432e-05	0.00754325	58.7981	42.2042	20.4343
rs2042558	G	A	G	A	0.160468	0.022486	0.193068	0.1851	59994551	0.0301162	0.0103691	244562	GCST90027511	2	60221686	0.0352994	5.47e-06	7738	0.0026642	7738	1.92286e-05	244562	TRUE	4.24542e-05	0.00802332	62.5704	42.2042	20.6653
rs4868691	T	C	T	C	-0.132027	-0.00758669	0.590829	0.5951	176676363	0.330392	0.00779461	244562	GCST90027511	5	176103364	0.028598	3.9e-06	7738	0.00274753	7738	3.87372e-06	244562	TRUE	1.22817e-05	0.00842795	65.7528	42.2042	21.3135
rs4936253	A	G	A	G	-0.135675	-0.00440948	0.376581	0.3804	134826148	0.574692	0.00785787	244562	GCST90027511	11	134696042	0.0302988	7.54e-06	7738	0.00258528	7738	1.2876e-06	244562	TRUE	1.64529e-05	0.00864307	67.4457	42.2042	20.0516
rs6919931	A	G	A	G	0.185259	-0.0219442	0.133549	0.1728	50477410	0.039121	0.0106375	244562	GCST90027511	6	50445123	0.0412847	7.21e-06	7738	0.00259618	7738	1.74008e-05	244562	TRUE	5.02153e-05	0.00794279	61.9374	42.2042	20.1363
rs824634	T	C	T	C	-0.15561	-0.00706359	0.79113	0.7924	6439550	0.460862	0.00957868	244562	GCST90027511	5	6439663	0.0343526	5.9e-06	7738	0.00264539	7738	2.22358e-06	244562	TRUE	1.50175e-05	0.00800256	62.4072	42.2042	20.519
rs10404465	A	T	A	T	0.100853	-0.00963525	0.241021	0.2474	45340351	0.288692	0.00908133	244562	GCST90027512	19	45843609	0.0216345	3.14e-06	7738	0.00280123	7738	4.60298e-06	244562	TRUE	1.07535e-05	0.00372128	28.8953	42.2042	21.7312
rs10767786	T	C	T	C	0.0852294	-0.00284036	0.388995	0.364	29086008	0.728863	0.00819401	244562	GCST90027512	11	29107555	0.0188124	5.88e-06	7738	0.0026462	7738	4.91324e-07	244562	TRUE	1.09481e-05	0.00345301	26.805	42.2042	20.5253
rs10783794	G	A	G	A	0.088903	-0.0283956	0.386545	0.3773	56593395	0.000440737	0.00807977	244562	GCST90027512	12	56987179	0.0192138	3.71e-06	7738	0.00275988	7738	5.05006e-05	244562	TRUE	8.22281e-05	0.0037484	29.1067	42.2042	21.4095
rs2098065	A	G	A	G	0.0937673	-0.00160636	0.527631	0.5266	2727703	0.836384	0.00777819	244562	GCST90027512	17	2630997	0.0204054	4.32e-06	7738	0.00272215	7738	1.74398e-07	244562	TRUE	7.26678e-06	0.00438273	34.054	42.2042	21.116
rs4767337	C	A	C	A	-0.108238	0.010466	0.188831	0.1881	115603285	0.285785	0.00980501	244562	GCST90027512	12	116041090	0.0235988	4.51e-06	7738	0.00271196	7738	4.65884e-06	244562	TRUE	1.51499e-05	0.00358901	27.8646	42.2042	21.0368
rs60898162	A	G	A	G	0.090114	-0.00331515	0.332184	0.3221	72708591	0.676446	0.00794395	244562	GCST90027512	17	70704730	0.0200532	7e-06	7738	0.00260357	7738	7.12111e-07	244562	TRUE	1.36732e-05	0.00360288	27.9727	42.2042	20.1938
rs7096411	A	G	A	G	-0.0857703	0.00535546	0.424831	0.4581	132047164	0.48808	0.00772386	244562	GCST90027512	10	133860668	0.0190509	6.73e-06	7738	0.0026133	7738	1.9658e-06	244562	TRUE	1.64004e-05	0.00359514	27.9123	42.2042	20.2695
rs71505230	A	G	A	G	0.201853	-0.0222942	0.0503279	0.0501	133833534	0.271998	0.0202956	244562	GCST90027512	9	136698656	0.0430388	2.73e-06	7738	0.00283531	7738	4.93391e-06	244562	TRUE	9.74536e-06	0.00389478	30.2478	42.2042	21.9963
rs73648437	C	T	C	T	0.171367	0.00976362	0.0744602	0.08793	13955660	0.441768	0.012693	244562	GCST90027512	9	13955659	0.0357695	1.66e-06	7738	0.00295819	7738	2.41938e-06	244562	TRUE	4.66006e-06	0.00404766	31.4399	42.2042	22.9524
rs743920	G	C	G	C	-0.139891	0.0172239	0.128345	0.1155	29225139	0.155777	0.0121345	244562	GCST90027512	22	29621128	0.0312514	7.59e-06	7738	0.00258345	7738	8.23819e-06	244562	TRUE	3.23246e-05	0.00437858	34.0216	42.2042	20.0374
rs8098406	A	G	A	G	0.0833677	0.0138724	0.475509	0.4611	76063568	0.0755353	0.00780576	244562	GCST90027512	18	73775523	0.0186966	8.23e-06	7738	0.00256353	7738	1.29146e-05	244562	TRUE	4.56696e-05	0.00346675	26.9121	42.2042	19.8825
rs111364229	C	G	C	G	-0.136952	-0.00814008	0.0892174	0.1145	363382	0.477602	0.0114622	244562	GCST90027513	19	363382	0.0305024	7.13e-06	7738	0.00259909	7738	2.06221e-06	244562	TRUE	1.75511e-05	0.00304811	23.6523	42.2042	20.159
rs12359494	T	C	T	C	0.0720598	-0.00146761	0.559445	0.5348	80030480	0.849304	0.007724	244562	GCST90027513	10	81790236	0.0162967	9.79e-06	7738	0.00252101	7738	1.47622e-07	244562	TRUE	1.57414e-05	0.00255961	19.8519	42.2042	19.5518
rs12549221	C	T	C	T	0.0961229	0.00163507	0.787149	0.7771	118556717	0.871558	0.010113	244562	GCST90027513	8	119568956	0.0216562	9.06e-06	7738	0.0025402	7738	1.06887e-07	244562	TRUE	1.42761e-05	0.00309611	24.0259	42.2042	19.701
rs13080908	G	A	G	A	0.105164	-0.0004793	0.165509	0.1646	154377097	0.968811	0.0122584	244562	GCST90027513	3	154094886	0.0219949	1.74e-06	7738	0.0029464	7738	6.25113e-09	244562	TRUE	2.62773e-06	0.00305497	23.7057	42.2042	22.8607
rs1526953	C	A	C	A	0.15864	0.01322	0.0584859	0.03783	79302148	0.440503	0.0171389	244562	GCST90027513	12	79695928	0.0348064	5.17e-06	7738	0.0026781	7738	2.43282e-06	244562	TRUE	1.36128e-05	0.00277162	21.5008	42.2042	20.7734
rs237483	A	C	A	C	0.072289	-0.0143523	0.572926	0.5031	49357477	0.0623907	0.00770176	244562	GCST90027513	20	47974014	0.0163378	9.66e-06	7738	0.00252431	7738	1.41994e-05	244562	TRUE	5.62812e-05	0.00255727	19.8337	42.2042	19.5775
rs2406211	C	T	C	T	-0.0760629	0.00198932	0.416967	0.5123	76637012	0.799098	0.00781613	244562	GCST90027513	18	74348969	0.0165964	4.58e-06	7738	0.00270785	7738	2.64874e-07	244562	TRUE	7.992e-06	0.00281301	21.8228	42.2042	21.0048
rs2923143	A	G	A	G	-0.0973735	-0.00798589	0.263102	0.2607	57724251	0.355997	0.00865192	244562	GCST90027513	16	57758163	0.0189722	2.86e-07	7738	0.00339354	7738	3.48365e-06	244562	TRUE	1.01692e-06	0.00367657	28.5469	42.2042	26.3418
rs4889160	A	G	A	G	0.0891387	-0.0120475	0.228647	0.2761	80539403	0.177592	0.00893595	244562	GCST90027513	16	80573300	0.0194977	4.84e-06	7738	0.0026945	7738	7.43232e-06	244562	TRUE	2.01929e-05	0.00280273	21.7429	42.2042	20.9009
rs60152513	A	G	A	G	-0.140131	0.00426976	0.0814397	0.0818	127740872	0.813815	0.0181301	244562	GCST90027513	3	127459715	0.0305756	4.58e-06	7738	0.00270785	7738	2.2679e-07	244562	TRUE	7.86858e-06	0.00293794	22.7948	42.2042	21.0048
rs61733531	T	C	T	C	0.100089	-0.0123995	0.171229	0.1564	36135049	0.335771	0.0128819	244562	GCST90027513	3	36176541	0.0221499	6.22e-06	7738	0.0026325	7738	3.78847e-06	244562	TRUE	1.88477e-05	0.00284325	22.0581	42.2042	20.4188
rs72686468	G	A	G	A	0.152768	0.0249523	0.069932	0.08384	22146080	0.289878	0.0235757	244562	GCST90027513	14	22614034	0.0321889	2.07e-06	7738	0.00290318	7738	4.5804e-06	244562	TRUE	7.29896e-06	0.00303589	23.5571	42.2042	22.5244
rs73404911	G	A	G	A	0.0938654	0.0077626	0.229669	0.2362	98832621	0.410343	0.00942875	244562	GCST90027513	7	98430244	0.0205933	5.16e-06	7738	0.00267842	7738	2.77153e-06	244562	TRUE	1.41714e-05	0.0031176	24.1932	42.2042	20.7759
rs857044	A	T	A	T	0.0822036	0.00734695	0.282083	0.3313	56836412	0.357553	0.00798549	244562	GCST90027513	1	57302085	0.0182948	7.01e-06	7738	0.00260302	7738	3.46118e-06	244562	TRUE	2.03916e-05	0.00273692	21.231	42.2042	20.1895
rs17777155	G	A	G	A	-0.150878	0.0147462	0.115793	0.09407	18201244	0.234335	0.0123994	244562	GCST90027514	9	18201242	0.0325761	3.63e-06	7738	0.00276525	7738	5.78323e-06	244562	TRUE	1.3653e-05	0.00466142	36.2296	42.2042	21.4513
rs2197911	A	G	A	G	-0.135967	0.00713886	0.863153	0.8466	16712100	0.50845	0.010796	244562	GCST90027514	3	16753607	0.0292369	3.31e-06	7738	0.00278789	7738	1.78792e-06	244562	TRUE	8.17787e-06	0.00436737	33.9342	42.2042	21.6274
rs2636908	C	T	C	T	0.224474	0.00520718	0.0721462	0.06953	193958627	0.813508	0.0220734	244562	GCST90027514	3	193676416	0.0446249	4.9e-07	7738	0.00326019	7738	2.27552e-07	244562	TRUE	9.19119e-07	0.00674614	52.5426	42.2042	25.3033
rs4580784	A	G	A	G	-0.210802	-0.0340729	0.0617492	0.05828	27680728	0.09846	0.0206207	244562	GCST90027514	5	27680835	0.0455807	3.75e-06	7738	0.00275722	7738	1.11641e-05	244562	TRUE	2.02923e-05	0.00514908	40.0395	42.2042	21.3889
rs57070266	C	T	C	T	-0.167376	-0.0244943	0.0895804	0.1186	11084902	0.0410393	0.0119886	244562	GCST90027514	2	11225028	0.0376323	8.68e-06	7738	0.00255058	7738	1.70687e-05	244562	TRUE	5.84288e-05	0.00456952	35.5121	42.2042	19.7818
rs62385620	A	T	A	T	0.163648	-0.00255095	0.111596	0.09509	168336946	0.818104	0.0110918	244562	GCST90027514	5	167763951	0.0340993	1.59e-06	7738	0.0029684	7738	2.16277e-07	244562	TRUE	2.83946e-06	0.0053102	41.299	42.2042	23.0319
rs76618342	T	C	T	C	0.206201	0.0248103	0.0531755	0.03579	83773377	0.237333	0.0209958	244562	GCST90027514	3	83822528	0.0447123	3.99e-06	7738	0.00274169	7738	5.70967e-06	244562	TRUE	1.48295e-05	0.00428147	33.2638	42.2042	21.268
rs7840028	T	C	T	C	0.175219	-0.000834581	0.0810718	0.07362	67044895	0.956341	0.0152447	244562	GCST90027514	8	67957130	0.0375257	3.02e-06	7738	0.00281039	7738	1.22551e-08	244562	TRUE	4.53698e-06	0.0045745	35.551	42.2042	21.8024
rs7947704	T	C	T	C	0.156566	-0.0105289	0.0953912	0.06237	119541500	0.405028	0.0126447	244562	GCST90027514	11	119412210	0.0348804	7.17e-06	7738	0.00259768	7738	2.83507e-06	244562	TRUE	1.94328e-05	0.00423052	32.8664	42.2042	20.148
rs12633789	A	G	A	G	0.171793	-0.0071917	0.102012	0.1125	16348571	0.581041	0.0130316	244562	GCST90027515	3	16390078	0.037161	3.78e-06	7738	0.002755	7738	1.24532e-06	244562	TRUE	8.48749e-06	0.00540708	42.0566	42.2042	21.3716
rs13007128	T	C	T	C	0.106983	0.0051951	0.443255	0.4714	66424144	0.501896	0.00773645	244562	GCST90027515	2	66651276	0.0237458	6.63e-06	7738	0.00261699	7738	1.84382e-06	244562	TRUE	1.58925e-05	0.00564897	43.9487	42.2042	20.2981
rs1444625	G	C	G	C	-0.161047	-0.0163439	0.130907	0.1125	43277652	0.166111	0.0118023	244562	GCST90027515	13	43851788	0.0329118	9.92e-07	7738	0.00308563	7738	7.84135e-06	244562	TRUE	4.82103e-06	0.00590153	45.9252	42.2042	23.9443
rs17175056	G	A	G	A	0.152298	0.0183515	0.122605	0.1738	94127030	0.113181	0.0115851	244562	GCST90027515	13	94779284	0.0331672	4.39e-06	7738	0.00271814	7738	1.02601e-05	244562	TRUE	2.22344e-05	0.00499024	38.7981	42.2042	21.0849
rs35006616	A	G	A	G	0.107238	0.0106984	0.467335	0.4765	16029003	0.165239	0.00770964	244562	GCST90027515	7	16068628	0.022109	1.23e-06	7738	0.00303196	7738	7.87373e-06	244562	TRUE	5.90422e-06	0.00572545	44.5472	42.2042	23.5266
rs6581517	T	A	T	A	0.103616	-0.00923161	0.36771	0.3701	64000972	0.233946	0.00775599	244562	GCST90027515	12	64394752	0.0233533	9.13e-06	7738	0.00253826	7738	5.79285e-06	244562	TRUE	3.21322e-05	0.00499235	38.8146	42.2042	19.686
rs71420343	C	T	C	T	0.138554	0.023428	0.164126	0.1616	59761789	0.0212349	0.0101694	244562	GCST90027515	2	59988924	0.0301188	4.22e-06	7738	0.0027281	7738	2.17014e-05	244562	TRUE	3.73246e-05	0.00526728	40.9634	42.2042	21.1623
rs9923601	A	G	A	G	0.200457	0.0169748	0.0630599	0.06851	79311751	0.325822	0.017276	244562	GCST90027515	16	79345648	0.045196	9.2e-06	7738	0.00253643	7738	3.94761e-06	244562	TRUE	2.75789e-05	0.00474829	36.908	42.2042	19.6717
rs10504039	C	T	C	T	-0.101677	-0.00593841	0.15413	0.1677	41080132	0.54904	0.00991058	244562	GCST90027516	8	40937651	0.0226642	7.25e-06	7738	0.00259489	7738	1.4681e-06	244562	TRUE	1.6339e-05	0.00269567	20.91	42.2042	20.1263
rs11588833	G	A	G	A	-0.131667	0.005235	0.0865587	0.06953	171805343	0.702053	0.0136845	244562	GCST90027516	1	171774483	0.0297656	9.71e-06	7738	0.00252296	7738	5.98401e-07	244562	TRUE	1.81897e-05	0.00274142	21.2659	42.2042	19.567
rs11707688	T	C	T	C	-0.109234	-0.000607969	0.157658	0.1513	64413911	0.94948	0.0095955	244562	GCST90027516	3	64399587	0.0246485	9.35e-06	7738	0.00253231	7738	1.6415e-08	244562	TRUE	1.36146e-05	0.0031692	24.5949	42.2042	19.6397
rs4501561	C	T	C	T	0.105819	0.00240262	0.840069	0.8344	131156741	0.820874	0.0106113	244562	GCST90027516	8	132168988	0.0234874	6.63e-06	7738	0.002617	7738	2.09627e-07	244562	TRUE	1.11345e-05	0.00300888	23.3469	42.2042	20.2982
rs59853081	T	C	T	C	-0.0841117	-0.00940902	0.280601	0.2955	167495860	0.259054	0.00833667	244562	GCST90027516	4	168417011	0.0188956	8.53e-06	7738	0.00255484	7738	5.20853e-06	244562	TRUE	2.87874e-05	0.00285629	22.1595	42.2042	19.8149
rs7228238	T	C	T	C	-0.0837211	0.0053586	0.416673	0.3712	2641315	0.51432	0.00821713	244562	GCST90027516	18	2641314	0.0168889	7.15e-07	7738	0.00316645	7738	1.73891e-06	244562	TRUE	1.90258e-06	0.00340728	26.4488	42.2042	24.5735
rs7544236	C	T	C	T	0.0825818	0.0226775	0.360295	0.3313	199139278	0.0033833	0.00773823	244562	GCST90027516	1	199108406	0.0175279	2.46e-06	7738	0.0028612	7738	3.51161e-05	244562	TRUE	3.7394e-05	0.00314367	24.3961	42.2042	22.1977
rs7964114	C	T	C	T	0.0920566	0.0199667	0.240609	0.2638	118094597	0.0201122	0.00859061	244562	GCST90027516	12	118532402	0.0197131	3.01e-06	7738	0.002811	7738	2.20887e-05	244562	TRUE	2.81105e-05	0.00309683	24.0315	42.2042	21.8072
rs12915465	C	T	C	T	0.132221	-0.00273826	0.0932693	0.1074	55311104	0.816646	0.0118099	244562	GCST90027517	15	55603302	0.0279715	2.28e-06	7738	0.00288005	7738	2.19821e-07	244562	TRUE	4.01068e-06	0.00295698	22.943	42.2042	22.3444
rs1468579	T	C	T	C	-0.0929607	-0.00233524	0.256093	0.2566	157744279	0.808455	0.00963305	244562	GCST90027517	7	157536971	0.0193606	1.57e-06	7738	0.00297134	7738	2.40298e-07	244562	TRUE	2.83721e-06	0.00329265	25.5561	42.2042	23.0548
rs2425056	A	G	A	G	-0.0745895	0.00597829	0.344212	0.3231	35321442	0.449563	0.00790629	244562	GCST90027517	20	33909245	0.0168811	9.94e-06	7738	0.00251735	7738	2.33788e-06	244562	TRUE	2.48944e-05	0.00251174	19.4798	42.2042	19.5233
rs416270	T	G	T	G	-0.0856028	-0.018432	0.265633	0.2781	148633369	0.0649202	0.00998587	244562	GCST90027517	3	148351156	0.0187084	4.75e-06	7738	0.00269906	7738	1.3931e-05	244562	TRUE	2.92235e-05	0.00285891	22.18	42.2042	20.9364
rs6669249	C	A	C	A	-0.0853442	-0.00240412	0.756591	0.7188	95065817	0.7983	0.00940771	244562	GCST90027517	1	95531373	0.0186355	4.66e-06	7738	0.00270379	7738	2.67029e-07	244562	TRUE	8.12604e-06	0.00268272	20.8094	42.2042	20.9733
rs6806908	A	G	A	G	0.0901572	-0.00151721	0.278595	0.2679	149958272	0.870761	0.00932566	244562	GCST90027517	3	149676059	0.020315	9.08e-06	7738	0.00253949	7738	1.0823e-07	244562	TRUE	1.43275e-05	0.00326726	25.3584	42.2042	19.6955
rs76985731	C	T	C	T	0.180318	-0.000834625	0.0534186	0.06033	27241052	0.976004	0.0277477	244562	GCST90027517	13	27815189	0.0366688	8.77e-07	7738	0.00311611	7738	3.6995e-09	244562	TRUE	1.34213e-06	0.0032882	25.5215	42.2042	24.1816
rs7699343	T	C	T	C	0.0948032	0.000151165	0.173113	0.181	54844378	0.98691	0.00921366	244562	GCST90027517	4	55710544	0.0213909	9.34e-06	7738	0.00253262	7738	1.10066e-09	244562	TRUE	1.30972e-05	0.00257307	19.9566	42.2042	19.6421
rs1009644	C	T	C	T	-0.0744787	-0.0125636	0.591879	0.6043	45057115	0.116342	0.00800069	244562	GCST90027518	19	45560373	0.0165694	6.96e-06	7738	0.00260496	7738	1.00829e-05	244562	TRUE	3.34883e-05	0.00267988	20.7873	42.2042	20.2046
rs111171	G	A	G	A	-0.0924102	-0.00598628	0.729093	0.6973	20948068	0.472386	0.00833045	244562	GCST90027518	16	20959390	0.0187424	8.2e-07	7738	0.00313264	7738	2.1115e-06	244562	TRUE	2.29329e-06	0.00337344	26.1853	42.2042	24.3102
rs11543947	A	G	A	G	-0.173247	-0.0106976	0.069182	0.0593	23034812	0.512766	0.0163438	244562	GCST90027518	14	23504021	0.0339465	3.33e-07	7738	0.00335556	7738	1.75179e-06	244562	TRUE	9.25077e-07	0.00386562	30.0205	42.2042	26.046
rs12700304	T	G	T	G	0.0872428	0.0134054	0.250107	0.2076	21800878	0.169713	0.00976268	244562	GCST90027518	7	21840496	0.0187529	3.28e-06	7738	0.00278992	7738	7.70961e-06	244562	TRUE	1.44111e-05	0.00285505	22.1499	42.2042	21.6432
rs17639960	C	T	C	T	-0.109664	-0.000231621	0.156483	0.138	192582486	0.981524	0.0100016	244562	GCST90027518	2	193447212	0.0231362	2.14e-06	7738	0.0028958	7738	2.19295e-09	244562	TRUE	3.16066e-06	0.00317482	24.6386	42.2042	22.4669
rs2914928	C	T	C	T	-0.0816632	-0.00430584	0.307512	0.3252	97712762	0.650796	0.00951237	244562	GCST90027518	5	97048466	0.0177702	4.32e-06	7738	0.0027225	7738	8.37823e-07	244562	TRUE	8.87492e-06	0.00284025	22.0348	42.2042	21.1187
rs35108480	C	G	C	G	0.0804747	-0.0151357	0.297202	0.3098	174821858	0.0609158	0.00807622	244562	GCST90027518	5	174248861	0.0181741	9.51e-06	7738	0.00252812	7738	1.43614e-05	244562	TRUE	5.59401e-05	0.0027054	20.9857	42.2042	19.6071
rs7349706	C	A	C	A	0.0810335	0.0115877	0.345869	0.3487	41660985	0.149495	0.00803966	244562	GCST90027518	4	41663002	0.0176312	4.31e-06	7738	0.00272311	7738	8.49435e-06	244562	TRUE	1.95203e-05	0.00297123	23.0539	42.2042	21.1235
rs7608101	C	T	C	T	0.0836171	0.00456509	0.283873	0.2965	78156162	0.575932	0.00816162	244562	GCST90027518	2	78383288	0.0183571	5.24e-06	7738	0.00267487	7738	1.27926e-06	244562	TRUE	1.1629e-05	0.00284272	22.054	42.2042	20.7483
rs9527167	G	A	G	A	0.110794	-0.0117726	0.17668	0.1472	31083530	0.246309	0.0101544	244562	GCST90027518	13	31657667	0.0229484	1.38e-06	7738	0.00300403	7738	5.49604e-06	244562	TRUE	5.42389e-06	0.00357124	27.7261	42.2042	23.3092
rs11957688	C	T	C	T	0.15521	-0.0147006	0.060138	0.05726	22835783	0.46001	0.0198971	244562	GCST90027519	5	22835892	0.0343438	6.2e-06	7738	0.00263318	7738	2.23205e-06	244562	TRUE	1.57538e-05	0.00272322	21.1243	42.2042	20.4241
rs1467160	G	T	G	T	-0.0751674	0.00893857	0.459531	0.4519	65387491	0.24502	0.00768889	244562	GCST90027519	8	66299726	0.0166274	6.16e-06	7738	0.0026348	7738	5.52613e-06	244562	TRUE	2.18538e-05	0.00280656	21.7727	42.2042	20.4367
rs17185203	A	C	A	C	-0.0819107	-0.00294164	0.277257	0.2945	68427763	0.729946	0.00852162	244562	GCST90027519	12	68821543	0.0182028	6.8e-06	7738	0.00261068	7738	4.87247e-07	244562	TRUE	1.25551e-05	0.00268892	20.8576	42.2042	20.2491
rs2309464	G	T	G	T	0.0854547	-0.00535378	0.24989	0.2342	181320255	0.548723	0.00892781	244562	GCST90027519	4	182241408	0.019089	7.58e-06	7738	0.00258384	7738	1.47043e-06	244562	TRUE	1.70566e-05	0.00273764	21.2365	42.2042	20.0404
rs257077	T	G	T	G	-0.101168	0.00423316	0.82837	0.7618	5833880	0.699422	0.0109639	244562	GCST90027519	5	5833993	0.0220981	4.69e-06	7738	0.002702	7738	6.09559e-07	244562	TRUE	9.10197e-06	0.00291027	22.5796	42.2042	20.9593
rs56332785	T	C	T	C	0.0801429	-0.0147437	0.320611	0.2843	66202951	0.0978994	0.00890791	244562	GCST90027519	8	67115186	0.0177352	6.22e-06	7738	0.00263267	7738	1.12014e-05	244562	TRUE	3.22449e-05	0.00279806	21.7065	42.2042	20.4201
rs62248586	T	G	T	G	-0.0795788	0.00417312	0.375075	0.3671	11808501	0.597629	0.00790643	244562	GCST90027519	3	11849975	0.0172392	3.91e-06	7738	0.00274694	7738	1.13913e-06	244562	TRUE	8.58523e-06	0.00296873	23.0345	42.2042	21.3089
rs6944623	C	G	C	G	0.10404	-0.00583357	0.844165	0.8456	33180249	0.625409	0.0119492	244562	GCST90027519	7	33219861	0.0227051	4.6e-06	7738	0.00270683	7738	9.74558e-07	244562	TRUE	9.70563e-06	0.00284789	22.0942	42.2042	20.9968
rs7138789	A	G	A	G	0.119569	0.0157017	0.113296	0.1094	97396441	0.226468	0.0129819	244562	GCST90027519	12	97790219	0.0266099	7.01e-06	7738	0.00260317	7738	5.98176e-06	244562	TRUE	2.55373e-05	0.0028725	22.2857	42.2042	20.1907
rs73169038	G	A	G	A	-0.141377	0.0227372	0.0739753	0.07873	31081676	0.19946	0.0177206	244562	GCST90027519	13	31655813	0.0309812	5.04e-06	7738	0.00268458	7738	6.73173e-06	244562	TRUE	1.99141e-05	0.0027384	21.2424	42.2042	20.8239
rs77470149	A	G	A	G	0.171368	0.0155741	0.0523097	0.03988	90602718	0.439411	0.0201427	244562	GCST90027519	9	93365000	0.0365039	2.67e-06	7738	0.00284072	7738	2.44447e-06	244562	TRUE	7.32169e-06	0.00291164	22.5902	42.2042	22.0384
rs7859597	G	A	G	A	0.0846329	-0.0212391	0.257566	0.2618	15075187	0.0289781	0.00972582	244562	GCST90027519	9	15075185	0.0184862	4.69e-06	7738	0.00270204	7738	1.94996e-05	244562	TRUE	3.74383e-05	0.0027394	21.2502	42.2042	20.9596
rs79103551	T	C	T	C	0.152765	-0.0413703	0.0647766	0.06851	70791324	0.0136251	0.0167695	244562	GCST90027519	9	73406240	0.0333575	4.66e-06	7738	0.00270376	7738	2.48852e-05	244562	TRUE	4.60945e-05	0.00282756	21.936	42.2042	20.973
rs997227	A	C	A	C	-0.077565	0.00985983	0.412248	0.4376	79630953	0.201002	0.00771081	244562	GCST90027519	6	80340670	0.01695	4.74e-06	7738	0.00269961	7738	6.68575e-06	244562	TRUE	1.8757e-05	0.00291551	22.6203	42.2042	20.9407
rs12472695	T	C	T	C	0.149611	-0.0130838	0.299909	0.2975	65577132	0.122804	0.00847885	244562	GCST90027520	2	65804266	0.032136	3.23e-06	7738	0.00279391	7738	9.73653e-06	244562	TRUE	1.62511e-05	0.00939942	73.4039	42.2042	21.6742
rs12718724	T	C	T	C	-0.202477	-0.00467954	0.119583	0.136	52928208	0.704492	0.0123385	244562	GCST90027520	7	52995901	0.0448731	6.42e-06	7738	0.00262495	7738	5.88162e-07	244562	TRUE	1.22066e-05	0.00863255	67.3629	42.2042	20.3601
rs13140831	A	G	A	G	0.139782	0.00381801	0.548186	0.5501	44578787	0.621015	0.00772232	244562	GCST90027520	4	44580804	0.0315732	9.54e-06	7738	0.00252726	7738	9.99523e-07	244562	TRUE	1.95341e-05	0.00967877	75.6067	42.2042	19.6004
rs135184	T	A	T	A	0.177769	0.000998495	0.788217	0.7444	34096720	0.907873	0.00862841	244562	GCST90027520	22	34492709	0.0395527	6.97e-06	7738	0.00260442	7738	5.47577e-08	244562	TRUE	1.06972e-05	0.0105506	82.4901	42.2042	20.2004
rs3106302	T	C	T	C	0.162574	-0.00621916	0.617457	0.5777	230975395	0.417446	0.00766983	244562	GCST90027520	2	231840110	0.0358688	5.83e-06	7738	0.0026485	7738	2.68847e-06	244562	TRUE	1.57305e-05	0.0124859	97.812	42.2042	20.5432
rs4942275	T	C	T	C	0.224867	0.0119019	0.141655	0.1247	44091732	0.292503	0.0113066	244562	GCST90027520	13	44665868	0.041483	5.94e-08	7738	0.00378397	7738	4.53083e-06	244562	TRUE	2.61979e-07	0.0122963	96.3086	42.2042	29.384
rs7225041	C	G	C	G	-0.154749	0.0146631	0.317453	0.2843	601987	0.0704774	0.0081064	244562	GCST90027520	17	505227	0.0331496	3.04e-06	7738	0.00280906	7738	1.33784e-05	244562	TRUE	1.89502e-05	0.0103776	81.1231	42.2042	21.7921
rs7478946	T	C	T	C	-0.143621	-0.00959974	0.612149	0.6431	11980592	0.215966	0.00775846	244562	GCST90027520	11	12002139	0.0316509	5.69e-06	7738	0.00265456	7738	6.26009e-06	244562	TRUE	2.15072e-05	0.00979463	76.5207	42.2042	20.5904
rs76296650	G	A	G	A	-0.241937	-0.0161499	0.123104	0.1115	83300167	0.152187	0.0112791	244562	GCST90027520	16	83333772	0.045853	1.32e-07	7738	0.00358585	7738	8.38312e-06	244562	TRUE	7.78459e-07	0.0126373	99.0135	42.2042	27.84
rs884587	T	C	T	C	0.143447	0.0171117	0.343527	0.2679	110614544	0.0385798	0.00827195	244562	GCST90027520	10	112374302	0.0322801	8.84e-06	7738	0.00254618	7738	1.74975e-05	244562	TRUE	6.05085e-05	0.00928091	72.4697	42.2042	19.7475
rs1051765	G	A	G	A	-0.208775	0.0259045	0.101125	0.1104	11335000	0.0418254	0.0127279	244562	GCST90027521	10	11376999	0.0448265	3.2e-06	7738	0.00279611	7738	1.69373e-05	244562	TRUE	2.37195e-05	0.00792401	61.7897	42.2042	21.6914
rs17698956	G	A	G	A	-0.175101	0.0238215	0.148196	0.1881	23538571	0.0144208	0.00973654	244562	GCST90027521	8	23396084	0.038039	4.16e-06	7738	0.00273158	7738	2.44755e-05	244562	TRUE	4.10773e-05	0.00774076	60.3496	42.2042	21.1894
rs2636908	C	T	C	T	0.277949	0.00520718	0.0737234	0.06953	193958627	0.813508	0.0220734	244562	GCST90027521	3	193676416	0.0595021	2.99e-06	7738	0.00281272	7738	2.27552e-07	244562	TRUE	5.23058e-06	0.0105513	82.4953	42.2042	21.8205
rs4238492	G	A	G	A	0.128463	0.000955523	0.546024	0.4468	27796758	0.903219	0.00785818	244562	GCST90027521	15	28041904	0.0266247	1.4e-06	7738	0.0030003	7738	6.04579e-08	244562	TRUE	2.28491e-06	0.00818146	63.8139	42.2042	23.2802
rs62174134	T	C	T	C	-0.156658	-0.00488636	0.209295	0.1626	129438390	0.604	0.00942118	244562	GCST90027521	2	130195963	0.0333638	2.66e-06	7738	0.00284185	7738	1.09995e-06	244562	TRUE	5.90945e-06	0.00812285	63.353	42.2042	22.0472
rs6451170	A	G	A	G	0.125289	-0.00453174	0.550576	0.5726	34816617	0.559804	0.00777137	244562	GCST90027521	5	34816722	0.027247	4.26e-06	7738	0.00272575	7738	1.39043e-06	244562	TRUE	9.74415e-06	0.00776836	60.5665	42.2042	21.1441
rs77953737	T	C	T	C	-0.27245	0.00451406	0.0703799	0.06748	137512480	0.851671	0.0241411	244562	GCST90027521	7	137197226	0.0600901	5.79e-06	7738	0.00265032	7738	1.42967e-07	244562	TRUE	9.46814e-06	0.0097131	75.8775	42.2042	20.5574
rs942033	T	C	T	C	0.130758	-0.0113995	0.591911	0.5777	111952476	0.148259	0.00788506	244562	GCST90027521	13	112606790	0.0278127	2.58e-06	7738	0.00284901	7738	8.54618e-06	244562	TRUE	1.22489e-05	0.00825996	64.4312	42.2042	22.1029
rs9619066	T	C	T	C	-0.223827	0.00470799	0.124649	0.1472	17326226	0.704203	0.0124008	244562	GCST90027521	22	17807116	0.0425987	1.49e-07	7738	0.00355606	7738	5.8937e-07	244562	TRUE	3.3385e-07	0.0109327	85.5099	42.2042	27.6078
rs10253848	T	C	T	C	-0.0990509	-0.00210039	0.200092	0.2444	154907658	0.808619	0.00867184	244562	GCST90027522	7	154699368	0.0219756	6.57e-06	7738	0.00261927	7738	2.39879e-07	244562	TRUE	1.11774e-05	0.00314063	24.3724	42.2042	20.3159
rs11076031	G	A	G	A	0.0847081	-0.0110563	0.710524	0.6881	54331580	0.158444	0.00783954	244562	GCST90027522	16	54365492	0.0191672	9.9e-06	7738	0.00251838	7738	8.13297e-06	244562	TRUE	4.0941e-05	0.00295169	22.9019	42.2042	19.5314
rs1635513	C	A	C	A	-0.0905622	0.0036751	0.756081	0.7566	241906945	0.715858	0.0100964	244562	GCST90027522	1	242070247	0.020259	7.81e-06	7738	0.00257645	7738	5.41773e-07	244562	TRUE	1.45595e-05	0.00302509	23.4731	42.2042	19.9829
rs1851324	A	G	A	G	-0.161975	0.0146802	0.0702002	0.04703	216384228	0.38029	0.0167322	244562	GCST90027522	2	217248951	0.0342564	2.26e-06	7738	0.00288166	7738	3.14754e-06	244562	TRUE	6.82402e-06	0.00342495	26.5864	42.2042	22.3569
rs2122704	C	T	C	T	-0.0803788	-0.00327088	0.48886	0.5	136284284	0.671052	0.00770154	244562	GCST90027522	4	137205439	0.0173521	3.62e-06	7738	0.00276605	7738	7.37544e-07	244562	TRUE	7.3292e-06	0.00322877	25.0587	42.2042	21.4575
rs2806453	T	C	T	C	-0.188753	-0.00472478	0.0552986	0.07157	133128815	0.761048	0.0155367	244562	GCST90027522	10	134942319	0.0417029	6.01e-06	7738	0.00264113	7738	3.78147e-07	244562	TRUE	1.07896e-05	0.00372243	28.9043	42.2042	20.4859
rs651761	G	A	G	A	-0.0822431	-0.00590148	0.606234	0.5849	62936251	0.444518	0.00771853	244562	GCST90027522	18	60603484	0.0180028	4.92e-06	7738	0.0026905	7738	2.39038e-06	244562	TRUE	1.29121e-05	0.00322929	25.0627	42.2042	20.8698
rs882051	T	C	T	C	-0.168605	-0.0219551	0.0806239	0.06851	99732249	0.173177	0.016119	244562	GCST90027522	15	100272454	0.0348207	1.28e-06	7738	0.00302159	7738	7.58591e-06	244562	TRUE	6.00871e-06	0.00421432	32.74	42.2042	23.4458
rs9559715	A	G	A	G	-0.086471	0.0119248	0.391003	0.4192	110059355	0.13344	0.0079463	244562	GCST90027522	13	110711702	0.0187942	4.21e-06	7738	0.00272892	7738	9.20838e-06	244562	TRUE	2.00131e-05	0.00356095	27.646	42.2042	21.1687
rs10433369	A	T	A	T	-0.152536	-0.00243546	0.216065	0.2045	105461611	0.806018	0.00991773	244562	GCST90027523	3	105180455	0.0342642	8.52e-06	7738	0.00255526	7738	2.46577e-07	244562	TRUE	1.43892e-05	0.00788205	61.46	42.2042	19.8182
rs12719662	C	A	C	A	-0.138676	0.00727983	0.276985	0.2628	155197793	0.425422	0.00913347	244562	GCST90027523	7	154989503	0.0310384	7.9e-06	7738	0.00257376	7738	2.59767e-06	244562	TRUE	2.0707e-05	0.00770258	60.0497	42.2042	19.962
rs12921798	A	G	A	G	0.284	0.0168329	0.062306	0.06033	62371509	0.56049	0.0289169	244562	GCST90027523	16	62405413	0.0592952	1.67e-06	7738	0.00295662	7738	1.38557e-06	244562	TRUE	4.00651e-06	0.00942449	73.6015	42.2042	22.9402
rs2884357	T	C	T	C	0.124817	-0.00759506	0.541334	0.5798	11078397	0.346889	0.00807435	244562	GCST90027523	2	11218523	0.0281297	9.11e-06	7738	0.00253862	7738	3.61793e-06	244562	TRUE	2.64787e-05	0.00773641	60.3155	42.2042	19.6887
rs6009311	A	C	A	C	0.194241	0.000703403	0.122084	0.1217	49725075	0.950832	0.0114074	244562	GCST90027523	22	50118723	0.0435545	8.21e-06	7738	0.00256439	7738	1.55471e-08	244562	TRUE	1.19847e-05	0.00808767	63.0764	42.2042	19.8891
rs61861701	G	A	G	A	0.167195	0.010727	0.250813	0.1851	110605246	0.28151	0.00996069	244562	GCST90027523	10	112365004	0.0334935	5.98e-07	7738	0.00321079	7738	4.74231e-06	244562	TRUE	2.32131e-06	0.0105055	82.1334	42.2042	24.9187
rs11752725	A	G	A	G	-0.0899095	0.0177897	0.220828	0.1984	152475941	0.0791097	0.0101315	244562	GCST90027524	6	152797076	0.0195442	4.22e-06	7738	0.00272818	7738	1.26066e-05	244562	TRUE	2.44903e-05	0.00278182	21.5802	42.2042	21.1629
rs1407463	A	G	A	G	0.0864995	-0.000204555	0.243409	0.2434	8031935	0.984225	0.0103455	244562	GCST90027524	9	8031935	0.0187939	4.17e-06	7738	0.0027308	7738	1.59856e-09	244562	TRUE	6.02223e-06	0.00275585	21.3781	42.2042	21.1833
rs2582975	A	T	A	T	0.13136	0.0169368	0.0858736	0.1022	103965828	0.145669	0.0116404	244562	GCST90027524	2	104582286	0.0289197	5.57e-06	7738	0.0026599	7738	8.6564e-06	244562	TRUE	2.49753e-05	0.00270908	21.0144	42.2042	20.6319
rs295654	T	C	T	C	0.0725749	-0.00308559	0.552585	0.5716	58811344	0.68815	0.0076877	244562	GCST90027524	5	58107171	0.0163752	9.34e-06	7738	0.00253269	7738	6.58715e-07	244562	TRUE	1.77768e-05	0.00260443	20.2005	42.2042	19.6426
rs6870833	G	A	G	A	0.164484	-0.00278198	0.944468	0.9407	170841178	0.882536	0.0188283	244562	GCST90027524	5	170268182	0.0369097	8.33e-06	7738	0.00256057	7738	8.92688e-08	244562	TRUE	1.30351e-05	0.00283797	22.017	42.2042	19.8594
rs72744985	C	G	C	G	-0.0876611	0.00289426	0.211681	0.2076	17865482	0.756241	0.00932367	244562	GCST90027524	5	17865591	0.0197373	8.94e-06	7738	0.00254341	7738	3.94018e-07	244562	TRUE	1.58676e-05	0.00256465	19.8911	42.2042	19.726
rs73647057	C	T	C	T	0.156754	-0.0126871	0.0596017	0.03272	69004655	0.570815	0.0223817	244562	GCST90027524	9	71619571	0.0345735	5.79e-06	7738	0.00265022	7738	1.31387e-06	244562	TRUE	1.28658e-05	0.00275447	21.3674	42.2042	20.5566
rs74574052	A	G	A	G	0.170934	0.0156127	0.0762527	0.08282	71606827	0.219636	0.0127191	244562	GCST90027524	13	72180959	0.0316003	6.33e-08	7738	0.00376807	7738	6.16102e-06	244562	TRUE	3.27207e-07	0.00411619	31.9745	42.2042	29.26
rs12199072	A	T	A	T	-0.173948	-0.0331863	0.0531609	0.05215	40010250	0.116039	0.021116	244562	GCST90027525	6	39977989	0.0384053	5.92e-06	7738	0.00264478	7738	1.00996e-05	244562	TRUE	2.89135e-05	0.00304605	23.6363	42.2042	20.5143
rs12408719	T	C	T	C	-0.144912	0.00527301	0.0764169	0.08282	180926235	0.69533	0.0134642	244562	GCST90027525	1	180895371	0.0308402	2.62e-06	7738	0.0028459	7738	6.2715e-07	244562	TRUE	5.23502e-06	0.00296418	22.999	42.2042	22.0787
rs1447466	G	C	G	C	0.0928312	-0.0193135	0.244487	0.2505	112833413	0.0231425	0.00850413	244562	GCST90027525	11	112704136	0.019666	2.35e-06	7738	0.00287204	7738	2.10896e-05	244562	TRUE	2.16377e-05	0.00318358	24.7068	42.2042	22.2821
rs17365730	C	T	C	T	-0.157374	0.0141355	0.0926492	0.09918	163824676	0.257103	0.0124733	244562	GCST90027525	1	163793913	0.0319129	8.17e-07	7738	0.00313367	7738	5.2514e-06	244562	TRUE	3.25725e-06	0.00416402	32.3476	42.2042	24.3183
rs2325098	T	C	T	C	-0.0813327	0.0122521	0.422317	0.4029	88192216	0.113067	0.00773219	244562	GCST90027525	6	88901935	0.0162528	5.61e-07	7738	0.00322667	7738	1.02666e-05	244562	TRUE	3.37619e-06	0.00322767	25.0501	42.2042	25.0423
rs34070159	T	C	T	C	-0.116597	-0.0118117	0.140701	0.1431	148611848	0.286167	0.0110745	244562	GCST90027525	7	148308940	0.0245192	1.98e-06	7738	0.00291459	7738	4.65146e-06	244562	TRUE	7.0379e-06	0.00328735	25.5148	42.2042	22.6132
rs706948	G	T	G	T	0.0988291	0.00190097	0.170836	0.1575	117256910	0.862334	0.0109627	244562	GCST90027525	6	117578073	0.021899	6.39e-06	7738	0.00262581	7738	1.22951e-07	244562	TRUE	1.03068e-05	0.00276707	21.4654	42.2042	20.3667
rs73120083	G	A	G	A	-0.160197	-0.0160703	0.0609189	0.05215	51338657	0.390168	0.0187013	244562	GCST90027525	7	51406354	0.0357177	7.29e-06	7738	0.00259357	7738	3.01937e-06	244562	TRUE	2.01574e-05	0.00293626	22.7818	42.2042	20.116
rs7812884	A	G	A	G	0.134223	-0.0207813	0.0802829	0.1012	3724407	0.180196	0.0155067	244562	GCST90027525	8	3581929	0.0296141	5.83e-06	7738	0.00264843	7738	7.34378e-06	244562	TRUE	2.38446e-05	0.00266049	20.6364	42.2042	20.5427
rs79249788	C	T	C	T	-0.1511	-0.00414056	0.0743671	0.07873	118258400	0.778286	0.0147061	244562	GCST90027525	9	121020678	0.0326575	3.71e-06	7738	0.0027596	7738	3.24142e-07	244562	TRUE	6.67996e-06	0.00314325	24.3928	42.2042	21.4074
rs883271	G	A	G	A	0.0807466	0.0178716	0.306345	0.32	129318558	0.0355402	0.00850159	244562	GCST90027525	9	132080837	0.0175079	3.99e-06	7738	0.00274203	7738	1.8069e-05	244562	TRUE	3.04183e-05	0.00277098	21.4958	42.2042	21.2706
rs9460615	T	C	T	C	0.162344	0.012973	0.0617234	0.06442	21282060	0.602837	0.0249325	244562	GCST90027525	6	21282291	0.0346343	2.77e-06	7738	0.00283212	7738	1.10704e-06	244562	TRUE	6.14389e-06	0.00305269	23.6879	42.2042	21.9715
rs9876083	G	A	G	A	0.0831467	0.00229244	0.301164	0.2975	63185368	0.784372	0.008378	244562	GCST90027525	3	63171044	0.0175189	2.07e-06	7738	0.00290334	7738	3.06147e-07	244562	TRUE	3.7948e-06	0.00291004	22.5777	42.2042	22.5256
rs10930969	A	G	A	G	-0.0948247	-0.0180252	0.193414	0.2096	181463230	0.0605829	0.00960561	244562	GCST90027526	2	182327957	0.0209472	5.99e-06	7738	0.00264196	7738	1.43985e-05	244562	TRUE	3.6899e-05	0.00280551	21.7645	42.2042	20.4923
rs10953974	T	G	T	G	-0.113712	0.00540019	0.12518	0.135	123231956	0.605994	0.0104695	244562	GCST90027526	7	122872010	0.0245455	3.61e-06	7738	0.00276662	7738	1.08787e-06	244562	TRUE	7.88002e-06	0.00283202	21.9707	42.2042	21.4619
rs2256820	A	G	A	G	0.106214	-0.0334304	0.135999	0.1524	29972329	0.00284964	0.0112051	244562	GCST90027526	6	29940106	0.0239315	9.07e-06	7738	0.00253982	7738	3.6396e-05	244562	TRUE	0.000120477	0.00265121	20.5643	42.2042	19.6981
rs35751200	G	A	G	A	0.174336	-0.0409259	0.0586888	0.07669	133855586	0.0105385	0.0160014	244562	GCST90027526	11	133725481	0.0354376	8.67e-07	7738	0.00311869	7738	2.67474e-05	244562	TRUE	1.11872e-05	0.00335809	26.0657	42.2042	24.2017
rs36057901	A	G	A	G	-0.159157	-0.0223774	0.0551178	0.04703	12565709	0.146631	0.0154164	244562	GCST90027526	3	12607208	0.0359385	9.48e-06	7738	0.00252881	7738	8.61521e-06	244562	TRUE	4.06246e-05	0.00263846	20.4651	42.2042	19.6124
rs4802635	G	A	G	A	0.0738678	0.00540516	0.551957	0.5603	49898063	0.484016	0.00772322	244562	GCST90027526	19	50401320	0.0164053	6.71e-06	7738	0.0026139	7738	2.00278e-06	244562	TRUE	1.64473e-05	0.00269877	20.9342	42.2042	20.2741
rs4845710	A	G	A	G	0.16966	0.00873467	0.0537267	0.06237	155060538	0.627516	0.0180012	244562	GCST90027526	1	155033014	0.037583	6.35e-06	7738	0.00262734	7738	9.62725e-07	244562	TRUE	1.31654e-05	0.00292682	22.7083	42.2042	20.3787
rs59244529	T	C	T	C	0.104891	-0.00282753	0.151476	0.1595	86106633	0.795312	0.0108995	244562	GCST90027526	1	86572316	0.0232	6.15e-06	7738	0.00263535	7738	2.75181e-07	244562	TRUE	1.06445e-05	0.00282823	21.9412	42.2042	20.4409
rs61945524	T	C	T	C	-0.0852612	0.00908982	0.30013	0.3057	33726332	0.263244	0.00812493	244562	GCST90027526	13	34300469	0.0183628	3.43e-06	7738	0.00277907	7738	5.1178e-06	244562	TRUE	1.22488e-05	0.00305393	23.6976	42.2042	21.5588
rs77354939	T	C	T	C	0.163124	-0.00387138	0.0665235	0.06339	36032318	0.803042	0.015522	244562	GCST90027526	9	36032315	0.0350464	3.25e-06	7738	0.00279266	7738	2.5436e-07	244562	TRUE	5.71939e-06	0.00330479	25.6506	42.2042	21.6645
rs10096075	C	G	C	G	0.0755231	0.00149195	0.361804	0.3722	61769010	0.858973	0.00839676	244562	GCST90027527	8	62681569	0.017007	8.97e-06	7738	0.00254262	7738	1.29092e-07	244562	TRUE	1.43227e-05	0.00263401	20.4305	42.2042	19.7199
rs11859534	A	G	A	G	0.153904	0.0183706	0.0716874	0.1012	24002766	0.147728	0.0126904	244562	GCST90027527	16	24014087	0.0345524	8.42e-06	7738	0.00255808	7738	8.5686e-06	244562	TRUE	3.63104e-05	0.00315259	24.4655	42.2042	19.8401
rs12508123	T	C	T	C	0.0969126	-0.0142891	0.226339	0.2382	179399541	0.127796	0.00938312	244562	GCST90027527	4	180320695	0.0196872	8.54e-07	7738	0.00312261	7738	9.48255e-06	244562	TRUE	4.71494e-06	0.00328928	25.5298	42.2042	24.2322
rs143107308	C	T	C	T	0.0750211	-0.0056494	0.528212	0.4836	43497154	0.46803	0.00778489	244562	GCST90027527	22	43893034	0.0166577	6.68e-06	7738	0.00261507	7738	2.15335e-06	244562	TRUE	1.67117e-05	0.00280512	21.7615	42.2042	20.2832
rs17699454	C	A	C	A	0.0827054	0.00912479	0.685024	0.6554	48873036	0.263725	0.00816441	244562	GCST90027527	14	49342239	0.0178292	3.51e-06	7738	0.00277384	7738	5.1075e-06	244562	TRUE	1.24819e-05	0.00295176	22.9024	42.2042	21.5181
rs1980434	G	A	G	A	0.215529	-0.0010581	0.0728021	0.5593	22105821	0.897056	0.00817816	244562	GCST90027527	6	22106050	0.0474503	5.57e-06	7738	0.00265987	7738	6.84474e-08	244562	TRUE	8.7035e-06	0.0062713	48.821	42.2042	20.6316
rs2039970	T	C	T	C	0.0794238	0.000203437	0.633971	0.6738	60336157	0.980572	0.00835409	244562	GCST90027527	13	60910291	0.0169979	2.97e-06	7738	0.0028143	7738	2.4248e-09	244562	TRUE	4.35542e-06	0.00292763	22.7146	42.2042	21.8329
rs2703175	G	A	G	A	0.114277	-0.0053168	0.870736	0.8957	41469123	0.661857	0.0121568	244562	GCST90027527	18	39049087	0.0242361	2.42e-06	7738	0.00286569	7738	7.82121e-07	244562	TRUE	5.03763e-06	0.00293976	22.809	42.2042	22.2327
rs28493178	T	A	T	A	0.104735	-0.000806299	0.14811	0.184	68416721	0.937132	0.0102225	244562	GCST90027527	18	66083958	0.023543	8.64e-06	7738	0.00255173	7738	2.54386e-08	244562	TRUE	1.27715e-05	0.0027681	21.4735	42.2042	19.7907
rs4720493	A	G	A	G	-0.106574	0.000925623	0.133009	0.1339	708340	0.942588	0.0128528	244562	GCST90027527	7	747977	0.0241198	9.94e-06	7738	0.00251735	7738	2.12075e-08	244562	TRUE	1.45397e-05	0.00261956	20.3181	42.2042	19.5234
rs4797215	A	G	A	G	0.124319	0.00125879	0.0941791	0.1145	5593497	0.923121	0.013044	244562	GCST90027527	18	5593496	0.0278948	8.32e-06	7738	0.00256093	7738	3.808e-08	244562	TRUE	1.2493e-05	0.00263695	20.4534	42.2042	19.8623
rs7102851	C	T	C	T	-0.0927676	0.0170435	0.271372	0.3057	116398753	0.0587963	0.00901909	244562	GCST90027527	11	116269470	0.0186274	6.35e-07	7738	0.00319581	7738	1.46016e-05	244562	TRUE	4.89078e-06	0.00340325	26.4174	42.2042	24.8021
rs7186220	A	G	A	G	0.0932665	0.0046757	0.191862	0.1861	54019883	0.597518	0.00885594	244562	GCST90027527	16	54053795	0.0208733	7.89e-06	7738	0.00257415	7738	1.13982e-06	244562	TRUE	1.67309e-05	0.00269747	20.924	42.2042	19.965
rs73196427	T	C	T	C	-0.11369	0.0027002	0.125452	0.1605	18366489	0.813367	0.0114374	244562	GCST90027527	21	19738806	0.0257159	9.83e-06	7738	0.00252016	7738	2.27903e-07	244562	TRUE	1.63807e-05	0.00283619	22.0032	42.2042	19.5452
rs79328165	C	T	C	T	-0.160656	0.0253899	0.0575442	0.08896	153070387	0.0379481	0.0122337	244562	GCST90027527	2	153926901	0.0360039	8.11e-06	7738	0.00256721	7738	1.76123e-05	244562	TRUE	5.63283e-05	0.00279954	21.718	42.2042	19.9111
rs80049853	A	G	A	G	0.144856	0.0461857	0.0720914	0.04908	89941481	0.00566278	0.0166935	244562	GCST90027527	16	90007889	0.031383	3.92e-06	7738	0.00274646	7738	3.12985e-05	244562	TRUE	4.95734e-05	0.00280732	21.7786	42.2042	21.3051
rs9842222	T	C	T	C	0.0874308	0.0202398	0.232721	0.2372	146650400	0.0177472	0.00853694	244562	GCST90027527	3	146368187	0.0192148	5.36e-06	7738	0.00266919	7738	2.29833e-05	244562	TRUE	4.85549e-05	0.00272991	21.1764	42.2042	20.7041
rs11638057	A	T	A	T	-0.0744852	0.00852563	0.384199	0.3773	57567077	0.286009	0.0079909	244562	GCST90027528	15	57859275	0.016619	7.4e-06	7738	0.00258993	7738	4.65452e-06	244562	TRUE	2.4034e-05	0.00262523	20.3622	42.2042	20.0877
rs1346730	G	T	G	T	-0.0775693	0.00381517	0.582161	0.6074	136811463	0.627721	0.00786735	244562	GCST90027528	2	137569033	0.0164645	2.46e-06	7738	0.00286103	7738	9.61579e-07	244562	TRUE	5.33669e-06	0.00292726	22.7118	42.2042	22.1964
rs2339975	C	G	C	G	-0.074864	-0.00287124	0.580122	0.5818	24478776	0.710902	0.00774661	244562	GCST90027528	2	24701645	0.016338	4.6e-06	7738	0.00270679	7738	5.61734e-07	244562	TRUE	8.82261e-06	0.00273035	21.1798	42.2042	20.9966
rs505710	G	C	G	C	0.0851199	0.0228724	0.766761	0.773	8722131	0.0189644	0.00974858	244562	GCST90027528	8	8579641	0.0192342	9.62e-06	7738	0.00252522	7738	2.25085e-05	244562	TRUE	8.00846e-05	0.00259151	20.1	42.2042	19.5846
rs72626602	T	C	T	C	0.140128	-0.00699536	0.10203	0.1115	59503088	0.622643	0.0142151	244562	GCST90027528	20	58078143	0.0270826	2.29e-07	7738	0.00344868	7738	9.90228e-07	244562	TRUE	5.59388e-07	0.00359807	27.9352	42.2042	26.7713
rs880610	A	G	A	G	-0.104565	0.0104185	0.138044	0.1493	68424479	0.535932	0.0168318	244562	GCST90027528	11	68191947	0.0234042	7.9e-06	7738	0.00257365	7738	1.56661e-06	244562	TRUE	1.80117e-05	0.00260199	20.1815	42.2042	19.9611
rs963497	C	T	C	T	0.0838326	0.00018786	0.282733	0.3579	21617661	0.983172	0.00890655	244562	GCST90027528	11	21639207	0.018242	4.32e-06	7738	0.00272258	7738	1.81913e-09	244562	TRUE	6.22662e-06	0.00285045	22.1141	42.2042	21.1194
rs11021021	A	G	A	G	0.0984343	-0.00939572	0.190209	0.1963	95040995	0.282728	0.00874662	244562	GCST90027529	11	94774159	0.0217433	5.98e-06	7738	0.00264227	7738	4.71837e-06	244562	TRUE	1.98272e-05	0.00298488	23.1602	42.2042	20.4947
rs11617625	A	G	A	G	-0.117501	-0.000917488	0.105428	0.1166	112883873	0.963095	0.019829	244562	GCST90027529	13	113538187	0.0264286	8.75e-06	7738	0.00254865	7738	8.75417e-09	244562	TRUE	1.25937e-05	0.00260426	20.1992	42.2042	19.7667
rs1559831	A	G	A	G	0.156585	-0.0339255	0.940665	0.92229	38844103	0.0102176	0.0132089	244562	GCST90027529	15	39136304	0.0348368	6.96e-06	7738	0.0026048	7738	2.69724e-05	244562	TRUE	7.0837e-05	0.00273701	21.2316	42.2042	20.2034
rs1783596	T	C	T	C	0.0730932	-0.0160284	0.554655	0.5654	73234975	0.0390337	0.00776633	244562	GCST90027529	11	72946020	0.0161747	6.21e-06	7738	0.00263281	7738	1.74163e-05	244562	TRUE	4.39704e-05	0.00263939	20.4724	42.2042	20.4212
rs4784500	T	G	T	G	-0.103016	0.00495977	0.794729	0.8027	55158631	0.562003	0.00855326	244562	GCST90027529	16	55192543	0.0215544	1.76e-06	7738	0.00294402	7738	1.37491e-06	244562	TRUE	4.19731e-06	0.00346247	26.8787	42.2042	22.8422
rs6416172	T	C	T	C	-0.0807092	5.83e-05	0.287319	0.3538	16974199	0.994103	0.00788869	244562	GCST90027529	11	16995746	0.0179392	6.83e-06	7738	0.00260969	7738	2.23327e-10	244562	TRUE	9.59843e-06	0.00266769	20.6925	42.2042	20.2414
rs7716011	G	T	G	T	0.0924444	-0.00628005	0.249325	0.2505	158098845	0.508779	0.00950457	244562	GCST90027529	5	157525853	0.0186111	6.79e-07	7738	0.0031792	7738	1.78515e-06	244562	TRUE	1.82565e-06	0.00319896	24.8266	42.2042	24.6727
rs9396681	T	C	T	C	0.139791	-0.01437	0.896325	0.8937	16492858	0.249772	0.0124858	244562	GCST90027529	6	16493089	0.029043	1.49e-06	7738	0.0029858	7738	5.41614e-06	244562	TRUE	5.7686e-06	0.00363185	28.1984	42.2042	23.1673
rs11162626	T	A	T	A	0.10033	-0.00518607	0.177772	0.1943	79100438	0.566637	0.00905055	244562	GCST90027530	1	79566123	0.0212051	2.23e-06	7738	0.00288542	7738	1.34258e-06	244562	TRUE	5.22764e-06	0.00294271	22.832	42.2042	22.3862
rs2030972	A	G	A	G	-0.0743306	0.012121	0.40627	0.4131	16019555	0.114007	0.0076694	244562	GCST90027530	7	16059180	0.0163493	5.46e-06	7738	0.00266478	7738	1.02133e-05	244562	TRUE	2.70277e-05	0.00266544	20.675	42.2042	20.6698
rs2822624	G	A	G	A	0.0854587	0.00301548	0.581713	0.6339	14357816	0.699515	0.00781263	244562	GCST90027530	21	15730137	0.0165373	2.37e-07	7738	0.00344009	7738	6.09163e-07	244562	TRUE	5.24938e-07	0.00355407	27.5923	42.2042	26.7044
rs4939301	T	C	T	C	-0.0865563	0.00497249	0.555692	0.5133	59972821	0.525216	0.00782668	244562	GCST90027530	11	59740294	0.0167733	2.46e-07	7738	0.00343045	7738	1.65047e-06	244562	TRUE	6.82916e-07	0.00369952	28.7258	42.2042	26.6293
rs7242421	C	T	C	T	-0.0950062	0.00397355	0.315865	0.319	32527141	0.620617	0.00802776	244562	GCST90027530	18	30107104	0.0182749	2.01e-07	7738	0.00348147	7738	1.0018e-06	244562	TRUE	4.94491e-07	0.00390101	30.2964	42.2042	27.0268
rs8054687	G	C	G	C	0.0749253	0.0038089	0.634746	0.6779	74772470	0.641889	0.00819014	244562	GCST90027530	16	74806368	0.0166896	7.14e-06	7738	0.00259848	7738	8.84363e-07	244562	TRUE	1.44866e-05	0.00260305	20.1897	42.2042	20.1542
rs11630219	G	C	G	C	-0.0748087	0.00957266	0.405623	0.2873	27796161	0.224809	0.00788626	244562	GCST90027531	15	28041307	0.0165619	6.27e-06	7738	0.00263041	7738	6.02469e-06	244562	TRUE	2.31255e-05	0.00269848	20.9319	42.2042	20.4025
rs138449099	C	A	C	A	-0.158697	-0.00294371	0.0705568	0.06339	170204193	0.831007	0.0137937	244562	GCST90027531	6	170519417	0.0330818	1.61e-06	7738	0.00296587	7738	1.86228e-07	244562	TRUE	2.82721e-06	0.00330316	25.6379	42.2042	23.0123
rs2107539	T	C	T	C	-0.105223	0.00684324	0.243451	0.227	35995574	0.440254	0.00886701	244562	GCST90027531	17	34322610	0.0217361	1.29e-06	7738	0.00302015	7738	2.43547e-06	244562	TRUE	3.68674e-06	0.0040785	31.6804	42.2042	23.4346
rs28733370	G	C	G	C	0.0912532	-0.0280424	0.192839	0.1605	58779385	0.00207874	0.00910838	244562	GCST90027531	15	59071584	0.0203668	7.45e-06	7738	0.00258826	7738	3.87566e-05	244562	TRUE	0.000108832	0.00259228	20.106	42.2042	20.0748
rs62228654	C	G	C	G	-0.169803	0.00388839	0.0668159	0.07771	44405346	0.763635	0.0129307	244562	GCST90027531	22	44801226	0.0337315	4.8e-07	7738	0.003265	7738	3.69754e-07	244562	TRUE	9.55852e-07	0.00359557	27.9157	42.2042	25.3407
rs72729533	C	G	C	G	-0.126999	-0.0162686	0.101911	0.09509	68586171	0.399608	0.019314	244562	GCST90027531	14	69052888	0.0286659	9.41e-06	7738	0.00253077	7738	2.90114e-06	244562	TRUE	2.52825e-05	0.00295237	22.9072	42.2042	19.6277
rs7899564	A	G	A	G	-0.155414	0.0241732	0.929969	0.93252	3287151	0.281373	0.0224399	244562	GCST90027531	10	3329343	0.0318224	1.04e-06	7738	0.0030737	7738	4.74501e-06	244562	TRUE	3.89428e-06	0.00314608	24.4148	42.2042	23.8514
rs875896	A	C	A	C	0.0896551	-0.000415091	0.76106	0.7464	27161913	0.961143	0.00852005	244562	GCST90027531	7	27201532	0.0189544	2.24e-06	7738	0.00288376	7738	9.70547e-09	244562	TRUE	3.38604e-06	0.0029234	22.6817	42.2042	22.3733
rs196364	G	A	G	A	-0.175505	-0.0156259	0.357856	0.3497	38329065	0.0572559	0.00821831	244562	GCST90027532	3	38370556	0.0335734	1.72e-07	7738	0.00351998	7738	1.4782e-05	244562	TRUE	1.50577e-06	0.0141563	111.086	42.2042	27.3268
rs6940694	A	G	A	G	-0.394297	0.00350108	0.050385	0.0593	93564674	0.804552	0.014148	244562	GCST90027532	6	94274392	0.0790102	6.02e-07	7738	0.00320899	7738	2.50395e-07	244562	TRUE	1.13258e-06	0.0148774	116.829	42.2042	24.9047
rs10493855	C	A	C	A	-0.115641	0.00510797	0.114882	0.1329	91601550	0.636133	0.0107965	244562	GCST90027533	1	92067107	0.0257008	6.81e-06	7738	0.00261023	7738	9.15256e-07	244562	TRUE	1.39312e-05	0.00271961	21.0963	42.2042	20.2456
rs10764331	G	A	G	A	-0.0726991	-0.0022897	0.403507	0.454	18162907	0.765888	0.00768981	244562	GCST90027533	10	18451836	0.0162946	8.14e-06	7738	0.00256648	7738	3.62527e-07	244562	TRUE	1.43577e-05	0.00254416	19.7318	42.2042	19.9054
rs10831658	A	G	A	G	-0.0955848	-7.44e-05	0.207313	0.2352	2258142	0.993297	0.00885397	244562	GCST90027533	11	2279372	0.0199329	1.62e-06	7738	0.00296368	7738	2.88725e-10	244562	TRUE	2.39189e-06	0.00300287	23.3001	42.2042	22.9952
rs12123571	G	A	G	A	0.0750497	-0.0172178	0.484586	0.501	31546860	0.0259902	0.00773362	244562	GCST90027533	1	32012461	0.0161919	3.57e-06	7738	0.00276937	7738	2.02673e-05	244562	TRUE	3.03025e-05	0.00281355	21.8271	42.2042	21.4834
rs13142904	T	C	T	C	-0.179214	0.0206632	0.0600325	0.06851	53452247	0.125098	0.0134726	244562	GCST90027533	4	54318414	0.0355695	4.69e-07	7738	0.00327076	7738	9.61842e-06	244562	TRUE	2.74539e-06	0.00362471	28.1428	42.2042	25.3857
rs2187564	A	C	A	C	-0.0749433	0.00534643	0.416147	0.3988	77971233	0.504059	0.00800224	244562	GCST90027533	11	77682279	0.0161349	3.4e-06	7738	0.00278104	7738	1.82523e-06	244562	TRUE	8.44281e-06	0.00272927	21.1714	42.2042	21.5741
rs235996	A	G	A	G	-0.102719	-0.0198249	0.145756	0.1912	71251268	0.0408413	0.00969368	244562	GCST90027533	16	71285171	0.0225421	5.19e-06	7738	0.0026769	7738	1.71022e-05	244562	TRUE	3.69162e-05	0.00262748	20.3798	42.2042	20.7641
rs286908	A	G	A	G	-0.0828651	0.00404238	0.293175	0.3139	34637310	0.627743	0.00833642	244562	GCST90027533	11	34658857	0.0174321	2e-06	7738	0.00291247	7738	9.61456e-07	244562	TRUE	4.37604e-06	0.00284585	22.0783	42.2042	22.5966
rs371346	G	A	G	A	-0.0823282	0.010886	0.280494	0.3119	46670992	0.182971	0.00817474	244562	GCST90027533	18	44250955	0.0177066	3.33e-06	7738	0.00278675	7738	7.25103e-06	244562	TRUE	1.41093e-05	0.00273581	21.2223	42.2042	21.6186
rs3778431	G	C	G	C	-0.121881	0.0145739	0.119239	0.135	166502955	0.24748	0.0126018	244562	GCST90027533	6	166916443	0.0261913	3.26e-06	7738	0.00279143	7738	5.46887e-06	244562	TRUE	1.20504e-05	0.00312017	24.2132	42.2042	21.655
rs62483577	C	A	C	A	-0.0768044	0.00834942	0.658251	0.6718	122731594	0.308177	0.0081933	244562	GCST90027533	7	122371648	0.0172879	8.89e-06	7738	0.00254486	7738	4.24627e-06	244562	TRUE	2.74729e-05	0.002654	20.586	42.2042	19.7373
rs7251031	G	T	G	T	-0.0883793	-0.00117756	0.308299	0.2894	11156017	0.891944	0.00866842	244562	GCST90027533	19	11266693	0.0173325	3.41e-07	7738	0.00334969	7738	7.54571e-08	244562	TRUE	5.9338e-07	0.00333136	25.8575	42.2042	26.0003
rs734224	T	G	T	G	-0.104059	-0.013035	0.162338	0.1912	7701631	0.246611	0.0112505	244562	GCST90027533	4	7703358	0.0221454	2.62e-06	7738	0.00284602	7738	5.48902e-06	244562	TRUE	9.82719e-06	0.00294495	22.8494	42.2042	22.0797
rs78983051	G	A	G	A	0.125465	0.00411339	0.10593	0.1084	67184993	0.795962	0.0159078	244562	GCST90027533	10	68944751	0.0269784	3.31e-06	7738	0.00278794	7738	2.73396e-07	244562	TRUE	5.86982e-06	0.00298171	23.1355	42.2042	21.6278
rs9599845	C	T	C	T	0.0920387	-0.00191086	0.237486	0.182	71403998	0.842934	0.00964389	244562	GCST90027533	13	71978130	0.0202114	5.27e-06	7738	0.00267343	7738	1.60534e-07	244562	TRUE	8.72941e-06	0.00306801	23.8072	42.2042	20.7371
rs1035394	T	A	T	A	-0.0818655	-0.00694285	0.690265	0.6748	58717721	0.372652	0.00778768	244562	GCST90027534	5	58013548	0.017782	4.15e-06	7738	0.00273235	7738	3.24992e-06	244562	TRUE	1.21847e-05	0.00286575	22.2331	42.2042	21.1954
rs11862432	T	C	T	C	0.0808289	-0.00657304	0.345883	0.364	1061401	0.424366	0.00822793	244562	GCST90027534	16	1111401	0.0182807	9.8e-06	7738	0.00252078	7738	2.60955e-06	244562	TRUE	2.53968e-05	0.0029563	22.9377	42.2042	19.55
rs17530744	C	G	C	G	-0.0919772	0.00870774	0.217453	0.1779	22347311	0.316209	0.00868794	244562	GCST90027534	4	22348934	0.0207968	9.75e-06	7738	0.00252205	7738	4.10762e-06	244562	TRUE	2.95732e-05	0.00287916	22.3375	42.2042	19.5599
rs17772715	C	T	C	T	0.0798891	0.0103393	0.722259	0.684	48873097	0.219226	0.00841559	244562	GCST90027534	14	49342300	0.0180568	9.67e-06	7738	0.00252394	7738	6.17199e-06	244562	TRUE	3.49226e-05	0.00256058	19.8595	42.2042	19.5746
rs2213429	T	C	T	C	-0.0964336	-0.00527166	0.182428	0.137	36821128	0.609071	0.0103083	244562	GCST90027534	22	37217172	0.0216172	8.16e-06	7738	0.00256582	7738	1.06939e-06	244562	TRUE	1.70535e-05	0.00277399	21.5192	42.2042	19.9002
rs3131899	T	C	T	C	0.0763958	-0.00312404	0.366633	0.3834	94263697	0.69239	0.00789669	244562	GCST90027534	9	97025979	0.01724	9.37e-06	7738	0.0025319	7738	6.39966e-07	244562	TRUE	1.77504e-05	0.00271054	21.0257	42.2042	19.6365
rs7906344	A	G	A	G	-0.0755594	0.00486859	0.629833	0.6125	14126049	0.533161	0.00781239	244562	GCST90027534	10	14168048	0.0169008	7.79e-06	7738	0.00257706	7738	1.58801e-06	244562	TRUE	1.78355e-05	0.00266214	20.6492	42.2042	19.9877
rs79525129	T	C	T	C	0.10894	-0.0225475	0.135183	0.1431	46303270	0.0784386	0.0128124	244562	GCST90027534	19	46806527	0.0240589	5.95e-06	7738	0.00264337	7738	1.26632e-05	244562	TRUE	3.35817e-05	0.00277492	21.5265	42.2042	20.5033
rs10093578	A	G	A	G	-0.153626	-0.0127166	0.0808034	0.06135	40563332	0.518934	0.019716	244562	GCST90027535	8	40420851	0.0312936	9.15e-07	7738	0.00310564	7738	1.70106e-06	244562	TRUE	2.38656e-06	0.00350588	27.2169	42.2042	24.1001
rs10913647	C	T	C	T	-0.155118	0.00853573	0.0581311	0.07464	178942681	0.587066	0.0157169	244562	GCST90027535	1	178911816	0.0344796	6.83e-06	7738	0.00260945	7738	1.20604e-06	244562	TRUE	1.47744e-05	0.00263483	20.4369	42.2042	20.2395
rs11080532	G	A	G	A	0.0868118	-0.00214004	0.694008	0.7025	11707321	0.808218	0.00881671	244562	GCST90027535	18	11707320	0.0188477	4.11e-06	7738	0.00273486	7738	2.40905e-07	244562	TRUE	7.12422e-06	0.00320083	24.8411	42.2042	21.2149
rs11769306	A	G	A	G	0.101898	-0.00841714	0.169111	0.1575	74430846	0.412741	0.0102763	244562	GCST90027535	7	73845176	0.0229804	9.24e-06	7738	0.00253511	7738	2.74325e-06	244562	TRUE	2.44217e-05	0.00291794	22.6392	42.2042	19.6615
rs1362957	A	G	A	G	0.0888731	0.0105403	0.218086	0.2055	174243339	0.316391	0.0105203	244562	GCST90027535	3	173961129	0.0198878	7.87e-06	7738	0.00257473	7738	4.10453e-06	244562	TRUE	2.42053e-05	0.00269375	20.8951	42.2042	19.9695
rs138195517	A	G	A	G	-0.150044	0.0221842	0.0684669	0.0501	83472080	0.160464	0.0158062	244562	GCST90027535	3	83521231	0.0322521	3.28e-06	7738	0.00278992	7738	8.0546e-06	244562	TRUE	1.47643e-05	0.00287175	22.2798	42.2042	21.6432
rs1845684	T	A	T	A	0.103223	-0.000324151	0.140983	0.1493	58393546	0.9767	0.0110986	244562	GCST90027535	12	58787329	0.0231897	8.54e-06	7738	0.00255467	7738	3.48795e-09	244562	TRUE	1.21315e-05	0.00258078	20.0166	42.2042	19.8136
rs2112412	C	T	C	T	-0.0979145	0.000580047	0.832064	0.8395	92795609	0.956354	0.0105984	244562	GCST90027535	5	92131316	0.021794	7.03e-06	7738	0.00260239	7738	1.22478e-08	244562	TRUE	1.02642e-05	0.00267932	20.7829	42.2042	20.1846
rs2943246	C	T	C	T	-0.0800299	0.00784286	0.330179	0.2812	48911334	0.376994	0.00887755	244562	GCST90027535	10	50119379	0.0178628	7.46e-06	7738	0.002588	7738	3.19136e-06	244562	TRUE	2.09833e-05	0.00283298	21.9782	42.2042	20.0727
rs36054004	A	T	A	T	0.0829794	0.0027646	0.268377	0.2454	8128869	0.755844	0.00889102	244562	GCST90027535	5	8128982	0.0185245	7.48e-06	7738	0.00258706	7738	3.95345e-07	244562	TRUE	1.33917e-05	0.00270398	20.9747	42.2042	20.0654
rs3907130	T	G	T	G	-0.0755738	-0.011374	0.372901	0.3712	50622643	0.181451	0.00851156	244562	GCST90027535	18	48149013	0.0170438	9.25e-06	7738	0.00253508	7738	7.30163e-06	244562	TRUE	3.6358e-05	0.00267117	20.7195	42.2042	19.6612
rs477441	G	T	G	T	-0.0955912	0.00752013	0.808862	0.7689	172454464	0.446851	0.00988612	244562	GCST90027535	3	172172254	0.0209091	4.84e-06	7738	0.00269449	7738	2.36599e-06	244562	TRUE	1.26764e-05	0.00282545	21.9196	42.2042	20.9009
rs4807749	G	A	G	A	0.0873442	-0.0110562	0.215572	0.2444	5396995	0.206201	0.00874643	244562	GCST90027535	19	5397006	0.0196818	9.09e-06	7738	0.00253932	7738	6.53373e-06	244562	TRUE	3.38647e-05	0.00258014	20.0116	42.2042	19.6942
rs61775945	T	C	T	C	0.157204	0.0032339	0.0707767	0.08078	62639718	0.84848	0.0169263	244562	GCST90027535	1	63105389	0.032997	1.9e-06	7738	0.00292543	7738	1.49261e-07	244562	TRUE	3.247e-06	0.00325063	25.2289	42.2042	22.6975
rs6468082	C	G	C	G	-0.0787155	-0.00962278	0.695665	0.683	32104992	0.251352	0.008389	244562	GCST90027535	8	31962508	0.0175958	7.69e-06	7738	0.00258026	7738	5.38014e-06	244562	TRUE	2.65269e-05	0.00262363	20.3498	42.2042	20.0126
rs7956970	T	A	T	A	0.0751632	-0.00305433	0.632831	0.6145	17890047	0.702664	0.00800135	244562	GCST90027535	12	18042981	0.0168648	8.32e-06	7738	0.00256105	7738	5.95826e-07	244562	TRUE	1.56766e-05	0.00262539	20.3635	42.2042	19.8632
rs9640172	G	A	G	A	0.09425	0.0122108	0.204853	0.1575	151328861	0.238013	0.0103484	244562	GCST90027535	7	151025947	0.0204759	4.16e-06	7738	0.00273132	7738	5.69315e-06	244562	TRUE	1.53994e-05	0.00289389	22.4521	42.2042	21.1874
rs11143787	G	A	G	A	-0.10532	0.0034368	0.285638	0.2413	74100566	0.684471	0.00845732	244562	GCST90027536	9	76715482	0.0237885	9.54e-06	7738	0.00252739	7738	6.75238e-07	244562	TRUE	1.82182e-05	0.00452674	35.1781	42.2042	19.6014
rs113053719	A	C	A	C	0.158942	-0.00351343	0.100986	0.1012	50491538	0.787178	0.0130138	244562	GCST90027536	14	50958256	0.0341622	3.28e-06	7738	0.00279033	7738	2.98035e-07	244562	TRUE	5.87074e-06	0.00458707	35.6491	42.2042	21.6464
rs16908224	G	A	G	A	-0.108766	-0.0111831	0.230424	0.2853	10715252	0.199285	0.00871235	244562	GCST90027536	11	10736799	0.0238363	5.04e-06	7738	0.00268426	7738	6.73698e-06	244562	TRUE	1.99461e-05	0.00419561	32.594	42.2042	20.8213
rs17569415	A	G	A	G	0.0985581	0.0179716	0.340946	0.2894	151944193	0.0338127	0.00846799	244562	GCST90027536	7	151641278	0.021308	3.74e-06	7738	0.00275793	7738	1.8417e-05	244562	TRUE	2.9157e-05	0.00436537	33.9186	42.2042	21.3944
rs17645023	T	A	T	A	0.125699	-0.00239974	0.245424	0.2127	66920916	0.814918	0.0102515	244562	GCST90027536	17	64917033	0.0235802	9.78e-08	7738	0.00365982	7738	2.24061e-07	244562	TRUE	1.95239e-07	0.00585213	45.5385	42.2042	28.4164
rs6062355	T	G	T	G	-0.143298	0.0047604	0.144955	0.1411	64186309	0.620253	0.00960742	244562	GCST90027536	20	62817662	0.0309319	3.61e-06	7738	0.00276661	7738	1.00389e-06	244562	TRUE	7.75043e-06	0.00509017	39.579	42.2042	21.4618
rs608108	C	T	C	T	0.105095	-0.00774081	0.303646	0.2812	33728134	0.350616	0.00829318	244562	GCST90027536	1	34193735	0.0221999	2.2e-06	7738	0.00288861	7738	3.56241e-06	244562	TRUE	6.95981e-06	0.00467081	36.3029	42.2042	22.411
rs73852710	G	T	G	T	-0.187124	0.0115615	0.0695707	0.04397	138967130	0.459161	0.0156188	244562	GCST90027536	4	139888284	0.0400277	2.94e-06	7738	0.00281706	7738	2.24051e-06	244562	TRUE	7.80116e-06	0.00453314	35.228	42.2042	21.8543
rs778115	C	T	C	T	-0.101046	0.00854809	0.579362	0.5685	147182925	0.266825	0.00769818	244562	GCST90027536	2	147940493	0.0206887	1.04e-06	7738	0.0030741	7738	5.04167e-06	244562	TRUE	3.99857e-06	0.00497653	38.691	42.2042	23.8546
rs9569181	C	T	C	T	-0.169449	-0.00288081	0.081752	0.04908	55029865	0.837705	0.0140644	244562	GCST90027536	13	55604000	0.0373685	5.77e-06	7738	0.00265092	7738	1.71554e-07	244562	TRUE	9.58366e-06	0.00431088	33.4934	42.2042	20.5621
rs9765093	A	G	A	G	0.109305	-0.00377631	0.265378	0.2577	76452290	0.637724	0.00801963	244562	GCST90027536	5	75748115	0.0236336	3.75e-06	7738	0.00275743	7738	9.06653e-07	244562	TRUE	7.86988e-06	0.00465842	36.2062	42.2042	21.3905
rs11730684	A	C	A	C	0.0830314	0.0128995	0.385361	0.3967	7488773	0.108004	0.00802592	244562	GCST90027537	4	7490500	0.0184833	7.05e-06	7738	0.00260182	7738	1.05625e-05	244562	TRUE	3.48497e-05	0.0032659	25.3478	42.2042	20.1802
rs117829634	G	A	G	A	-0.174867	0.026565	0.0747059	0.05624	56048856	0.0730432	0.0148196	244562	GCST90027537	14	56515574	0.0362802	1.44e-06	7738	0.00299404	7738	1.31388e-05	244562	TRUE	9.4718e-06	0.00422747	32.8425	42.2042	23.2315
rs2239926	C	G	C	G	0.0965996	0.00882764	0.276888	0.2781	18596938	0.298507	0.00849105	244562	GCST90027537	7	18636561	0.0198604	1.15e-06	7738	0.00304882	7738	4.41956e-06	244562	TRUE	4.14441e-06	0.00373672	29.0157	42.2042	23.6578
rs2948520	T	C	T	C	0.0801306	-0.0125078	0.501949	0.5051	27575725	0.103708	0.007687	244562	GCST90027537	17	25902751	0.0180433	8.95e-06	7738	0.00254298	7738	1.08258e-05	244562	TRUE	4.40073e-05	0.00321041	24.9157	42.2042	19.7226
rs6105464	A	C	A	C	-0.0847624	0.0104098	0.323442	0.3415	15765875	0.192929	0.00799547	244562	GCST90027537	20	15746520	0.0188444	6.86e-06	7738	0.0026085	7738	6.93121e-06	244562	TRUE	2.68873e-05	0.0031444	24.4018	42.2042	20.2321
rs11732315	A	G	A	G	0.346719	0.0328695	0.0608812	0.0818	188491349	0.0250127	0.014666	244562	GCST90027538	4	189412503	0.0709011	1.01e-06	7738	0.00308171	7738	2.05385e-05	244562	TRUE	9.89668e-06	0.0137464	107.824	42.2042	23.9138
rs12028490	T	C	T	C	-0.274747	-0.0358727	0.0871635	0.09611	226490862	0.00416812	0.0125204	244562	GCST90027538	1	226678563	0.0600411	4.74e-06	7738	0.00269947	7738	3.35656e-05	244562	TRUE	6.29967e-05	0.0120122	94.0564	42.2042	20.9396
rs2127754	A	G	A	G	-0.161332	0.00189321	0.368415	0.3824	49514629	0.80675	0.00773936	244562	GCST90027538	6	49482342	0.0352874	4.83e-06	7738	0.00269472	7738	2.44682e-07	244562	TRUE	8.34386e-06	0.0121127	94.8526	42.2042	20.9027
rs4507010	G	A	G	A	0.177948	0.0176491	0.724424	0.7014	66943102	0.0648261	0.00955837	244562	GCST90027538	18	64610339	0.0399342	8.35e-06	7738	0.00256016	7738	1.39408e-05	244562	TRUE	4.87111e-05	0.012643	99.0587	42.2042	19.8562
rs6438382	A	G	A	G	-0.161494	0.00572558	0.492623	0.5266	117116352	0.498164	0.00845252	244562	GCST90027538	3	116835199	0.035435	5.18e-06	7738	0.00267773	7738	1.87621e-06	244562	TRUE	1.26448e-05	0.0130373	102.189	42.2042	20.7705
rs675403	G	A	G	A	0.174413	0.00648195	0.253467	0.2505	3746141	0.444136	0.00847062	244562	GCST90027538	11	3767371	0.0387138	6.63e-06	7738	0.00261681	7738	2.39439e-06	244562	TRUE	1.71278e-05	0.0115122	90.0955	42.2042	20.2967
rs77267984	T	C	T	C	-0.302329	-0.0224902	0.0771424	0.07464	154316310	0.170348	0.0164032	244562	GCST90027538	6	154637444	0.0675211	7.55e-06	7738	0.00258488	7738	7.68672e-06	244562	TRUE	3.0983e-05	0.0130142	102.005	42.2042	20.0484
rs9927590	T	C	T	C	-0.339265	-0.0319327	0.0843884	0.0593	78284846	0.0467455	0.0160579	244562	GCST90027538	16	78318743	0.0590702	9.28e-09	7738	0.00424597	7738	1.61697e-05	244562	TRUE	1.14464e-07	0.017787	140.092	42.2042	32.9869
rs10748397	G	T	G	T	0.0837637	-0.00767118	0.758401	0.7403	44539770	0.416058	0.00943241	244562	GCST90027539	12	44933553	0.0189395	9.75e-06	7738	0.0025221	7738	2.70454e-06	244562	TRUE	2.55531e-05	0.0025712	19.9421	42.2042	19.5603
rs111440229	G	A	G	A	-0.162824	0.0160296	0.0553672	0.06033	76807664	0.42818	0.0202315	244562	GCST90027539	4	77728817	0.0365826	8.55e-06	7738	0.00255423	7738	2.56687e-06	244562	TRUE	2.2231e-05	0.00277321	21.5132	42.2042	19.8101
rs11162626	T	A	T	A	0.0987969	-0.00518607	0.177772	0.1943	79100438	0.566637	0.00905055	244562	GCST90027539	1	79566123	0.0212097	3.19e-06	7738	0.00279695	7738	1.34258e-06	244562	TRUE	7.34737e-06	0.00285346	22.1376	42.2042	21.6979
rs1750832	T	C	T	C	-0.0738116	-0.00153077	0.499391	0.5143	7526844	0.842617	0.00770986	244562	GCST90027539	1	7586904	0.0162445	5.53e-06	7738	0.00266172	7738	1.61191e-07	244562	TRUE	9.14107e-06	0.00272407	21.131	42.2042	20.646
rs1882884	C	T	C	T	0.0851875	0.00748504	0.498268	0.5511	14393813	0.331364	0.00770565	244562	GCST90027539	21	15766134	0.0162795	1.67e-07	7738	0.00352711	7738	3.85818e-06	244562	TRUE	6.40729e-07	0.00362841	28.1716	42.2042	27.3823
rs1962815	A	G	A	G	0.0771051	-0.00777615	0.382817	0.3947	148530494	0.318343	0.00779276	244562	GCST90027539	7	148227586	0.0167663	4.25e-06	7738	0.0027264	7738	4.07155e-06	244562	TRUE	1.35708e-05	0.00280932	21.7941	42.2042	21.1491
rs289852	C	G	C	G	-0.0741851	0.00442596	0.37541	0.364	151166811	0.595118	0.00832833	244562	GCST90027539	2	152023325	0.0166741	8.62e-06	7738	0.00255224	7738	1.15482e-06	244562	TRUE	1.82585e-05	0.00258086	20.0172	42.2042	19.7947
rs3734447	G	T	G	T	-0.0755862	-0.0171249	0.597407	0.5603	127450307	0.0283674	0.00781186	244562	GCST90027539	6	127771452	0.016448	4.32e-06	7738	0.00272244	7738	1.96496e-05	244562	TRUE	3.49913e-05	0.00274822	21.3188	42.2042	21.1183
rs4939301	T	C	T	C	-0.0833505	0.00497249	0.555692	0.5133	59972821	0.525216	0.00782668	244562	GCST90027539	11	59740294	0.0167769	6.76e-07	7738	0.00318048	7738	1.65047e-06	244562	TRUE	1.77698e-06	0.00343056	26.6301	42.2042	24.6827
rs56166050	T	C	T	C	0.101884	0.00704365	0.194657	0.271	5303349	0.460681	0.00954779	244562	GCST90027539	7	5342980	0.0220273	3.74e-06	7738	0.00275787	7738	2.22538e-06	244562	TRUE	9.7641e-06	0.00325456	25.2595	42.2042	21.3939
rs6873153	T	C	T	C	-0.0897738	-0.00108122	0.211044	0.2495	25463587	0.901312	0.00871923	244562	GCST90027539	5	25463696	0.0198525	6.13e-06	7738	0.00263637	7738	6.28763e-08	244562	TRUE	9.50134e-06	0.00268383	20.818	42.2042	20.4488
rs6882828	T	G	T	G	0.0951708	0.00451402	0.178837	0.2137	82713836	0.690556	0.0113389	244562	GCST90027539	5	82009655	0.0211272	6.65e-06	7738	0.00261619	7738	6.48037e-07	244562	TRUE	1.2821e-05	0.00266026	20.6347	42.2042	20.2919
rs7242421	C	T	C	T	-0.0855779	0.00397355	0.315865	0.319	32527141	0.620617	0.00802776	244562	GCST90027539	18	30107104	0.0182788	2.84e-06	7738	0.00282542	7738	1.0018e-06	244562	TRUE	6.17392e-06	0.00316517	24.5635	42.2042	21.9194
rs7557745	C	T	C	T	-0.148732	0.00165179	0.930722	0.93967	106914996	0.927307	0.0181051	244562	GCST90027539	2	107531452	0.0321656	3.77e-06	7738	0.0027562	7738	3.40349e-08	244562	TRUE	5.78362e-06	0.00285269	22.1315	42.2042	21.3809
rs76301358	A	G	A	G	0.0962915	0.00341036	0.171596	0.1493	49810081	0.752917	0.0108336	244562	GCST90027539	17	47887443	0.0215321	7.75e-06	7738	0.00257849	7738	4.05202e-07	244562	TRUE	1.38888e-05	0.00263606	20.4465	42.2042	19.9988
rs8054687	G	C	G	C	0.0763275	0.0038089	0.634746	0.6779	74772470	0.641889	0.00819014	244562	GCST90027539	16	74806368	0.0166932	4.82e-06	7738	0.00269522	7738	8.84363e-07	244562	TRUE	9.96241e-06	0.00270139	20.9545	42.2042	20.9066
rs805719	A	G	A	G	-0.0969086	-0.00270297	0.827742	0.7996	104045552	0.760142	0.00885365	244562	GCST90027539	10	105805310	0.0219057	9.69e-06	7738	0.00252346	7738	3.81111e-07	244562	TRUE	1.70811e-05	0.00267811	20.7735	42.2042	19.5709
rs1034938	G	A	G	A	-0.0898387	0.0150452	0.218123	0.2403	115729688	0.110272	0.00942108	244562	GCST90027540	10	117489198	0.0197539	5.42e-06	7738	0.00266652	7738	1.04281e-05	244562	TRUE	2.7199e-05	0.00275294	21.3555	42.2042	20.6834
rs11249616	A	G	A	G	-0.0960622	-0.0190415	0.219036	0.1984	179190694	0.0671151	0.0104001	244562	GCST90027540	5	178617695	0.0204511	2.64e-06	7738	0.00284393	7738	1.37069e-05	244562	TRUE	1.69628e-05	0.00315705	24.5003	42.2042	22.0634
rs117996720	A	C	A	C	-0.167688	-0.0100983	0.0608325	0.07055	32438611	0.440336	0.013087	244562	GCST90027540	11	32460157	0.0368444	5.33e-06	7738	0.00267044	7738	2.4346e-06	244562	TRUE	1.40204e-05	0.00321301	24.936	42.2042	20.7139
rs1187244	C	T	C	T	-0.0863736	0.00114917	0.304888	0.3088	37742675	0.883598	0.007849	244562	GCST90027540	18	35322638	0.01771	1.08e-06	7738	0.00306532	7738	8.76504e-08	244562	TRUE	1.81177e-06	0.00316218	24.5403	42.2042	23.7862
rs12280724	T	G	T	G	-0.137533	0.00119931	0.0762468	0.07157	116742707	0.93651	0.0150559	244562	GCST90027540	11	116613423	0.0304651	6.35e-06	7738	0.00262754	7738	2.59456e-08	244562	TRUE	9.48827e-06	0.00266453	20.6679	42.2042	20.3802
rs2624881	C	T	C	T	0.128454	0.00309572	0.0879416	0.07771	176248279	0.824665	0.0139731	244562	GCST90027540	4	177169430	0.0284322	6.25e-06	7738	0.00263156	7738	2.00703e-07	244562	TRUE	1.04775e-05	0.00264693	20.531	42.2042	20.4115
rs3812328	A	G	A	G	-0.0772099	7.45e-05	0.347247	0.3701	29477820	0.9927	0.00814583	244562	GCST90027540	7	29517436	0.017091	6.25e-06	7738	0.00263118	7738	3.42024e-10	244562	TRUE	8.83246e-06	0.00270249	20.9631	42.2042	20.4085
rs4533457	G	T	G	T	0.0949563	0.00856112	0.813065	0.8037	67560216	0.382877	0.00981096	244562	GCST90027540	2	67787348	0.0210722	6.6e-06	7738	0.00261802	7738	3.11352e-06	244562	TRUE	1.8555e-05	0.0027409	21.2619	42.2042	20.3062
rs4816116	G	A	G	A	-0.113439	0.0140578	0.127913	0.1728	978696	0.294823	0.0134191	244562	GCST90027540	20	959339	0.0250079	5.73e-06	7738	0.00265277	7738	4.48749e-06	244562	TRUE	1.86597e-05	0.00287097	22.2738	42.2042	20.5764
rs602386	G	C	G	C	-0.0971919	0.0301682	0.18448	0.1656	9345864	0.00304355	0.0101806	244562	GCST90027540	1	9405923	0.0214695	5.98e-06	7738	0.00264211	7738	3.59047e-05	244562	TRUE	8.28761e-05	0.00284233	22.0509	42.2042	20.4935
rs72729533	C	G	C	G	-0.132623	-0.0162686	0.101911	0.09509	68586171	0.399608	0.019314	244562	GCST90027540	14	69052888	0.0288696	4.35e-06	7738	0.00272055	7738	2.90114e-06	244562	TRUE	1.22516e-05	0.00321965	24.9876	42.2042	21.1036
rs75331157	G	C	G	C	0.159162	0.0167558	0.057573	0.06135	63087700	0.283891	0.015636	244562	GCST90027540	1	63553371	0.035794	8.72e-06	7738	0.00254937	7738	4.69563e-06	244562	TRUE	2.81256e-05	0.002749	21.3249	42.2042	19.7724
rs7595525	C	A	C	A	-0.0912273	0.00749083	0.200693	0.2587	49027676	0.388513	0.00868686	244562	GCST90027540	2	49254815	0.0203954	7.72e-06	7738	0.00257957	7738	3.04052e-06	244562	TRUE	2.13136e-05	0.00267009	20.7111	42.2042	20.0071
rs80315336	A	G	A	G	0.156289	0.0138219	0.0654592	0.0409	38310408	0.477654	0.0194652	244562	GCST90027540	9	38310405	0.034934	7.68e-06	7738	0.00258061	7738	2.06172e-06	244562	TRUE	1.88404e-05	0.00298852	23.1885	42.2042	20.0152
rs9954361	A	T	A	T	0.0961991	0.000784201	0.195492	0.1912	5327490	0.932416	0.00924705	244562	GCST90027540	18	5327489	0.0215077	7.72e-06	7738	0.00257938	7738	2.94078e-08	244562	TRUE	1.15111e-05	0.00291093	22.5847	42.2042	20.0057
rs10015335	A	T	A	T	-0.079337	0.0178984	0.338509	0.3303	13234242	0.0499379	0.00912953	244562	GCST90027541	4	13235866	0.0174319	5.33e-06	7738	0.00267045	7738	1.57159e-05	244562	TRUE	3.54364e-05	0.00281887	21.8685	42.2042	20.7139
rs11072921	G	A	G	A	-0.0856555	-0.0155204	0.371678	0.4162	80507815	0.0426904	0.00765787	244562	GCST90027541	15	80800156	0.0169685	4.47e-07	7738	0.00328306	7738	1.67957e-05	244562	TRUE	3.98788e-06	0.00342681	26.6009	42.2042	25.4814
rs116856824	T	G	T	G	-0.171955	-0.00297412	0.0546963	0.06953	88902758	0.801579	0.0118347	244562	GCST90027541	14	89369102	0.037782	5.33e-06	7738	0.00267043	7738	2.58234e-07	244562	TRUE	9.22256e-06	0.00305766	23.7266	42.2042	20.7138
rs12189770	G	A	G	A	-0.0917168	-0.000220811	0.258698	0.2996	138347845	0.979162	0.00845387	244562	GCST90027541	6	138668982	0.0207282	9.66e-06	7738	0.00252441	7738	2.78962e-09	244562	TRUE	1.36331e-05	0.00322638	25.0401	42.2042	19.5783
rs17793651	T	C	T	C	-0.173607	0.00840561	0.0526319	0.04908	142558776	0.666791	0.0195227	244562	GCST90027541	2	143316345	0.0375448	3.76e-06	7738	0.00275626	7738	7.58009e-07	244562	TRUE	7.64886e-06	0.00300561	23.3215	42.2042	21.3813
rs2596115	G	A	G	A	0.0912775	0.0109456	0.797058	0.7832	80658170	0.345758	0.0116091	244562	GCST90027541	14	81124514	0.0204376	7.96e-06	7738	0.00257177	7738	3.63494e-06	244562	TRUE	2.33796e-05	0.00269538	20.9078	42.2042	19.9465
rs34025630	T	C	T	C	-0.100746	0.0148141	0.182399	0.2055	11746897	0.126709	0.00970011	244562	GCST90027541	11	11768444	0.0216268	3.19e-06	7738	0.00279729	7738	9.53691e-06	244562	TRUE	1.58468e-05	0.00302726	23.49	42.2042	21.7006
rs4744061	A	G	A	G	-0.0994209	0.0187457	0.176991	0.1912	91575593	0.039453	0.00910237	244562	GCST90027541	9	94337875	0.021482	3.69e-06	7738	0.00276114	7738	1.73421e-05	244562	TRUE	2.74546e-05	0.00287966	22.3414	42.2042	21.4193
rs4798876	A	G	A	G	-0.0777825	0.00371755	0.468011	0.4366	9868913	0.631236	0.00774509	244562	GCST90027541	18	9868910	0.016781	3.57e-06	7738	0.00276954	7738	9.42052e-07	244562	TRUE	7.56647e-06	0.00301268	23.3765	42.2042	21.4846
rs57592260	T	G	T	G	-0.0899785	0.00851388	0.287597	0.3425	29276918	0.29872	0.00819287	244562	GCST90027541	3	29318409	0.0183466	9.37e-07	7738	0.00309957	7738	4.41566e-06	244562	TRUE	3.41999e-06	0.00331755	25.75	42.2042	24.0528
rs67560429	G	A	G	A	0.0776668	-0.000831016	0.333713	0.3231	180209575	0.924449	0.00876312	244562	GCST90027541	5	179636575	0.017482	8.88e-06	7738	0.00254487	7738	3.67719e-08	244562	TRUE	1.32888e-05	0.00268247	20.8074	42.2042	19.7373
rs680138	T	C	T	C	-0.0767407	0.00346386	0.617861	0.638	108120700	0.668461	0.0080882	244562	GCST90027541	9	110882980	0.0170434	6.71e-06	7738	0.00261388	7738	7.49949e-07	244562	TRUE	1.32523e-05	0.00278095	21.5734	42.2042	20.274
rs10810562	C	T	C	T	-0.119688	0.00920173	0.857462	0.8804	16397157	0.432371	0.0117198	244562	GCST90027542	9	16397155	0.0231574	2.36e-07	7738	0.00344119	7738	2.52063e-06	244562	TRUE	7.50252e-07	0.00350168	27.1842	42.2042	26.7129
rs111831915	A	G	A	G	0.127343	0.00277291	0.091669	0.1145	21335792	0.843726	0.0140664	244562	GCST90027542	5	21335901	0.0287575	9.5e-06	7738	0.00252832	7738	1.58898e-07	244562	TRUE	1.53838e-05	0.00270052	20.9478	42.2042	19.6087
rs153114	C	T	C	T	-0.0876991	0.0059906	0.271122	0.2853	107437494	0.452135	0.0079677	244562	GCST90027542	5	106773195	0.0182213	1.49e-06	7738	0.0029855	7738	2.31147e-06	244562	TRUE	4.13797e-06	0.00303976	23.5873	42.2042	23.165
rs17042641	C	G	C	G	-0.0893593	0.00526971	0.251995	0.2014	66311	0.572315	0.00933278	244562	GCST90027542	3	107994	0.0186885	1.74e-06	7738	0.00294668	7738	1.30366e-06	244562	TRUE	4.10177e-06	0.00301027	23.3578	42.2042	22.8629
rs1887496	G	A	G	A	-0.0749804	0.00331563	0.406246	0.4325	33390406	0.666976	0.00770536	244562	GCST90027542	14	33859612	0.0163068	4.26e-06	7738	0.00272556	7738	7.57113e-07	244562	TRUE	8.61203e-06	0.0027122	21.0386	42.2042	21.1426
rs1904729	A	G	A	G	0.0773397	0.00897346	0.596126	0.5245	65695484	0.242058	0.00767055	244562	GCST90027542	10	67455242	0.0166746	3.51e-06	7738	0.00277314	7738	5.59601e-06	244562	TRUE	1.30494e-05	0.00288018	22.3454	42.2042	21.5127
rs1997943	A	G	A	G	0.0858536	0.00123819	0.245532	0.2382	7404163	0.88971	0.00892897	244562	GCST90027542	20	7384810	0.0187379	4.61e-06	7738	0.00270634	7738	7.86297e-08	244562	TRUE	7.31116e-06	0.00273084	21.1836	42.2042	20.993
rs76878083	T	C	T	C	0.139461	0.0184808	0.0879141	0.091	45043724	0.0871144	0.0108023	244562	GCST90027542	21	46463639	0.0307677	5.82e-06	7738	0.00264879	7738	1.19679e-05	244562	TRUE	3.17044e-05	0.0031191	24.2049	42.2042	20.5454
rs77090789	C	T	C	T	-0.122242	-0.00830533	0.110354	0.1033	74290080	0.480981	0.0117852	244562	GCST90027542	18	71957315	0.0257831	2.12e-06	7738	0.0028973	7738	2.03074e-06	244562	TRUE	5.57312e-06	0.00293411	22.7651	42.2042	22.4787
rs10786832	T	C	T	C	0.085438	0.00242084	0.372798	0.4049	104858690	0.753336	0.0077037	244562	GCST90027543	10	106618448	0.0186763	4.77e-06	7738	0.00269793	7738	4.03782e-07	244562	TRUE	8.72156e-06	0.0034136	26.4981	42.2042	20.9277
rs11708774	G	A	G	A	-0.0874978	-0.00941073	0.370633	0.3957	110581760	0.247098	0.00813073	244562	GCST90027543	3	110300607	0.0187245	2.97e-06	7738	0.00281471	7738	5.47771e-06	244562	TRUE	1.1047e-05	0.00357168	27.7295	42.2042	21.836
rs118145836	A	G	A	G	-0.128246	0.0143137	0.125925	0.1012	94418330	0.320483	0.0144078	244562	GCST90027543	14	94884667	0.0279642	4.52e-06	7738	0.00271136	7738	4.0357e-06	244562	TRUE	1.4317e-05	0.00362058	28.1106	42.2042	21.0321
rs12468621	G	C	G	C	-0.156225	0.0376386	0.0778536	0.08589	9883924	0.00943496	0.0144994	244562	GCST90027543	2	10024053	0.0347432	6.91e-06	7738	0.00260682	7738	2.75531e-05	244562	TRUE	7.17641e-05	0.00350437	27.2051	42.2042	20.2191
rs12477233	A	G	A	G	0.172524	0.00577909	0.0953506	0.08078	120339448	0.645015	0.0125442	244562	GCST90027543	2	121097024	0.0362487	1.94e-06	7738	0.00291963	7738	8.67856e-07	244562	TRUE	4.17102e-06	0.00513491	39.9287	42.2042	22.6524
rs1348	C	T	C	T	-0.103083	0.00994754	0.198638	0.1759	10449025	0.314353	0.00988693	244562	GCST90027543	6	10449258	0.0222436	3.58e-06	7738	0.00276849	7738	4.13924e-06	244562	TRUE	1.1646e-05	0.00338295	26.2593	42.2042	21.4765
rs3010318	G	T	G	T	0.12472	-0.0136085	0.856341	0.8384	59091091	0.163407	0.00976427	244562	GCST90027543	1	59556763	0.0254893	9.93e-07	7738	0.0030853	7738	7.94241e-06	244562	TRUE	4.86287e-06	0.00382721	29.721	42.2042	23.9418
rs324546	G	A	G	A	-0.0869535	0.00431648	0.623757	0.6268	9107265	0.585425	0.00791321	244562	GCST90027543	9	9107265	0.0185896	2.9e-06	7738	0.00282027	7738	1.21666e-06	244562	TRUE	6.56588e-06	0.00354885	27.5517	42.2042	21.8793
rs34280534	C	G	C	G	0.10559	-1.27e-05	0.195189	0.2076	127597248	0.998887	0.00912448	244562	GCST90027543	2	128354823	0.0224937	2.68e-06	7738	0.00284035	7738	7.92146e-12	244562	TRUE	3.85686e-06	0.00350288	27.1935	42.2042	22.0355
rs34880012	C	T	C	T	-0.168228	-0.0257107	0.0974342	0.1012	80420822	0.0596815	0.0136531	244562	GCST90027543	8	81333057	0.0335577	5.36e-07	7738	0.00323808	7738	1.45002e-05	244562	TRUE	4.16579e-06	0.00497756	38.6991	42.2042	25.1311
rs73223276	A	C	A	C	0.16298	0.0192416	0.076636	0.08487	21212420	0.14619	0.0132416	244562	GCST90027543	8	21069931	0.0361788	6.64e-06	7738	0.00261641	7738	8.63405e-06	244562	TRUE	2.93315e-05	0.00375928	29.1915	42.2042	20.2937
rs7768092	C	T	C	T	0.168872	-0.000979918	0.0753044	0.09714	168304326	0.941763	0.0134136	244562	GCST90027543	6	168705006	0.0366397	4.05e-06	7738	0.00273845	7738	2.18225e-08	244562	TRUE	6.10765e-06	0.00397159	30.8467	42.2042	21.2428
rs10433369	A	T	A	T	-0.127888	-0.00243546	0.212694	0.2045	105461611	0.806018	0.00991773	244562	GCST90027544	3	105180455	0.0272418	2.67e-06	7738	0.00284077	7738	2.46577e-07	244562	TRUE	4.72734e-06	0.00547758	42.6079	42.2042	22.0388
rs11684212	T	C	T	C	-0.233394	-0.0294438	0.0510055	0.06544	151097966	0.0550884	0.0153499	244562	GCST90027544	2	151954480	0.0506614	4.09e-06	7738	0.00273602	7738	1.50448e-05	244562	TRUE	2.6983e-05	0.00527339	41.0112	42.2042	21.2239
rs16880922	T	C	T	C	0.169769	-0.0038882	0.0949568	0.09918	88587472	0.771157	0.0133679	244562	GCST90027544	6	89297191	0.0382782	9.2e-06	7738	0.00253626	7738	3.4593e-07	244562	TRUE	1.60647e-05	0.00495384	38.5137	42.2042	19.6704
rs4442602	C	T	C	T	-0.109588	-0.00134797	0.67759	0.6585	125226405	0.861951	0.0077518	244562	GCST90027544	12	125710951	0.0246138	8.5e-06	7738	0.00255588	7738	1.23643e-07	244562	TRUE	1.3557e-05	0.00524725	40.8068	42.2042	19.823
rs56349005	T	C	T	C	-0.125349	0.00719795	0.193825	0.1963	75418192	0.414409	0.00881929	244562	GCST90027544	6	76127908	0.0280718	8e-06	7738	0.00257079	7738	2.72373e-06	244562	TRUE	2.1259e-05	0.00491033	38.1738	42.2042	19.9389
rs72497321	G	A	G	A	-0.163914	-5.31e-05	0.104649	0.08998	119003913	0.996743	0.0129968	244562	GCST90027544	8	120016152	0.0365851	7.45e-06	7738	0.0025881	7738	6.8254e-11	244562	TRUE	1.0422e-05	0.0050349	39.1471	42.2042	20.0735
rs72802218	C	A	C	A	0.110332	-0.0193907	0.276743	0.2638	52467488	0.0275994	0.00880222	244562	GCST90027544	2	52694626	0.0243166	5.7e-06	7738	0.00265416	7738	1.98431e-05	244562	TRUE	4.5186e-05	0.00487307	37.8826	42.2042	20.5872
rs78721974	G	C	G	C	0.194905	0.0121337	0.0762398	0.06339	234681080	0.378639	0.0137819	244562	GCST90027544	2	235589724	0.0430417	5.95e-06	7738	0.00264363	7738	3.16942e-06	244562	TRUE	1.69327e-05	0.00535078	41.6163	42.2042	20.5053
rs8100936	C	T	C	T	-0.107435	0.00164891	0.556737	0.5429	690902	0.829451	0.0076549	244562	GCST90027544	19	690902	0.02236	1.55e-06	7738	0.00297535	7738	1.89727e-07	244562	TRUE	2.72957e-06	0.00569683	44.3232	42.2042	23.086
rs9649791	T	C	T	C	0.170452	0.00222467	0.0951246	0.08691	51550926	0.886645	0.0156062	244562	GCST90027544	7	51618623	0.0380155	7.33e-06	7738	0.00259202	7738	8.30909e-08	244562	TRUE	1.14752e-05	0.00500168	38.8875	42.2042	20.104
rs9965721	C	A	C	A	-0.11424	0.000985896	0.57824	0.5634	73837073	0.898457	0.0077258	244562	GCST90027544	18	71504308	0.0246148	3.47e-06	7738	0.00277664	7738	6.6587e-08	244562	TRUE	5.50255e-06	0.00636561	49.5598	42.2042	21.5399
rs9969725	G	A	G	A	-0.195776	0.0148215	0.0970736	0.1022	108004301	0.240058	0.0126157	244562	GCST90027544	9	110766582	0.0386241	4e-07	7738	0.00331014	7738	5.64379e-06	244562	TRUE	1.73856e-06	0.00671897	52.3295	42.2042	25.6923
rs2467707	C	T	C	T	0.119244	0.018653	0.890111	0.8814	25684350	0.152875	0.0130491	244562	GCST90027545	8	25541866	0.0256029	3.2e-06	7738	0.00279616	7738	8.35504e-06	244562	TRUE	1.4725e-05	0.00278164	21.5788	42.2042	21.6918
rs2746259	A	G	A	G	0.0816556	0.00838054	0.621172	0.6278	62824709	0.290067	0.00792131	244562	GCST90027545	20	61456061	0.0181758	7.04e-06	7738	0.00260218	7738	4.57681e-06	244562	TRUE	2.27853e-05	0.00313802	24.3522	42.2042	20.183
rs2769148	A	T	A	T	-0.137397	0.00376206	0.0847084	0.1104	109783779	0.744934	0.011564	244562	GCST90027545	9	112546059	0.0292051	2.54e-06	7738	0.00285286	7738	4.32766e-07	244562	TRUE	4.82152e-06	0.00292732	22.7122	42.2042	22.1328
rs34436485	G	T	G	T	-0.0863431	0.0167936	0.22915	0.2587	52625061	0.0745521	0.00941762	244562	GCST90027545	12	53018845	0.0194084	8.64e-06	7738	0.00255182	7738	1.30021e-05	244562	TRUE	4.79006e-05	0.00263375	20.4285	42.2042	19.7914
rs6504045	G	A	G	A	0.0838954	0.000195555	0.265363	0.2607	61477751	0.98244	0.00888484	244562	GCST90027545	17	59555112	0.0182589	4.33e-06	7738	0.00272162	7738	1.98086e-09	244562	TRUE	6.25494e-06	0.00274422	21.2877	42.2042	21.1119
rs6705904	G	T	G	T	0.0777489	0.00830469	0.607313	0.5521	65542897	0.284889	0.00776574	244562	GCST90027545	2	65770031	0.0164847	2.4e-06	7738	0.00286723	7738	4.67621e-06	244562	TRUE	8.43655e-06	0.00288322	22.3691	42.2042	22.2447
rs6771585	T	C	T	C	-0.0828843	0.005755	0.268426	0.3211	11724725	0.530552	0.00917623	244562	GCST90027545	3	11766199	0.0186237	8.57e-06	7738	0.00255379	7738	1.60833e-06	244562	TRUE	1.95687e-05	0.0026981	20.9289	42.2042	19.8067
rs73035953	A	G	A	G	-0.0938675	-0.00300861	0.182476	0.1738	9599574	0.755129	0.00964658	244562	GCST90027545	5	9599686	0.0211146	8.76e-06	7738	0.00254824	7738	3.9774e-07	244562	TRUE	1.55896e-05	0.00262886	20.3904	42.2042	19.7635
rs10097925	G	A	G	A	0.127694	0.0282405	0.0903157	0.08793	112215035	0.0703396	0.0156049	244562	GCST90027546	8	113227264	0.0280562	5.33e-06	7738	0.00267058	7738	1.33915e-05	244562	TRUE	3.15622e-05	0.00267932	20.7829	42.2042	20.7149
rs10259110	C	A	C	A	-0.184124	0.0024519	0.0537457	0.03579	141951731	0.919596	0.02429	244562	GCST90027546	7	141651531	0.0397468	3.61e-06	7738	0.00276629	7738	4.16643e-08	244562	TRUE	5.60456e-06	0.00344828	26.7682	42.2042	21.4593
rs11784752	G	C	G	C	-0.15161	0.0187973	0.0773139	0.091	48162880	0.225851	0.0155206	244562	GCST90027546	8	49075440	0.0309735	9.84e-07	7738	0.00308756	7738	5.99768e-06	244562	TRUE	4.13748e-06	0.00327942	25.4531	42.2042	23.9594
rs4268811	C	A	C	A	0.0874016	0.0136688	0.332946	0.3252	27617570	0.102662	0.00837506	244562	GCST90027546	17	25944596	0.0174958	5.87e-07	7738	0.00321556	7738	1.08917e-05	244562	TRUE	3.66245e-06	0.00339315	26.3388	42.2042	24.9558
rs4810354	A	G	A	G	-0.093531	0.0199727	0.727515	0.726	42357871	0.0242845	0.00886652	244562	GCST90027546	20	40986511	0.0188279	6.78e-07	7738	0.00317986	7738	2.07478e-05	244562	TRUE	7.00274e-06	0.00346837	26.9247	42.2042	24.6779
rs56328422	C	T	C	T	0.0920807	-0.0107385	0.27704	0.2822	159529709	0.204565	0.00846449	244562	GCST90027546	2	160386220	0.0185967	7.37e-07	7738	0.00315918	7738	6.58108e-06	244562	TRUE	3.32034e-06	0.00339644	26.3644	42.2042	24.5169
rs602124	C	G	C	G	-0.085996	-0.00345327	0.772156	0.7382	69574085	0.711048	0.00932185	244562	GCST90027546	11	69388853	0.0193755	9.06e-06	7738	0.00253998	7738	5.6114e-07	244562	TRUE	1.68636e-05	0.00260213	20.1826	42.2042	19.6993
rs61086481	A	G	A	G	0.0879345	0.0065853	0.210287	0.1861	62420728	0.518142	0.0101906	244562	GCST90027546	18	60087961	0.019844	9.37e-06	7738	0.00253188	7738	1.70751e-06	244562	TRUE	2.16114e-05	0.00256821	19.9188	42.2042	19.6363
rs6883971	A	G	A	G	-0.0747935	0.00406727	0.500646	0.4581	171909719	0.598489	0.00772401	244562	GCST90027546	5	171336723	0.0161242	3.51e-06	7738	0.00277363	7738	1.13379e-06	244562	TRUE	7.73769e-06	0.00279703	21.6985	42.2042	21.5165
rs72836424	C	T	C	T	0.134741	-0.0216789	0.0785636	0.09305	127239189	0.0756049	0.0122012	244562	GCST90027546	10	129037453	0.0298751	6.48e-06	7738	0.00262255	7738	1.29085e-05	244562	TRUE	3.67316e-05	0.00262855	20.3881	42.2042	20.3414
rs7514177	A	G	A	G	0.0845949	0.00138356	0.367239	0.3691	77317076	0.86779	0.00831135	244562	GCST90027546	1	77782761	0.0169102	5.66e-07	7738	0.00322457	7738	1.1331e-07	244562	TRUE	9.92119e-07	0.00332588	25.8149	42.2042	25.026
rs11164337	T	C	T	C	-0.103145	0.00338204	0.335786	0.2965	101924177	0.666299	0.00784272	244562	GCST90027547	1	102389733	0.0211939	1.13e-06	7738	0.00305232	7738	7.60393e-07	244562	TRUE	2.43752e-06	0.00474566	36.8875	42.2042	23.6851
rs11601607	T	G	T	G	-0.177624	-0.0247001	0.0739059	0.1043	57667434	0.0723452	0.0137456	244562	GCST90027547	11	57434906	0.0388716	4.89e-06	7738	0.00269185	7738	1.32031e-05	244562	TRUE	2.89001e-05	0.00431884	33.5555	42.2042	20.8804
rs1696430	A	G	A	G	-0.1744	0.0118089	0.0698958	0.07873	130014638	0.417787	0.0145741	244562	GCST90027547	12	130499183	0.0390885	8.13e-06	7738	0.00256662	7738	2.68454e-06	244562	TRUE	2.15011e-05	0.00395463	30.7145	42.2042	19.9065
rs17181375	A	G	A	G	0.170862	0.0190384	0.0764906	0.09202	5569702	0.116487	0.0121288	244562	GCST90027547	12	5678868	0.0382622	7.99e-06	7738	0.00257109	7738	1.00748e-05	244562	TRUE	3.79609e-05	0.00412449	32.0392	42.2042	19.9412
rs2695011	T	C	T	C	0.20264	-0.00345472	0.935027	0.93967	19783397	0.847943	0.0180174	244562	GCST90027547	12	19936331	0.044901	6.39e-06	7738	0.00262591	7738	1.50334e-07	244562	TRUE	1.04565e-05	0.00498927	38.7906	42.2042	20.3675
rs28645782	C	T	C	T	0.107058	0.00384121	0.741605	0.729	99451061	0.638139	0.00816753	244562	GCST90027547	15	99991266	0.0233139	4.39e-06	7738	0.00271838	7738	9.04417e-07	244562	TRUE	9.1479e-06	0.00439263	34.1313	42.2042	21.0867
rs4291387	A	G	A	G	0.0960681	0.0101992	0.326343	0.3466	96081356	0.213945	0.00820669	244562	GCST90027547	9	98843638	0.021356	6.85e-06	7738	0.00260896	7738	6.3155e-06	244562	TRUE	2.56394e-05	0.0040579	31.5198	42.2042	20.2357
rs4930770	T	C	T	C	0.105489	-0.00204578	0.245025	0.3129	5607720	0.799011	0.00803441	244562	GCST90027547	12	5716886	0.0233603	6.31e-06	7738	0.00262904	7738	2.65109e-07	244562	TRUE	1.08674e-05	0.00411706	31.9813	42.2042	20.3919
rs497333	G	T	G	T	-0.100133	-0.0072435	0.668849	0.6769	39741497	0.372378	0.00812026	244562	GCST90027547	1	40207169	0.0222943	7.07e-06	7738	0.00260087	7738	3.25364e-06	244562	TRUE	2.01128e-05	0.00444159	34.5134	42.2042	20.1728
rs78900653	G	A	G	A	-0.186456	0.0519711	0.0626405	0.06646	30281818	0.00610942	0.0189548	244562	GCST90027547	1	30754665	0.0408695	5.06e-06	7738	0.00268331	7738	3.07389e-05	244562	TRUE	6.0883e-05	0.00408267	31.713	42.2042	20.8139
rs9394084	A	G	A	G	-0.112177	0.00792276	0.249958	0.2566	11451191	0.375313	0.00893647	244562	GCST90027547	6	11451424	0.0248409	6.31e-06	7738	0.00262914	7738	3.21392e-06	244562	TRUE	1.79816e-05	0.00471835	36.6742	42.2042	20.3926
rs9999134	A	T	A	T	-0.0906156	-0.00926496	0.413889	0.363	162255004	0.238516	0.00786029	244562	GCST90027547	4	163176156	0.0204524	9.4e-06	7738	0.00253105	7738	5.68096e-06	244562	TRUE	3.27279e-05	0.00398382	30.9421	42.2042	19.6299
rs11631625	G	A	G	A	-0.0861176	-0.0221033	0.241789	0.2638	66316393	0.0101323	0.00859622	244562	GCST90027548	15	66608731	0.0190931	6.47e-06	7738	0.00262285	7738	2.70335e-05	244562	TRUE	6.65555e-05	0.0027192	21.0931	42.2042	20.3437
rs12442423	C	A	C	A	-0.0975472	-0.0071039	0.168002	0.1503	93396770	0.50471	0.010649	244562	GCST90027548	15	93939999	0.0220458	9.66e-06	7738	0.00252443	7738	1.81967e-06	244562	TRUE	2.2605e-05	0.00266009	20.6333	42.2042	19.5784
rs12541554	A	G	A	G	-0.0806005	-0.00410113	0.342803	0.3364	10535569	0.614193	0.00813559	244562	GCST90027548	8	10393079	0.0170578	2.3e-06	7738	0.0028778	7738	1.03907e-06	244562	TRUE	5.08276e-06	0.00292715	22.7109	42.2042	22.327
rs2305588	C	T	C	T	-0.0980614	-0.0138903	0.200682	0.2045	181482345	0.191962	0.0106456	244562	GCST90027548	2	182347072	0.0204326	1.59e-06	7738	0.00296853	7738	6.96141e-06	244562	TRUE	6.98948e-06	0.00308499	23.9394	42.2042	23.0329
rs34153461	C	A	C	A	0.0759731	-0.0153179	0.457711	0.4571	83505816	0.0491768	0.00778722	244562	GCST90027548	7	83135132	0.0171584	9.52e-06	7738	0.00252784	7738	1.58213e-05	244562	TRUE	6.00018e-05	0.00286531	22.2297	42.2042	19.605
rs36095827	T	G	T	G	0.0875099	-0.0106611	0.52524	0.501	4520246	0.175371	0.00786712	244562	GCST90027548	17	4423541	0.0163625	8.88e-08	7738	0.0036838	7738	7.50903e-06	244562	TRUE	5.04177e-07	0.00381923	29.6589	42.2042	28.6032
rs55974538	A	G	A	G	-0.11291	0.00736664	0.117807	0.09714	193925863	0.586946	0.0135599	244562	GCST90027548	1	193894993	0.025371	8.57e-06	7738	0.00255366	7738	1.20681e-06	244562	TRUE	1.8329e-05	0.0026499	20.5541	42.2042	19.8057
rs73009442	A	C	A	C	0.0928574	0.0102927	0.287204	0.2546	18364263	0.218177	0.0083586	244562	GCST90027548	19	18475073	0.0199593	3.28e-06	7738	0.00279005	7738	6.20016e-06	244562	TRUE	1.28629e-05	0.00353036	27.4076	42.2042	21.6442
rs77995790	C	T	C	T	-0.158003	0.00739608	0.0617925	0.06851	36501450	0.667191	0.0171999	244562	GCST90027548	18	34081413	0.0343555	4.24e-06	7738	0.00272669	7738	7.56074e-07	244562	TRUE	8.57246e-06	0.00289465	22.458	42.2042	21.1514
rs10450895	T	C	T	C	-0.0956152	0.00810457	0.417494	0.4346	81358896	0.297629	0.0077814	244562	GCST90027549	14	81825240	0.0207984	4.28e-06	7738	0.00272454	7738	4.43565e-06	244562	TRUE	1.41514e-05	0.00444667	34.5531	42.2042	21.1346
rs12646654	C	T	C	T	-0.0955337	0.00648922	0.315164	0.2975	15171343	0.414272	0.00794859	244562	GCST90027549	4	15172967	0.0216118	9.85e-06	7738	0.00251953	7738	2.72533e-06	244562	TRUE	2.58677e-05	0.00393973	30.5983	42.2042	19.5403
rs1641129	T	G	T	G	-0.204992	-0.0228789	0.0583257	0.06851	10487734	0.223287	0.0187865	244562	GCST90027549	2	10627860	0.045167	5.66e-06	7738	0.00265558	7738	6.06441e-06	244562	TRUE	2.11007e-05	0.00461599	35.8749	42.2042	20.5983
rs2962259	C	T	C	T	0.122254	0.0133939	0.799817	0.8681	51118513	0.217353	0.0108576	244562	GCST90027549	5	50414347	0.0254425	1.55e-06	7738	0.00297575	7738	6.22241e-06	244562	TRUE	6.41515e-06	0.00478601	37.2027	42.2042	23.0891
rs469926	C	T	C	T	-0.0936989	-0.0113386	0.582726	0.5798	162427473	0.160746	0.00808418	244562	GCST90027549	1	162397263	0.0208728	7.15e-06	7738	0.00259813	7738	8.04375e-06	244562	TRUE	3.0206e-05	0.00426958	33.1711	42.2042	20.1515
rs6794521	C	T	C	T	0.0956983	-0.000562875	0.545526	0.5225	165549335	0.941583	0.00768111	244562	GCST90027549	3	165267123	0.0203386	2.54e-06	7738	0.0028537	7738	2.19579e-08	244562	TRUE	3.889e-06	0.00454112	35.2904	42.2042	22.1394
rs80085001	C	T	C	T	0.211639	-0.0231656	0.0548896	0.05726	99631316	0.427215	0.0291771	244562	GCST90027549	4	100552473	0.0446399	2.13e-06	7738	0.00289713	7738	2.57761e-06	244562	TRUE	6.00521e-06	0.00464723	36.1188	42.2042	22.4773
rs9386212	T	G	T	G	0.0947158	0.000594768	0.590529	0.5552	148100924	0.938914	0.00776106	244562	GCST90027549	6	148422060	0.0208453	5.53e-06	7738	0.00266167	7738	2.40142e-08	244562	TRUE	8.27824e-06	0.0043385	33.7089	42.2042	20.6457
rs11027972	G	A	G	A	-0.202865	-0.00833633	0.0624236	0.07464	24519794	0.669575	0.0195353	244562	GCST90027550	11	24541340	0.0426597	1.98e-06	7738	0.0029147	7738	7.44601e-07	244562	TRUE	4.13139e-06	0.00481726	37.4467	42.2042	22.6141
rs12414617	G	T	G	T	-0.199019	-0.0114548	0.0745865	0.07055	116296773	0.416233	0.01409	244562	GCST90027550	10	118056285	0.0391838	3.79e-07	7738	0.00332364	7738	2.70251e-06	244562	TRUE	1.20264e-06	0.00546783	42.5317	42.2042	25.7974
rs1323288	G	T	G	T	-0.104898	-0.00212978	0.264833	0.2863	58780443	0.798939	0.00836124	244562	GCST90027550	1	59246115	0.0232863	6.65e-06	7738	0.00261625	7738	2.65303e-07	244562	TRUE	1.14244e-05	0.00428472	33.2892	42.2042	20.2924
rs13407420	A	C	A	C	0.0901004	0.0112684	0.463935	0.5061	51789272	0.142775	0.00768893	244562	GCST90027550	2	52016410	0.0200652	7.11e-06	7738	0.00259968	7738	8.7822e-06	244562	TRUE	3.15198e-05	0.00403792	31.364	42.2042	20.1635
rs1541082	G	T	G	T	0.185119	-0.0494397	0.92615	0.8875	69007184	0.0102085	0.0192471	244562	GCST90027550	9	71622100	0.0381404	1.21e-06	7738	0.00303595	7738	2.69789e-05	244562	TRUE	1.51743e-05	0.00468774	36.4352	42.2042	23.5576
rs16934689	G	A	G	A	-0.145495	-0.0195425	0.125403	0.09509	40299241	0.067655	0.0106948	244562	GCST90027550	11	40320791	0.0305982	1.98e-06	7738	0.00291421	7738	1.3653e-05	244562	TRUE	1.30641e-05	0.00464346	36.0894	42.2042	22.6102
rs17029909	G	A	G	A	-0.109856	0.00159742	0.234966	0.2321	6822129	0.849752	0.00843255	244562	GCST90027550	1	6882189	0.023518	3e-06	7738	0.00281259	7738	1.46735e-07	244562	TRUE	5.03421e-06	0.00433874	33.7107	42.2042	21.8196
rs3094190	A	G	A	G	-0.0960696	-0.00501845	0.610952	0.6033	31172296	0.533143	0.00805251	244562	GCST90027550	6	31140073	0.0203817	2.43e-06	7738	0.00286371	7738	1.58815e-06	244562	TRUE	5.92455e-06	0.00438745	34.0909	42.2042	22.2173
rs32064	T	C	T	C	0.0953215	-0.0149826	0.465387	0.4417	11249094	0.0512425	0.00768558	244562	GCST90027550	5	11249206	0.0201502	2.24e-06	7738	0.00288438	7738	1.55392e-05	244562	TRUE	1.60628e-05	0.00452132	35.1358	42.2042	22.3781
rs472752	C	A	C	A	0.0930875	-0.00221443	0.598315	0.6196	128791612	0.781545	0.00798551	244562	GCST90027550	10	130589876	0.0206684	6.67e-06	7738	0.00261526	7738	3.14437e-07	244562	TRUE	1.16787e-05	0.00416513	32.3562	42.2042	20.2847
rs58095618	A	G	A	G	-0.152287	0.000828514	0.100818	0.1288	60599602	0.942745	0.0115359	244562	GCST90027550	20	59174660	0.0328042	3.45e-06	7738	0.00277806	7738	2.10915e-08	244562	TRUE	5.22377e-06	0.00420476	32.6654	42.2042	21.551
rs61311341	G	T	G	T	-0.155422	-0.0165635	0.100968	0.1043	44730483	0.165029	0.0119303	244562	GCST90027550	10	45225931	0.0339779	4.78e-06	7738	0.00269738	7738	7.88156e-06	244562	TRUE	2.06144e-05	0.00438545	34.0753	42.2042	20.9234
rs62062058	C	T	C	T	-0.116391	0.0236189	0.224247	0.228	11294191	0.00560828	0.00852715	244562	GCST90027550	17	11197508	0.0247978	2.68e-06	7738	0.00283963	7738	3.13698e-05	244562	TRUE	3.57098e-05	0.00471323	36.6342	42.2042	22.0299
rs72956316	C	T	C	T	-0.151959	-0.00450329	0.110632	0.1012	101708766	0.71984	0.0125554	244562	GCST90027550	6	102156641	0.0322146	2.39e-06	7738	0.00286803	7738	5.2603e-07	244562	TRUE	4.67458e-06	0.00454407	35.3134	42.2042	22.2509
rs76063194	T	G	T	G	0.16236	-0.0325048	0.0928905	0.08589	134006706	0.0276217	0.0147573	244562	GCST90027550	4	134927861	0.0337697	1.53e-06	7738	0.00297914	7738	1.98374e-05	244562	TRUE	1.39112e-05	0.00444241	34.5199	42.2042	23.1155
rs77963678	C	T	C	T	0.15031	-0.0240658	0.0974272	0.08793	18193632	0.0950692	0.0144172	244562	GCST90027550	10	18482561	0.0335615	7.51e-06	7738	0.00258614	7738	1.13933e-05	244562	TRUE	3.87197e-05	0.00397345	30.8613	42.2042	20.0582
rs78559400	T	C	T	C	0.229021	0.0195371	0.0569253	0.03988	226621582	0.237771	0.0165488	244562	GCST90027550	2	227486298	0.0481591	1.98e-06	7738	0.00291481	7738	5.69902e-06	244562	TRUE	7.72209e-06	0.0056316	43.8128	42.2042	22.6149
rs10001022	T	C	T	C	0.397916	0.0192333	0.0692782	0.07873	45391347	0.21079	0.0153695	244562	GCST90027551	4	45393364	0.0732267	5.51e-08	7738	0.00380253	7738	6.40326e-06	244562	TRUE	2.94047e-07	0.0204188	161.252	42.2042	29.5287
rs11217548	T	C	T	C	-0.34505	0.0076952	0.0682151	0.06442	119872094	0.676011	0.0184134	244562	GCST90027551	11	119742803	0.0754496	4.8e-06	7738	0.00269626	7738	7.14143e-07	244562	TRUE	9.55045e-06	0.0151353	118.886	42.2042	20.9146
rs114111279	A	C	A	C	0.346972	-0.0327605	0.0785548	0.05726	26812327	0.0373259	0.0157337	244562	GCST90027551	3	26853818	0.0736956	2.5e-06	7738	0.00285724	7738	1.77274e-05	244562	TRUE	1.96922e-05	0.0174285	137.219	42.2042	22.1669
rs12930516	C	T	C	T	0.178996	-0.00159187	0.561242	0.5532	86708975	0.836857	0.0077307	244562	GCST90027551	16	86742581	0.0384823	3.3e-06	7738	0.00278891	7738	1.73377e-07	244562	TRUE	5.59761e-06	0.0157794	124.027	42.2042	21.6354
rs273145	C	T	C	T	0.183214	-0.0179149	0.686695	0.6851	41469331	0.0260136	0.00804799	244562	GCST90027551	7	41508929	0.0405569	6.26e-06	7738	0.00263104	7738	2.02609e-05	244562	TRUE	4.99923e-05	0.0144437	113.374	42.2042	20.4074
rs28510778	T	C	T	C	-0.412225	0.00533946	0.0522974	0.06442	24498262	0.699549	0.0138353	244562	GCST90027551	16	24509583	0.0891587	3.77e-06	7738	0.00275566	7738	6.09018e-07	244562	TRUE	7.39094e-06	0.0168442	132.539	42.2042	21.3767
rs35832957	T	C	T	C	0.25379	-0.00911016	0.161574	0.1605	186990096	0.38601	0.0105092	244562	GCST90027551	3	186707884	0.0540401	2.65e-06	7738	0.00284291	7738	3.07275e-06	244562	TRUE	7.84041e-06	0.0174508	137.397	42.2042	22.0555
rs6063434	G	A	G	A	-0.208672	-0.00203706	0.771033	0.7505	49797002	0.811944	0.00856199	244562	GCST90027551	20	48413539	0.0457102	4.99e-06	7738	0.00268669	7738	2.31458e-07	244562	TRUE	8.56233e-06	0.0153746	120.795	42.2042	20.8402
rs844134	T	C	T	C	-0.199912	0.000913657	0.290074	0.2781	157760016	0.914333	0.00849323	244562	GCST90027551	6	158181048	0.0436592	4.67e-06	7738	0.00270293	7738	4.7319e-08	244562	TRUE	7.22259e-06	0.01646	129.465	42.2042	20.9665
rs13007173	G	A	G	A	0.129791	-0.0100242	0.101073	0.09407	113244344	0.585328	0.0183722	244562	GCST90027552	2	114001921	0.0285764	5.58e-06	7738	0.00265951	7738	1.21729e-06	244562	TRUE	1.22036e-05	0.00306111	23.7534	42.2042	20.6288
rs2666365	T	C	T	C	-0.0953908	0.00514329	0.176541	0.1524	191109939	0.662427	0.0117813	244562	GCST90027552	3	190827728	0.020759	4.32e-06	7738	0.00272207	7738	7.79313e-07	244562	TRUE	8.77381e-06	0.00264564	20.521	42.2042	21.1154
rs4837963	T	C	T	C	0.121846	-0.0202393	0.116006	0.1227	122403515	0.130146	0.0133723	244562	GCST90027552	9	125165794	0.0252455	1.39e-06	7738	0.00300215	7738	9.36678e-06	244562	TRUE	7.31942e-06	0.00304497	23.6278	42.2042	23.2946
rs56385884	G	A	G	A	-0.127456	0.00645897	0.0888632	0.1002	143952728	0.713903	0.0176176	244562	GCST90027552	2	144710295	0.0282124	6.25e-06	7738	0.00263136	7738	5.49598e-07	244562	TRUE	1.17864e-05	0.00263061	20.4041	42.2042	20.4099
rs7086625	T	G	T	G	0.104962	-0.0128532	0.15398	0.135	70758685	0.252805	0.0112396	244562	GCST90027552	10	72518441	0.0221493	2.15e-06	7738	0.00289447	7738	5.34727e-06	244562	TRUE	8.08793e-06	0.00287038	22.2692	42.2042	22.4566
rs72929354	C	G	C	G	-0.162909	0.000378155	0.0635831	0.08487	34567165	0.980496	0.0154683	244562	GCST90027552	11	34588712	0.0352049	3.7e-06	7738	0.00276037	7738	2.44382e-09	244562	TRUE	5.38271e-06	0.00316032	24.5257	42.2042	21.4133
rs73100534	C	G	C	G	-0.132943	-0.0105108	0.0944874	0.06953	66391505	0.439471	0.0135959	244562	GCST90027552	3	66441929	0.0279034	1.89e-06	7738	0.00292569	7738	2.44382e-06	244562	TRUE	5.29266e-06	0.00302433	23.4672	42.2042	22.6995
rs73170444	A	C	A	C	0.212819	0.00533675	0.0520125	0.04908	47101395	0.832623	0.0252521	244562	GCST90027552	22	47497291	0.041602	3.13e-07	7738	0.00337139	7738	1.8263e-07	244562	TRUE	5.84101e-07	0.00446644	34.7074	42.2042	26.1693
rs7349532	G	C	G	C	0.100032	-0.00124989	0.197711	0.2127	385952	0.899914	0.0099379	244562	GCST90027552	3	427635	0.0213377	2.76e-06	7738	0.00283292	7738	6.46798e-08	244562	TRUE	4.40887e-06	0.00317446	24.6358	42.2042	21.9777
rs10409224	G	A	G	A	-0.0785661	0.0060918	0.354823	0.3364	34044602	0.449942	0.00806314	244562	GCST90027553	19	34535507	0.0169563	3.6e-06	7738	0.0027675	7738	2.33397e-06	244562	TRUE	9.54746e-06	0.00282612	21.9248	42.2042	21.4688
rs11040918	C	T	C	T	0.0782005	-0.00106473	0.645727	0.6421	6552554	0.891398	0.00779819	244562	GCST90027553	11	6573784	0.0174	6.98e-06	7738	0.00260418	7738	7.62264e-08	244562	TRUE	1.08884e-05	0.00279792	21.7055	42.2042	20.1986
rs11086863	A	G	A	G	-0.0782674	0.0125407	0.360961	0.3804	43154998	0.12399	0.00815263	244562	GCST90027553	20	41783638	0.017591	8.62e-06	7738	0.00255243	7738	9.67517e-06	244562	TRUE	3.97268e-05	0.00282605	21.9243	42.2042	19.7962
rs111866871	G	A	G	A	-0.117675	-0.0250102	0.110014	0.1196	206746020	0.023418	0.0110345	244562	GCST90027553	2	207610744	0.0253206	3.36e-06	7738	0.00278415	7738	2.10056e-05	244562	TRUE	2.9626e-05	0.00271162	21.0342	42.2042	21.5983
rs11764255	A	C	A	C	0.103612	0.0128582	0.168117	0.1933	43448866	0.280591	0.0119169	244562	GCST90027553	7	43488465	0.0217181	1.84e-06	7738	0.00293349	7738	4.76047e-06	244562	TRUE	6.6206e-06	0.00300278	23.2995	42.2042	22.7602
rs1565690	A	G	A	G	0.175471	0.00736279	0.0589198	0.07362	69993196	0.639557	0.0157218	244562	GCST90027553	9	72608112	0.0349066	4.99e-07	7738	0.00325584	7738	8.96802e-07	244562	TRUE	1.14919e-06	0.00341451	26.5052	42.2042	25.2694
rs2227019	C	G	C	G	0.0991645	0.00186515	0.176764	0.1718	28757589	0.845174	0.00955117	244562	GCST90027553	8	28615106	0.0221387	7.49e-06	7738	0.00258682	7738	1.5593e-07	244562	TRUE	1.22182e-05	0.00286194	22.2035	42.2042	20.0636
rs304820	T	G	T	G	-0.0780772	-0.0119899	0.307552	0.2975	30703013	0.172484	0.00878854	244562	GCST90027553	3	30744505	0.0173192	6.54e-06	7738	0.00262021	7738	7.61043e-06	244562	TRUE	2.7002e-05	0.00259648	20.1386	42.2042	20.3232
rs3860223	T	C	T	C	0.0907144	-0.00472045	0.808219	0.7904	110582859	0.617493	0.00945212	244562	GCST90027553	1	111125481	0.0202542	7.51e-06	7738	0.00258631	7738	1.01982e-06	244562	TRUE	1.5605e-05	0.00255104	19.7853	42.2042	20.0596
rs62087427	G	A	G	A	0.11829	-0.00879086	0.100849	0.07771	9559222	0.580719	0.0159158	244562	GCST90027553	18	9559220	0.0265803	8.58e-06	7738	0.00255358	7738	1.24744e-06	244562	TRUE	1.84659e-05	0.00253764	19.6811	42.2042	19.8051
rs72768324	C	T	C	T	0.104081	-0.0155401	0.146899	0.1339	135616181	0.188587	0.0118196	244562	GCST90027553	9	138508027	0.0231023	6.63e-06	7738	0.00261685	7738	7.06824e-06	244562	TRUE	2.63182e-05	0.00271514	21.0615	42.2042	20.297
rs74537816	C	T	C	T	-0.11528	-0.0175085	0.1229	0.138	58156423	0.10227	0.0107155	244562	GCST90027553	4	59022589	0.024976	3.92e-06	7738	0.00274632	7738	1.09166e-05	244562	TRUE	2.08254e-05	0.00286509	22.2281	42.2042	21.304
rs76005509	A	C	A	C	-0.120097	-0.0247123	0.118369	0.09305	131255414	0.0593909	0.013108	244562	GCST90027553	3	130974258	0.025172	1.83e-06	7738	0.00293384	7738	1.45333e-05	244562	TRUE	1.27333e-05	0.00301036	23.3585	42.2042	22.763
rs9853551	C	T	C	T	0.0742126	-0.00769587	0.625431	0.5849	150171797	0.354793	0.00831687	244562	GCST90027553	3	149889584	0.0163382	5.57e-06	7738	0.00265995	7738	3.50113e-06	244562	TRUE	1.64881e-05	0.00258046	20.0141	42.2042	20.6323
rs10933259	G	A	G	A	0.0833518	0.0131961	0.287092	0.3016	228489133	0.105255	0.00814627	244562	GCST90027554	2	229353849	0.0180549	3.9e-06	7738	0.00274744	7738	1.07296e-05	244562	TRUE	2.05122e-05	0.0028439	22.0632	42.2042	21.3128
rs11077815	C	T	C	T	-0.0791191	-0.0027501	0.616275	0.6155	76393809	0.739261	0.00826272	244562	GCST90027554	17	74389890	0.0169237	2.94e-06	7738	0.00281728	7738	4.52965e-07	244562	TRUE	5.57007e-06	0.00296065	22.9716	42.2042	21.8561
rs150794	G	C	G	C	-0.0954321	-0.0104756	0.791034	0.8088	42041700	0.2381	0.00887951	244562	GCST90027554	21	43461809	0.0213054	7.49e-06	7738	0.00258683	7738	5.69104e-06	244562	TRUE	2.654e-05	0.00301085	23.3623	42.2042	20.0636
rs34218333	A	T	A	T	0.0915685	0.00886937	0.206715	0.1667	123670731	0.414496	0.0108692	244562	GCST90027554	8	124682971	0.0203971	7.15e-06	7738	0.00259842	7738	2.72271e-06	244562	TRUE	1.91262e-05	0.00274994	21.3322	42.2042	20.1537
rs409534	T	C	T	C	-0.0932478	-0.031709	0.209549	0.229	8069205	0.000343115	0.00885636	244562	GCST90027554	10	8111168	0.0202551	4.15e-06	7738	0.00273215	7738	5.24139e-05	244562	TRUE	9.48946e-05	0.0028805	22.3479	42.2042	21.1938
rs4533289	A	G	A	G	-0.11869	-0.014465	0.129961	0.1247	25922143	0.380817	0.0165052	244562	GCST90027554	16	25933464	0.0244319	1.19e-06	7738	0.00304141	7738	3.14058e-06	244562	TRUE	3.71442e-06	0.00318574	24.7236	42.2042	23.6001
rs55906502	G	A	G	A	0.130872	0.00849053	0.0889034	0.07566	140383355	0.543349	0.0139703	244562	GCST90027554	4	141304509	0.0293518	8.25e-06	7738	0.00256326	7738	1.51033e-06	244562	TRUE	1.85822e-05	0.00277464	21.5243	42.2042	19.8803
rs7043302	T	G	T	G	0.187733	-0.0112471	0.0508132	0.05419	9139951	0.392139	0.0131431	244562	GCST90027554	9	9139951	0.0389839	1.47e-06	7738	0.00298878	7738	2.99434e-06	244562	TRUE	4.45908e-06	0.00339969	26.3897	42.2042	23.1905
rs10100272	G	A	G	A	0.104402	-0.0166881	0.832233	0.8753	19634434	0.123512	0.010835	244562	GCST90027555	8	19491945	0.0226546	4.06e-06	7738	0.00273777	7738	9.69982e-06	244562	TRUE	1.9974e-05	0.00304368	23.6178	42.2042	21.2376
rs111943101	A	G	A	G	-0.10313	0.0103097	0.185595	0.1779	18816206	0.263216	0.00921478	244562	GCST90027555	5	18816315	0.0231675	8.53e-06	7738	0.00255496	7738	5.1184e-06	244562	TRUE	2.85578e-05	0.00321519	24.9529	42.2042	19.8158
rs1750832	T	C	T	C	-0.0728943	-0.00153077	0.499391	0.5143	7526844	0.842617	0.00770986	244562	GCST90027555	1	7586904	0.0163097	7.84e-06	7738	0.00257548	7738	1.61191e-07	244562	TRUE	1.28058e-05	0.00265679	20.6076	42.2042	19.9754
rs7108080	A	G	A	G	-0.0769942	0.00280906	0.508635	0.4305	59959292	0.727659	0.00806642	244562	GCST90027555	11	59726765	0.0167709	4.41e-06	7738	0.0027171	7738	4.95878e-07	244562	TRUE	8.32314e-06	0.00296317	22.9912	42.2042	21.0767
rs72918404	C	T	C	T	-0.105726	-0.0170109	0.147413	0.1534	95834227	0.110788	0.0106674	244562	GCST90027555	6	96282103	0.0230278	4.41e-06	7738	0.00271744	7738	1.03979e-05	244562	TRUE	2.24773e-05	0.00280975	21.7975	42.2042	21.0794
rs801356	C	G	C	G	0.154211	0.0155893	0.941383	0.91922	194675778	0.423123	0.0194619	244562	GCST90027555	2	195540502	0.0348444	9.61e-06	7738	0.00252552	7738	2.62358e-06	244562	TRUE	2.49822e-05	0.00262452	20.3567	42.2042	19.5869
rs11139651	C	T	C	T	0.110149	-0.0256209	0.13051	0.1595	69658982	0.0107493	0.0100445	244562	GCST90027556	9	72273898	0.0241356	5.02e-06	7738	0.0026851	7738	2.66034e-05	244562	TRUE	5.2474e-05	0.00275359	21.3606	42.2042	20.8279
rs11668451	G	A	G	A	-0.127508	0.0156275	0.0913128	0.1053	56310304	0.29143	0.0148129	244562	GCST90027556	19	56821673	0.0282562	6.41e-06	7738	0.00262536	7738	4.55102e-06	244562	TRUE	2.08214e-05	0.00269806	20.9286	42.2042	20.3633
rs116873962	T	G	T	G	0.110536	-0.0293187	0.13023	0.1554	148867292	0.0224347	0.0128426	244562	GCST90027556	7	148564384	0.0247545	8e-06	7738	0.00257078	7738	2.13103e-05	244562	TRUE	6.48565e-05	0.00276792	21.472	42.2042	19.9388
rs1561691	A	G	A	G	0.10183	-0.0102933	0.851021	0.862	71050653	0.368327	0.0114419	244562	GCST90027556	15	71342992	0.022946	9.09e-06	7738	0.00253932	7738	3.3092e-06	244562	TRUE	2.55823e-05	0.00262934	20.3942	42.2042	19.6942
rs560351	T	A	T	A	0.0969695	-0.00701132	0.823673	0.816	97446924	0.512005	0.0106926	244562	GCST90027556	8	98459152	0.0218065	8.72e-06	7738	0.00254961	7738	1.75812e-06	244562	TRUE	2.03369e-05	0.00273133	21.1874	42.2042	19.7742
rs573126	C	A	C	A	-0.0818401	0.016697	0.285267	0.3395	116405369	0.0653717	0.00906112	244562	GCST90027556	11	116276086	0.0182486	7.3e-06	7738	0.00259316	7738	1.38842e-05	244562	TRUE	4.30251e-05	0.00273123	21.1866	42.2042	20.1128
rs57434716	A	G	A	G	0.0773641	0.0152072	0.325696	0.3098	36079037	0.128853	0.0100137	244562	GCST90027556	4	36080659	0.0173592	8.32e-06	7738	0.00256088	7738	9.43019e-06	244562	TRUE	3.79288e-05	0.00262892	20.3909	42.2042	19.8618
rs7551751	A	G	A	G	0.0744567	0.00246467	0.598166	0.5818	26199364	0.756126	0.00793591	244562	GCST90027556	1	26525855	0.0164681	6.15e-06	7738	0.00263547	7738	3.94402e-07	244562	TRUE	1.10877e-05	0.00266505	20.6719	42.2042	20.4419
rs98545	T	C	T	C	0.111512	0.000203846	0.128081	0.1759	2628129	0.98569	0.0113653	244562	GCST90027556	12	2737295	0.0251428	9.2e-06	7738	0.00253628	7738	1.31541e-09	244562	TRUE	1.29257e-05	0.00277737	21.5456	42.2042	19.6705
rs10937272	G	C	G	C	0.166947	0.0110651	0.338586	0.4029	186831366	0.151361	0.00771227	244562	GCST90027557	3	186549155	0.0328605	3.76e-07	7738	0.00332541	7738	8.41701e-06	244562	TRUE	2.05771e-06	0.0124833	97.7916	42.2042	25.8112
rs12449342	A	G	A	G	0.160955	-0.0122343	0.722053	0.7065	42935383	0.145758	0.00841031	244562	GCST90027557	17	41087400	0.0354844	5.73e-06	7738	0.00265255	7738	8.65258e-06	244562	TRUE	2.56629e-05	0.0103985	81.2879	42.2042	20.5747
rs13140123	A	T	A	T	-0.255831	-0.00882861	0.0865392	0.04806	40385814	0.558738	0.0150989	244562	GCST90027557	4	40387831	0.0573178	8.07e-06	7738	0.00256858	7738	1.39799e-06	244562	TRUE	1.78773e-05	0.0103476	80.8859	42.2042	19.9217
rs16851172	G	A	G	A	-0.190818	0.00349176	0.193511	0.181	105456605	0.737741	0.0104279	244562	GCST90027557	3	105175449	0.0396411	1.48e-06	7738	0.00298629	7738	4.58464e-07	244562	TRUE	2.89719e-06	0.0113651	88.931	42.2042	23.1711
rs16993923	G	A	G	A	-0.205762	0.0126239	0.172361	0.183	22856929	0.304263	0.012288	244562	GCST90027557	22	23199104	0.0459587	7.57e-06	7738	0.00258437	7738	4.31555e-06	244562	TRUE	2.38016e-05	0.0120793	94.5877	42.2042	20.0445
rs28465688	A	C	A	C	0.140849	-0.00113956	0.531041	0.5225	26339419	0.882303	0.00769711	244562	GCST90027557	4	26341041	0.0307359	4.59e-06	7738	0.00270721	7738	8.96259e-08	244562	TRUE	7.34255e-06	0.00988099	77.2022	42.2042	20.9998
rs3820904	G	A	G	A	-0.160534	-0.0143789	0.768846	0.7342	208464453	0.113046	0.00907387	244562	GCST90027557	2	209329178	0.03591	7.81e-06	7738	0.00257671	7738	1.02678e-05	244562	TRUE	3.76007e-05	0.0091602	71.5184	42.2042	19.985
rs4669688	C	T	C	T	0.146631	0.0020466	0.622084	0.6166	11093197	0.801847	0.00815517	244562	GCST90027557	2	11233323	0.0321029	4.93e-06	7738	0.00268953	7738	2.57522e-07	244562	TRUE	8.55836e-06	0.0101094	79.0051	42.2042	20.8623
rs4683801	G	A	G	A	0.17208	-0.000211388	0.273418	0.2996	140116695	0.97849	0.0078402	244562	GCST90027557	3	139835537	0.0380662	6.17e-06	7738	0.00263463	7738	2.97249e-09	244562	TRUE	8.84069e-06	0.0117653	92.0998	42.2042	20.4353
rs7822956	G	A	G	A	0.211638	0.016742	0.814694	0.8313	17862421	0.0954377	0.0100409	244562	GCST90027557	8	17719930	0.0404533	1.68e-07	7738	0.00352557	7738	1.13679e-05	244562	TRUE	1.20069e-06	0.0135239	106.055	42.2042	27.3703
rs10192555	C	T	C	T	0.105255	-0.000151679	0.568064	0.5603	209369098	0.984304	0.0077099	244562	GCST90027558	2	210233822	0.0232064	5.74e-06	7738	0.00265216	7738	1.58259e-09	244562	TRUE	8.20273e-06	0.00543666	42.2879	42.2042	20.5717
rs10793056	C	T	C	T	-0.104156	-0.0060965	0.506205	0.4744	73049120	0.440627	0.00790588	244562	GCST90027558	11	72760165	0.0229619	5.73e-06	7738	0.00265267	7738	2.4315e-06	244562	TRUE	1.50011e-05	0.0054234	42.1842	42.2042	20.5756
rs11761901	A	G	A	G	-0.137544	-0.000819925	0.213855	0.2485	116251632	0.924649	0.00866918	244562	GCST90027558	7	115891686	0.0278344	7.75e-07	7738	0.00314655	7738	3.65769e-08	244562	TRUE	1.2614e-06	0.00636115	49.5249	42.2042	24.4185
rs2834173	C	T	C	T	-0.107002	0.00525313	0.424138	0.4417	33283765	0.493424	0.00767022	244562	GCST90027558	21	34656070	0.0233815	4.73e-06	7738	0.0026999	7738	1.91794e-06	244562	TRUE	1.16833e-05	0.00559293	43.5103	42.2042	20.943
rs28634397	T	C	T	C	0.196644	0.0113795	0.079774	0.05317	5319260	0.438844	0.0146994	244562	GCST90027558	8	5176782	0.042355	3.44e-06	7738	0.00277861	7738	2.45053e-06	244562	TRUE	9.29016e-06	0.00567737	44.1709	42.2042	21.5552
rs34011530	G	C	G	C	-0.134451	0.00605809	0.18175	0.1595	1668231	0.590254	0.0112506	244562	GCST90027558	11	1689461	0.0300979	7.93e-06	7738	0.00257289	7738	1.18559e-06	244562	TRUE	1.69527e-05	0.00537673	41.8193	42.2042	19.9552
rs4585628	G	A	G	A	0.170362	-0.000889007	0.104614	0.08078	71532882	0.948045	0.013643	244562	GCST90027558	7	70997867	0.038025	7.46e-06	7738	0.00258801	7738	1.73622e-08	244562	TRUE	1.09531e-05	0.0054372	42.2922	42.2042	20.0728
rs61861701	G	A	G	A	0.138831	0.010727	0.247235	0.1851	110605246	0.28151	0.00996069	244562	GCST90027558	10	112365004	0.0274846	4.39e-07	7738	0.00328736	7738	4.74231e-06	244562	TRUE	1.73926e-06	0.00717418	55.9005	42.2042	25.5149
rs62079926	T	G	T	G	0.137284	-0.00422929	0.207428	0.2597	1492958	0.624274	0.00863469	244562	GCST90027558	18	1492959	0.0283038	1.23e-06	7738	0.0030319	7738	9.80969e-07	244562	TRUE	2.77302e-06	0.00619692	48.2383	42.2042	23.5261
rs62465767	A	G	A	G	0.177111	0.00215773	0.0949348	0.08998	51600295	0.891872	0.0158731	244562	GCST90027558	7	51667991	0.040061	9.82e-06	7738	0.0025202	7738	7.55584e-08	244562	TRUE	1.51277e-05	0.00539047	41.9267	42.2042	19.5455
rs63721662	T	C	T	C	-0.110728	0.0313084	0.327555	0.3354	143318658	0.000162577	0.00830235	244562	GCST90027558	4	144239811	0.0245862	6.68e-06	7738	0.00261504	7738	5.81445e-05	244562	TRUE	0.000162216	0.00540115	42.0102	42.2042	20.283
rs7691920	G	A	G	A	0.116198	0.00300516	0.702496	0.6881	56552234	0.724393	0.00852301	244562	GCST90027558	4	57418400	0.0257387	6.35e-06	7738	0.00262763	7738	5.08351e-07	244562	TRUE	1.1824e-05	0.0056437	43.9075	42.2042	20.3809
rs80031880	C	T	C	T	0.251853	-0.00405236	0.0649738	0.05317	84193447	0.742918	0.0123551	244562	GCST90027558	4	85114600	0.0555391	5.77e-06	7738	0.00265111	7738	4.39886e-07	244562	TRUE	1.05809e-05	0.00770702	60.0846	42.2042	20.5635
rs9886448	C	T	C	T	-0.15792	-0.0198455	0.123965	0.1176	26512191	0.0531888	0.0102646	244562	GCST90027558	8	26369707	0.0347403	5.47e-06	7738	0.00266399	7738	1.52843e-05	244562	TRUE	3.55422e-05	0.00541658	42.1308	42.2042	20.6637
rs996888	G	A	G	A	-0.182271	0.0116501	0.902701	0.93456	119557447	0.347526	0.0124017	244562	GCST90027558	11	119428158	0.0389881	2.94e-06	7738	0.00281728	7738	3.60839e-06	244562	TRUE	9.17003e-06	0.00583603	45.4126	42.2042	21.856
rs1551680	T	C	T	C	0.304768	-0.0371136	0.0532869	0.05624	126169971	0.0716935	0.0206065	244562	GCST90027559	10	127858540	0.0689124	9.75e-06	7738	0.00252192	7738	1.32637e-05	244562	TRUE	5.41971e-05	0.00937147	73.1835	42.2042	19.5589
rs2010010	C	T	C	T	0.172641	-0.011575	0.231858	0.3047	154380710	0.170348	0.00844221	244562	GCST90027559	5	153760270	0.0354685	1.13e-06	7738	0.00305322	7738	7.68672e-06	244562	TRUE	5.37923e-06	0.0106165	83.0105	42.2042	23.692
rs71323853	A	G	A	G	-0.243918	0.00874295	0.0852969	0.07873	22725814	0.576342	0.0156477	244562	GCST90027559	21	24098134	0.0538717	5.96e-06	7738	0.00264302	7738	1.27652e-06	244562	TRUE	1.31423e-05	0.00928391	72.4934	42.2042	20.5006
rs8045590	A	C	A	C	0.212173	0.00209514	0.888889	0.8855	6064070	0.860481	0.0119203	244562	GCST90027559	16	6114071	0.0459052	3.8e-06	7738	0.00275386	7738	1.26318e-07	244562	TRUE	6.25984e-06	0.00889231	69.4081	42.2042	21.3627
rs10239134	A	G	A	G	0.248673	0.00251616	0.103567	0.1452	51643665	0.840604	0.0125107	244562	GCST90027560	7	51711361	0.055122	6.44e-06	7738	0.00262392	7738	1.65398e-07	244562	TRUE	1.06185e-05	0.0114822	89.8584	42.2042	20.352
rs11753487	C	T	C	T	-0.253668	-0.00591163	0.133847	0.1585	26341086	0.600094	0.011276	244562	GCST90027560	6	26341314	0.0535559	2.17e-06	7738	0.00289163	7738	1.12387e-06	244562	TRUE	4.90087e-06	0.0149199	117.168	42.2042	22.4345
rs11824678	C	A	C	A	0.247837	-0.0013023	0.105913	0.1319	98455744	0.919836	0.0129401	244562	GCST90027560	11	98326473	0.0552553	7.28e-06	7738	0.00259382	7738	4.14151e-08	244562	TRUE	1.10164e-05	0.011633	91.052	42.2042	20.118
rs35620562	C	T	C	T	-0.195456	0.00729354	0.189708	0.1564	47537741	0.503749	0.0109086	244562	GCST90027560	12	47931524	0.0438952	8.48e-06	7738	0.00255644	7738	1.82789e-06	244562	TRUE	2.00104e-05	0.0117451	91.9396	42.2042	19.8273
rs3865408	T	A	T	A	-0.274957	0.00660352	0.104985	0.1176	26838910	0.555465	0.0112002	244562	GCST90027560	18	24418874	0.0577701	1.94e-06	7738	0.00291969	7738	1.4214e-06	244562	TRUE	4.64633e-06	0.0142075	111.493	42.2042	22.6529
rs4075150	A	G	A	G	-0.159952	-0.00891507	0.500912	0.454	227388893	0.244215	0.0076556	244562	GCST90027560	2	228253609	0.0340355	2.61e-06	7738	0.00284682	7738	5.54502e-06	244562	TRUE	9.84444e-06	0.0127923	100.243	42.2042	22.0859
rs4306193	A	C	A	C	0.147132	0.0225893	0.494895	0.501	211038330	0.00331849	0.00769237	244562	GCST90027560	1	211211672	0.0332888	9.88e-06	7738	0.00251887	7738	3.52601e-05	244562	TRUE	0.000125415	0.0108228	84.6411	42.2042	19.5352
rs62112542	A	G	A	G	-0.184047	-0.0142453	0.235468	0.2843	4940938	0.0717579	0.00791119	244562	GCST90027560	19	4940950	0.0404972	5.5e-06	7738	0.00266277	7738	1.32577e-05	244562	TRUE	3.22579e-05	0.0121959	95.5126	42.2042	20.6542
rs6444585	A	G	A	G	0.170074	0.0237962	0.683973	0.6984	191660061	0.0044949	0.00837551	244562	GCST90027560	3	191377850	0.037838	6.96e-06	7738	0.00260478	7738	3.3006e-05	244562	TRUE	8.6488e-05	0.0125046	97.9604	42.2042	20.2032
rs76253510	A	G	A	G	0.321464	-0.00400195	0.0672308	0.07975	210628550	0.847613	0.0208256	244562	GCST90027560	1	210801894	0.0690886	3.27e-06	7738	0.00279076	7738	1.50995e-07	244562	TRUE	5.49443e-06	0.012961	101.583	42.2042	21.6497
rs875897	G	C	G	C	-0.241421	-0.000519564	0.867016	0.8497	27161236	0.958991	0.0101044	244562	GCST90027560	7	27200855	0.0516772	2.99e-06	7738	0.00281327	7738	1.08112e-08	244562	TRUE	4.47342e-06	0.0134402	105.39	42.2042	21.8249
rs12006002	T	C	T	C	-0.100171	0.0113686	0.339664	0.2904	18166901	0.174973	0.00838147	244562	GCST90027561	9	18166899	0.0216243	3.62e-06	7738	0.00276618	7738	7.52289e-06	244562	TRUE	1.55414e-05	0.0045012	34.9787	42.2042	21.4585
rs17175056	G	A	G	A	0.14359	0.0183515	0.121156	0.1738	94127030	0.113181	0.0115851	244562	GCST90027561	13	94779284	0.0314645	5.03e-06	7738	0.00268487	7738	1.02601e-05	244562	TRUE	2.51566e-05	0.00439071	34.1164	42.2042	20.826
rs242053	T	C	T	C	-0.218655	-0.0198884	0.058192	0.07873	4691818	0.237518	0.0168373	244562	GCST90027561	1	4751878	0.049245	8.99e-06	7738	0.00254198	7738	5.70517e-06	244562	TRUE	3.14659e-05	0.00524052	40.7542	42.2042	19.7149
rs2616174	T	C	T	C	-0.111196	0.0184337	0.257394	0.2362	20741226	0.0279441	0.00838631	244562	GCST90027561	8	20598737	0.0240432	3.75e-06	7738	0.00275726	7738	1.97555e-05	244562	TRUE	3.0981e-05	0.00472678	36.74	42.2042	21.3892
rs2826386	T	C	T	C	0.099493	-0.0133403	0.416276	0.4468	20552847	0.0841996	0.00772535	244562	GCST90027561	21	21925160	0.0212898	2.96e-06	7738	0.00281515	7738	1.21928e-05	244562	TRUE	1.73706e-05	0.00481065	37.3951	42.2042	21.8395
rs28490985	A	T	A	T	0.113361	0.00648163	0.226437	0.2853	53274549	0.465599	0.0088831	244562	GCST90027561	15	53566746	0.0255265	8.96e-06	7738	0.00254286	7738	2.17697e-06	244562	TRUE	2.21132e-05	0.00450195	34.9846	42.2042	19.7217
rs6052371	T	C	T	C	0.117615	0.00178161	0.214021	0.2372	4122718	0.837713	0.00869843	244562	GCST90027561	20	4103365	0.0259209	5.69e-06	7738	0.00265433	7738	1.71537e-07	244562	TRUE	9.45703e-06	0.00465396	36.1714	42.2042	20.5885
rs61828192	G	C	G	C	0.160365	-0.0161966	0.147456	0.1524	8839754	0.0877991	0.00948766	244562	GCST90027561	10	8881717	0.0302332	1.13e-07	7738	0.00362375	7738	1.19162e-05	244562	TRUE	8.65809e-07	0.00646589	50.3457	42.2042	28.1353
rs743920	G	C	G	C	-0.166238	0.0172239	0.126928	0.1155	29225139	0.155777	0.0121345	244562	GCST90027561	22	29621128	0.0353105	2.5e-06	7738	0.00285689	7738	8.23819e-06	244562	TRUE	1.16457e-05	0.00612489	47.6741	42.2042	22.1642
rs10089785	C	T	C	T	0.101733	0.000741886	0.401736	0.3916	108587740	0.927278	0.00812847	244562	GCST90027562	8	109599969	0.0228451	8.46e-06	7738	0.00255687	7738	3.40621e-08	244562	TRUE	1.26407e-05	0.00497493	38.6785	42.2042	19.8307
rs12087936	A	G	A	G	-0.145661	0.0119631	0.141332	0.1554	59074052	0.228529	0.00993484	244562	GCST90027562	1	59539724	0.0311788	2.99e-06	7738	0.00281338	7738	5.92895e-06	244562	TRUE	1.15283e-05	0.00514971	40.0443	42.2042	21.8257
rs2116877	T	C	T	C	-0.164697	-0.00438463	0.902589	0.8957	11247764	0.720523	0.0122558	244562	GCST90027562	19	11358440	0.0371034	9.04e-06	7738	0.00254052	7738	5.23357e-07	244562	TRUE	1.66599e-05	0.00476979	37.076	42.2042	19.7035
rs2913384	A	G	A	G	-0.188034	0.0154653	0.924665	0.8834	158643697	0.166903	0.0111887	244562	GCST90027562	5	158070705	0.0415236	5.94e-06	7738	0.00264373	7738	7.8121e-06	244562	TRUE	2.50742e-05	0.00492588	38.2953	42.2042	20.5061
rs35586568	A	G	A	G	0.228485	-0.000254415	0.0535691	0.05419	115842542	0.991597	0.0241569	244562	GCST90027562	2	116600118	0.0513702	8.67e-06	7738	0.00255075	7738	4.53544e-10	244562	TRUE	1.21372e-05	0.00529357	41.169	42.2042	19.783
rs61344468	G	A	G	A	-0.156926	0.0218888	0.124387	0.1063	10007300	0.142288	0.0149175	244562	GCST90027562	17	9910617	0.0339806	3.87e-06	7738	0.00274926	7738	8.80365e-06	244562	TRUE	1.80728e-05	0.00536423	41.7214	42.2042	21.3269
rs68116107	G	A	G	A	0.161386	-0.0135263	0.111485	0.136	43091268	0.379534	0.0153926	244562	GCST90027562	2	43318406	0.0364803	9.69e-06	7738	0.00252349	7738	3.15754e-06	244562	TRUE	2.67392e-05	0.00515992	40.1242	42.2042	19.5711
rs7221236	G	A	G	A	0.10055	0.0026702	0.638583	0.6401	70892612	0.740652	0.00806731	244562	GCST90027562	17	68888753	0.0226016	8.63e-06	7738	0.00255188	7738	4.47965e-07	244562	TRUE	1.56051e-05	0.00466681	36.2717	42.2042	19.7918
rs76525743	C	T	C	T	0.199721	0.00364645	0.074339	0.05419	157103819	0.831726	0.0171607	244562	GCST90027562	1	157073611	0.0414867	1.48e-06	7738	0.00298685	7738	1.84623e-07	244562	TRUE	2.60352e-06	0.00548967	42.7025	42.2042	23.1755
rs11771094	A	G	A	G	-0.158301	-0.00404593	0.400993	0.3978	138661479	0.618206	0.00811793	244562	GCST90027563	7	138346224	0.0355869	8.66e-06	7738	0.0025513	7738	1.01569e-06	244562	TRUE	1.78545e-05	0.0120383	94.2632	42.2042	19.7873
rs12821396	T	C	T	C	0.396267	0.0102502	0.0510083	0.03476	107898607	0.635889	0.0216498	244562	GCST90027563	12	108292384	0.0792925	5.81e-07	7738	0.00321807	7738	9.1658e-07	244562	TRUE	1.33502e-06	0.0152023	119.42	42.2042	24.9754
rs147911740	A	G	A	G	0.345903	-0.00284119	0.0662413	0.05419	105672159	0.861269	0.0162578	244562	GCST90027563	7	105312606	0.0714976	1.31e-06	7738	0.00301646	7738	1.2488e-07	244562	TRUE	2.24608e-06	0.0148014	116.224	42.2042	23.4059
rs2078597	G	A	G	A	-0.294388	-0.00510545	0.10434	0.1319	34424646	0.63374	0.0107152	244562	GCST90027563	1	34890247	0.059051	6.19e-07	7738	0.0032024	7738	9.28291e-07	244562	TRUE	1.42174e-06	0.0161981	127.372	42.2042	24.8534
rs34838879	G	A	G	A	0.416083	-0.0171179	0.0559422	0.06033	24180556	0.278913	0.0158094	244562	GCST90027563	13	24754695	0.0871847	1.82e-06	7738	0.00293553	7738	4.79381e-06	244562	TRUE	6.59025e-06	0.0182864	144.099	42.2042	22.7761
rs414161	G	A	G	A	0.169392	-0.00385043	0.28364	0.3027	92295397	0.637379	0.00816865	244562	GCST90027563	12	92689173	0.0379151	7.91e-06	7738	0.00257351	7738	9.08514e-07	244562	TRUE	1.60372e-05	0.0116604	91.2693	42.2042	19.96
rs56931274	T	G	T	G	-0.175476	0.00180727	0.283056	0.273	112007615	0.844539	0.00921649	244562	GCST90027563	3	111726462	0.0394446	8.64e-06	7738	0.00255173	7738	1.57228e-07	244562	TRUE	1.40256e-05	0.0124975	97.9042	42.2042	19.7907
rs7125672	G	A	G	A	-0.178111	0.00346455	0.562181	0.5757	91221492	0.656649	0.00779348	244562	GCST90027563	11	90954660	0.0359808	7.41e-07	7738	0.00315755	7738	8.08062e-07	244562	TRUE	1.64328e-06	0.0156164	122.725	42.2042	24.5042
rs74471865	A	G	A	G	0.341856	0.00703306	0.0533491	0.05419	7334347	0.779879	0.0251651	244562	GCST90027563	11	7355578	0.0771678	9.42e-06	7738	0.00253045	7738	3.19379e-07	244562	TRUE	1.62858e-05	0.0118041	92.4074	42.2042	19.6252
rs118026734	T	C	T	C	0.205727	-0.0124641	0.0577757	0.04806	59724972	0.456517	0.0167395	244562	GCST90027564	15	60017171	0.0456228	6.5e-06	7738	0.00262157	7738	2.26701e-06	244562	TRUE	1.65458e-05	0.004608	35.8125	42.2042	20.3338
rs12606812	T	G	T	G	0.0896761	0.00839843	0.574679	0.5389	46544006	0.278076	0.00774298	244562	GCST90027564	18	44123969	0.0196441	4.99e-06	7738	0.00268661	7738	4.81053e-06	244562	TRUE	1.6904e-05	0.0039312	30.5318	42.2042	20.8396
rs2484671	C	G	C	G	-0.156409	0.00720314	0.0962477	0.1155	43706454	0.560719	0.0123813	244562	GCST90027564	10	44201902	0.0341626	4.69e-06	7738	0.00270228	7738	1.38396e-06	244562	TRUE	1.06543e-05	0.00425592	33.0645	42.2042	20.9615
rs321605	T	C	T	C	-0.0920684	0.0192472	0.607674	0.5808	35552241	0.0163181	0.00801392	244562	GCST90027564	17	33879260	0.0199262	3.83e-06	7738	0.00275207	7738	2.35858e-05	244562	TRUE	3.68845e-05	0.00404175	31.3938	42.2042	21.3487
rs3764571	C	T	C	T	-0.0948593	-0.00211346	0.307387	0.3149	376382	0.791475	0.00799355	244562	GCST90027564	19	376382	0.020931	5.84e-06	7738	0.00264796	7738	2.8584e-07	244562	TRUE	1.01745e-05	0.00383147	29.7543	42.2042	20.539
rs4148913	G	A	G	A	0.0924275	0.00131022	0.443434	0.41	71969994	0.867558	0.00785687	244562	GCST90027564	10	73729752	0.019703	2.72e-06	7738	0.00283653	7738	1.13711e-07	244562	TRUE	4.49914e-06	0.00421675	32.7589	42.2042	22.0058
rs73816874	T	C	T	C	0.0869627	0.00171964	0.434074	0.4182	16654856	0.826622	0.00785095	244562	GCST90027564	3	16696363	0.0195266	8.45e-06	7738	0.00255732	7738	1.96176e-07	244562	TRUE	1.39757e-05	0.00371552	28.8504	42.2042	19.8341
rs78689694	C	G	C	G	0.125408	-0.00277604	0.149301	0.1299	126364925	0.800011	0.0109581	244562	GCST90027564	11	126234820	0.0268035	2.89e-06	7738	0.00282178	7738	2.6242e-07	244562	TRUE	5.12302e-06	0.00399502	31.0294	42.2042	21.8911
rs79195460	T	C	T	C	0.193987	-0.0127051	0.0548497	0.07873	26391097	0.532802	0.0203694	244562	GCST90027564	1	26717588	0.043204	7.12e-06	7738	0.00259927	7738	1.59079e-06	244562	TRUE	1.63815e-05	0.00390167	30.3015	42.2042	20.1603
rs9979263	G	A	G	A	0.110587	0.00845145	0.714393	0.7076	16630179	0.297841	0.00811801	244562	GCST90027564	21	18002498	0.025015	9.83e-06	7738	0.00251997	7738	4.43176e-06	244562	TRUE	3.07106e-05	0.0049905	38.8002	42.2042	19.5437
rs1154029	C	T	C	T	-0.0817275	-0.0018854	0.518805	0.544	153559606	0.806489	0.00769683	244562	GCST90027565	6	153880741	0.0184649	9.59e-06	7738	0.00252597	7738	2.45356e-07	244562	TRUE	1.61263e-05	0.00333497	25.8856	42.2042	19.5904
rs12357875	T	C	T	C	0.157672	-0.0149624	0.0746233	0.04397	11382596	0.327961	0.0152954	244562	GCST90027565	10	11424595	0.0337872	3.06e-06	7738	0.00280716	7738	3.91286e-06	244562	TRUE	9.83394e-06	0.00343346	26.6528	42.2042	21.7773
rs12605920	T	C	T	C	-0.181525	-0.0148984	0.0546815	0.05419	68501006	0.326583	0.0151866	244562	GCST90027565	18	66168243	0.0410936	9.99e-06	7738	0.00251602	7738	3.93521e-06	244562	TRUE	2.97682e-05	0.0034066	26.4436	42.2042	19.513
rs1436177	A	G	A	G	-0.0999631	0.0072578	0.243165	0.2209	87835569	0.488757	0.0104838	244562	GCST90027565	12	88229346	0.0211644	2.32e-06	7738	0.00287541	7738	1.95968e-06	244562	TRUE	5.9981e-06	0.003678	28.558	42.2042	22.3084
rs1453942	G	A	G	A	0.0838797	0.0102649	0.559055	0.5297	82080529	0.182873	0.00770661	244562	GCST90027565	11	81791571	0.0180643	3.43e-06	7738	0.00277937	7738	7.25428e-06	244562	TRUE	1.45082e-05	0.00346883	26.9283	42.2042	21.5611
rs16824588	C	T	C	T	-0.0812684	0.0115444	0.417526	0.4294	1968793	0.14494	0.00791993	244562	GCST90027565	1	1900232	0.017996	6.3e-06	7738	0.00262925	7738	8.68782e-06	244562	TRUE	2.80575e-05	0.00321243	24.9314	42.2042	20.3935
rs28416225	A	G	A	G	-0.109389	-0.012877	0.20514	0.2209	100829355	0.166114	0.00929882	244562	GCST90027565	10	102589112	0.0242163	6.27e-06	7738	0.0026307	7738	7.84124e-06	244562	TRUE	2.63788e-05	0.00390228	30.3063	42.2042	20.4048
rs3936142	A	G	A	G	0.0982908	0.0183659	0.70319	0.6738	133713731	0.0456709	0.0091902	244562	GCST90027565	2	134471302	0.0199481	8.34e-07	7738	0.00312857	7738	1.63298e-05	244562	TRUE	6.84526e-06	0.0040328	31.3241	42.2042	24.2785
rs58803641	G	A	G	A	0.1277	-0.0114161	0.117129	0.1288	227371213	0.377444	0.0129344	244562	GCST90027565	2	228235929	0.0276583	3.89e-06	7738	0.00274802	7738	3.18534e-06	244562	TRUE	1.13972e-05	0.00337267	26.1792	42.2042	21.3172
rs831864	C	T	C	T	0.146258	0.000654682	0.903397	0.8947	181399224	0.963371	0.0142558	244562	GCST90027565	2	182263951	0.0316506	3.82e-06	7738	0.00275272	7738	8.62362e-09	244562	TRUE	5.64669e-06	0.00373369	28.9921	42.2042	21.3538
rs936232	A	G	A	G	-0.0863461	-0.00557532	0.355818	0.3436	25811448	0.489897	0.00807464	244562	GCST90027565	4	25813070	0.0186802	3.79e-06	7738	0.00275428	7738	1.94943e-06	244562	TRUE	9.52703e-06	0.00341784	26.5311	42.2042	21.366
rs11110734	T	C	T	C	0.128847	0.0120342	0.0881286	0.07669	101274038	0.381317	0.013746	244562	GCST90027566	12	101667816	0.0290875	9.44e-06	7738	0.00252999	7738	3.13399e-06	244562	TRUE	2.60174e-05	0.00266827	20.6969	42.2042	19.6217
rs13139468	G	A	G	A	-0.0872292	0.0220383	0.754715	0.771	64898258	0.0158844	0.0091386	244562	GCST90027566	4	65763976	0.0194561	7.35e-06	7738	0.0025916	7738	2.37794e-05	244562	TRUE	6.61635e-05	0.00281714	21.8549	42.2042	20.1007
rs13377496	T	C	T	C	-0.13346	0.00955878	0.0869516	0.1094	132994204	0.33986	0.010015	244562	GCST90027566	11	132864099	0.0301469	9.56e-06	7738	0.00252698	7738	3.72488e-06	244562	TRUE	2.79743e-05	0.00282816	21.9407	42.2042	19.5982
rs1382794	C	A	C	A	-0.0839889	-0.00989195	0.647738	0.6677	175039935	0.211706	0.00792061	244562	GCST90027566	4	175961086	0.0184268	5.17e-06	7738	0.00267832	7738	6.37762e-06	244562	TRUE	1.98484e-05	0.00321913	24.9836	42.2042	20.7751
rs17509881	A	T	A	T	0.176081	-0.0107326	0.0603708	0.05726	65090497	0.502375	0.0160007	244562	GCST90027566	16	65124400	0.0358414	8.98e-07	7738	0.00311018	7738	1.83969e-06	244562	TRUE	2.398e-06	0.00351753	27.3077	42.2042	24.1354
rs2039970	T	C	T	C	0.0761333	0.000203437	0.633698	0.6738	60336157	0.980572	0.00835409	244562	GCST90027566	13	60910291	0.0170182	7.69e-06	7738	0.00258038	7738	2.4248e-09	244562	TRUE	1.09211e-05	0.00269092	20.8731	42.2042	20.0135
rs2199729	A	C	A	C	0.139488	-0.00333031	0.0812798	0.07873	94661086	0.811529	0.0139663	244562	GCST90027566	15	95204315	0.0311437	7.5e-06	7738	0.00258638	7738	2.325e-07	244562	TRUE	1.26706e-05	0.00290583	22.545	42.2042	20.0601
rs36081122	A	G	A	G	0.158488	0.00782065	0.0672964	0.08691	222382317	0.648079	0.0171343	244562	GCST90027566	1	222555659	0.0345607	4.52e-06	7738	0.00271102	7738	8.51858e-07	244562	TRUE	9.30654e-06	0.00315325	24.4707	42.2042	21.0294
rs4278144	C	A	C	A	0.0814217	-0.00265418	0.35137	0.3405	61784648	0.758628	0.00863758	244562	GCST90027566	8	62697207	0.0172178	2.26e-06	7738	0.0028824	7738	3.86093e-07	244562	TRUE	4.23455e-06	0.00302184	23.4478	42.2042	22.3627
rs4751058	A	G	A	G	-0.10964	0.0179595	0.15327	0.1779	129075861	0.12216	0.0116185	244562	GCST90027566	10	130874125	0.022702	1.37e-06	7738	0.00300598	7738	9.77013e-06	244562	TRUE	7.4096e-06	0.00312011	24.2127	42.2042	23.3244
rs483485	T	C	T	C	0.140699	-0.0383793	0.917203	0.8978	79770693	0.00175259	0.0122647	244562	GCST90027566	18	77530693	0.0305173	4.02e-06	7738	0.0027402	7738	4.00382e-05	244562	TRUE	6.6364e-05	0.00300671	23.3301	42.2042	21.2564
rs7072479	C	A	C	A	-0.0728056	0.00359209	0.476562	0.4734	65257054	0.640621	0.00769463	244562	GCST90027566	10	67016812	0.0162802	7.75e-06	7738	0.00257853	7738	8.91113e-07	244562	TRUE	1.56719e-05	0.0026445	20.5121	42.2042	19.9991
rs72676149	T	C	T	C	-0.168586	0.0192281	0.0689379	0.06135	63421161	0.334802	0.0199361	244562	GCST90027566	1	63886832	0.032424	2e-07	7738	0.0034824	7738	3.80369e-06	244562	TRUE	7.54004e-07	0.00364846	28.3278	42.2042	27.034
rs7268601	A	T	A	T	0.0814429	-0.0155902	0.31818	0.3456	61054116	0.0568892	0.00818744	244562	GCST90027566	20	59629172	0.0180135	6.15e-06	7738	0.00263541	7738	1.48257e-05	244562	TRUE	3.85985e-05	0.00287792	22.3279	42.2042	20.4414
rs72815470	A	T	A	T	-0.163954	0.02619	0.0605177	0.05317	175468619	0.120673	0.0168755	244562	GCST90027566	5	174895622	0.0370193	9.47e-06	7738	0.00252913	7738	9.84846e-06	244562	TRUE	4.37748e-05	0.00305665	23.7187	42.2042	19.615
rs114981645	A	G	A	G	-0.198497	-0.0340477	0.0535532	0.03579	7233456	0.141862	0.0231792	244562	GCST90027567	4	7235183	0.0371633	9.23e-08	7738	0.00367421	7738	8.82248e-06	244562	TRUE	5.79482e-07	0.00399411	31.0223	42.2042	28.5285
rs12611718	A	G	A	G	0.0747537	-0.00149526	0.554349	0.6033	176767986	0.850009	0.00790696	244562	GCST90027567	2	177632714	0.0166171	6.84e-06	7738	0.00260918	7738	1.46228e-07	244562	TRUE	1.11398e-05	0.00276105	21.4186	42.2042	20.2374
rs1335509	A	G	A	G	-0.123858	0.0185404	0.875546	0.8701	21753139	0.112958	0.0116971	244562	GCST90027567	9	21753138	0.0265736	3.15e-06	7738	0.00280035	7738	1.02728e-05	244562	TRUE	1.64023e-05	0.00334323	25.95	42.2042	21.7244
rs1945878	C	T	C	T	0.10788	-0.00199303	0.841539	0.8579	81357527	0.894546	0.0150356	244562	GCST90027567	11	81068570	0.0224058	1.47e-06	7738	0.00298776	7738	7.18458e-08	244562	TRUE	2.42232e-06	0.00310391	24.0866	42.2042	23.1825
rs62191280	C	G	C	G	-0.1023	0.0137239	0.168202	0.1421	241679760	0.186916	0.0103988	244562	GCST90027567	2	242619175	0.022186	4.01e-06	7738	0.00274085	7738	7.12196e-06	244562	TRUE	1.65987e-05	0.0029284	22.7206	42.2042	21.2615
rs73210347	T	A	T	A	0.131763	0.00357162	0.0998431	0.06646	59255452	0.836005	0.0172537	244562	GCST90027567	13	59829586	0.0278078	2.15e-06	7738	0.00289387	7738	1.75219e-07	244562	TRUE	3.72176e-06	0.00312071	24.2174	42.2042	22.4519
rs78561414	C	T	C	T	-0.111273	0.0201685	0.132735	0.1084	227970194	0.137735	0.0135881	244562	GCST90027567	2	228834910	0.0243866	5.05e-06	7738	0.00268407	7738	9.00827e-06	244562	TRUE	2.33493e-05	0.00285067	22.1158	42.2042	20.8198
rs112199808	A	C	A	C	-0.129859	-0.0147257	0.0920788	0.1196	35175647	0.314528	0.0146413	244562	GCST90027568	19	35666550	0.028176	4.05e-06	7738	0.00273828	7738	4.13625e-06	244562	TRUE	1.30552e-05	0.00281956	21.8738	42.2042	21.2415
rs17565738	C	T	C	T	0.109393	-0.0127109	0.130595	0.1176	220280769	0.326095	0.0129438	244562	GCST90027568	1	220454111	0.0244461	7.65e-06	7738	0.00258179	7738	3.94316e-06	244562	TRUE	2.32029e-05	0.00271743	21.0793	42.2042	20.0244
rs1891103	A	T	A	T	-0.105142	-0.00906426	0.152483	0.1667	24305739	0.432893	0.0115579	244562	GCST90027568	13	24879877	0.0230494	5.08e-06	7738	0.00268256	7738	2.51492e-06	244562	TRUE	1.35207e-05	0.00285728	22.1672	42.2042	20.8081
rs2356936	G	C	G	C	-0.0826788	-0.0151702	0.752605	0.7137	146062666	0.0557802	0.0079311	244562	GCST90027568	4	146983818	0.0185312	8.13e-06	7738	0.00256654	7738	1.49597e-05	244562	TRUE	5.00068e-05	0.00254552	19.7424	42.2042	19.9059
rs3858437	A	G	A	G	0.08431	-0.00851563	0.227581	0.2566	32364112	0.360878	0.00932001	244562	GCST90027568	11	32385658	0.0188692	7.89e-06	7738	0.00257404	7738	3.41361e-06	244562	TRUE	2.26583e-05	0.00249906	19.3812	42.2042	19.9642
rs7012282	C	G	C	G	-0.108652	-0.00542432	0.130547	0.1626	17763037	0.61308	0.0107267	244562	GCST90027568	8	17620546	0.0237076	4.58e-06	7738	0.00270774	7738	1.04561e-06	244562	TRUE	9.80961e-06	0.0026799	20.7874	42.2042	21.0039
rs7422743	T	C	T	C	0.0778904	-0.0016314	0.640166	0.6166	76447177	0.841335	0.00814942	244562	GCST90027568	2	76674303	0.0168419	3.75e-06	7738	0.00275721	7738	1.63864e-07	244562	TRUE	6.30453e-06	0.00279507	21.6833	42.2042	21.3888
rs9404304	T	C	T	C	0.0926412	0.00603695	0.20735	0.2004	103037682	0.485842	0.00866211	244562	GCST90027568	6	103485557	0.0203797	5.47e-06	7738	0.00266402	7738	1.9861e-06	244562	TRUE	1.3538e-05	0.00282113	21.886	42.2042	20.6639
rs949889	T	C	T	C	-0.0989242	-0.0122122	0.823369	0.8344	115398843	0.271998	0.0111174	244562	GCST90027568	2	116156419	0.0207844	1.94e-06	7738	0.00291974	7738	4.93391e-06	244562	TRUE	7.08604e-06	0.0028464	22.0826	42.2042	22.6532
rs1076198	T	G	T	G	0.0948556	-0.00709437	0.171427	0.1728	33023115	0.473048	0.00988723	244562	GCST90027569	17	31350133	0.0212868	8.35e-06	7738	0.00256021	7738	2.10519e-06	244562	TRUE	2.04939e-05	0.00255603	19.8241	42.2042	19.8566
rs1802608	T	C	T	C	-0.156526	0.00298564	0.0601283	0.07464	72139678	0.815621	0.012804	244562	GCST90027569	11	71850722	0.0346435	6.24e-06	7738	0.00263189	7738	2.22331e-07	244562	TRUE	1.05627e-05	0.00276918	21.4818	42.2042	20.4141
rs2555143	G	T	G	T	0.073762	-0.0192529	0.611075	0.635	6520350	0.0130182	0.00775304	244562	GCST90027569	11	6541580	0.0164806	7.62e-06	7738	0.00258273	7738	2.52146e-05	244562	TRUE	7.20084e-05	0.00258616	20.0584	42.2042	20.0318
rs3217852	C	G	C	G	-0.0863883	0.013983	0.221903	0.2076	4288600	0.131058	0.00926061	244562	GCST90027569	12	4397766	0.0195063	9.48e-06	7738	0.00252897	7738	9.32248e-06	244562	TRUE	4.24335e-05	0.00257713	19.9882	42.2042	19.6137
rs7713337	C	T	C	T	0.0823339	0.00934602	0.348096	0.3303	75733959	0.242079	0.00798937	244562	GCST90027569	5	75029784	0.0171058	1.49e-06	7738	0.00298576	7738	5.59551e-06	244562	TRUE	5.86048e-06	0.00307659	23.874	42.2042	23.167
rs79744905	C	A	C	A	0.0965123	0.0138513	0.16705	0.182	57084253	0.145019	0.00950442	244562	GCST90027569	2	57311388	0.0217048	8.72e-06	7738	0.00254935	7738	8.68441e-06	244562	TRUE	3.77932e-05	0.00259215	20.105	42.2042	19.7721
rs10484603	G	A	G	A	0.138656	0.00839103	0.105581	0.08793	155403444	0.626431	0.0172387	244562	GCST90027570	6	155724578	0.0296705	2.97e-06	7738	0.00281505	7738	9.68807e-07	244562	TRUE	6.38233e-06	0.00363107	28.1923	42.2042	21.8387
rs11259346	T	C	T	C	0.0779607	-0.00533415	0.325841	0.3057	14796248	0.514942	0.00819174	244562	GCST90027570	10	14838247	0.0176125	9.58e-06	7738	0.00252636	7738	1.73377e-06	244562	TRUE	2.21612e-05	0.00267024	20.7122	42.2042	19.5934
rs117176738	G	A	G	A	-0.164783	-0.00138299	0.0555993	0.05726	72628685	0.93888	0.0180364	244562	GCST90027570	11	72339729	0.0359195	4.48e-06	7738	0.00271311	7738	2.4041e-08	244562	TRUE	6.76571e-06	0.00285155	22.1226	42.2042	21.0457
rs12035670	T	C	T	C	-0.0832324	-0.00167532	0.332632	0.3763	52066962	0.832368	0.00791494	244562	GCST90027570	1	52532634	0.0177472	2.73e-06	7738	0.00283515	7738	1.83195e-07	244562	TRUE	4.69687e-06	0.0030757	23.867	42.2042	21.9951
rs141529746	A	G	A	G	-0.104617	-0.00448614	0.15493	0.1329	6149936	0.720799	0.0125525	244562	GCST90027570	19	6149947	0.023567	9.03e-06	7738	0.00254082	7738	5.22278e-07	244562	TRUE	1.66354e-05	0.00286591	22.2344	42.2042	19.7059
rs2831866	A	G	A	G	-0.168153	-0.0142331	0.0718476	0.08487	28502661	0.251373	0.0124088	244562	GCST90027570	21	29874982	0.0359473	2.9e-06	7738	0.00282055	7738	5.37966e-06	244562	TRUE	1.07161e-05	0.00377112	29.2838	42.2042	21.8815
rs67977127	G	C	G	C	0.121055	-0.0165831	0.157117	0.1503	99562895	0.255986	0.0145987	244562	GCST90027570	2	100179357	0.0235185	2.64e-07	7738	0.00341307	7738	5.27613e-06	244562	TRUE	1.14113e-06	0.00388138	30.1433	42.2042	26.4939
rs72923573	A	G	A	G	0.117939	0.00358434	0.115623	0.09714	192689907	0.775766	0.0125837	244562	GCST90027570	2	193554633	0.0261704	6.59e-06	7738	0.00261842	7738	3.31756e-07	244562	TRUE	1.16061e-05	0.00284464	22.0689	42.2042	20.3093
rs838736	A	G	A	G	0.0730335	-0.00518001	0.539543	0.5358	233415586	0.503462	0.00774231	244562	GCST90027570	2	234324232	0.0165018	9.61e-06	7738	0.00252561	7738	1.83035e-06	244562	TRUE	2.25368e-05	0.00265027	20.5569	42.2042	19.5876
rs11090280	C	T	C	T	0.0724173	-0.00646568	0.484462	0.5266	23686225	0.407323	0.00780301	244562	GCST90027571	22	24028412	0.0159664	5.74e-06	7738	0.00265217	7738	2.80749e-06	244562	TRUE	1.57318e-05	0.0026196	20.3185	42.2042	20.5717
rs11732083	A	C	A	C	0.0887252	-0.00653348	0.231878	0.1963	136428066	0.49618	0.00960082	244562	GCST90027571	4	137349221	0.0192215	3.91e-06	7738	0.00274668	7738	1.89359e-06	244562	TRUE	9.72978e-06	0.00280423	21.7545	42.2042	21.3069
rs1366290	G	A	G	A	-0.07591	0.00228716	0.469278	0.4458	59029016	0.76996	0.0078213	244562	GCST90027571	8	59941575	0.016073	2.33e-06	7738	0.002875	7738	3.49663e-07	244562	TRUE	4.30408e-06	0.00287029	22.2685	42.2042	22.3051
rs1813601	C	A	C	A	0.0790939	-0.00980131	0.701239	0.7331	21269889	0.231866	0.00819805	244562	GCST90027571	4	21271512	0.0177905	8.75e-06	7738	0.0025485	7738	5.84466e-06	244562	TRUE	3.10419e-05	0.00262123	20.3312	42.2042	19.7656
rs1940600	T	G	T	G	0.0791541	0.00186253	0.59842	0.6145	5888921	0.812649	0.00785844	244562	GCST90027571	18	5888920	0.0169686	3.09e-06	7738	0.00280491	7738	2.29693e-07	244562	TRUE	5.39709e-06	0.00301131	23.3658	42.2042	21.7598
rs2548882	C	A	C	A	-0.100029	-0.00481852	0.822267	0.8129	78682686	0.624452	0.00984274	244562	GCST90027571	16	78716583	0.0215575	3.48e-06	7738	0.00277544	7738	9.79962e-07	244562	TRUE	7.45421e-06	0.00292458	22.6909	42.2042	21.5305
rs2714053	G	A	G	A	-0.0959623	0.00312733	0.598328	0.6155	123441355	0.685679	0.00772703	244562	GCST90027571	11	123312063	0.017586	4.85e-08	7738	0.00383427	7738	6.69786e-07	244562	TRUE	1.17212e-07	0.00442631	34.3942	42.2042	29.7761
rs73021847	C	T	C	T	0.167156	-0.00278491	0.055348	0.03988	159011084	0.859322	0.0157129	244562	GCST90027571	1	158980874	0.0378294	9.93e-06	7738	0.00251753	7738	1.28447e-07	244562	TRUE	1.57968e-05	0.00292178	22.6691	42.2042	19.5247
rs73401412	T	C	T	C	-0.115537	0.00750438	0.143375	0.2045	26517727	0.475015	0.0105053	244562	GCST90027571	18	24097691	0.024899	3.48e-06	7738	0.00277559	7738	2.08654e-06	244562	TRUE	8.95206e-06	0.00327896	25.4495	42.2042	21.5317
rs77651025	C	G	C	G	0.16522	-0.000677422	0.0568179	0.07055	103226188	0.978037	0.0246067	244562	GCST90027571	13	103878538	0.0373153	9.53e-06	7738	0.00252776	7738	3.09904e-09	244562	TRUE	1.34697e-05	0.00292574	22.7	42.2042	19.6043
rs9428255	T	C	T	C	-0.13401	0.0247413	0.915129	0.8845	118568225	0.0425118	0.012197	244562	GCST90027571	1	119110848	0.0299121	7.46e-06	7738	0.00258785	7738	1.68247e-05	244562	TRUE	5.04466e-05	0.00278963	21.6409	42.2042	20.0715
rs993597	G	A	G	A	-0.0846073	0.00556675	0.752699	0.7474	67743794	0.494702	0.00815224	244562	GCST90027571	3	67794218	0.0189502	8.02e-06	7738	0.00257012	7738	1.90662e-06	244562	TRUE	1.91988e-05	0.00266497	20.6713	42.2042	19.9337
rs116996492	T	C	T	C	-0.140893	0.0167775	0.113678	0.0818	101136571	0.295167	0.0160266	244562	GCST90027572	15	101676776	0.0282078	5.89e-07	7738	0.00321459	7738	4.4811e-06	244562	TRUE	2.22972e-06	0.00400015	31.0695	42.2042	24.9483
rs12530267	A	G	A	G	0.0987123	0.00436658	0.19027	0.2035	15736281	0.609564	0.00855025	244562	GCST90027572	6	15736512	0.0204932	1.46e-06	7738	0.00299024	7738	1.06645e-06	244562	TRUE	3.31414e-06	0.0030025	23.2973	42.2042	23.2019
rs1751578	T	C	T	C	-0.0769954	-0.00826422	0.446455	0.4509	207999380	0.28537	0.00773562	244562	GCST90027572	1	208172725	0.0164974	3.05e-06	7738	0.00280777	7738	4.66688e-06	244562	TRUE	1.05535e-05	0.00293015	22.7343	42.2042	21.782
rs1807675	G	T	G	T	-0.0726953	0.00739904	0.616934	0.6431	49674346	0.361286	0.00810483	244562	GCST90027572	22	50067994	0.0163102	8.31e-06	7738	0.00256132	7738	3.40782e-06	244562	TRUE	2.37689e-05	0.00249778	19.3712	42.2042	19.8653
rs2235334	C	T	C	T	-0.0835144	0.00927911	0.528302	0.5573	37508244	0.227089	0.00768207	244562	GCST90027572	22	37904251	0.0157276	1.1e-07	7738	0.00363163	7738	5.96579e-06	244562	TRUE	5.35836e-07	0.00347615	26.9853	42.2042	28.1967
rs2827430	A	G	A	G	-0.140764	0.0123493	0.077787	0.05317	22347940	0.557807	0.0210702	244562	GCST90027572	21	23720260	0.03022	3.19e-06	7738	0.0027968	7738	1.40462e-06	244562	TRUE	7.43101e-06	0.00284283	22.0549	42.2042	21.6967
rs4818783	G	C	G	C	-0.111704	-0.00129206	0.121313	0.1483	45496823	0.896247	0.00990815	244562	GCST90027572	21	46916737	0.024511	5.18e-06	7738	0.00267753	7738	6.95336e-08	244562	TRUE	8.12861e-06	0.00266017	20.6339	42.2042	20.769
rs62314649	A	G	A	G	-0.108276	-0.0044139	0.144953	0.1483	136729865	0.65057	0.00974434	244562	GCST90027572	4	137651020	0.0234693	3.96e-06	7738	0.00274381	7738	8.38985e-07	244562	TRUE	8.1747e-06	0.00290611	22.5472	42.2042	21.2845
rs6879880	C	T	C	T	0.0768625	-0.00393374	0.384954	0.4233	170219060	0.622663	0.00799411	244562	GCST90027572	5	169646064	0.0162327	2.19e-06	7738	0.00288984	7738	9.90114e-07	244562	TRUE	4.80378e-06	0.00279753	21.7024	42.2042	22.4206
rs7513344	A	C	A	C	0.181259	0.0150619	0.0865728	0.1176	4160035	0.290168	0.0142395	244562	GCST90027572	1	4220095	0.0301318	1.79e-09	7738	0.00465592	7738	4.5749e-06	244562	TRUE	9.90147e-09	0.00519618	40.4076	42.2042	36.1867
rs79033343	T	C	T	C	-0.137929	-0.00141087	0.0748113	0.07669	183319885	0.911779	0.0127341	244562	GCST90027572	1	183289020	0.0304922	6.08e-06	7738	0.00263797	7738	5.01943e-08	244562	TRUE	9.34107e-06	0.00263353	20.4268	42.2042	20.4613
rs1093520	G	T	G	T	0.155616	-0.00902857	0.915857	0.8834	98530106	0.479189	0.0127593	244562	GCST90027573	7	98159418	0.033323	3.01e-06	7738	0.00281113	7738	2.04738e-06	244562	TRUE	7.76983e-06	0.00373237	28.9817	42.2042	21.8082
rs113358976	C	A	C	A	0.1485	0.0134668	0.0665154	0.06135	77729198	0.383099	0.01544	244562	GCST90027573	12	78122978	0.0333825	8.65e-06	7738	0.00255146	7738	3.11061e-06	244562	TRUE	2.39101e-05	0.0027385	21.2432	42.2042	19.7886
rs136110	C	T	C	T	0.095786	0.00240433	0.208243	0.2495	46973764	0.780423	0.00862485	244562	GCST90027573	22	47369660	0.0202343	2.2e-06	7738	0.00288838	7738	3.1776e-07	244562	TRUE	4.03926e-06	0.00302549	23.4763	42.2042	22.4093
rs2813909	T	C	T	C	0.0906401	-0.000757616	0.220554	0.1708	244614742	0.937823	0.00971223	244562	GCST90027573	1	244778044	0.0193856	2.93e-06	7738	0.002818	7738	2.48814e-08	244562	TRUE	4.49044e-06	0.0028247	21.9137	42.2042	21.8616
rs4581848	C	T	C	T	0.176156	-0.0036194	0.0517591	0.04908	158423903	0.857937	0.02022	244562	GCST90027573	2	159280415	0.0394872	8.15e-06	7738	0.00256596	7738	1.31016e-07	244562	TRUE	1.30858e-05	0.003046	23.6359	42.2042	19.9013
rs62018962	A	C	A	C	-0.14606	-0.0269744	0.0988924	0.08793	95436288	0.0490027	0.0137025	244562	GCST90027573	15	95979517	0.0312382	2.93e-06	7738	0.00281805	7738	1.58456e-05	244562	TRUE	2.07836e-05	0.00380218	29.5259	42.2042	21.862
rs62097226	A	T	A	T	0.159255	0.00199568	0.0639117	0.04499	34804223	0.902526	0.0162951	244562	GCST90027573	18	32384187	0.0341364	3.08e-06	7738	0.00280552	7738	6.13312e-08	244562	TRUE	4.89377e-06	0.00303468	23.5478	42.2042	21.7646
rs62568138	G	A	G	A	0.161024	-0.00403344	0.057462	0.0501	76981352	0.806891	0.0165008	244562	GCST90027573	9	79596268	0.0355535	5.92e-06	7738	0.00264454	7738	2.44318e-07	244562	TRUE	1.0146e-05	0.00280861	21.7886	42.2042	20.5124
rs73200771	A	G	A	G	-0.174885	-0.0122814	0.0520806	0.03885	87893163	0.538997	0.0199915	244562	GCST90027573	12	88286940	0.0358193	1.05e-06	7738	0.00307198	7738	1.54318e-06	244562	TRUE	2.64458e-06	0.00301983	23.4322	42.2042	23.8381
rs75060356	A	G	A	G	-0.0951399	-0.01767	0.201451	0.1656	167769760	0.111281	0.011096	244562	GCST90027573	6	168170440	0.0201767	2.41e-06	7738	0.00286591	7738	1.03693e-05	244562	TRUE	1.29389e-05	0.00291223	22.5948	42.2042	22.2344
rs10515768	C	T	C	T	0.0758433	0.00130742	0.494986	0.4703	158657486	0.864461	0.00765924	244562	GCST90027574	5	158084494	0.0166525	5.25e-06	7738	0.00267421	7738	1.19144e-07	244562	TRUE	8.51023e-06	0.00287581	22.3115	42.2042	20.7432
rs1221558	T	G	T	G	-0.097888	0.00276518	0.805197	0.8221	90399314	0.796062	0.0106992	244562	GCST90027574	6	91109033	0.0208796	2.76e-06	7738	0.00283313	7738	2.73122e-07	244562	TRUE	4.92279e-06	0.00300598	23.3244	42.2042	21.9793
rs6504045	G	A	G	A	0.0847977	0.000195555	0.265218	0.2607	61477751	0.98244	0.00888484	244562	GCST90027574	17	59555112	0.0181586	3.01e-06	7738	0.00281102	7738	1.98086e-09	244562	TRUE	4.40312e-06	0.00280259	21.7418	42.2042	21.8074
rs734738	T	C	T	C	0.0769765	0.0157336	0.544809	0.5644	134247783	0.0490208	0.00799305	244562	GCST90027574	6	134568921	0.0172771	8.37e-06	7738	0.00255944	7738	1.58431e-05	244562	TRUE	5.35061e-05	0.0029389	22.8023	42.2042	19.8506
rs75967282	C	G	C	G	-0.191576	-0.00382876	0.0514132	0.07873	61443077	0.728479	0.0110291	244562	GCST90027574	17	59520438	0.0375793	3.43e-07	7738	0.0033482	7738	4.92774e-07	244562	TRUE	7.22402e-07	0.00357984	27.7932	42.2042	25.9887
rs7798564	T	C	T	C	-0.0977785	-0.00912621	0.825171	0.816	21925455	0.306311	0.00892109	244562	GCST90027574	7	21965073	0.0211209	3.67e-06	7738	0.00276276	7738	4.27916e-06	244562	TRUE	1.20639e-05	0.00275851	21.3988	42.2042	21.432
rs7989040	A	G	A	G	-0.14697	-0.00471032	0.0848581	0.08282	103748918	0.721544	0.0132165	244562	GCST90027574	13	104401268	0.0303512	1.28e-06	7738	0.00302186	7738	5.19374e-07	244562	TRUE	2.57135e-06	0.00335482	26.0402	42.2042	23.448
rs1006589	C	T	C	T	0.153638	0.0109188	0.407314	0.4867	79267051	0.158695	0.00774672	244562	GCST90027575	17	77263133	0.0337613	5.35e-06	7738	0.00266982	7738	8.12316e-06	244562	TRUE	2.32311e-05	0.0113968	89.1817	42.2042	20.709
rs11693339	C	T	C	T	-0.1592	-0.00544362	0.296342	0.2607	60003600	0.497493	0.00802374	244562	GCST90027575	2	60230735	0.0343571	3.59e-06	7738	0.00276779	7738	1.88207e-06	244562	TRUE	8.95805e-06	0.0105699	82.6423	42.2042	21.471
rs11849839	C	T	C	T	-0.237573	-0.0130721	0.258696		105825180	0.170219	0.00953124	244562	GCST90027575	14	106291513	0.0508739	3.01e-06	7738	0.00281103	7738	7.69136e-06	244562	TRUE	1.33006e-05	0.0216476	171.171	42.2042	21.8074
rs12218078	A	C	A	C	-0.230734	0.0105722	0.104227	0.08282	120639424	0.370542	0.0118065	244562	GCST90027575	10	122398936	0.0509749	6e-06	7738	0.00264147	7738	3.27872e-06	244562	TRUE	1.72772e-05	0.00994103	77.676	42.2042	20.4885
rs73883495	T	A	T	A	-0.22072	-0.0199997	0.112841	0.1104	180071953	0.0904899	0.0118144	244562	GCST90027575	3	179789741	0.049573	8.49e-06	7738	0.00255602	7738	1.17174e-05	244562	TRUE	4.40614e-05	0.00975398	76.2	42.2042	19.8241
rs78044740	G	A	G	A	0.312579	-0.020479	0.0565355	0.0317	32610398	0.322094	0.0206824	244562	GCST90027575	17	30937416	0.0672004	3.3e-06	7738	0.00278899	7738	4.00892e-06	244562	TRUE	1.06378e-05	0.0104231	81.4823	42.2042	21.6359
rs10146289	A	G	A	G	0.082696	0.00327074	0.413617	0.4233	32472316	0.689992	0.0082001	244562	GCST90027576	14	32941522	0.0186892	9.65e-06	7738	0.00252449	7738	6.50531e-07	244562	TRUE	1.83161e-05	0.00331725	25.7477	42.2042	19.5789
rs117882621	G	C	G	C	-0.178562	-0.0189164	0.0745627	0.1012	133545249	0.101798	0.0115612	244562	GCST90027576	9	136410371	0.0392434	5.36e-06	7738	0.00266912	7738	1.09467e-05	244562	TRUE	2.77671e-05	0.00440024	34.1907	42.2042	20.7036
rs12511142	A	C	A	C	0.0797793	0.000348563	0.532631	0.5235	184258222	0.96374	0.00766733	244562	GCST90027576	4	185179375	0.0179054	8.37e-06	7738	0.00255966	7738	8.45063e-09	244562	TRUE	1.20518e-05	0.00316881	24.5919	42.2042	19.8524
rs142578694	T	C	T	C	-0.116457	-0.00993874	0.170457	0.1748	12756956	0.382981	0.0113922	244562	GCST90027576	19	12867770	0.0249979	3.18e-06	7738	0.00279763	7738	3.11216e-06	244562	TRUE	9.35771e-06	0.00383544	29.7852	42.2042	21.7032
rs17033379	C	G	C	G	-0.120386	0.00898902	0.144102	0.1299	45284595	0.351018	0.0096385	244562	GCST90027576	2	45511734	0.0256997	2.81e-06	7738	0.00282846	7738	3.55647e-06	244562	TRUE	8.74044e-06	0.00357498	27.7553	42.2042	21.943
rs2903400	T	G	T	G	-0.106115	-0.0186239	0.210115	0.2096	70805686	0.0626167	0.0100026	244562	GCST90027576	7	70270672	0.0230007	3.96e-06	7738	0.00274386	7738	1.4175e-05	244562	TRUE	2.51001e-05	0.0037377	29.0233	42.2042	21.2849
rs34824853	A	G	A	G	-0.188816	-0.033567	0.0632517	0.07157	18316428	0.016323	0.0139769	244562	GCST90027576	17	18219742	0.0426358	9.49e-06	7738	0.00252879	7738	2.35836e-05	244562	TRUE	8.23244e-05	0.00422477	32.8215	42.2042	19.6123
rs61406022	A	G	A	G	0.101809	0.00723416	0.23517	0.2331	178770893	0.39103	0.00843387	244562	GCST90027576	5	178197894	0.0220395	3.85e-06	7738	0.00275078	7738	3.0084e-06	244562	TRUE	1.10542e-05	0.00372863	28.9526	42.2042	21.3387
rs6730157	G	A	G	A	-0.0966221	0.00892093	0.268673		135149518	0.25648	0.00786158	244562	GCST90027576	2	135907088	0.0203381	2.03e-06	7738	0.00290905	7738	5.26517e-06	244562	TRUE	7.60061e-06	0.00366875	28.486	42.2042	22.57
rs11686319	A	G	A	G	0.187164	-0.00921598	0.194749	0.2106	176756791	0.311379	0.00910371	244562	GCST90027577	2	177621519	0.0402541	3.33e-06	7738	0.00278674	7738	4.19044e-06	244562	TRUE	1.09226e-05	0.0109871	85.9401	42.2042	21.6184
rs1419253	G	A	G	A	0.152911	0.00553186	0.371009	0.3753	19892750	0.478107	0.00779849	244562	GCST90027577	9	19892748	0.0336211	5.41e-06	7738	0.00266672	7738	2.05748e-06	244562	TRUE	1.35321e-05	0.0109128	85.3529	42.2042	20.6849
rs142500830	A	G	A	G	-0.322874	0.0183851	0.0514504	0.03579	90366574	0.429468	0.0232693	244562	GCST90027577	9	93128856	0.0706945	4.94e-06	7738	0.00268911	7738	2.55258e-06	244562	TRUE	1.32483e-05	0.0101752	79.5249	42.2042	20.8591
rs148303468	T	C	T	C	0.177441	-0.0154443	0.200859	0.1973	5098252	0.138139	0.0104159	244562	GCST90027577	17	5001547	0.0387795	4.75e-06	7738	0.00269906	7738	8.98981e-06	244562	TRUE	2.20545e-05	0.0101077	78.9916	42.2042	20.9365
rs1784430	T	C	T	C	-0.149956	0.00770194	0.606237	0.5665	102604082	0.317456	0.00770426	244562	GCST90027577	11	102474813	0.0327002	4.52e-06	7738	0.00271101	7738	4.0865e-06	244562	TRUE	1.44073e-05	0.0107358	83.9536	42.2042	21.0294
rs2507904	C	T	C	T	-0.13966	0.00494316	0.530025	0.4826	115130890	0.52235	0.00772698	244562	GCST90027577	11	115001610	0.0312578	7.9e-06	7738	0.0025739	7738	1.67341e-06	244562	TRUE	1.8291e-05	0.00971729	75.9106	42.2042	19.9631
rs3861491	G	A	G	A	-0.171693	0.00858944	0.66192	0.6339	49973756	0.299528	0.00827941	244562	GCST90027577	14	50440474	0.0348592	8.42e-07	7738	0.00312604	7738	4.40092e-06	244562	TRUE	3.09005e-06	0.0131935	103.43	42.2042	24.2589
rs4648487	C	T	C	T	-0.145884	0.00178342	0.387593	0.4264	3368740	0.816728	0.00769527	244562	GCST90027577	1	3285304	0.0316974	4.18e-06	7738	0.00273064	7738	2.19621e-07	244562	TRUE	7.17742e-06	0.0101033	78.9565	42.2042	21.1821
rs7322087	T	G	T	G	-0.254636	0.0130296	0.0967722	0.091	22215382	0.375369	0.0146984	244562	GCST90027577	13	22789521	0.056934	7.73e-06	7738	0.00257904	7738	3.21316e-06	244562	TRUE	2.17633e-05	0.0113349	88.6921	42.2042	20.003
rs77859481	T	C	T	C	0.249398	0.0039413	0.0999669	0.1452	101235707	0.772955	0.0136608	244562	GCST90027577	13	101888058	0.0546238	4.98e-06	7738	0.00268743	7738	3.40362e-07	244562	TRUE	8.89692e-06	0.0111926	87.566	42.2042	20.846
rs996426	C	A	C	A	0.167575	-0.0105877	0.278287	0.2536	189576765	0.220933	0.00864972	244562	GCST90027577	2	190441491	0.0349441	1.62e-06	7738	0.00296391	7738	6.12648e-06	244562	TRUE	6.65404e-06	0.0112799	88.257	42.2042	22.997
rs9994112	A	G	A	G	0.180107	-0.0190599	0.197016	0.2342	84364043	0.0412401	0.00933802	244562	GCST90027577	4	85285196	0.0403597	8.1e-06	7738	0.00256763	7738	1.70349e-05	244562	TRUE	5.48236e-05	0.0102636	80.2226	42.2042	19.9143
rs10026887	T	C	T	C	-0.0774366	-0.000640515	0.309497	0.2822	62232217	0.939793	0.00848027	244562	GCST90027578	4	63097935	0.0175062	9.72e-06	7738	0.00252287	7738	2.33267e-08	244562	TRUE	1.42673e-05	0.00256298	19.8781	42.2042	19.5663
rs115981692	A	G	A	G	0.168762	0.0100304	0.052016	0.02556	215995646	0.549924	0.0167768	244562	GCST90027578	1	216168988	0.0360659	2.88e-06	7738	0.00282236	7738	1.46162e-06	244562	TRUE	6.80091e-06	0.00280878	21.7899	42.2042	21.8955
rs12035670	T	C	T	C	0.081705	-0.00167532	0.332632	0.3763	52066962	0.832368	0.00791494	244562	GCST90027578	1	52532634	0.0176762	3.79e-06	7738	0.00275426	7738	1.83195e-07	244562	TRUE	6.43828e-06	0.00296385	22.9965	42.2042	21.3658
rs12623606	G	A	G	A	-0.0734709	-0.000250986	0.53817	0.5327	6620503	0.973979	0.00769464	244562	GCST90027578	2	6760635	0.0162693	6.3e-06	7738	0.00262926	7738	4.35047e-09	244562	TRUE	9.0711e-06	0.00268326	20.8135	42.2042	20.3936
rs12976953	T	C	T	C	0.134427	0.0171465	0.0983496	0.09816	52276207	0.167302	0.0124167	244562	GCST90027578	19	52779460	0.0281616	1.81e-06	7738	0.00293673	7738	7.79743e-06	244562	TRUE	8.37875e-06	0.00320489	24.8728	42.2042	22.7855
rs2168031	A	G	A	G	0.127102	-0.004802	0.133681	0.1186	176338340	0.639857	0.0102629	244562	GCST90027578	4	177259491	0.0252894	5.01e-07	7738	0.00325458	7738	8.95196e-07	244562	TRUE	1.15432e-06	0.00374181	29.0554	42.2042	25.2597
rs34566098	G	A	G	A	0.176661	-0.0146843	0.0538268	0.06442	125172088	0.440223	0.0190256	244562	GCST90027578	10	126860657	0.0381057	3.55e-06	7738	0.00277064	7738	2.4358e-06	244562	TRUE	9.5593e-06	0.00317893	24.6706	42.2042	21.4932
rs35778179	T	C	T	C	-0.139098	-0.00232966	0.0884996	0.07362	92369629	0.89217	0.0171856	244562	GCST90027578	14	92835973	0.0312106	8.32e-06	7738	0.00256099	7738	7.51399e-08	244562	TRUE	1.28873e-05	0.00312155	24.2239	42.2042	19.8627
rs73334581	T	C	T	C	0.0925024	-0.00214711	0.184125	0.1605	61481318	0.836378	0.0103962	244562	GCST90027578	17	59558679	0.0207821	8.54e-06	7738	0.00255446	7738	1.74411e-07	244562	TRUE	1.39921e-05	0.00257082	19.9392	42.2042	19.8119
rs79017683	T	C	T	C	-0.174312	0.0116349	0.0665022	0.07669	77938577	0.443077	0.0151692	244562	GCST90027578	16	77972474	0.0382226	5.11e-06	7738	0.00268122	7738	2.40554e-06	244562	TRUE	1.34048e-05	0.00377254	29.2949	42.2042	20.7976
rs7998195	C	T	C	T	0.0992887	0.01858	0.157971	0.135	54524881	0.0660222	0.0101073	244562	GCST90027578	13	55099016	0.0221857	7.63e-06	7738	0.00258234	7738	1.38175e-05	244562	TRUE	4.46207e-05	0.00262261	20.3419	42.2042	20.0287
rs10801008	T	C	T	C	-0.0989151	-0.0111255	0.204592	0.2014	191026141	0.223413	0.00913797	244562	GCST90027579	1	190995271	0.0204746	1.36e-06	7738	0.00300794	7738	6.06111e-06	244562	TRUE	5.60935e-06	0.00318445	24.7136	42.2042	23.3396
rs12201310	A	C	A	C	-0.120363	0.0028033	0.129567	0.1544	10213410	0.787153	0.0103822	244562	GCST90027579	6	10213643	0.0246445	1.04e-06	7738	0.00307392	7738	2.98107e-07	244562	TRUE	1.95072e-06	0.00326773	25.362	42.2042	23.8532
rs12336386	A	G	A	G	-0.110372	-0.000763271	0.148984	0.1278	115361795	0.939401	0.01004	244562	GCST90027579	9	118124074	0.0230925	1.76e-06	7738	0.00294428	7738	2.36321e-08	244562	TRUE	2.7348e-06	0.00308905	23.971	42.2042	22.8442
rs12877628	A	G	A	G	-0.147379	0.00963093	0.117642	0.1411	109688144	0.460122	0.0130386	244562	GCST90027579	13	110340491	0.0328665	7.32e-06	7738	0.00259251	7738	2.23093e-06	244562	TRUE	1.84086e-05	0.00450929	35.0419	42.2042	20.1078
rs13205108	T	C	T	C	0.140698	-0.0138516	0.0754677	0.09611	36932627	0.358433	0.0150831	244562	GCST90027579	6	36900403	0.0315456	8.19e-06	7738	0.00256488	7738	3.44853e-06	244562	TRUE	2.35485e-05	0.00276242	21.4292	42.2042	19.8929
rs132685	C	G	C	G	0.0872357	0.0126981	0.291621	0.3252	36180183	0.121881	0.0082086	244562	GCST90027579	22	36576231	0.0188637	3.75e-06	7738	0.00275689	7738	9.78475e-06	244562	TRUE	1.87032e-05	0.00314415	24.3998	42.2042	21.3863
rs2137304	A	G	A	G	-0.156047	0.0229675	0.0902271	0.1258	23557727	0.0319286	0.0107059	244562	GCST90027579	8	23415240	0.028477	4.26e-08	7738	0.00386655	7738	1.88184e-05	244562	TRUE	5.28584e-07	0.00399771	31.0504	42.2042	30.0277
rs2768981	G	C	G	C	0.0847845	-0.0104127	0.285092	0.2812	6928824	0.21579	0.00841226	244562	GCST90027579	6	6929057	0.0189508	7.68e-06	7738	0.00258071	7738	6.26489e-06	244562	TRUE	2.84044e-05	0.00293021	22.7347	42.2042	20.016
rs2895633	A	C	A	C	-0.0828222	0.0238591	0.416051	0.3885	145206960	0.00375898	0.00823378	244562	GCST90027579	5	144586523	0.0167918	8.13e-07	7738	0.00313487	7738	3.43328e-05	244562	TRUE	1.38723e-05	0.00333307	25.8709	42.2042	24.3276
rs396769	C	T	C	T	0.0928377	-0.010326	0.22785	0.2035	165886864	0.404979	0.0123997	244562	GCST90027579	5	165313869	0.0202644	4.62e-06	7738	0.00270575	7738	2.83567e-06	244562	TRUE	1.28642e-05	0.0030327	23.5323	42.2042	20.9885
rs4551833	G	T	G	T	-0.169028	-0.00458384	0.054037	0.06237	42710551	0.786522	0.0169252	244562	GCST90027579	12	43104353	0.0363326	3.28e-06	7738	0.00278994	7738	2.99921e-07	244562	TRUE	5.88388e-06	0.00292087	22.6621	42.2042	21.6433
rs4870408	C	T	C	T	0.137155	0.0228398	0.0829161	0.09509	155969191	0.129716	0.0150736	244562	GCST90027579	6	156290325	0.0301954	5.57e-06	7738	0.00265992	7738	9.38779e-06	244562	TRUE	2.61668e-05	0.00286089	22.1953	42.2042	20.632
rs61828192	G	C	G	C	0.109316	-0.0161966	0.141527	0.1524	8839754	0.0877991	0.00948766	244562	GCST90027579	10	8881717	0.0242723	6.68e-06	7738	0.00261512	7738	1.19162e-05	244562	TRUE	3.58017e-05	0.00290378	22.529	42.2042	20.2836
rs7527876	C	T	C	T	-0.100104	0.0297222	0.177998	0.1452	242765300	0.00378861	0.0102659	244562	GCST90027579	1	242928602	0.0214414	3.03e-06	7738	0.00280969	7738	3.42745e-05	244562	TRUE	4.36603e-05	0.00293238	22.7516	42.2042	21.797
rs28433201	C	A	C	A	0.30954	0.0128643	0.103038	0.06748	21131970	0.483533	0.018361	244562	GCST90027580	7	21171589	0.0625379	7.43e-07	7738	0.00315687	7738	2.00721e-06	244562	TRUE	2.05832e-06	0.0177107	139.48	42.2042	24.4989
rs3861977	T	A	T	A	0.27831	-0.00992451	0.123317	0.1421	157382616	0.327534	0.0101364	244562	GCST90027580	6	157803648	0.0616502	6.35e-06	7738	0.00262742	7738	3.91977e-06	244562	TRUE	1.94661e-05	0.0167476	131.766	42.2042	20.3793
rs610790	T	C	T	C	-0.194498	0.000840859	0.306114	0.3139	86497602	0.914518	0.00783349	244562	GCST90027580	11	86208644	0.0416848	3.07e-06	7738	0.00280632	7738	4.71141e-08	244562	TRUE	4.8172e-06	0.0160706	126.353	42.2042	21.7708
rs2972921	C	T	C	T	0.0737138	0.0124082	0.506555	0.5378	18195442	0.107039	0.00769908	244562	GCST90027581	5	18195551	0.0161151	4.78e-06	7738	0.00269738	7738	1.06206e-05	244562	TRUE	2.45355e-05	0.0027164	21.0713	42.2042	20.9234
rs3785822	A	G	A	G	0.0988308	-0.00294023	0.178252	0.1595	61479562	0.7837	0.0107112	244562	GCST90027581	17	59556923	0.0211211	2.88e-06	7738	0.00282233	7738	3.08106e-07	244562	TRUE	5.20316e-06	0.00286146	22.1998	42.2042	21.8953
rs5756419	A	T	A	T	0.0798299	0.0140668	0.29333	0.3119	36950253	0.0877183	0.00823796	244562	GCST90027581	22	37346295	0.0178543	7.78e-06	7738	0.00257756	7738	1.19223e-05	244562	TRUE	4.1146e-05	0.00264201	20.4927	42.2042	19.9915
rs61798216	G	A	G	A	-0.122536	0.00617258	0.113463	0.1115	36457429	0.693367	0.0156549	244562	GCST90027581	4	36459051	0.0264795	3.7e-06	7738	0.00276052	7738	6.3569e-07	244562	TRUE	7.30311e-06	0.00302071	23.439	42.2042	21.4145
rs6705904	G	T	G	T	0.0795887	0.00830469	0.607331	0.5521	65542897	0.284889	0.00776574	244562	GCST90027581	2	65770031	0.0165053	1.42e-06	7738	0.00299665	7738	4.67621e-06	244562	TRUE	5.17449e-06	0.00302124	23.4431	42.2042	23.2518
rs73035953	A	G	A	G	-0.0971018	-0.00300861	0.182607	0.1738	9599574	0.755129	0.00964658	244562	GCST90027581	5	9599686	0.02114	4.36e-06	7738	0.00271985	7738	3.9774e-07	244562	TRUE	7.99347e-06	0.00281471	21.836	42.2042	21.0982
rs74949229	A	G	A	G	-0.136508	0.0206607	0.0937926	0.06442	9484983	0.188133	0.0156982	244562	GCST90027581	10	9526946	0.0284225	1.56e-06	7738	0.00297291	7738	7.08278e-06	244562	TRUE	6.94008e-06	0.00316769	24.5831	42.2042	23.067
rs10408553	A	G	A	G	0.0997311	-0.013038	0.205165	0.227	52937808	0.156482	0.00920111	244562	GCST90027582	19	53441061	0.0213437	2.97e-06	7738	0.00281437	7738	8.21018e-06	244562	TRUE	1.36219e-05	0.00324393	25.1767	42.2042	21.8334
rs16824588	C	T	C	T	-0.0758233	0.0115444	0.41912	0.4294	1968793	0.14494	0.00791993	244562	GCST90027582	1	1900232	0.0167556	6.03e-06	7738	0.0026401	7738	8.68782e-06	244562	TRUE	2.69443e-05	0.00279937	21.7167	42.2042	20.4779
rs17110951	C	G	C	G	-0.169484	-0.0149364	0.0679397	0.05521	150148855	0.461634	0.0202896	244562	GCST90027582	5	149528418	0.0369058	4.38e-06	7738	0.00271875	7738	2.21593e-06	244562	TRUE	1.13271e-05	0.00363794	28.2458	42.2042	21.0896
rs17164872	T	G	T	G	-0.0847983	0.0161842	0.346663	0.316	130369512	0.0499045	0.00825395	244562	GCST90027582	7	130009353	0.0178449	2.01e-06	7738	0.00291047	7738	1.57205e-05	244562	TRUE	1.47324e-05	0.00325723	25.2803	42.2042	22.5811
rs2838700	T	C	T	C	0.128519	0.0102425	0.103103	0.1339	44815998	0.280645	0.00949372	244562	GCST90027582	21	46235913	0.0283814	5.95e-06	7738	0.00264363	7738	4.7594e-06	244562	TRUE	1.97972e-05	0.00305477	23.7041	42.2042	20.5053
rs3936142	A	G	A	G	0.0830346	0.0183659	0.702293	0.6738	133713731	0.0456709	0.0091902	244562	GCST90027582	2	134471302	0.0184747	6.97e-06	7738	0.00260444	7738	1.63298e-05	244562	TRUE	4.64223e-05	0.00288307	22.3679	42.2042	20.2006
rs60960031	A	G	A	G	-0.0818261	-0.00279305	0.400586	0.4008	21307787	0.719825	0.00778675	244562	GCST90027582	2	21530659	0.0169698	1.42e-06	7738	0.00299647	7738	5.26089e-07	244562	TRUE	2.84246e-06	0.00321541	24.9547	42.2042	23.2504
rs72775871	A	G	A	G	-0.143865	0.00177418	0.0768355	0.1022	11935810	0.898011	0.0138419	244562	GCST90027582	2	12075936	0.0322042	7.92e-06	7738	0.00257306	7738	6.71764e-08	244562	TRUE	1.22189e-05	0.00293617	22.7811	42.2042	19.9565
rs936232	A	G	A	G	-0.0793088	-0.00557532	0.354711	0.3436	25811448	0.489897	0.00807464	244562	GCST90027582	4	25813070	0.0173543	4.88e-06	7738	0.00269241	7738	1.94943e-06	244562	TRUE	1.20784e-05	0.0028794	22.3393	42.2042	20.8847
rs9428065	T	C	T	C	0.0918662	-0.0159996	0.794241	0.7955	88365891	0.116416	0.0101909	244562	GCST90027582	1	88831574	0.0207423	9.47e-06	7738	0.00252919	7738	1.00788e-05	244562	TRUE	4.43648e-05	0.00275837	21.3978	42.2042	19.6154
rs113333050	T	C	T	C	-0.146766	-0.00644234	0.0707679	0.07464	136732623	0.722168	0.0181187	244562	GCST90027583	7	136417370	0.0322778	5.44e-06	7738	0.00266543	7738	5.16948e-07	244562	TRUE	1.02334e-05	0.00283297	21.9781	42.2042	20.6749
rs1719290	T	C	T	C	-0.0762109	0.0184674	0.389749	0.4642	64840037	0.017684	0.00778503	244562	GCST90027583	15	65132236	0.0165576	4.17e-06	7738	0.00273109	7738	2.30089e-05	244562	TRUE	3.88939e-05	0.00276285	21.4326	42.2042	21.1855
rs2381195	C	T	C	T	0.0731366	-0.0247455	0.475705	0.5593	5145887	0.00144168	0.00776653	244562	GCST90027583	9	5145887	0.0162834	7.07e-06	7738	0.00260095	7738	4.15083e-05	244562	TRUE	0.000112459	0.00266817	20.6962	42.2042	20.1734
rs2620049	A	G	A	G	-0.131349	0.00753865	0.0844744	0.1002	73842975	0.648612	0.0165433	244562	GCST90027583	17	71839114	0.0295233	8.63e-06	7738	0.0025521	7738	8.49094e-07	244562	TRUE	1.72094e-05	0.00266857	20.6993	42.2042	19.7936
rs62335957	G	T	G	T	-0.152282	-0.00765575	0.0738816	0.08384	1651083	0.631165	0.0159466	244562	GCST90027583	5	1651198	0.0310489	9.36e-07	7738	0.00309984	7738	9.42444e-07	244562	TRUE	2.11677e-06	0.00317344	24.6279	42.2042	24.055
rs9630400	G	C	G	C	-0.0786746	0.00632674	0.326503	0.3364	70662492	0.496358	0.00930087	244562	GCST90027583	14	71129209	0.0173119	5.51e-06	7738	0.0026626	7738	1.89203e-06	244562	TRUE	1.34319e-05	0.00272221	21.1165	42.2042	20.6528
rs9681001	T	C	T	C	-0.100325	0.0235077	0.1627	0.1861	130000880	0.0273414	0.0106533	244562	GCST90027583	3	129719723	0.0222674	6.62e-06	7738	0.00261713	7738	1.99093e-05	244562	TRUE	5.18182e-05	0.00274231	21.2729	42.2042	20.2992
rs10161329	A	G	A	G	-0.141329	-0.00132712	0.130885	0.1104	41302320	0.898065	0.0103595	244562	GCST90027584	12	41696122	0.0316806	8.16e-06	7738	0.00256592	7738	6.71049e-08	244562	TRUE	1.25651e-05	0.00454422	35.3146	42.2042	19.901
rs11136990	G	A	G	A	-0.130281	-0.0113168	0.176978	0.1554	6240812	0.280964	0.0104964	244562	GCST90027584	8	6098333	0.0284056	4.51e-06	7738	0.0027118	7738	4.75309e-06	244562	TRUE	1.52889e-05	0.00494451	38.4408	42.2042	21.0356
rs12208192	C	G	C	G	0.115602	-0.00641322	0.253754	0.2127	14871320	0.498941	0.00948481	244562	GCST90027584	6	14871551	0.0248543	3.3e-06	7738	0.00278868	7738	1.86943e-06	244562	TRUE	8.25303e-06	0.00506122	39.3528	42.2042	21.6335
rs12591343	G	C	G	C	-0.11752	0.00527754	0.200701	0.2025	29594917	0.548761	0.00880151	244562	GCST90027584	15	29887121	0.0265516	9.6e-06	7738	0.00252596	7738	1.47015e-06	244562	TRUE	2.13187e-05	0.00443111	34.4316	42.2042	19.5903
rs12681707	T	C	T	C	0.137286	-0.00220934	0.143991	0.1186	74139001	0.86093	0.0126111	244562	GCST90027584	8	75051236	0.0302121	5.52e-06	7738	0.00266205	7738	1.25498e-07	244562	TRUE	8.95745e-06	0.00464618	36.1106	42.2042	20.6486
rs17860736	A	G	A	G	0.227408	0.0352054	0.0534558	0.03579	170306820	0.0534811	0.0182315	244562	GCST90027584	6	170615908	0.0514809	9.99e-06	7738	0.00251599	7738	1.52468e-05	244562	TRUE	6.10109e-05	0.00523332	40.6979	42.2042	19.5128
rs1810574	T	C	T	C	0.247719	-0.0250423	0.943723	0.94785	1891586	0.279934	0.0231773	244562	GCST90027584	20	1872232	0.0550425	6.78e-06	7738	0.00261138	7738	4.77349e-06	244562	TRUE	2.23944e-05	0.00651815	50.7552	42.2042	20.2545
rs181499	T	G	T	G	0.103319	-0.00142705	0.391915	0.3589	117423913	0.857916	0.00797112	244562	GCST90027584	10	119183424	0.0229898	6.99e-06	7738	0.002604	7738	1.31055e-07	244562	TRUE	1.12758e-05	0.00508799	39.562	42.2042	20.1971
rs34466545	A	G	A	G	-0.103939	0.00845762	0.364594	0.3384	43450947	0.297329	0.00811533	244562	GCST90027584	20	42079587	0.0231795	7.32e-06	7738	0.00259242	7738	4.44116e-06	244562	TRUE	2.33544e-05	0.0050055	38.9174	42.2042	20.1071
rs56059900	A	G	A	G	0.192896	0.0227869	0.0664638	0.06339	49873142	0.353328	0.0245508	244562	GCST90027584	8	50785702	0.0432582	8.23e-06	7738	0.00256377	7738	3.52251e-06	244562	TRUE	2.38293e-05	0.00461735	35.8855	42.2042	19.8843
rs61992534	A	G	A	G	-0.144107	-0.00048712	0.150825	0.137	102255102	0.972563	0.014163	244562	GCST90027584	14	102721439	0.03166	5.32e-06	7738	0.00267098	7738	4.83703e-09	244562	TRUE	7.71016e-06	0.0053195	41.3717	42.2042	20.718
rs72697193	T	C	T	C	0.163585	-0.0268323	0.115289	0.1258	160511772	0.0516179	0.0137863	244562	GCST90027584	4	161432924	0.0341381	1.65e-06	7738	0.00295941	7738	1.54893e-05	244562	TRUE	1.21763e-05	0.00545891	42.462	42.2042	22.9619
rs72958820	T	C	T	C	0.223922	0.00104998	0.0539994	0.06953	74583629	0.947999	0.0160991	244562	GCST90027584	6	75293345	0.0481355	3.29e-06	7738	0.00278954	7738	1.7393e-08	244562	TRUE	4.96655e-06	0.00512276	39.8337	42.2042	21.6403
rs7859760	G	T	G	T	0.0942974	-0.00151182	0.517574	0.5389	115363462	0.845557	0.00776126	244562	GCST90027584	9	118125741	0.0212328	8.95e-06	7738	0.00254309	7738	1.55149e-07	244562	TRUE	1.44924e-05	0.00444051	34.505	42.2042	19.7235
rs12149972	G	C	G	C	-0.138469	0.00805292	0.083861	0.06033	60735695	0.541102	0.0131767	244562	GCST90027585	17	58813056	0.0306972	6.46e-06	7738	0.00262331	7738	1.52723e-06	244562	TRUE	1.47844e-05	0.00294616	22.8588	42.2042	20.3473
rs13388077	T	C	T	C	0.124899	-0.00592566	0.120233	0.1605	123610413	0.652998	0.0131798	244562	GCST90027585	2	124367989	0.025869	1.38e-06	7738	0.00300425	7738	8.2655e-07	244562	TRUE	2.9809e-06	0.00330019	25.6148	42.2042	23.3109
rs17761209	G	C	G	C	-0.112449	-0.0127867	0.123577	0.1176	2808959	0.28997	0.0120836	244562	GCST90027585	8	2666481	0.0254194	9.7e-06	7738	0.00252329	7738	4.57865e-06	244562	TRUE	3.07275e-05	0.002739	21.2471	42.2042	19.5695
rs1873661	T	G	T	G	-0.0787015	0.00167353	0.483485	0.5419	99014085	0.8279	0.00769808	244562	GCST90027585	14	99480422	0.0172679	5.17e-06	7738	0.00267797	7738	1.93249e-07	244562	TRUE	8.71161e-06	0.00309358	24.0062	42.2042	20.7724
rs5996309	G	A	G	A	-0.0814187	-0.00460044	0.558541	0.5143	43318710	0.551966	0.00773422	244562	GCST90027585	22	43714716	0.017727	4.37e-06	7738	0.00271944	7738	1.44671e-06	244562	TRUE	1.0079e-05	0.00326907	25.3724	42.2042	21.0949
rs739677	A	G	A	G	-0.0948002	-0.000965561	0.784264	0.726	2452750	0.913629	0.00890227	244562	GCST90027585	11	2473980	0.0202008	2.69e-06	7738	0.00283877	7738	4.8103e-08	244562	TRUE	4.24697e-06	0.00304112	23.5979	42.2042	22.0232
rs11079051	C	A	C	A	-0.0755773	-0.0163859	0.590187	0.5061	42694113	0.0330027	0.00768551	244562	GCST90027586	17	40846131	0.0165077	4.69e-06	7738	0.0027022	7738	1.85867e-05	244562	TRUE	3.59713e-05	0.00276305	21.4341	42.2042	20.9609
rs111907772	G	C	G	C	-0.141105	0.00393526	0.0799669	0.04499	67741652	0.855231	0.0215692	244562	GCST90027586	2	67968784	0.0314615	7.29e-06	7738	0.00259347	7738	1.36111e-07	244562	TRUE	1.17824e-05	0.00292974	22.731	42.2042	20.1153
rs12921427	C	A	C	A	-0.124305	0.001393	0.896573	0.8691	13783938	0.914313	0.0129461	244562	GCST90027586	16	13877795	0.0272809	5.2e-06	7738	0.00267657	7738	4.73412e-08	244562	TRUE	8.00842e-06	0.00286567	22.2326	42.2042	20.7616
rs13396356	T	A	T	A	0.150242	0.0126256	0.0637442	0.05112	43893043	0.46242	0.0171808	244562	GCST90027586	2	44120182	0.0339083	9.39e-06	7738	0.00253136	7738	2.20817e-06	244562	TRUE	2.3205e-05	0.00269431	20.8995	42.2042	19.6323
rs17129454	C	G	C	G	-0.161589	-0.0143287	0.0582692	0.07566	111996792	0.444994	0.0187601	244562	GCST90027586	10	113756550	0.0343715	2.59e-06	7738	0.00284886	7738	2.38538e-06	244562	TRUE	7.04298e-06	0.00286563	22.2322	42.2042	22.1017
rs271787	C	T	C	T	0.141461	-0.00167123	0.100812	0.1227	33410664	0.878255	0.0109101	244562	GCST90027586	5	33410770	0.0267929	1.29e-07	7738	0.0035905	7738	9.59463e-08	244562	TRUE	2.3667e-07	0.00362799	28.1683	42.2042	27.8762
rs75292198	T	C	T	C	0.134426	0.00980092	0.101679	0.1012	6771464	0.45836	0.0132168	244562	GCST90027586	10	6813426	0.0291059	3.87e-06	7738	0.00274974	7738	2.24851e-06	244562	TRUE	1.01038e-05	0.00330111	25.6219	42.2042	21.3307
rs77117941	G	T	G	T	0.143427	-0.0363484	0.0818668	0.06851	69106617	0.0354715	0.0172846	244562	GCST90027586	12	69500397	0.0295413	1.2e-06	7738	0.00303784	7738	1.80825e-05	244562	TRUE	1.03762e-05	0.00309247	23.9976	42.2042	23.5723
rs78718945	A	G	A	G	-0.157783	0.0162235	0.063472	0.06033	15666416	0.317901	0.0162433	244562	GCST90027586	9	15666414	0.0345974	5.1e-06	7738	0.00268133	7738	4.07899e-06	244562	TRUE	1.61121e-05	0.00295974	22.9645	42.2042	20.7986
rs8001568	C	T	C	T	0.12943	0.0123845	0.0931111	0.07464	21866390	0.417205	0.0152654	244562	GCST90027586	13	22440529	0.0288084	7.03e-06	7738	0.00260246	7738	2.69125e-06	244562	TRUE	1.87633e-05	0.00282915	21.9484	42.2042	20.1851
rs10496240	G	A	G	A	-0.0961367	-0.00780845	0.205664	0.2239	80380545	0.36139	0.00855515	244562	GCST90027587	2	80607670	0.0200962	1.72e-06	7738	0.00294952	7738	3.40634e-06	244562	TRUE	5.42909e-06	0.00301975	23.4315	42.2042	22.885
rs10812126	C	T	C	T	-0.0764608	0.014216	0.528559	0.4908	2499251	0.0645402	0.00769085	244562	GCST90027587	9	2499251	0.0162214	2.43e-06	7738	0.00286378	7738	1.39706e-05	244562	TRUE	1.59901e-05	0.00291359	22.6054	42.2042	22.2178
rs13096036	G	A	G	A	-0.141659	0.0273797	0.075084	0.08998	113591081	0.148792	0.0189635	244562	GCST90027587	3	113309928	0.0306065	3.69e-06	7738	0.00276149	7738	8.52377e-06	244562	TRUE	1.69498e-05	0.0027872	21.622	42.2042	21.422
rs17601633	G	A	G	A	0.0772012	0.00760412	0.360364	0.3405	61477016	0.352658	0.00818135	244562	GCST90027587	17	59554377	0.0166346	3.47e-06	7738	0.00277651	7738	3.53233e-06	244562	TRUE	1.062e-05	0.00274759	21.3139	42.2042	21.5389
rs28380908	T	A	T	A	-0.116905	-0.00427208	0.14264	0.2198	31345869	0.706213	0.0113334	244562	GCST90027587	6	31313646	0.0230318	3.86e-07	7738	0.00331933	7738	5.80998e-07	244562	TRUE	8.29485e-07	0.00334273	25.9461	42.2042	25.7638
rs497388	C	T	C	T	-0.128934	-0.0093419	0.910358	0.90184	149357286	0.453631	0.0124662	244562	GCST90027587	6	149678422	0.028573	6.41e-06	7738	0.00262522	7738	2.29621e-06	244562	TRUE	1.63784e-05	0.00271324	21.0468	42.2042	20.3621
rs6022157	C	A	C	A	-0.0779399	-0.0183316	0.547714	0.4785	52915531	0.0178345	0.007738	244562	GCST90027587	20	51532070	0.016697	3.04e-06	7738	0.0028087	7738	2.29482e-05	244562	TRUE	2.93403e-05	0.00300965	23.353	42.2042	21.7893
rs6108110	T	C	T	C	-0.0980389	0.0114699	0.188376	0.229	8131752	0.22322	0.00941691	244562	GCST90027587	20	8112399	0.0211132	3.43e-06	7738	0.00277948	7738	6.06616e-06	244562	TRUE	1.3242e-05	0.00293905	22.8035	42.2042	21.562
rs67123329	A	G	A	G	0.0979587	-0.0190653	0.171098	0.1769	30800463	0.0467541	0.00958768	244562	GCST90027587	10	31089392	0.0217071	6.4e-06	7738	0.00262557	7738	1.61684e-05	244562	TRUE	4.26529e-05	0.00272185	21.1137	42.2042	20.3649
rs697368	C	T	C	T	-0.0870071	0.00402247	0.746264	0.7577	123456495	0.642679	0.00866993	244562	GCST90027587	10	125216011	0.0188301	3.83e-06	7738	0.00275227	7738	8.80174e-07	244562	TRUE	7.98313e-06	0.00286691	22.2422	42.2042	21.3503
rs71437543	C	T	C	T	0.164921	0.0504795	0.0715998	0.04192	36105841	0.0115197	0.0199798	244562	GCST90027587	2	36332984	0.0335498	8.85e-07	7738	0.00311387	7738	2.61006e-05	244562	TRUE	1.11e-05	0.003616	28.0749	42.2042	24.1642
rs74134622	C	G	C	G	-0.165647	-0.0199651	0.0756204	0.08691	50020900	0.278491	0.0184228	244562	GCST90027587	10	51780660	0.036634	6.14e-06	7738	0.00263594	7738	4.80223e-06	244562	TRUE	2.04592e-05	0.00383607	29.7901	42.2042	20.4455
rs78003847	A	G	A	G	-0.149041	-0.0189376	0.0602869	0.02658	1735780	0.453608	0.0252699	244562	GCST90027587	17	1639074	0.0337337	9.95e-06	7738	0.00251694	7738	2.29645e-06	244562	TRUE	2.48034e-05	0.00251686	19.5196	42.2042	19.5202
rs1027949	G	A	G	A	0.143992	0.0191331	0.145409	0.1769	109993163	0.0986279	0.011585	244562	GCST90027588	12	110430968	0.0284523	4.17e-07	7738	0.00329982	7738	1.11529e-05	244562	TRUE	2.7268e-06	0.00515295	40.0697	42.2042	25.6119
rs10815601	A	T	A	T	-0.110624	0.0120441	0.243727	0.2648	7351774	0.162507	0.00862332	244562	GCST90027588	9	7351774	0.0235147	2.55e-06	7738	0.00285274	7738	7.97647e-06	244562	TRUE	1.16133e-05	0.0045114	35.0583	42.2042	22.132
rs1573442	A	G	A	G	-0.102007	0.00626339	0.362316	0.3579	18306443	0.422819	0.00781419	244562	GCST90027588	21	19678760	0.0218574	3.06e-06	7738	0.00280754	7738	2.62702e-06	244562	TRUE	8.50592e-06	0.00480821	37.376	42.2042	21.7803
rs17155574	T	C	T	C	0.142716	-0.00836551	0.132159	0.138	81847920	0.39764	0.00989014	244562	GCST90027588	7	81477236	0.0295391	1.36e-06	7738	0.00300833	7738	2.92546e-06	244562	TRUE	4.10512e-06	0.0046721	36.313	42.2042	23.3427
rs17824268	C	T	C	T	-0.207447	0.0419573	0.0775349	0.04806	64001009	0.0210257	0.0181828	244562	GCST90027588	14	64467727	0.03728	2.63e-08	7738	0.00398668	7738	2.17719e-05	244562	TRUE	3.96643e-07	0.0061559	47.917	42.2042	30.9644
rs2214921	C	T	C	T	0.0970074	-0.00800056	0.451155	0.4959	19982243	0.302159	0.00775387	244562	GCST90027588	7	20021866	0.0207363	2.9e-06	7738	0.002821	7738	4.35327e-06	244562	TRUE	9.74569e-06	0.00466031	36.221	42.2042	21.885
rs35989200	G	A	G	A	-0.118268	-0.00954215	0.222871	0.2597	161604515	0.271442	0.00867667	244562	GCST90027588	1	161574305	0.0254197	3.28e-06	7738	0.00279038	7738	4.94537e-06	244562	TRUE	1.1559e-05	0.00484519	37.6649	42.2042	21.6468
rs4732939	A	G	A	G	-0.115704	-0.00566835	0.182099	0.183	29402622	0.566658	0.00989275	244562	GCST90027588	8	29260139	0.0254458	5.44e-06	7738	0.00266556	7738	1.34244e-06	244562	TRUE	1.21866e-05	0.00398782	30.9733	42.2042	20.6759
rs4833077	A	T	A	T	-0.11289	-0.0151266	0.711889	0.7055	38644755	0.0968278	0.00911005	244562	GCST90027588	4	38646376	0.0219353	2.65e-07	7738	0.00341211	7738	1.12733e-05	244562	TRUE	1.81462e-06	0.00522773	40.6542	42.2042	26.4865
rs6673038	A	G	A	G	-0.108493	0.00908173	0.313532	0.2965	8977487	0.32311	0.00919122	244562	GCST90027588	1	9037546	0.0222817	1.12e-06	7738	0.00305535	7738	3.99212e-06	244562	TRUE	3.87147e-06	0.00506682	39.3965	42.2042	23.7086
rs706115	G	C	G	C	0.135348	0.0022971	0.123756	0.181	33253607	0.821089	0.0101577	244562	GCST90027588	9	33253605	0.0304351	8.7e-06	7738	0.00254993	7738	2.09116e-07	244562	TRUE	1.44666e-05	0.00397306	30.8582	42.2042	19.7767
rs73391984	A	T	A	T	0.103646	0.000990996	0.250723	0.2035	37593688	0.915834	0.00937708	244562	GCST90027588	15	37885889	0.0233167	8.78e-06	7738	0.00254769	7738	4.56692e-08	244562	TRUE	1.32569e-05	0.00403619	31.3505	42.2042	19.7593
rs9843052	T	C	T	C	0.0928302	0.00371523	0.387586	0.3978	88634302	0.648201	0.00814274	244562	GCST90027588	3	88683452	0.020494	5.91e-06	7738	0.0026452	7738	8.51225e-07	244562	TRUE	1.20046e-05	0.00409093	31.7774	42.2042	20.5175
rs10157025	C	T	C	T	-0.110868	0.0048162	0.302832	0.3436	47637420	0.592988	0.00901048	244562	GCST90027589	1	48103092	0.0248192	7.93e-06	7738	0.00257277	7738	1.16823e-06	244562	TRUE	1.6907e-05	0.00519017	40.3606	42.2042	19.9543
rs11127546	T	C	T	C	-0.124979	-0.0130665	0.365695	0.3538	76498437	0.0979242	0.00789516	244562	GCST90027589	3	76547588	0.0237293	1.39e-07	7738	0.003573	7738	1.11997e-05	244562	TRUE	9.96716e-07	0.00724638	56.4672	42.2042	27.7399
rs12145292	A	C	A	C	-0.120792	-0.00240843	0.266384	0.2566	9058537	0.773692	0.00837572	244562	GCST90027589	1	9118596	0.0254599	2.09e-06	7738	0.00290125	7738	3.38094e-07	244562	TRUE	3.87093e-06	0.00570274	44.3694	42.2042	22.5094
rs12472996	C	T	C	T	0.104117	-0.0123109	0.478197	0.4479	36300590	0.109108	0.00768367	244562	GCST90027589	2	36527733	0.022917	5.54e-06	7738	0.00266106	7738	1.04967e-05	244562	TRUE	2.78687e-05	0.00540987	42.0784	42.2042	20.6409
rs12974688	C	T	C	T	-0.126722	0.0103616	0.779169	0.6953	55752784	0.220032	0.0084485	244562	GCST90027589	19	56264150	0.0281725	6.86e-06	7738	0.00260857	7738	6.15045e-06	244562	TRUE	2.53539e-05	0.00552619	42.9882	42.2042	20.2327
rs13125215	C	T	C	T	0.118644	-0.00475807	0.621948	0.545	146040527	0.544249	0.00784642	244562	GCST90027589	4	146961679	0.0230358	2.6e-07	7738	0.00341729	7738	1.5036e-06	244562	TRUE	6.99683e-07	0.00661953	51.5499	42.2042	26.5268
rs17777155	G	A	G	A	-0.17509	0.0147462	0.115057	0.09407	18201244	0.234335	0.0123994	244562	GCST90027589	9	18201242	0.036786	1.94e-06	7738	0.00291992	7738	5.78323e-06	244562	TRUE	7.62905e-06	0.00624282	48.5979	42.2042	22.6547
rs1975618	T	A	T	A	-0.114452	0.00154247	0.277249	0.2812	6498013	0.858091	0.00862656	244562	GCST90027589	8	6355534	0.024993	4.66e-06	7738	0.00270345	7738	1.30729e-07	244562	TRUE	7.64172e-06	0.00524971	40.8261	42.2042	20.9706
rs4256433	C	T	C	T	0.137098	0.00309173	0.698956	0.7198	33988695	0.717844	0.00855625	244562	GCST90027589	6	33956472	0.0283429	1.32e-06	7738	0.00301541	7738	5.33889e-07	244562	TRUE	2.64763e-06	0.00790992	61.679	42.2042	23.3977
rs57864512	C	T	C	T	-0.183386	-0.005528	0.0888622	0.08589	75374318	0.766637	0.0186268	244562	GCST90027589	8	76286553	0.0414208	9.54e-06	7738	0.00252743	7738	3.60142e-07	244562	TRUE	1.67056e-05	0.00544582	42.3596	42.2042	19.6018
rs6429177	A	C	A	C	-0.100882	0.00856873	0.481367	0.455	240062120	0.265289	0.00769202	244562	GCST90027589	1	240225420	0.022743	9.18e-06	7738	0.00253695	7738	5.07417e-06	244562	TRUE	3.04562e-05	0.00508152	39.5114	42.2042	19.6758
rs6539151	C	T	C	T	-0.225839	0.0195589	0.0545336	0.08282	104412454	0.230139	0.0162991	244562	GCST90027589	12	104806232	0.0502025	6.84e-06	7738	0.00260913	7738	5.8881e-06	244562	TRUE	2.47866e-05	0.00525942	40.902	42.2042	20.237
rs904477	A	G	A	G	0.11731	-0.0141335	0.349661	0.2924	128601363	0.106376	0.00875303	244562	GCST90027589	4	129522518	0.0239144	9.32e-07	7738	0.00310089	7738	1.06609e-05	244562	TRUE	5.51726e-06	0.00625874	48.7226	42.2042	24.0631
rs12370008	T	C	T	C	-0.202656	0.0149752	0.26683	0.2321	87792015	0.137838	0.0100918	244562	GCST90027590	12	88185792	0.0393497	2.6e-07	7738	0.00341691	7738	9.00356e-06	244562	TRUE	1.52812e-06	0.016069	126.34	42.2042	26.5238
rs2566156	T	A	T	A	-0.211024	-0.0010713	0.758147	0.7924	39009351	0.907831	0.00925331	244562	GCST90027590	4	39010971	0.0431455	1e-06	7738	0.00308273	7738	5.48079e-08	244562	TRUE	1.64827e-06	0.0163305	128.43	42.2042	23.9217
rs7111149	G	A	G	A	-0.159116	-0.00517989	0.551132	0.5757	130588434	0.505903	0.00778661	244562	GCST90027590	11	130458329	0.0338914	2.67e-06	7738	0.00284117	7738	1.8095e-06	244562	TRUE	6.68815e-06	0.0125266	98.1348	42.2042	22.0419
rs7709170	A	G	A	G	-0.295711	0.027688	0.0844097	0.06135	172980719	0.129385	0.0182575	244562	GCST90027590	5	172407722	0.0624037	2.15e-06	7738	0.00289427	7738	9.40402e-06	244562	TRUE	1.09567e-05	0.0135163	105.995	42.2042	22.4551
rs7736485	C	G	C	G	-0.172725	0.00952612	0.295741	0.2904	41297830	0.25934	0.0084455	244562	GCST90027590	5	41297932	0.037459	4.01e-06	7738	0.00274088	7738	5.20228e-06	244562	TRUE	1.42524e-05	0.0124275	97.3491	42.2042	21.2617
rs79050429	A	G	A	G	0.330161	0.0297207	0.0670987	0.0593	32376333	0.0938383	0.0177385	244562	GCST90027590	11	32397879	0.0735189	7.09e-06	7738	0.0026002	7738	1.14787e-05	244562	TRUE	3.69321e-05	0.0136468	107.032	42.2042	20.1676
rs9678313	A	T	A	T	-0.154784	-0.00128016	0.383104	0.3231	7492832	0.869114	0.00776872	244562	GCST90027590	2	7632963	0.0347838	8.59e-06	7738	0.00255312	7738	1.11031e-07	244562	TRUE	1.36051e-05	0.0113243	88.6081	42.2042	19.8015
rs10885766	A	G	A	G	-0.174391	-0.00721581	0.126579	0.1063	115675914	0.601868	0.0138309	244562	GCST90027591	10	117435424	0.0391878	8.58e-06	7738	0.0025534	7738	1.11297e-06	244562	TRUE	1.80382e-05	0.00672455	52.3733	42.2042	19.8037
rs11127546	T	C	T	C	-0.122309	-0.0130665	0.361736	0.3538	76498437	0.0979242	0.00789516	244562	GCST90027591	3	76547588	0.0261994	3.04e-06	7738	0.00280929	7738	1.11997e-05	244562	TRUE	1.67716e-05	0.00690779	53.8103	42.2042	21.7939
rs12472996	C	T	C	T	0.129542	-0.0123109	0.477207	0.4479	36300590	0.109108	0.00768367	244562	GCST90027591	2	36527733	0.0252135	2.78e-07	7738	0.00340063	7738	1.04967e-05	244562	TRUE	1.79983e-06	0.00837313	65.3215	42.2042	26.397
rs1353171	C	G	C	G	0.126243	0.00881884	0.685913	0.6524	118860759	0.273806	0.00805859	244562	GCST90027591	8	119872998	0.027356	3.93e-06	7738	0.00274536	7738	4.89685e-06	244562	TRUE	1.36425e-05	0.00686695	53.49	42.2042	21.2966
rs143123895	C	G	C	G	-0.266546	-0.0177863	0.0527531	0.03579	33430474	0.425655	0.0223264	244562	GCST90027591	1	33896075	0.0584856	5.18e-06	7738	0.00267772	7738	2.59506e-06	244562	TRUE	1.39103e-05	0.00710044	55.3218	42.2042	20.7705
rs2096489	T	C	T	C	-0.140104	-0.0208782	0.212284	0.229	32010507	0.0232343	0.00919923	244562	GCST90027591	21	33382820	0.0306707	4.92e-06	7738	0.00269009	7738	2.10615e-05	244562	TRUE	4.17205e-05	0.00656475	51.1205	42.2042	20.8667
rs4376168	T	G	T	G	0.136769	-0.00297118	0.791977	0.7393	146042936	0.719789	0.00828225	244562	GCST90027591	4	146964088	0.030574	7.7e-06	7738	0.00258008	7738	5.2623e-07	244562	TRUE	1.42955e-05	0.00616353	47.9767	42.2042	20.0111
rs4631866	A	G	A	G	0.112825	0.000482399	0.511771	0.5542	41036027	0.950673	0.00779803	244562	GCST90027591	11	41057577	0.024948	6.11e-06	7738	0.00263679	7738	1.5648e-08	244562	TRUE	9.01838e-06	0.00636121	49.5254	42.2042	20.4522
rs61909500	T	C	T	C	0.130785	0.00740055	0.290429	0.2403	5372784	0.414906	0.00907719	244562	GCST90027591	12	5481950	0.0279042	2.77e-06	7738	0.00283158	7738	2.71793e-06	244562	TRUE	7.84801e-06	0.00704988	54.9251	42.2042	21.9673
rs6975001	G	C	G	C	0.131293	0.00359047	0.715942	0.729	17577508	0.701165	0.00935632	244562	GCST90027591	7	17617132	0.0277397	2.21e-06	7738	0.0028874	7738	6.02154e-07	244562	TRUE	4.4287e-06	0.00701129	54.6223	42.2042	22.4016
rs79754311	C	A	C	A	-0.274184	0.0118749	0.0591669	0.03988	19976156	0.592183	0.0221681	244562	GCST90027591	12	20129090	0.053266	2.64e-07	7738	0.00341336	7738	1.17332e-06	244562	TRUE	6.6637e-07	0.00836962	65.2938	42.2042	26.4962
rs80113686	C	G	C	G	-0.212981	0.0136523	0.112653	0.08998	18127676	0.281329	0.0126722	244562	GCST90027591	9	18127674	0.0412569	2.44e-07	7738	0.00343304	7738	4.74588e-06	244562	TRUE	1.00487e-06	0.00906876	70.798	42.2042	26.6495
rs8014026	A	T	A	T	0.126787	-0.0115567	0.259994	0.2935	26180884	0.214741	0.00931516	244562	GCST90027591	14	26650090	0.0286664	9.74e-06	7738	0.00252226	7738	6.2936e-06	244562	TRUE	3.54688e-05	0.00618555	48.1492	42.2042	19.5615
rs8055404	G	A	G	A	0.114493	-0.00274148	0.363206	0.3517	7695045	0.73675	0.00815528	244562	GCST90027591	16	7745047	0.0255687	7.54e-06	7738	0.00258523	7738	4.62069e-07	244562	TRUE	1.37614e-05	0.00606373	47.1952	42.2042	20.0512
rs867279	G	A	G	A	-0.172952	0.00134097	0.129206	0.1575	148586456	0.89073	0.00976099	244562	GCST90027591	5	147966019	0.0383065	6.33e-06	7738	0.00262813	7738	7.7173e-08	244562	TRUE	9.92e-06	0.006731	52.4238	42.2042	20.3848
rs904477	A	G	A	G	0.130923	-0.0141335	0.350847	0.2924	128601363	0.106376	0.00875303	244562	GCST90027591	4	129522518	0.0264873	7.7e-07	7738	0.00314826	7738	1.06609e-05	244562	TRUE	4.62979e-06	0.00780776	60.8762	42.2042	24.4319
rs10026887	T	C	T	C	-0.0821104	-0.000640515	0.309497	0.2822	62232217	0.939793	0.00848027	244562	GCST90027592	4	63097935	0.0175353	2.83e-06	7738	0.00282634	7738	2.33267e-08	244562	TRUE	4.33705e-06	0.0028817	22.3572	42.2042	21.9265
rs112214356	C	T	C	T	-0.142819	-0.0283245	0.081092	0.08793	196197114	0.0738159	0.0158436	244562	GCST90027592	3	195923985	0.0299741	1.89e-06	7738	0.00292611	7738	1.30684e-05	244562	TRUE	1.21146e-05	0.00303985	23.588	42.2042	22.7028
rs115981692	A	G	A	G	0.163905	0.0100304	0.052016	0.02556	215995646	0.549924	0.0167768	244562	GCST90027592	1	216168988	0.036126	5.71e-06	7738	0.00265384	7738	1.46162e-06	244562	TRUE	1.30066e-05	0.00264943	20.5504	42.2042	20.5847
rs12976953	T	C	T	C	0.128883	0.0171465	0.0983496	0.09816	52276207	0.167302	0.0124167	244562	GCST90027592	19	52779460	0.0282085	4.9e-06	7738	0.00269119	7738	7.79743e-06	244562	TRUE	2.09748e-05	0.002946	22.8576	42.2042	20.8752
rs2305506	T	C	T	C	0.125303	-0.00878064	0.121951	0.1043	176319985	0.400585	0.010446	244562	GCST90027592	4	177241136	0.0260045	1.45e-06	7738	0.00299232	7738	2.88914e-06	244562	TRUE	4.34382e-06	0.00336246	26.0997	42.2042	23.2181
rs34631763	T	C	T	C	0.171802	-0.00506646	0.0525127	0.0726	92483381	0.761448	0.0166891	244562	GCST90027592	1	92948938	0.0368172	3.07e-06	7738	0.00280684	7738	3.76843e-07	244562	TRUE	5.66134e-06	0.00293714	22.7886	42.2042	21.7748
rs35778179	T	C	T	C	-0.142549	-0.00232966	0.0884996	0.07362	92369629	0.89217	0.0171856	244562	GCST90027592	14	92835973	0.0312626	5.12e-06	7738	0.00268038	7738	7.51399e-08	244562	TRUE	8.07245e-06	0.00327836	25.4448	42.2042	20.7911
rs72731514	C	T	C	T	0.159702	-0.0080124	0.056733	0.08691	68733547	0.463785	0.0109365	244562	GCST90027592	14	69200264	0.03511	5.4e-06	7738	0.00266737	7738	2.19473e-06	244562	TRUE	1.37519e-05	0.00272974	21.1751	42.2042	20.6899
rs73334581	T	C	T	C	0.0963108	-0.00214711	0.184125	0.1605	61481318	0.836378	0.0103962	244562	GCST90027592	17	59558679	0.0208168	3.72e-06	7738	0.00275934	7738	1.74411e-07	244562	TRUE	6.28521e-06	0.00278687	21.6195	42.2042	21.4053
rs10219622	A	G	A	G	0.161208	-0.00983388	0.576107	0.6033	127762298	0.203735	0.00773723	244562	GCST90027593	12	128246843	0.0362902	8.9e-06	7738	0.00254432	7738	6.60527e-06	244562	TRUE	3.34103e-05	0.012693	99.455	42.2042	19.7331
rs12670364	T	C	T	C	-0.291836	-0.00682061	0.0808324	0.1002	8289250	0.725476	0.0194237	244562	GCST90027593	7	8328880	0.0652628	7.76e-06	7738	0.00257815	7738	5.04196e-07	244562	TRUE	1.43159e-05	0.0126558	99.1598	42.2042	19.9961
rs17035816	G	A	G	A	0.338356	-0.0280013	0.0550314	0.04294	157167312	0.279129	0.0258726	244562	GCST90027593	4	158088464	0.0765185	9.78e-06	7738	0.00252117	7738	4.7895e-06	244562	TRUE	3.15531e-05	0.0119071	93.2233	42.2042	19.5531
rs2300878	G	A	G	A	-0.155994	-0.000247542	0.464045	0.4519	68936997	0.974951	0.00788365	244562	GCST90027593	14	69403714	0.0346216	6.62e-06	7738	0.00261738	7738	4.03142e-09	244562	TRUE	9.49545e-06	0.0121041	94.785	42.2042	20.3012
rs2968511	G	C	G	C	0.168322	0.00803317	0.328169	0.3282	72345820	0.38957	0.00933658	244562	GCST90027593	7	71810805	0.0379565	9.22e-06	7738	0.00253566	7738	3.02699e-06	244562	TRUE	2.51653e-05	0.0124931	97.8691	42.2042	19.6657
rs3792267	A	G	A	G	-0.18953	-0.011498	0.260377	0.2689	240591757	0.206792	0.00910779	244562	GCST90027593	2	241531174	0.0398733	2e-06	7738	0.00291212	7738	6.51674e-06	244562	TRUE	8.3406e-06	0.0138356	108.534	42.2042	22.5939
rs4768167	T	G	T	G	-0.216629	-0.0167889	0.830486	0.8446	39667552	0.120892	0.0108243	244562	GCST90027593	12	40061354	0.0466189	3.37e-06	7738	0.00278344	7738	9.83686e-06	244562	TRUE	1.70015e-05	0.013213	103.584	42.2042	21.5928
rs72995495	C	A	C	A	-0.393466	0.0108872	0.0530657	0.05624	8195528	0.59589	0.0205295	244562	GCST90027593	19	8260412	0.0876548	7.16e-06	7738	0.00259787	7738	1.14998e-06	244562	TRUE	1.52942e-05	0.0155589	122.266	42.2042	20.1494
rs12515947	A	G	A	G	-0.0791647	-0.00172433	0.547945	0.5307	123714648	0.822792	0.00769943	244562	GCST90027594	5	123050342	0.015697	4.58e-07	7738	0.00327709	7738	2.05087e-07	244562	TRUE	8.51675e-07	0.00310471	24.0929	42.2042	25.4349
rs1408765	G	A	G	A	-0.0729139	0.00122469	0.573549	0.5613	138060609	0.877089	0.00791857	244562	GCST90027594	8	139072852	0.0161251	6.13e-06	7738	0.00263605	7738	9.78077e-08	244562	TRUE	9.75282e-06	0.0026007	20.1715	42.2042	20.4464
rs149854766	T	A	T	A	-0.153123	-0.0210942	0.06483	0.06646	52337860	0.257467	0.0186279	244562	GCST90027594	18	49864230	0.0343351	8.21e-06	7738	0.00256432	7738	5.24337e-06	244562	TRUE	2.78553e-05	0.002843	22.0562	42.2042	19.8886
rs2737651	C	T	C	T	-0.0980458	0.00197004	0.157242	0.1503	200066924	0.851003	0.0104879	244562	GCST90027594	1	200036052	0.0217422	6.5e-06	7738	0.00262177	7738	1.44273e-07	244562	TRUE	1.05938e-05	0.00254777	19.7599	42.2042	20.3353
rs28404149	A	G	A	G	0.100438	0.00255605	0.145481	0.1329	146377556	0.807528	0.0104921	244562	GCST90027594	4	147298708	0.0222011	6.07e-06	7738	0.00263866	7738	2.42676e-07	244562	TRUE	1.03746e-05	0.00250815	19.4519	42.2042	20.4667
rs55754265	T	C	T	C	-0.100856	-0.00571196	0.15878	0.138	49650053	0.665932	0.0132302	244562	GCST90027594	3	49687486	0.0215998	3.02e-06	7738	0.00281038	7738	7.62174e-07	244562	TRUE	6.20975e-06	0.00271731	21.0784	42.2042	21.8024
rs6043418	A	G	A	G	0.0789955	-0.00718522	0.557127	0.5634	15667095	0.349661	0.0076827	244562	GCST90027594	20	15647740	0.0160474	8.54e-07	7738	0.00312263	7738	3.57656e-06	244562	TRUE	2.86889e-06	0.00307941	23.8959	42.2042	24.2323
rs62072709	C	T	C	T	-0.0979355	0.019952	0.731824	0.7086	56859291	0.0147506	0.00818226	244562	GCST90027594	17	54936652	0.0185586	1.31e-07	7738	0.00358685	7738	2.43125e-05	244562	TRUE	1.887e-06	0.00376476	29.2342	42.2042	27.8477
rs7222575	C	A	C	A	-0.0891912	-0.016533	0.234593	0.2566	81329422	0.0809469	0.00947331	244562	GCST90027594	17	79303222	0.0186944	1.83e-06	7738	0.00293379	7738	1.2454e-05	244562	TRUE	1.13809e-05	0.00285681	22.1636	42.2042	22.7626
rs7377535	A	G	A	G	-0.0757541	0.0109036	0.630164	0.5583	188143344	0.16546	0.00786162	244562	GCST90027594	4	189064498	0.0163952	3.83e-06	7738	0.00275211	7738	7.86551e-06	244562	TRUE	1.67822e-05	0.00267488	20.7484	42.2042	21.3491
rs7589782	T	C	T	C	0.142071	0.0156426	0.0783541	0.06851	215589522	0.298804	0.0150554	244562	GCST90027594	2	216454245	0.0294218	1.37e-06	7738	0.00300503	7738	4.41413e-06	244562	TRUE	4.88769e-06	0.00291519	22.6178	42.2042	23.317
rs7700033	A	C	A	C	0.0750812	0.0143509	0.589881	0.6258	93200250	0.0650025	0.00777725	244562	GCST90027594	4	94121401	0.0159171	2.39e-06	7738	0.00286794	7738	1.39224e-05	244562	TRUE	1.57074e-05	0.00272751	21.1577	42.2042	22.2502
rs79257569	A	G	A	G	-0.115155	0.00322577	0.122217	0.08384	6965728	0.822366	0.0143685	244562	GCST90027594	19	6965739	0.0257427	7.7e-06	7738	0.00258	7738	2.06091e-07	244562	TRUE	1.28461e-05	0.00284521	22.0734	42.2042	20.0105
rs7997810	A	G	A	G	0.0785295	-0.00438004	0.358779	0.3282	52805105	0.597083	0.00828612	244562	GCST90027594	13	53379240	0.0164352	1.77e-06	7738	0.00294252	7738	1.14253e-06	244562	TRUE	4.04333e-06	0.00283746	22.0131	42.2042	22.8305
rs9999406	C	T	C	T	-0.072055	-0.0151684	0.534069	0.5133	53515178	0.0490603	0.00770726	244562	GCST90027594	4	54381345	0.0163034	9.89e-06	7738	0.00251861	7738	1.58375e-05	244562	TRUE	6.21112e-05	0.00258391	20.0409	42.2042	19.5331
rs11657406	T	G	T	G	-0.101907	-0.000363237	0.166064	0.1728	7346551	0.969613	0.00953536	244562	GCST90027595	17	7249870	0.0217462	2.78e-06	7738	0.0028307	7738	5.93363e-09	244562	TRUE	4.13152e-06	0.00287638	22.3159	42.2042	21.9605
rs1263629	G	A	G	A	0.102583	0.0216475	0.181109	0.1299	207072187	0.0923953	0.0128632	244562	GCST90027595	2	207936911	0.0209988	1.03e-06	7738	0.00307544	7738	1.15804e-05	244562	TRUE	6.41385e-06	0.00312138	24.2226	42.2042	23.865
rs17366560	T	A	T	A	0.166331	0.00127109	0.0610195	0.05317	43361164	0.953681	0.0218833	244562	GCST90027595	10	43856612	0.0353081	2.47e-06	7738	0.00286047	7738	1.37956e-08	244562	TRUE	3.73904e-06	0.00317031	24.6035	42.2042	22.1921
rs17829116	A	G	A	G	0.102872	-0.00414917	0.183342	0.1697	95478141	0.683888	0.0101904	244562	GCST90027595	14	95944478	0.0217188	2.17e-06	7738	0.00289167	7738	6.77878e-07	244562	TRUE	4.44259e-06	0.00316903	24.5936	42.2042	22.4348
rs28535665	C	G	C	G	0.164286	0.0442911	0.0586869	0.08793	87148354	0.0425236	0.0218359	244562	GCST90027595	15	87691585	0.0370063	9.02e-06	7738	0.00254114	7738	1.68228e-05	244562	TRUE	5.98172e-05	0.00298199	23.1377	42.2042	19.7083
rs4777110	T	C	T	C	-0.0744398	0.00931268	0.580713	0.6053	69091445	0.230598	0.00776821	244562	GCST90027595	15	69383785	0.0163769	5.48e-06	7738	0.00266362	7738	5.87652e-06	244562	TRUE	2.01694e-05	0.00269844	20.9316	42.2042	20.6608
rs4958506	A	G	A	G	0.0743958	0.00804321	0.398147	0.4305	151967803	0.294238	0.00766845	244562	GCST90027595	5	151347364	0.0167606	9.05e-06	7738	0.00254037	7738	4.49838e-06	244562	TRUE	2.85957e-05	0.00265253	20.5746	42.2042	19.7023
rs505128	C	T	C	T	-0.0773775	0.00873713	0.353709	0.3957	116402794	0.300666	0.00844162	244562	GCST90027595	11	116273511	0.0168186	4.21e-06	7738	0.00272864	7738	4.38025e-06	244562	TRUE	1.38608e-05	0.00273737	21.2344	42.2042	21.1665
rs6804526	G	A	G	A	0.111336	0.0143244	0.170134	0.1575	192371389	0.215631	0.0115685	244562	GCST90027595	3	192089178	0.0214587	2.12e-07	7738	0.00346768	7738	6.26923e-06	244562	TRUE	1.01796e-06	0.00350026	27.1731	42.2042	26.9193
rs72829932	G	A	G	A	-0.100368	-0.0156169	0.183187	0.2014	35728916	0.122071	0.0101006	244562	GCST90027595	17	34055935	0.020885	1.54e-06	7738	0.00297653	7738	9.77479e-06	244562	TRUE	8.26799e-06	0.00301466	23.3919	42.2042	23.0952
rs72831788	C	T	C	T	-0.124701	-0.00585218	0.104502	0.135	103361041	0.658297	0.0132323	244562	GCST90027595	2	103977499	0.0268023	3.28e-06	7738	0.0027904	7738	7.99799e-07	244562	TRUE	6.76734e-06	0.00291044	22.5809	42.2042	21.6469
rs75314238	T	A	T	A	-0.167732	-0.0207978	0.0560906	0.06748	11631675	0.0896252	0.0122529	244562	GCST90027595	20	11612323	0.0361844	3.56e-06	7738	0.00276992	7738	1.17806e-05	244562	TRUE	2.00568e-05	0.00297908	23.115	42.2042	21.4877
rs78048823	T	C	T	C	0.184638	0.0227275	0.0535389	0.06033	24035950	0.25103	0.0198	244562	GCST90027595	16	24047271	0.0359187	2.74e-07	7738	0.00340411	7738	5.38745e-06	244562	TRUE	1.19273e-06	0.00345497	26.8203	42.2042	26.4241
rs8004382	G	A	G	A	-0.0730588	-0.00521883	0.500582	0.545	20687234	0.497587	0.00769408	244562	GCST90027595	14	21155393	0.0161353	5.96e-06	7738	0.00264317	7738	1.88125e-06	244562	TRUE	1.44496e-05	0.00266879	20.701	42.2042	20.5018
rs10172221	C	G	C	G	0.16467	-0.00268022	0.131808	0.1421	34789590	0.791285	0.0101277	244562	GCST90027596	2	35014657	0.0366974	7.22e-06	7738	0.00259605	7738	2.86374e-07	244562	TRUE	1.246e-05	0.00620607	48.31	42.2042	20.1353
rs10463321	G	T	G	T	0.137597	0.00644172	0.204651	0.2301	151944344	0.463444	0.00878591	244562	GCST90027596	5	151323905	0.0307884	7.85e-06	7738	0.00257518	7738	2.19808e-06	244562	TRUE	1.95892e-05	0.00616339	47.9757	42.2042	19.973
rs113976504	T	C	T	C	-0.272739	0.00803556	0.0528666	0.0409	81130531	0.688594	0.0200506	244562	GCST90027596	13	81704666	0.05958	4.7e-06	7738	0.00270148	7738	6.56737e-07	244562	TRUE	9.22952e-06	0.00744933	58.0605	42.2042	20.9553
rs11898768	G	A	G	A	0.2225	-0.00807192	0.117282	0.1278	230554591	0.630429	0.0167772	244562	GCST90027596	2	231419306	0.0396483	2e-08	7738	0.00405443	7738	9.46513e-07	244562	TRUE	5.42444e-08	0.0102505	80.1188	42.2042	31.4928
rs12209400	T	C	T	C	0.134862	0.0041026	0.229876	0.2014	156128631	0.687116	0.0101859	244562	GCST90027596	6	156449765	0.0295886	5.17e-06	7738	0.00267824	7738	6.63335e-07	244562	TRUE	1.01164e-05	0.00643967	50.1402	42.2042	20.7745
rs12550124	T	A	T	A	-0.172648	-0.0136571	0.87165	0.8333	49782220	0.236241	0.0115305	244562	GCST90027596	8	50694780	0.0371575	3.38e-06	7738	0.00278294	7738	5.73633e-06	244562	TRUE	1.27243e-05	0.00666947	51.9414	42.2042	21.5889
rs2636908	C	T	C	T	0.251351	0.00520718	0.0742992	0.06953	193958627	0.813508	0.0220734	244562	GCST90027596	3	193676416	0.0542266	3.57e-06	7738	0.00276959	7738	2.27552e-07	244562	TRUE	6.18748e-06	0.00869052	67.8193	42.2042	21.4851
rs3750879	A	C	A	C	0.124154	-0.00491432	0.34867	0.408	13699632	0.54989	0.00821896	244562	GCST90027596	10	13741632	0.0265636	2.96e-06	7738	0.00281583	7738	1.46187e-06	244562	TRUE	6.974e-06	0.00700111	54.5425	42.2042	21.8448
rs7979020	T	C	T	C	-0.162825	0.0193363	0.138499	0.138	124491128	0.0365023	0.00924612	244562	GCST90027596	12	124975674	0.0367534	9.41e-06	7738	0.00253064	7738	1.78828e-05	244562	TRUE	6.51153e-05	0.00632666	49.2547	42.2042	19.6267
rs9316763	C	T	C	T	0.114104	0.0115295	0.465734	0.4284	55103882	0.138736	0.0077875	244562	GCST90027596	13	55678017	0.0257771	9.57e-06	7738	0.0025265	7738	8.96264e-06	244562	TRUE	4.18847e-05	0.00647929	50.4506	42.2042	19.5945
rs10152918	A	G	A	G	-0.204226	0.00653745	0.417203	0.3937	89808343	0.433479	0.00834655	244562	GCST90027597	15	90351574	0.0422004	1.3e-06	7738	0.00301828	7738	2.50852e-06	244562	TRUE	3.74929e-06	0.0202823	160.152	42.2042	23.4201
rs1030115	G	A	G	A	-0.28897	-0.00880896	0.110073	0.1207	237305765	0.568671	0.015454	244562	GCST90027597	1	237469065	0.0623148	3.53e-06	7738	0.00277205	7738	1.32855e-06	244562	TRUE	8.06663e-06	0.0163595	128.662	42.2042	21.5042
rs11822940	C	G	C	G	-0.201517	-0.00473278	0.261848	0.2331	119650287	0.612686	0.00934883	244562	GCST90027597	11	119520997	0.0404339	6.23e-07	7738	0.00320054	7738	1.04793e-06	244562	TRUE	1.46987e-06	0.0156981	123.378	42.2042	24.8389
rs12451647	G	A	G	A	-0.176071	-0.00156709	0.713511	0.6973	11749956	0.847982	0.00817496	244562	GCST90027597	17	11653273	0.0387149	5.42e-06	7738	0.00266651	7738	1.50256e-07	244562	TRUE	8.92171e-06	0.012674	99.3048	42.2042	20.6833
rs2166227	C	G	C	G	-0.166098	0.0149568	0.324661	0.2975	48558155	0.0717365	0.0083057	244562	GCST90027597	10	49766200	0.036818	6.44e-06	7738	0.00262392	7738	1.32597e-05	244562	TRUE	3.72203e-05	0.0120979	94.7356	42.2042	20.3521
rs2368650	G	A	G	A	-0.211497	-0.000469935	0.282367	0.3129	8975976	0.9559	0.00849802	244562	GCST90027597	4	8977702	0.0465319	5.49e-06	7738	0.00266337	7738	1.25042e-08	244562	TRUE	8.08103e-06	0.0181282	142.829	42.2042	20.6589
rs2602034	A	G	A	G	0.159327	-0.00249526	0.605644	0.6084	99196485	0.745336	0.00768256	244562	GCST90027597	15	99736690	0.0358941	9.05e-06	7738	0.00254045	7738	4.31354e-07	244562	TRUE	1.6235e-05	0.0121259	94.9575	42.2042	19.703
rs4440429	T	C	T	C	-0.163017	0.00267264	0.639166	0.638	68495475	0.728902	0.00771132	244562	GCST90027597	6	69205367	0.0358625	5.48e-06	7738	0.00266385	7738	4.91177e-07	244562	TRUE	1.0222e-05	0.0122579	96.0041	42.2042	20.6626
rs457793	G	C	G	C	0.162257	0.00190958	0.663735	0.6881	32103137	0.824606	0.00861627	244562	GCST90027597	13	32677274	0.0363365	7.99e-06	7738	0.00257091	7738	2.0084e-07	244562	TRUE	1.328e-05	0.011752	91.9949	42.2042	19.9398
rs55922034	A	C	A	C	-0.408074	-0.0150284	0.0555627	0.08384	120809504	0.234425	0.0126391	244562	GCST90027597	2	121567079	0.0866984	2.52e-06	7738	0.0028556	7738	5.781e-06	244562	TRUE	9.71574e-06	0.0174769	137.606	42.2042	22.1542
rs7665599	T	C	T	C	0.163375	0.00804001	0.619459	0.591	146492995	0.395555	0.00946344	244562	GCST90027597	4	147414147	0.0364988	7.6e-06	7738	0.0025833	7738	2.9514e-06	244562	TRUE	2.08043e-05	0.0125839	98.5897	42.2042	20.0361
rs806925	G	A	G	A	-0.171177	-0.0130072	0.657926	0.6247	53295993	0.101935	0.00795283	244562	GCST90027597	17	51373354	0.0371812	4.15e-06	7738	0.00273237	7738	1.09379e-05	244562	TRUE	2.19571e-05	0.0131892	103.395	42.2042	21.1955
rs10145503	G	A	G	A	-0.0925465	0.0120771	0.198072	0.2045	57919910	0.329872	0.0123948	244562	GCST90027598	14	58386628	0.0202458	4.85e-06	7738	0.00269378	7738	3.88206e-06	244562	TRUE	1.5074e-05	0.00272087	21.1061	42.2042	20.8954
rs12420239	A	G	A	G	-0.095626	0.00163503	0.186183	0.1564	70579617	0.882629	0.0110746	244562	GCST90027598	11	70425722	0.0211507	6.15e-06	7738	0.00263536	7738	8.91265e-08	244562	TRUE	9.72353e-06	0.00277108	21.4966	42.2042	20.441
rs12868026	A	G	A	G	0.16246	0.0378758	0.0538899	0.03476	54529052	0.0290282	0.0173495	244562	GCST90027598	13	55103187	0.0356943	5.33e-06	7738	0.00267065	7738	1.94874e-05	244562	TRUE	4.19307e-05	0.00269136	20.8766	42.2042	20.7155
rs17067756	G	A	G	A	-0.173672	0.00459925	0.0585032	0.07873	106801426	0.765727	0.0154353	244562	GCST90027598	6	107249301	0.038162	5.34e-06	7738	0.00267005	7738	3.63041e-07	244562	TRUE	9.593e-06	0.00332268	25.7899	42.2042	20.7108
rs6035564	A	G	A	G	-0.077432	0.00201543	0.541036	0.5941	20151899	0.794048	0.00772025	244562	GCST90027598	20	20132543	0.0161053	1.53e-06	7738	0.00297914	7738	2.78668e-07	244562	TRUE	2.79669e-06	0.00297766	23.104	42.2042	23.1155
rs7083857	G	C	G	C	0.136762	0.00529861	0.0977465	0.1125	123920939	0.611238	0.010424	244562	GCST90027598	10	125680455	0.027691	7.86e-07	7738	0.00314318	7738	1.05649e-06	244562	TRUE	1.83592e-06	0.00329906	25.606	42.2042	24.3923
rs10015390	A	G	A	G	0.170577	-0.00850219	0.703903	0.636	114952891	0.298602	0.00817962	244562	GCST90027599	4	115874047	0.0361569	2.39e-06	7738	0.00286876	7738	4.41782e-06	244562	TRUE	8.18521e-06	0.0121288	94.9804	42.2042	22.2566
rs11741434	G	A	G	A	-0.215369	0.00259974	0.19109	0.1769	166093046	0.805142	0.0105381	244562	GCST90027599	5	165520051	0.0472708	5.21e-06	7738	0.00267609	7738	2.48855e-07	244562	TRUE	8.98778e-06	0.0143395	112.544	42.2042	20.7578
rs11867310	G	A	G	A	-0.150271	0.0168163	0.528379	0.4519	1217503	0.0336062	0.00791443	244562	GCST90027599	17	1120797	0.0330792	5.55e-06	7738	0.00266052	7738	1.84599e-05	244562	TRUE	4.16244e-05	0.0112543	88.0544	42.2042	20.6367
rs1325380	C	T	C	T	0.174981	-0.00696962	0.2499	0.2464	108101205	0.456745	0.00936503	244562	GCST90027599	13	108753553	0.0388236	6.57e-06	7738	0.002619	7738	2.26471e-06	244562	TRUE	1.67051e-05	0.0114788	89.8313	42.2042	20.3138
rs16829385	T	A	T	A	0.219994	-0.012612	0.130089	0.1207	187927136	0.213711	0.0101429	244562	GCST90027599	2	188791863	0.0477522	4.09e-06	7738	0.00273608	7738	6.32196e-06	244562	TRUE	1.59071e-05	0.0109539	85.6775	42.2042	21.2244
rs2292862	T	A	T	A	-0.169423	-0.0016926	0.653047	0.6708	62796717	0.840865	0.00842982	244562	GCST90027599	15	63088916	0.0370187	4.72e-06	7738	0.0027003	7738	1.64849e-07	244562	TRUE	7.87685e-06	0.0130074	101.951	42.2042	20.9461
rs555615	C	T	C	T	-0.1961	-0.000478953	0.832982	0.8292	245438885	0.959925	0.00953184	244562	GCST90027599	1	245602187	0.044214	9.2e-06	7738	0.00253639	7738	1.0324e-08	244562	TRUE	1.32582e-05	0.0107	83.6705	42.2042	19.6714
rs6081036	T	C	T	C	0.174781	-0.00173316	0.675759	0.6534	18198899	0.824814	0.00782968	244562	GCST90027599	20	18179543	0.0338956	2.52e-07	7738	0.00342527	7738	2.00356e-07	244562	TRUE	4.78347e-07	0.0133868	104.966	42.2042	26.589
rs61861701	G	A	G	A	0.177643	0.010727	0.260402	0.1851	110605246	0.28151	0.00996069	244562	GCST90027599	10	112365004	0.0383181	3.55e-06	7738	0.00277056	7738	4.74231e-06	244562	TRUE	1.22318e-05	0.0121553	95.1906	42.2042	21.4926
rs62523849	C	T	C	T	0.331454	0.0286398	0.0576356	0.06442	87469548	0.061776	0.0153326	244562	GCST90027599	8	88481776	0.0706149	2.68e-06	7738	0.00283989	7738	1.42664e-05	244562	TRUE	1.77261e-05	0.011934	93.4365	42.2042	22.032
rs111370608	T	G	T	G	-0.20102	0.000890527	0.105908	0.1084	31529290	0.954275	0.0155309	244562	GCST90027600	3	31570782	0.0451296	8.42e-06	7738	0.00255815	7738	1.34437e-08	244562	TRUE	1.22397e-05	0.00765278	59.6585	42.2042	19.8406
rs147068992	A	G	A	G	-0.263745	0.0153004	0.0564545	0.03783	19984851	0.500183	0.0226941	244562	GCST90027600	12	20137785	0.0571971	4e-06	7738	0.00274102	7738	1.85863e-06	244562	TRUE	9.89278e-06	0.00741071	57.7573	42.2042	21.2628
rs17147827	T	G	T	G	0.174951	0.00712222	0.130363	0.1442	78457967	0.4905	0.0103293	244562	GCST90027600	7	78087284	0.0390923	7.63e-06	7738	0.00258233	7738	1.94401e-06	244562	TRUE	1.84159e-05	0.00693993	54.0625	42.2042	20.0286
rs1950861	A	G	A	G	-0.131261	0.00396315	0.255127	0.2843	26221365	0.642312	0.00853265	244562	GCST90027600	14	26690571	0.0296811	9.76e-06	7738	0.00252173	7738	8.82119e-07	244562	TRUE	1.94933e-05	0.00654847	50.9929	42.2042	19.5574
rs2065501	C	A	C	A	0.156778	-0.00527282	0.68472	0.6851	22140225	0.511495	0.00803157	244562	GCST90027600	9	22140224	0.0314314	6.1e-07	7738	0.00320577	7738	1.76238e-06	244562	TRUE	1.64316e-06	0.0106123	82.9774	42.2042	24.8796
rs28887188	A	G	A	G	0.223486	-0.0246464	0.0962352	0.1115	230560935	0.132439	0.0163812	244562	GCST90027600	2	231425650	0.044371	4.74e-07	7738	0.00326862	7738	9.25605e-06	244562	TRUE	2.69913e-06	0.008688	67.7994	42.2042	25.3689
rs4716795	C	T	C	T	0.177781	-0.00781147	0.871149	0.8252	157888000	0.500501	0.0115949	244562	GCST90027600	7	157680692	0.0401458	9.49e-06	7738	0.00252857	7738	1.85588e-06	244562	TRUE	2.23632e-05	0.00709547	55.2828	42.2042	19.6106
rs4968174	C	A	C	A	-0.128802	-0.00830292	0.535432	0.498	1176906	0.280765	0.00769785	244562	GCST90027600	17	1080200	0.0280471	4.38e-06	7738	0.00271876	7738	4.75702e-06	244562	TRUE	1.48975e-05	0.00825332	64.379	42.2042	21.0896
rs62465767	A	G	A	G	0.208553	0.00215773	0.0934947	0.08998	51600295	0.891872	0.0158731	244562	GCST90027600	7	51667991	0.0456689	4.96e-06	7738	0.00268848	7738	7.55584e-08	244562	TRUE	7.82297e-06	0.00737259	57.458	42.2042	20.8541
rs6858961	C	A	C	A	0.17174	-0.0092023	0.150873	0.1718	3305598	0.440188	0.011922	244562	GCST90027600	5	3305712	0.0366048	2.71e-06	7738	0.00283737	7738	2.43617e-06	244562	TRUE	7.40803e-06	0.00755713	58.9072	42.2042	22.0124
rs73379542	C	G	C	G	-0.279654	-0.00328938	0.0510867	0.05112	33910466	0.898957	0.0259049	244562	GCST90027600	15	34202667	0.0590033	2.14e-06	7738	0.00289543	7738	6.59293e-08	244562	TRUE	3.45685e-06	0.0075824	59.1056	42.2042	22.4641
rs7426276	A	G	A	G	-0.177033	0.0100625	0.149009	0.1155	1069014	0.462783	0.0137041	244562	GCST90027600	2	1064700	0.0371638	1.9e-06	7738	0.00292469	7738	2.20459e-06	244562	TRUE	5.14381e-06	0.00794833	61.9809	42.2042	22.6918
rs7784347	C	T	C	T	-0.271457	-0.00310715	0.0648245	0.08282	8290078	0.888309	0.0221237	244562	GCST90027600	7	8329708	0.0529763	2.99e-07	7738	0.0033826	7738	8.06534e-08	244562	TRUE	5.24316e-07	0.00893438	69.7394	42.2042	26.2566
rs78206502	A	G	A	G	0.272518	-0.00561232	0.0581025	0.06135	42443255	0.847843	0.0292504	244562	GCST90027600	7	42482854	0.0592538	4.24e-06	7738	0.00272681	7738	1.50534e-07	244562	TRUE	7.05029e-06	0.00812866	63.3986	42.2042	21.1523
rs7925466	C	A	C	A	-0.123848	-0.00480029	0.411115	0.3906	73067068	0.532146	0.00768374	244562	GCST90027600	11	72778113	0.026866	4.03e-06	7738	0.00273945	7738	1.59589e-06	244562	TRUE	9.56109e-06	0.0074268	57.8836	42.2042	21.2506
rs9401616	G	A	G	A	0.16293	-0.0182104	0.151187	0.1401	122923257	0.0843529	0.0105508	244562	GCST90027600	6	123244402	0.0367414	9.23e-06	7738	0.00253555	7738	1.21808e-05	244562	TRUE	4.87248e-05	0.00681332	53.0694	42.2042	19.6649
rs2999900	C	T	C	T	0.137782	0.00897935	0.838843	0.8231	13504359	0.328784	0.00919482	244562	GCST90027601	1	13830815	0.0276513	6.27e-07	7738	0.00319923	7738	3.89957e-06	244562	TRUE	2.22393e-06	0.00513269	39.9113	42.2042	24.8287
rs4949324	A	G	A	G	-0.0972248	-0.0108155	0.654959	0.6442	30904896	0.233444	0.00907695	244562	GCST90027601	1	31377743	0.0216366	7.01e-06	7738	0.00260332	7738	5.8053e-06	244562	TRUE	2.51695e-05	0.00427237	33.1929	42.2042	20.1918
rs75042717	C	A	C	A	0.120678	-0.0176879	0.160967	0.1677	44846439	0.091563	0.0104835	244562	GCST90027601	17	42923807	0.0271527	8.81e-06	7738	0.00254687	7738	1.16399e-05	244562	TRUE	4.53869e-05	0.00393371	30.5513	42.2042	19.7529
rs7784347	C	T	C	T	-0.2046	-0.00310715	0.0680514	0.08282	8290078	0.888309	0.0221237	244562	GCST90027601	7	8329708	0.0395806	2.35e-07	7738	0.00344217	7738	8.06534e-08	244562	TRUE	4.15978e-07	0.0053097	41.2951	42.2042	26.7206
rs7989592	C	T	C	T	-0.201336	-0.0220193	0.0541374	0.07362	78475706	0.0572348	0.0115799	244562	GCST90027601	13	79049841	0.0450433	7.83e-06	7738	0.002576	7738	1.47845e-05	244562	TRUE	4.78974e-05	0.00415144	32.2494	42.2042	19.9794
rs80055047	A	G	A	G	0.211269	0.0411697	0.0520199	0.03067	219174471	0.0919327	0.0244289	244562	GCST90027601	1	219347813	0.0470718	7.18e-06	7738	0.00259719	7738	1.16134e-05	244562	TRUE	3.76244e-05	0.00440221	34.206	42.2042	20.1442
rs10006164	A	G	A	G	-0.0805101	0.00550466	0.344209	0.4008	1027810	0.490343	0.00798051	244562	GCST90027602	4	1021598	0.0177448	5.7e-06	7738	0.00265392	7738	1.94542e-06	244562	TRUE	1.39927e-05	0.0029263	22.7043	42.2042	20.5854
rs10777971	G	T	G	T	0.0780639	-0.0182708	0.359993	0.3804	99358566	0.0203254	0.00787437	244562	GCST90027602	12	99752344	0.0168937	3.82e-06	7738	0.00275256	7738	2.20135e-05	244562	TRUE	3.46026e-05	0.00280808	21.7845	42.2042	21.3526
rs12463196	T	G	T	G	-0.138008	0.0161533	0.0749451	0.07975	16617922	0.176194	0.0119427	244562	GCST90027602	19	16728733	0.0307762	7.32e-06	7738	0.00259259	7738	7.48047e-06	244562	TRUE	2.96752e-05	0.00264088	20.484	42.2042	20.1084
rs1968451	C	T	C	T	0.0898689	-0.00157838	0.680575	0.6626	5391911	0.847673	0.00821695	244562	GCST90027602	19	5391922	0.0198891	6.23e-06	7738	0.00263225	7738	1.50875e-07	244562	TRUE	1.02033e-05	0.00351151	27.2608	42.2042	20.4168
rs2424026	G	A	G	A	-0.0847065	0.00329579	0.255692	0.226	16975993	0.726148	0.00940971	244562	GCST90027602	20	16956638	0.0186631	5.66e-06	7738	0.00265579	7738	5.01627e-07	244562	TRUE	1.05784e-05	0.00273107	21.1854	42.2042	20.5999
rs2461882	C	T	C	T	-0.124633	0.00443049	0.0962862	0.07566	70777395	0.754597	0.0141738	244562	GCST90027602	10	72537151	0.0274876	5.78e-06	7738	0.00265047	7738	3.99528e-07	244562	TRUE	1.04758e-05	0.00270328	20.9693	42.2042	20.5585
rs4374638	C	T	C	T	0.0768675	0.0125787	0.652683	0.5982	12425965	0.107484	0.00781477	244562	GCST90027602	4	12427589	0.0173682	9.61e-06	7738	0.00252558	7738	1.05937e-05	244562	TRUE	4.63246e-05	0.00267882	20.779	42.2042	19.5874
rs479744	T	G	T	G	-0.0947483	0.0182016	0.198548	0.2434	108698829	0.0436214	0.00902092	244562	GCST90027602	6	109020032	0.020739	4.91e-06	7738	0.00269079	7738	1.66466e-05	244562	TRUE	3.43655e-05	0.00285704	22.1654	42.2042	20.8722
rs74949229	A	G	A	G	-0.1307	0.0206607	0.0938701	0.06442	9484983	0.188133	0.0156982	244562	GCST90027602	10	9526946	0.0283073	3.89e-06	7738	0.00274816	7738	7.08278e-06	244562	TRUE	1.61034e-05	0.00290602	22.5465	42.2042	21.3184
rs7904867	C	T	C	T	-0.0760521	-0.00156912	0.377571	0.3742	80593031	0.842972	0.00792111	244562	GCST90027602	10	82352787	0.0169187	6.95e-06	7738	0.00260519	7738	1.60455e-07	244562	TRUE	1.13972e-05	0.00271857	21.0882	42.2042	20.2064
rs114537104	G	T	G	T	0.170007	-0.00571045	0.0602476	0.06135	43580586	0.701628	0.014905	244562	GCST90027603	4	43582603	0.0352783	1.44e-06	7738	0.00299295	7738	6.00195e-07	244562	TRUE	2.94216e-06	0.00327278	25.4014	42.2042	23.223
rs12782517	T	C	T	C	0.117953	-0.00039835	0.152274	0.1871	131770951	0.968534	0.0100984	244562	GCST90027603	10	133603287	0.0237137	6.56e-07	7738	0.00318798	7738	6.36272e-09	244562	TRUE	1.02191e-06	0.00359194	27.8874	42.2042	24.7411
rs145761301	A	G	A	G	0.125022	-0.00688183	0.106563	0.09714	167687999	0.550323	0.011522	244562	GCST90027603	6	168088679	0.0279809	7.89e-06	7738	0.00257403	7738	1.45869e-06	244562	TRUE	1.76801e-05	0.00297628	23.0932	42.2042	19.9641
rs4922591	C	T	C	T	-0.0761299	0.00153558	0.614008	0.5951	32352653	0.843189	0.00776267	244562	GCST90027603	11	32374199	0.0170206	7.72e-06	7738	0.00257942	7738	1.60006e-07	244562	TRUE	1.26026e-05	0.00274722	21.311	42.2042	20.006
rs57238953	A	G	A	G	-0.153964	-0.0343045	0.0675283	0.08487	27908205	0.00953103	0.0132327	244562	GCST90027603	16	27919526	0.0325341	2.22e-06	7738	0.00288661	7738	2.74793e-05	244562	TRUE	2.63613e-05	0.00298531	23.1635	42.2042	22.3955
rs6596989	G	A	G	A	-0.0852001	-0.0125196	0.660013	0.7117	3629455	0.149942	0.00869576	244562	GCST90027603	6	3629689	0.0179529	2.08e-06	7738	0.0029029	7738	8.47572e-06	244562	TRUE	9.97181e-06	0.0032578	25.2847	42.2042	22.5222
rs6967058	C	T	C	T	-0.141853	-0.0152556	0.909252	0.91309	144516384	0.194115	0.0117486	244562	GCST90027603	7	144213477	0.03206	9.66e-06	7738	0.00252427	7738	6.8944e-06	244562	TRUE	3.67883e-05	0.00332069	25.7744	42.2042	19.5772
rs7228238	T	C	T	C	-0.0747709	0.0053586	0.415472	0.3712	2641315	0.51432	0.00821713	244562	GCST90027603	18	2641314	0.0166316	6.93e-06	7738	0.00260584	7738	1.73891e-06	244562	TRUE	1.63355e-05	0.00271545	21.0639	42.2042	20.2114
rs73001914	G	A	G	A	-0.102206	-0.0134155	0.182174	0.183	2543925	0.179442	0.00999311	244562	GCST90027603	3	2585609	0.0217496	2.61e-06	7738	0.0028464	7738	7.36926e-06	244562	TRUE	1.13843e-05	0.00311265	24.1546	42.2042	22.0826
rs10951836	G	A	G	A	0.078213	0.00704782	0.352364	0.3865	45847235	0.404424	0.0084532	244562	GCST90027604	7	45886834	0.0176769	9.66e-06	7738	0.00252425	7738	2.84237e-06	244562	TRUE	2.57491e-05	0.00279197	21.6591	42.2042	19.577
rs11141287	T	C	T	C	0.0758855	0.00241098	0.444959	0.456	86173641	0.754001	0.00769376	244562	GCST90027604	9	88788556	0.0166833	5.4e-06	7738	0.00266733	7738	4.01536e-07	244562	TRUE	9.81687e-06	0.00284441	22.0671	42.2042	20.6897
rs12725757	T	A	T	A	0.0778646	-0.00144762	0.351997	0.3599	88175851	0.859339	0.00816869	244562	GCST90027604	1	88641534	0.0170332	4.85e-06	7738	0.00269401	7738	1.28416e-07	244562	TRUE	7.91843e-06	0.00276583	21.4558	42.2042	20.8972
rs13088151	G	A	G	A	-0.0896934	-0.00316274	0.228659	0.2515	3007836	0.757876	0.0102596	244562	GCST90027604	3	3049520	0.020243	9.39e-06	7738	0.00253136	7738	3.8858e-07	244562	TRUE	1.66021e-05	0.00283783	22.0159	42.2042	19.6323
rs1423084	G	A	G	A	-0.0915073	-0.000273607	0.787237	0.8098	26550050	0.97653	0.00930018	244562	GCST90027604	16	26561371	0.0202815	6.43e-06	7738	0.00262454	7738	3.53904e-09	244562	TRUE	9.21689e-06	0.00280507	21.761	42.2042	20.3569
rs17866154	C	G	C	G	-0.133938	-0.015139	0.102088	0.1288	127241648	0.300971	0.0146362	244562	GCST90027604	7	126881702	0.0271446	8.05e-07	7738	0.00313733	7738	4.37472e-06	244562	TRUE	2.95326e-06	0.00328887	25.5266	42.2042	24.3467
rs1915542	T	A	T	A	0.085412	0.00679457	0.673225	0.7045	118593194	0.472014	0.00944732	244562	GCST90027604	8	119605433	0.0177628	1.52e-06	7738	0.0029799	7738	2.11505e-06	244562	TRUE	4.11277e-06	0.00320979	24.9109	42.2042	23.1214
rs35006616	A	G	A	G	0.0803806	0.0106984	0.467885	0.4765	16029003	0.165239	0.00770964	244562	GCST90027604	7	16068628	0.0164359	1.01e-06	7738	0.00308218	7738	7.87373e-06	244562	TRUE	4.89507e-06	0.00321719	24.9685	42.2042	23.9175
rs367274	T	C	T	C	0.0793277	0.0039637	0.453617	0.4734	89912468	0.613266	0.00784244	244562	GCST90027604	6	90622187	0.0165815	1.72e-06	7738	0.00294987	7738	1.04451e-06	244562	TRUE	3.85444e-06	0.00311937	24.2069	42.2042	22.8877
rs61156349	A	T	A	T	0.0898115	0.000727742	0.206393	0.2607	6680753	0.930542	0.00834921	244562	GCST90027604	2	6820885	0.0201328	8.16e-06	7738	0.0025658	7738	3.10655e-08	244562	TRUE	1.21649e-05	0.00264237	20.4956	42.2042	19.9001
rs62522935	C	T	C	T	0.116933	-0.0074213	0.124382	0.1155	93686392	0.536747	0.0120136	244562	GCST90027604	8	94698620	0.0251395	3.3e-06	7738	0.00278889	7738	1.56036e-06	244562	TRUE	7.86168e-06	0.00297835	23.1094	42.2042	21.6352
rs71507551	G	A	G	A	-0.141788	-0.0180268	0.0742318	0.06135	118466943	0.285639	0.0168832	244562	GCST90027604	9	121229221	0.0318225	8.37e-06	7738	0.00255965	7738	4.66167e-06	244562	TRUE	2.69707e-05	0.00276313	21.4348	42.2042	19.8523
rs78769049	T	C	T	C	-0.149104	0.0092755	0.0931358	0.09918	113726955	0.445717	0.0121634	244562	GCST90027604	3	113445802	0.0300847	7.19e-07	7738	0.00316515	7738	2.37782e-06	244562	TRUE	2.10413e-06	0.0037555	29.162	42.2042	24.5633
rs802718	A	G	A	G	0.128723	0.0131975	0.91036	0.8998	127968366	0.212567	0.0105873	244562	GCST90027604	6	128289511	0.0286956	7.26e-06	7738	0.0025944	7738	6.35364e-06	244562	TRUE	2.71612e-05	0.00270432	20.9773	42.2042	20.1225
rs9300960	T	C	T	C	-0.110748	-0.0086683	0.161616	0.1616	104694148	0.517305	0.0133872	244562	GCST90027604	13	105346499	0.0240566	4.15e-06	7738	0.00273211	7738	1.71435e-06	244562	TRUE	1.00179e-05	0.00332376	25.7983	42.2042	21.1935
rs10017115	C	T	C	T	0.104115	0.00619569	0.590678	0.5573	180669679	0.419337	0.007672	244562	GCST90027605	4	181590832	0.0230282	6.15e-06	7738	0.00263539	7738	2.66671e-06	244562	TRUE	1.6496e-05	0.0052417	40.7635	42.2042	20.4412
rs11884645	A	G	A	G	0.1296	-0.00313016	0.178891	0.2137	32895706	0.736789	0.00931294	244562	GCST90027605	2	33120773	0.0292266	9.24e-06	7738	0.00253533	7738	4.61927e-07	244562	TRUE	1.67113e-05	0.00493434	38.3614	42.2042	19.6632
rs16855891	A	G	A	G	0.22891	-0.0156982	0.0504159	0.06339	216307661	0.309588	0.0154497	244562	GCST90027605	2	217172384	0.0508879	6.85e-06	7738	0.00260885	7738	4.22157e-06	244562	TRUE	2.15016e-05	0.00501719	39.0087	42.2042	20.2349
rs3116216	C	T	C	T	0.195371	-0.00155968	0.0710938	0.09202	232226821	0.931479	0.0181392	244562	GCST90027605	2	233091531	0.0440862	9.35e-06	7738	0.0025322	7738	3.02309e-08	244562	TRUE	1.3869e-05	0.00504143	39.1981	42.2042	19.6388
rs34386657	T	C	T	C	0.229411	-0.0179286	0.0526102	0.05521	84181758	0.305614	0.0175004	244562	GCST90027605	11	83892801	0.0507949	6.29e-06	7738	0.00262983	7738	4.29151e-06	244562	TRUE	1.99879e-05	0.00524635	40.7998	42.2042	20.398
rs35531472	T	C	T	C	-0.161366	-0.0168799	0.107296	0.09918	11145915	0.132073	0.0112086	244562	GCST90027605	17	11049232	0.0364965	9.81e-06	7738	0.00252063	7738	9.27358e-06	244562	TRUE	4.36417e-05	0.00498821	38.7823	42.2042	19.5489
rs56059900	A	G	A	G	0.245734	0.0227869	0.0657438	0.06339	49873142	0.353328	0.0245508	244562	GCST90027605	8	50785702	0.0455545	6.88e-08	7738	0.00374732	7738	3.52251e-06	244562	TRUE	2.6785e-07	0.00741791	57.8138	42.2042	29.0983
rs62571693	C	T	C	T	-0.131848	0.00306569	0.181501	0.2331	117882819	0.759716	0.0100234	244562	GCST90027605	9	120645097	0.0289556	5.28e-06	7738	0.00267303	7738	3.82509e-07	244562	TRUE	9.54351e-06	0.00516505	40.1643	42.2042	20.7339
rs7029396	G	C	G	C	0.129526	-0.00852484	0.184267	0.1892	130263971	0.374608	0.0096014	244562	GCST90027605	9	133026250	0.0288862	7.33e-06	7738	0.00259232	7738	3.22342e-06	244562	TRUE	2.07115e-05	0.00504359	39.215	42.2042	20.1063
rs72697193	T	C	T	C	0.170761	-0.0268323	0.114898	0.1258	160511772	0.0516179	0.0137863	244562	GCST90027605	4	161432924	0.0360083	2.11e-06	7738	0.00289864	7738	1.54893e-05	244562	TRUE	1.52079e-05	0.0059308	46.1544	42.2042	22.4891
rs72958820	T	C	T	C	0.260292	0.00104998	0.0540698	0.06953	74583629	0.947999	0.0160991	244562	GCST90027605	6	75293345	0.0508447	3.07e-07	7738	0.00337633	7738	1.7393e-08	244562	TRUE	5.01653e-07	0.00693051	53.9886	42.2042	26.2078
rs75209389	T	G	T	G	0.131907	0.0134169	0.177712	0.1687	7443866	0.185407	0.0101314	244562	GCST90027605	4	7445593	0.0298337	9.81e-06	7738	0.00252063	7738	7.17096e-06	244562	TRUE	3.80331e-05	0.00508518	39.54	42.2042	19.5489
rs7623244	C	A	C	A	0.132253	0.00212778	0.186152	0.1871	125736778	0.85287	0.0114731	244562	GCST90027605	3	125455621	0.0297889	9.01e-06	7738	0.00254144	7738	1.40639e-07	244562	TRUE	1.44784e-05	0.00529971	41.217	42.2042	19.7107
rs7859760	G	T	G	T	0.100406	-0.00151182	0.517931	0.5389	115363462	0.845557	0.00776126	244562	GCST90027605	9	118125741	0.0223525	7.06e-06	7738	0.00260147	7738	1.55149e-07	244562	TRUE	1.15333e-05	0.0050342	39.1416	42.2042	20.1775
rs971716	C	T	C	T	0.103798	-6.42e-08	0.596692	0.6094	17802755	0.999993	0.00732015	244562	GCST90027605	5	17802864	0.0229367	6.03e-06	7738	0.00264029	7738	3.14518e-16	244562	TRUE	8.45814e-06	0.00518555	40.3245	42.2042	20.4793
rs12440220	G	A	G	A	-0.166608	-0.01024	0.40746	0.4008	45655879	0.18905	0.00779659	244562	GCST90027606	15	45948077	0.0366815	5.57e-06	7738	0.00265965	7738	7.05346e-06	244562	TRUE	2.23913e-05	0.0134037	105.1	42.2042	20.6299
rs1555643	A	G	A	G	0.208976	-0.0200121	0.173527	0.1585	14951940	0.0404753	0.00976741	244562	GCST90027606	6	14952171	0.0456846	4.78e-06	7738	0.00269751	7738	1.71646e-05	244562	TRUE	3.43409e-05	0.0125262	98.1317	42.2042	20.9244
rs1589199	G	A	G	A	-0.303254	0.00872173	0.0833208	0.08589	27336345	0.526035	0.0137551	244562	GCST90027606	18	24916309	0.0646742	2.75e-06	7738	0.00283401	7738	1.64395e-06	244562	TRUE	6.69992e-06	0.014048	110.224	42.2042	21.9862
rs2145794	A	T	A	T	0.221571	0.00233235	0.824855	0.8129	34333366	0.805755	0.00948472	244562	GCST90027606	11	34354913	0.0498146	8.67e-06	7738	0.00255086	7738	2.47259e-07	244562	TRUE	1.46428e-05	0.0141851	111.315	42.2042	19.7839
rs4309681	A	G	A	G	0.205271	0.00172785	0.176173	0.1738	148545075	0.868432	0.0104307	244562	GCST90027606	3	148262862	0.0460954	8.46e-06	7738	0.00255689	7738	1.12202e-07	244562	TRUE	1.34151e-05	0.012231	95.7903	42.2042	19.8308
rs4670011	C	T	C	T	-0.174663	-0.0111842	0.306786	0.3589	14626696	0.156722	0.00789743	244562	GCST90027606	2	14766820	0.0392458	8.57e-06	7738	0.00255381	7738	8.20068e-06	244562	TRUE	3.60221e-05	0.0129758	101.701	42.2042	19.8069
rs72829142	G	A	G	A	0.348734	-0.010751	0.0601282	0.06033	148861342	0.487864	0.0154978	244562	GCST90027606	5	148240905	0.0749867	3.31e-06	7738	0.00278799	7738	1.96775e-06	244562	TRUE	8.39428e-06	0.0137457	107.818	42.2042	21.6282
rs7303969	T	C	T	C	-0.211976	-0.00161044	0.832051	0.8047	132588104	0.861206	0.00921098	244562	GCST90027606	12	133164690	0.0462092	4.49e-06	7738	0.00271282	7738	1.24995e-07	244562	TRUE	7.34309e-06	0.0125583	98.3866	42.2042	21.0434
rs7806452	G	A	G	A	0.288692	0.0265759	0.102024	0.09714	75558317	0.0612562	0.0141992	244562	GCST90027606	7	75187621	0.0626113	4.01e-06	7738	0.00274066	7738	1.43237e-05	244562	TRUE	2.55887e-05	0.015271	119.968	42.2042	21.26
rs9933327	G	A	G	A	0.194255	0.0115009	0.305774	0.3589	17787346	0.151757	0.00802377	244562	GCST90027606	16	17881203	0.0414638	2.8e-06	7738	0.00282917	7738	8.40073e-06	244562	TRUE	1.30596e-05	0.0160205	125.952	42.2042	21.9486
rs10448112	G	A	G	A	0.0915049	-0.00501697	0.204444	0.2086	5623068	0.597269	0.00949587	244562	GCST90027607	8	5480590	0.0206659	9.52e-06	7738	0.00252793	7738	1.14137e-06	244562	TRUE	2.00093e-05	0.00272373	21.1283	42.2042	19.6056
rs10951564	A	G	A	G	0.076022	0.00558394	0.472108	0.4458	38634990	0.478748	0.00788338	244562	GCST90027607	7	38674590	0.0163369	3.27e-06	7738	0.00279132	7738	2.05149e-06	244562	TRUE	8.3874e-06	0.00288068	22.3493	42.2042	21.6541
rs1447470	A	G	A	G	0.0937521	-0.0126142	0.735812	0.6881	112825748	0.150896	0.00878198	244562	GCST90027607	11	112696471	0.0197163	1.98e-06	7738	0.00291425	7738	8.43618e-06	244562	TRUE	9.53256e-06	0.00341721	26.5262	42.2042	22.6106
rs17790609	C	T	C	T	0.135454	0.0256698	0.0808749	0.06135	73953751	0.168732	0.0186515	244562	GCST90027607	18	71620986	0.0301332	6.95e-06	7738	0.00260522	7738	7.74517e-06	244562	TRUE	2.88273e-05	0.00272773	21.1595	42.2042	20.2066
rs2481967	G	T	G	T	0.0926418	-0.0165039	0.809301	0.8221	27967446	0.123135	0.0107047	244562	GCST90027607	13	28541583	0.0208963	9.28e-06	7738	0.00253429	7738	9.71934e-06	244562	TRUE	4.2613e-05	0.00264913	20.5481	42.2042	19.6551
rs4791333	G	A	G	A	-0.110765	0.0203584	0.871297	0.8742	9106278	0.165641	0.0146849	244562	GCST90027607	17	9009595	0.0242762	5.05e-06	7738	0.00268386	7738	7.85878e-06	244562	TRUE	2.16492e-05	0.00275163	21.3453	42.2042	20.8182
rs72784665	T	G	T	G	0.157671	0.020064	0.0683811	0.08998	8145494	0.24483	0.017252	244562	GCST90027607	10	8187457	0.0348681	6.13e-06	7738	0.00263624	7738	5.53058e-06	244562	TRUE	2.1744e-05	0.00316744	24.5812	42.2042	20.4478
rs75789763	A	G	A	G	-0.167187	0.010831	0.0562994	0.02556	129482714	0.573304	0.0192314	244562	GCST90027607	4	130403869	0.0369155	5.93e-06	7738	0.00264436	7738	1.29696e-06	244562	TRUE	1.31211e-05	0.00297011	23.0452	42.2042	20.511
rs1686648	A	G	A	G	-0.0931009	0.00223167	0.793975	0.8047	59525559	0.815355	0.00955651	244562	GCST90027608	13	60099693	0.020743	7.18e-06	7738	0.00259728	7738	2.22985e-07	244562	TRUE	1.20946e-05	0.00283573	21.9996	42.2042	20.1449
rs4074922	G	C	G	C	-0.108992	0.00377821	0.197105	0.2178	130949206	0.755064	0.0121108	244562	GCST90027608	12	131433751	0.0245035	8.67e-06	7738	0.00255098	7738	3.97958e-07	244562	TRUE	1.5425e-05	0.00375989	29.1963	42.2042	19.7849
rs55794976	T	C	T	C	-0.169662	-0.0149705	0.0635357	0.0593	88595572	0.338355	0.0156363	244562	GCST90027608	16	88661980	0.0350678	1.31e-06	7738	0.00301664	7738	3.74816e-06	244562	TRUE	4.36868e-06	0.00342538	26.5898	42.2042	23.4073
rs6503292	G	A	G	A	-0.0827317	0.00341439	0.629819	0.637	10210028	0.661773	0.00780492	244562	GCST90027608	17	10113345	0.0177716	3.24e-06	7738	0.00279357	7738	7.82535e-07	244562	TRUE	6.65839e-06	0.00319157	24.769	42.2042	21.6716
rs662934	G	A	G	A	0.101673	-0.013591	0.777175	0.7536	792866	0.17042	0.00991425	244562	GCST90027608	20	773509	0.0221143	4.27e-06	7738	0.00272498	7738	7.68413e-06	244562	TRUE	1.83394e-05	0.00358034	27.797	42.2042	21.138
rs8033436	A	G	A	G	0.0784407	-0.0004102	0.477528	0.5143	90229910	0.957437	0.00768595	244562	GCST90027608	15	90773142	0.017048	4.2e-06	7738	0.00272918	7738	1.16469e-08	244562	TRUE	6.23134e-06	0.00307026	23.8247	42.2042	21.1707
rs9463067	T	C	T	C	-0.079069	-0.00340416	0.380643	0.4335	12728193	0.659227	0.00771952	244562	GCST90027608	6	12728425	0.0173385	5.11e-06	7738	0.00268106	7738	7.95158e-07	244562	TRUE	1.03204e-05	0.00294782	22.8718	42.2042	20.7965
rs11259346	T	C	T	C	0.0821155	-0.00533415	0.325841	0.3057	14796248	0.514942	0.00819174	244562	GCST90027609	10	14838247	0.0175884	3.03e-06	7738	0.0028097	7738	1.73377e-06	244562	TRUE	7.45954e-06	0.00296243	22.9855	42.2042	21.797
rs117176738	G	A	G	A	-0.160576	-0.00138299	0.0555993	0.05726	72628685	0.93888	0.0180364	244562	GCST90027609	11	72339729	0.0358702	7.58e-06	7738	0.00258377	7738	2.4041e-08	244562	TRUE	1.12408e-05	0.0027078	21.0044	42.2042	20.0398
rs12035670	T	C	T	C	-0.0818521	-0.00167532	0.332632	0.3763	52066962	0.832368	0.00791494	244562	GCST90027609	1	52532634	0.0177228	3.87e-06	7738	0.00274968	7738	1.83195e-07	244562	TRUE	6.55429e-06	0.00297453	23.0797	42.2042	21.3302
rs16830066	A	G	A	G	0.122475	-0.00191618	0.101692	0.1309	200220092	0.86813	0.0115409	244562	GCST90027609	1	200189220	0.027157	6.49e-06	7738	0.00262225	7738	1.12722e-07	244562	TRUE	1.03891e-05	0.00274055	21.2591	42.2042	20.3391
rs3113463	T	G	T	G	0.0875069	-0.00794851	0.507096	0.4305	149292264	0.318234	0.00796369	244562	GCST90027609	4	150213416	0.0166185	1.4e-07	7738	0.00357134	7738	4.07338e-06	244562	TRUE	5.55451e-07	0.00382796	29.7269	42.2042	27.7269
rs4962365	C	T	C	T	0.158259	-0.00112899	0.0620419	0.05215	126786956	0.938498	0.0146322	244562	GCST90027609	10	128475525	0.0344899	4.46e-06	7738	0.00271429	7738	2.4343e-08	244562	TRUE	6.73725e-06	0.00291498	22.6162	42.2042	21.0549
rs74671141	C	G	C	G	-0.122167	0.00881638	0.104316	0.1462	137380	0.459743	0.0119258	244562	GCST90027609	3	179063	0.0267473	4.94e-06	7738	0.00268944	7738	2.2347e-06	244562	TRUE	1.27042e-05	0.00278897	21.6358	42.2042	20.8616
rs8079105	T	C	T	C	0.0793471	-0.00952521	0.50919	0.5419	54889042	0.216596	0.00770879	244562	GCST90027609	17	52966403	0.0167696	2.23e-06	7738	0.00288566	7738	6.24294e-06	244562	TRUE	9.01228e-06	0.00314692	24.4214	42.2042	22.3881
rs8097750	A	G	A	G	0.10297	0.0090144	0.144967	0.138	50672241	0.35769	0.00980065	244562	GCST90027609	18	48198611	0.0230428	7.87e-06	7738	0.00257463	7738	3.45921e-06	244562	TRUE	2.27149e-05	0.00262847	20.3875	42.2042	19.9688
rs12466926	A	G	A	G	-0.0991623	0.00538056	0.255776	0.2577	21996593	0.565893	0.00937199	244562	GCST90027610	2	22219465	0.0207513	1.77e-06	7738	0.00294311	7738	1.34774e-06	244562	TRUE	4.1917e-06	0.00374358	29.0691	42.2042	22.8351
rs4739729	A	G	A	G	-0.0924285	-0.010605	0.353332	0.3415	80236951	0.193794	0.00816123	244562	GCST90027610	8	81149186	0.019214	1.51e-06	7738	0.00298238	7738	6.90434e-06	244562	TRUE	6.60699e-06	0.00390397	30.3195	42.2042	23.1407
rs6854439	T	C	T	C	0.0789267	-0.0103431	0.481757	0.4847	40201819	0.196569	0.00800929	244562	GCST90027610	4	40203439	0.0178496	9.79e-06	7738	0.00252103	7738	6.81907e-06	244562	TRUE	3.70376e-05	0.00311057	24.1384	42.2042	19.552
rs77945651	C	A	C	A	0.197268	-0.0310805	0.0551304	0.05215	24165217	0.128575	0.0204511	244562	GCST90027610	12	24318151	0.0409065	1.42e-06	7738	0.00299715	7738	9.44392e-06	244562	TRUE	7.49481e-06	0.00405421	31.491	42.2042	23.2557
rs8046267	G	C	G	C	-0.116058	-0.0184851	0.142949	0.136	57843327	0.0827923	0.010656	244562	GCST90027610	16	57877231	0.0258714	7.26e-06	7738	0.00259457	7738	1.23045e-05	244562	TRUE	3.94431e-05	0.00330041	25.6165	42.2042	20.1238
rs9310781	G	C	G	C	-0.0962912	-0.0128131	0.242162	0.2434	25440656	0.177923	0.00951107	244562	GCST90027610	3	25482147	0.0217543	9.59e-06	7738	0.0025262	7738	7.42098e-06	244562	TRUE	3.79e-05	0.00340319	26.4169	42.2042	19.5922
rs9508816	T	A	T	A	-0.0962162	-0.0168411	0.734997	0.6994	30682432	0.0556711	0.00880074	244562	GCST90027610	13	31256569	0.0211864	5.59e-06	7738	0.00265894	7738	1.49731e-05	244562	TRUE	3.5663e-05	0.00360631	27.9994	42.2042	20.6244
rs1041447	T	C	T	C	0.0755324	0.00909076	0.581197	0.5777	40934300	0.251511	0.00792785	244562	GCST90027611	21	42306226	0.0163735	3.97e-06	7738	0.0027433	7738	5.37653e-06	244562	TRUE	1.43348e-05	0.00277734	21.5454	42.2042	21.2806
rs10416031	G	A	G	A	-0.0794591	-0.0221173	0.653782	0.6943	1095152	0.0104268	0.00863504	244562	GCST90027611	19	1095151	0.0168564	2.43e-06	7738	0.00286415	7738	2.68249e-05	244562	TRUE	2.78878e-05	0.00285825	22.1748	42.2042	22.2207
rs11713293	A	C	A	C	0.158361	0.0248497	0.0581419	0.0593	61891988	0.290932	0.0235301	244562	GCST90027611	3	61877662	0.0354328	7.85e-06	7738	0.00257543	7738	4.56043e-06	244562	TRUE	2.51781e-05	0.00274664	21.3065	42.2042	19.9749
rs55724545	C	G	C	G	-0.0854652	-0.00123561	0.244364	0.2403	65681094	0.885884	0.00860966	244562	GCST90027611	3	65666769	0.0191625	8.2e-06	7738	0.00256474	7738	8.4218e-08	244562	TRUE	1.27805e-05	0.00269748	20.9242	42.2042	19.8918
rs72773357	C	T	C	T	-0.103127	-0.0362691	0.157079	0.1493	8460454	0.00149091	0.0114181	244562	GCST90027611	10	8502417	0.0222823	3.69e-06	7738	0.00276126	7738	4.12553e-05	244562	TRUE	6.3845e-05	0.00281631	21.8485	42.2042	21.4203
rs10489050	A	G	A	G	-0.164383	-0.00677095	0.0855044	0.07055	162644573	0.631159	0.0141033	244562	GCST90027612	4	163565725	0.0356172	3.93e-06	7738	0.00274589	7738	9.42477e-07	244562	TRUE	8.29089e-06	0.00422585	32.8299	42.2042	21.3007
rs11215429	C	T	C	T	0.22683	0.00875161	0.0526883	0.04806	115225126	0.572414	0.0155033	244562	GCST90027612	11	115095846	0.04752	1.81e-06	7738	0.00293666	7738	1.30299e-06	244562	TRUE	4.26223e-06	0.00513615	39.9384	42.2042	22.785
rs12487786	C	T	C	T	-0.102677	-0.00975192	0.757846	0.729	64972389	0.261576	0.00868633	244562	GCST90027612	3	64958064	0.0230714	8.57e-06	7738	0.00255371	7738	5.15371e-06	244562	TRUE	2.87785e-05	0.00386945	30.0503	42.2042	19.8061
rs1474383	C	T	C	T	-0.0976871	-0.00936744	0.637558	0.6329	96742448	0.228781	0.00778347	244562	GCST90027612	7	96371760	0.0204011	1.68e-06	7738	0.00295505	7738	5.92254e-06	244562	TRUE	6.76367e-06	0.00441024	34.2688	42.2042	22.9281
rs261555	A	G	A	G	-0.111062	-0.0165204	0.768291	0.7638	95990911	0.0705602	0.00913589	244562	GCST90027612	8	97003139	0.0232431	1.77e-06	7738	0.0029427	7738	1.33705e-05	244562	TRUE	1.15868e-05	0.00439167	34.1238	42.2042	22.8319
rs4260641	G	A	G	A	-0.0893609	-0.00728703	0.591584	0.5941	106100804	0.343223	0.00768823	244562	GCST90027612	5	105436505	0.020056	8.37e-06	7738	0.00255963	7738	3.67334e-06	244562	TRUE	2.45801e-05	0.00385873	29.9668	42.2042	19.8521
rs4645398	C	T	C	T	-0.109342	-0.0151363	0.211335	0.2331	62894331	0.0635477	0.00815823	244562	GCST90027612	6	63604236	0.0244923	8.03e-06	7738	0.00256969	7738	1.40752e-05	244562	TRUE	4.73486e-05	0.00398536	30.9541	42.2042	19.9303
rs4783336	A	C	A	C	-0.221577	-0.0515597	0.931331	0.94479	83215418	0.0191779	0.0220147	244562	GCST90027612	16	83249023	0.0439473	4.61e-07	7738	0.00327524	7738	2.24284e-05	244562	TRUE	5.34241e-06	0.00627978	48.8873	42.2042	25.4206
rs56301029	C	G	C	G	0.0982642	0.00259823	0.314671	0.271	98498829	0.772832	0.00900062	244562	GCST90027612	9	101261111	0.0216897	5.89e-06	7738	0.00264616	7738	3.40742e-07	244562	TRUE	1.04493e-05	0.00416463	32.3523	42.2042	20.525
rs617079	G	C	G	C	-0.188862	-0.00847482	0.0630626	0.0726	150431803	0.577936	0.0152315	244562	GCST90027612	6	150752939	0.0406074	3.3e-06	7738	0.00278837	7738	1.26588e-06	244562	TRUE	7.49148e-06	0.00421504	32.7456	42.2042	21.6311
rs6454985	C	T	C	T	-0.0889841	-0.000647379	0.581833	0.5767	94007926	0.935418	0.00798936	244562	GCST90027612	6	94717644	0.0197122	6.36e-06	7738	0.00262722	7738	2.68477e-08	244562	TRUE	9.51101e-06	0.00385303	29.9224	42.2042	20.3777
rs6473162	T	A	T	A	0.0918697	0.00916436	0.396473	0.4029	79484179	0.290124	0.0086632	244562	GCST90027612	8	80396414	0.0202865	5.94e-06	7738	0.00264402	7738	4.57573e-06	244562	TRUE	1.94449e-05	0.0040391	31.3732	42.2042	20.5083
rs6805759	G	A	G	A	0.0946118	0.0240723	0.527657	0.5429	172175860	0.00172779	0.00768242	244562	GCST90027612	3	171893650	0.0200558	2.39e-06	7738	0.00286845	7738	4.01454e-05	244562	TRUE	4.25129e-05	0.004462	34.6728	42.2042	22.2541
rs836868	T	A	T	A	-0.0986201	0.0121636	0.60273	0.6196	123141126	0.114792	0.00771305	244562	GCST90027612	3	122859973	0.0208141	2.16e-06	7738	0.00289361	7738	1.01691e-05	244562	TRUE	1.15317e-05	0.00465768	36.2004	42.2042	22.45
rs10886367	C	G	C	G	0.083789	-0.0159462	0.60289	0.6094	119020852	0.0458955	0.00798766	244562	GCST90027613	10	120780364	0.016751	5.67e-07	7738	0.00322384	7738	1.6296e-05	244562	TRUE	4.82552e-06	0.00336165	26.0935	42.2042	25.0203
rs11223389	T	C	T	C	0.0951344	-0.0166944	0.217382	0.2035	133204732	0.0972478	0.0100669	244562	GCST90027613	11	133074627	0.0206508	4.09e-06	7738	0.00273587	7738	1.1245e-05	244562	TRUE	2.20638e-05	0.00307949	23.8965	42.2042	21.2227
rs12693170	A	C	A	C	-0.0876407	-0.0142453	0.754084	0.68	178872417	0.086852	0.00831968	244562	GCST90027613	2	179737144	0.0190692	4.31e-06	7738	0.00272299	7738	1.19878e-05	244562	TRUE	2.41314e-05	0.00284871	22.1006	42.2042	21.1226
rs13203297	A	T	A	T	0.0790555	-0.00159781	0.324735	0.3149	73558279	0.847737	0.00832164	244562	GCST90027613	6	74268002	0.0174388	5.81e-06	7738	0.00264949	7738	1.50746e-07	244562	TRUE	9.53778e-06	0.00274093	21.2621	42.2042	20.5509
rs2903147	A	G	A	G	0.0727499	-0.00852389	0.498599	0.5297	61031816	0.267998	0.00769523	244562	GCST90027613	20	59606872	0.0163904	9.06e-06	7738	0.00254018	7738	5.01701e-06	244562	TRUE	2.99414e-05	0.00264625	20.5257	42.2042	19.7009
rs4074922	G	C	G	C	-0.108702	0.00377821	0.200294	0.2178	130949206	0.755064	0.0121108	244562	GCST90027613	12	131433751	0.0238071	4.97e-06	7738	0.00268768	7738	3.97958e-07	244562	TRUE	9.05967e-06	0.00378533	29.3946	42.2042	20.8479
rs4624725	A	G	A	G	0.101275	-0.000299927	0.810342	0.8108	6133594	0.97997	0.0119462	244562	GCST90027613	4	6135321	0.0216038	2.76e-06	7738	0.00283267	7738	2.57743e-09	244562	TRUE	4.05516e-06	0.00315264	24.4659	42.2042	21.9758
rs62485312	A	G	A	G	0.134093	-0.0133338	0.102164	0.08589	5781148	0.426553	0.0167699	244562	GCST90027613	8	5638670	0.0281449	1.89e-06	7738	0.00292566	7738	2.585e-06	244562	TRUE	5.39108e-06	0.00329866	25.6029	42.2042	22.6993
rs72835533	G	A	G	A	-0.0941348	0.0123655	0.197483	0.2669	23730825	0.150399	0.00859836	244562	GCST90027613	6	23731053	0.021039	7.67e-06	7738	0.00258114	7738	8.45675e-06	244562	TRUE	3.30756e-05	0.00280876	21.7898	42.2042	20.0194
rs73335828	A	G	A	G	0.168873	0.00232858	0.0554602	0.04908	74007245	0.879525	0.0153629	244562	GCST90027613	8	74919480	0.0359797	2.68e-06	7738	0.00283958	7738	9.39397e-08	244562	TRUE	4.38965e-06	0.0029878	23.1829	42.2042	22.0295
rs7492664	T	G	T	G	-0.147612	-0.0119759	0.0726264	0.07669	34733139	0.307257	0.0117296	244562	GCST90027613	14	35202345	0.0316442	3.09e-06	7738	0.00280491	7738	4.26245e-06	244562	TRUE	1.02677e-05	0.0029351	22.7728	42.2042	21.7598
rs9463229	T	C	T	C	0.0980088	-0.00396641	0.184748	0.1943	46624889	0.677172	0.00952719	244562	GCST90027613	6	46592626	0.0216752	6.13e-06	7738	0.00263597	7738	7.08728e-07	244562	TRUE	1.20487e-05	0.00289356	22.4495	42.2042	20.4458
rs1428949	T	C	T	C	-0.0779739	-0.00809967	0.433176	0.4724	9947500	0.293243	0.00770638	244562	GCST90027614	5	9947612	0.0166369	2.78e-06	7738	0.00283143	7738	4.51696e-06	244562	TRUE	9.51598e-06	0.00298567	23.1663	42.2042	21.9661
rs34848869	G	C	G	C	-0.162287	0.0113982	0.0629004	0.06748	18801020	0.408871	0.0138012	244562	GCST90027614	9	18801018	0.0354614	4.73e-06	7738	0.00270001	7738	2.78901e-06	244562	TRUE	1.30771e-05	0.00310482	24.0937	42.2042	20.9438
rs35057482	T	C	T	C	-0.137282	0.0181235	0.0887948	0.07669	179459439	0.283331	0.0168926	244562	GCST90027614	2	180324166	0.0294165	3.06e-06	7738	0.00280742	7738	4.70656e-06	244562	TRUE	1.0606e-05	0.00304973	23.6649	42.2042	21.7794
rs4785220	C	T	C	T	0.0782036	0.0182547	0.680021	0.7331	50593467	0.0511658	0.00936097	244562	GCST90027614	16	50627378	0.0172315	5.67e-06	7738	0.00265544	7738	1.55495e-05	244562	TRUE	3.71417e-05	0.00266151	20.6443	42.2042	20.5972
rs62338928	G	A	G	A	-0.087888	0.00507777	0.324931	0.2832	181536002	0.565519	0.00883608	244562	GCST90027614	4	182457155	0.0174997	5.11e-07	7738	0.00324988	7738	1.35033e-06	244562	TRUE	1.29157e-06	0.00338866	26.3038	42.2042	25.2231
rs7108080	A	G	A	G	-0.085927	0.00280906	0.508635	0.4305	59959292	0.727659	0.00806642	244562	GCST90027614	11	59726765	0.0168713	3.52e-07	7738	0.00334189	7738	4.95878e-07	244562	TRUE	7.40961e-07	0.00369062	28.6564	42.2042	25.9395
rs71430764	A	C	A	C	-0.203901	0.059941	0.050561	0.05112	92514209	0.00786991	0.0225546	244562	GCST90027614	14	92980553	0.0423462	1.47e-06	7738	0.00298809	7738	2.8879e-05	244562	TRUE	1.93116e-05	0.00399164	31.0031	42.2042	23.1851
rs73142368	T	G	T	G	-0.0775477	0.00324958	0.328782	0.3579	88748236	0.68496	0.00800973	244562	GCST90027614	3	88797386	0.0174198	8.52e-06	7738	0.00255519	7738	6.73028e-07	244562	TRUE	1.63449e-05	0.00265424	20.5878	42.2042	19.8176
rs7569681	C	T	C	T	-0.131782	-0.0213579	0.086701	0.07055	115336870	0.0916347	0.0126615	244562	GCST90027614	2	116094446	0.0289189	5.19e-06	7738	0.00267712	7738	1.16347e-05	244562	TRUE	2.8031e-05	0.00275029	21.335	42.2042	20.7658
rs79149938	G	A	G	A	-0.154991	-0.046876	0.0653077	0.04601	90791882	0.079704	0.0267495	244562	GCST90027614	11	90525050	0.0342404	6e-06	7738	0.00264162	7738	1.25568e-05	244562	TRUE	3.36077e-05	0.00293276	22.7545	42.2042	20.4897
rs9582093	A	G	A	G	-0.0717885	0.00808153	0.473701	0.4427	96989455	0.310326	0.00796572	244562	GCST90027614	13	97641709	0.0162011	9.38e-06	7738	0.00253165	7738	4.20872e-06	244562	TRUE	2.87856e-05	0.00256967	19.9301	42.2042	19.6345
rs11058744	T	G	T	G	-0.153543	0.00775587	0.0707436	0.09305	126607334	0.667758	0.0180694	244562	GCST90027615	12	127091880	0.0321109	1.74e-06	7738	0.00294684	7738	7.53335e-07	244562	TRUE	3.65663e-06	0.00309965	24.0535	42.2042	22.8642
rs11168050	A	G	A	G	0.141163	0.0127991	0.0793935	0.09816	148551960	0.297395	0.0122828	244562	GCST90027615	5	147931523	0.0302311	3.02e-06	7738	0.00281057	7738	4.43995e-06	244562	TRUE	1.02223e-05	0.00291293	22.6003	42.2042	21.8039
rs12457526	T	G	T	G	-0.0787255	-0.019356	0.382444	0.3599	23436829	0.0139817	0.00787555	244562	GCST90027615	18	21016793	0.0167447	2.58e-06	7738	0.00284918	7738	2.46987e-05	244562	TRUE	2.71613e-05	0.00292755	22.7141	42.2042	22.1043
rs1428949	T	C	T	C	-0.0770872	-0.00809967	0.433176	0.4724	9947500	0.293243	0.00770638	244562	GCST90027615	5	9947612	0.0166082	3.46e-06	7738	0.00277712	7738	4.51696e-06	244562	TRUE	1.16861e-05	0.00291815	22.6409	42.2042	21.5437
rs143920868	T	C	T	C	-0.151033	0.0109054	0.0872329	0.08384	52815758	0.352768	0.0117359	244562	GCST90027615	1	53281430	0.0310716	1.17e-06	7738	0.00304492	7738	3.53072e-06	244562	TRUE	3.83249e-06	0.00363257	28.204	42.2042	23.6274
rs1920088	G	A	G	A	-0.111932	0.00791585	0.875328	0.909	62184269	0.569767	0.0139267	244562	GCST90027615	12	62578050	0.0247536	6.13e-06	7738	0.00263614	7738	1.32103e-06	244562	TRUE	1.36001e-05	0.0027345	21.2121	42.2042	20.4471
rs41359044	T	C	T	C	-0.161094	0.00584128	0.0527914	0.07975	33757890	0.723611	0.0165177	244562	GCST90027615	13	34332027	0.0362125	8.64e-06	7738	0.00255162	7738	5.11363e-07	244562	TRUE	1.59039e-05	0.00259536	20.1299	42.2042	19.7898
rs5766546	A	G	A	G	-0.106	-0.0162633	0.140928	0.1472	45210556	0.0662827	0.00885556	244562	GCST90027615	22	45606437	0.0232727	5.25e-06	7738	0.00267448	7738	1.37909e-05	244562	TRUE	3.17589e-05	0.00272062	21.1042	42.2042	20.7452
rs617024	T	C	T	C	-0.110423	-0.00117147	0.134058	0.1493	77077048	0.915861	0.0110883	244562	GCST90027615	18	74789004	0.0243578	5.81e-06	7738	0.00264956	7738	4.56398e-08	244562	TRUE	8.88875e-06	0.00283094	21.9623	42.2042	20.5515
rs6427759	C	A	C	A	-0.136692	0.000759066	0.9086	0.9182	199181530	0.9519	0.0125838	244562	GCST90027615	1	199150658	0.0289961	2.43e-06	7738	0.00286447	7738	1.48782e-08	244562	TRUE	3.68782e-06	0.00310338	24.0825	42.2042	22.2232
rs6903592	A	T	A	T	-0.0819131	-0.000311068	0.318408	0.3681	70145279	0.969579	0.00815674	244562	GCST90027615	6	70855171	0.0172573	2.07e-06	7738	0.0029039	7738	5.94692e-09	244562	TRUE	3.10116e-06	0.00291236	22.5958	42.2042	22.53
rs7108080	A	G	A	G	-0.0855444	0.00280906	0.508635	0.4305	59959292	0.727659	0.00806642	244562	GCST90027615	11	59726765	0.0168421	3.79e-07	7738	0.00332375	7738	4.95878e-07	244562	TRUE	7.9472e-07	0.00365783	28.4009	42.2042	25.7983
rs76346802	G	A	G	A	-0.128867	0.0140506	0.0931431	0.09611	90990521	0.269222	0.0127171	244562	GCST90027615	11	90723689	0.0280657	4.4e-06	7738	0.0027179	7738	4.99142e-06	244562	TRUE	1.52611e-05	0.00280545	21.764	42.2042	21.083
rs112075774	A	G	A	G	-0.160161	-0.0138749	0.0650248	0.0726	23263670	0.354501	0.0149854	244562	GCST90027616	16	23274991	0.0345293	3.51e-06	7738	0.00277342	7738	3.50538e-06	244562	TRUE	1.07148e-05	0.00311905	24.2045	42.2042	21.5148
rs11626206	T	C	T	C	0.078505	0.0034805	0.679116	0.6258	49113018	0.684301	0.00855999	244562	GCST90027616	14	49579736	0.0173616	6.13e-06	7738	0.00263604	7738	6.76007e-07	244562	TRUE	1.19518e-05	0.00268607	20.8354	42.2042	20.4463
rs117005933	T	C	T	C	-0.169136	-0.00434082	0.0599435	0.06646	112428044	0.743745	0.0132788	244562	GCST90027616	11	112298767	0.0347447	1.13e-06	7738	0.00305387	7738	4.36957e-07	244562	TRUE	2.21476e-06	0.00322402	25.0217	42.2042	23.6971
rs1275053	A	G	A	G	-0.138115	0.0289024	0.901908	0.90798	123704640	0.011645	0.0114568	244562	GCST90027616	11	123575348	0.0275709	5.46e-07	7738	0.00323338	7738	2.60221e-05	244562	TRUE	7.21107e-06	0.00337526	26.1995	42.2042	25.0946
rs12875094	G	A	G	A	0.0751975	0.00117639	0.352359	0.363	92656308	0.88165	0.00790171	244562	GCST90027616	13	93308561	0.0168547	8.14e-06	7738	0.00256645	7738	9.06306e-08	244562	TRUE	1.27497e-05	0.00258081	20.0168	42.2042	19.9051
rs35096174	A	C	A	C	-0.147662	0.00273897	0.0801648	0.06135	144036619	0.874962	0.0174059	244562	GCST90027616	6	144357756	0.031659	3.1e-06	7738	0.00280419	7738	1.0125e-07	244562	TRUE	5.06479e-06	0.00321559	24.9561	42.2042	21.7542
rs4374638	C	T	C	T	0.0775467	0.0125787	0.652742	0.5982	12425965	0.107484	0.00781477	244562	GCST90027616	4	12427589	0.0173157	7.52e-06	7738	0.00258586	7738	1.05937e-05	244562	TRUE	3.70419e-05	0.00272615	21.1472	42.2042	20.0561
rs7796539	T	C	T	C	0.104855	0.00834917	0.152561	0.1912	28468010	0.425458	0.0104759	244562	GCST90027616	7	28507628	0.0230006	5.15e-06	7738	0.00267928	7738	2.59727e-06	244562	TRUE	1.38314e-05	0.00284289	22.0553	42.2042	20.7826
rs79676117	C	A	C	A	-0.211348	-0.0117346	0.0501897	0.04499	51799422	0.48184	0.016684	244562	GCST90027616	20	50415961	0.0370389	1.16e-08	7738	0.00419121	7738	2.0228e-06	244562	TRUE	4.00779e-08	0.00425871	33.0863	42.2042	32.5597
rs928495	T	C	T	C	0.145157	-0.00197805	0.097302	0.091	47786227	0.866975	0.0118091	244562	GCST90027616	20	46414971	0.0276882	1.58e-07	7738	0.00354022	7738	1.14724e-07	244562	TRUE	2.91512e-07	0.00370144	28.7407	42.2042	27.4844
rs12678419	G	C	G	C	-0.108148	-0.0151577	0.15879	0.1145	103245269	0.164666	0.0109084	244562	GCST90027617	8	104257497	0.0224845	1.51e-06	7738	0.00298165	7738	7.89512e-06	244562	TRUE	7.13511e-06	0.0031246	24.2477	42.2042	23.1351
rs1455275	T	C	T	C	0.121888	-0.0127909	0.109073	0.1268	60807251	0.31067	0.0126166	244562	GCST90027617	4	61672969	0.0264037	3.91e-06	7738	0.00274714	7738	4.20274e-06	244562	TRUE	1.27057e-05	0.00288743	22.4018	42.2042	21.3104
rs1515603	A	G	A	G	0.14961	-0.00870181	0.0680756	0.1104	174538101	0.409725	0.0105556	244562	GCST90027617	3	174255891	0.0324188	3.93e-06	7738	0.00274547	7738	2.77885e-06	244562	TRUE	1.09808e-05	0.00284003	22.0331	42.2042	21.2974
rs3998109	A	G	A	G	0.0808375	-0.00229841	0.349748	0.364	33825983	0.777891	0.00814841	244562	GCST90027617	6	33793760	0.0172506	2.79e-06	7738	0.00283054	7738	3.2533e-07	244562	TRUE	5.07149e-06	0.0029723	23.0623	42.2042	21.9592
rs4860463	G	A	G	A	-0.128433	-0.00423325	0.88351	0.865	62492447	0.769146	0.0144237	244562	GCST90027617	4	63358165	0.0273357	2.62e-06	7738	0.00284537	7738	3.52215e-07	244562	TRUE	4.83338e-06	0.00339534	26.3558	42.2042	22.0746
rs6448117	G	T	G	T	-0.188448	-0.023473	0.0525441	0.04294	22077590	0.436096	0.0301399	244562	GCST90027617	4	22079213	0.037445	4.84e-07	7738	0.00326332	7738	2.48009e-06	244562	TRUE	1.46811e-06	0.00353587	27.4505	42.2042	25.3277
rs7128538	A	G	A	G	0.0772024	-0.00380505	0.469966	0.4387	46159142	0.62342	0.00774945	244562	GCST90027617	11	46180693	0.0164376	2.64e-06	7738	0.00284336	7738	9.8581e-07	244562	TRUE	5.74208e-06	0.00296935	23.0393	42.2042	22.0589
rs80233470	T	C	T	C	0.126112	0.00826932	0.114158	0.1125	61107847	0.675201	0.0197349	244562	GCST90027617	11	60875319	0.0271438	3.38e-06	7738	0.00278256	7738	7.17935e-07	244562	TRUE	6.84328e-06	0.00321666	24.9644	42.2042	21.586
rs9608542	C	T	C	T	0.163644	0.0262566	0.062468	0.09714	26934596	0.0473576	0.0132403	244562	GCST90027617	22	27330559	0.0370421	9.97e-06	7738	0.00251651	7738	1.60802e-05	244562	TRUE	6.32895e-05	0.00313671	24.3419	42.2042	19.5168
rs111686525	T	A	T	A	-0.190749	0.00724799	0.0537814	0.05419	71523826	0.688844	0.0181008	244562	GCST90027618	13	72097958	0.0407554	2.86e-06	7738	0.00282364	7738	6.55625e-07	244562	TRUE	5.74809e-06	0.00370321	28.7545	42.2042	21.9056
rs12114032	G	A	G	A	-0.0706482	-0.00622951	0.550142	0.5511	20989821	0.427809	0.00785615	244562	GCST90027618	8	20847332	0.0159492	9.44e-06	7738	0.00252993	7738	2.571e-06	244562	TRUE	2.44107e-05	0.00247049	19.159	42.2042	19.6211
rs17495513	T	G	T	G	-0.0934359	0.0253876	0.169129	0.184	64820885	0.0236097	0.0112165	244562	GCST90027618	16	64854788	0.0210084	8.69e-06	7738	0.00255045	7738	2.09477e-05	244562	TRUE	6.88053e-05	0.00245363	19.028	42.2042	19.7807
rs261316	T	C	T	C	-0.0743683	0.00164861	0.605971	0.5859	58341621	0.829523	0.00765679	244562	GCST90027618	15	58633820	0.0162574	4.78e-06	7738	0.00269764	7738	1.89564e-07	244562	TRUE	8.05415e-06	0.00264111	20.4857	42.2042	20.9254
rs2908645	G	A	G	A	-0.0724382	-0.00234085	0.481448	0.498	4982909	0.761279	0.00770519	244562	GCST90027618	16	5032910	0.0162646	8.44e-06	7738	0.00255753	7738	3.77394e-07	244562	TRUE	1.49394e-05	0.00262003	20.3218	42.2042	19.8357
rs337641	A	G	A	G	0.0889729	-0.0049258	0.763879	0.7638	38610181	0.61727	0.00985706	244562	GCST90027618	4	38611802	0.0184866	1.49e-06	7738	0.00298529	7738	1.02111e-06	244562	TRUE	3.34661e-06	0.00285565	22.1546	42.2042	23.1634
rs4797270	C	T	C	T	0.0753597	-0.00237626	0.511347	0.5092	6928947	0.759352	0.00775714	244562	GCST90027618	18	6928946	0.0170083	9.39e-06	7738	0.00253128	7738	3.83706e-07	244562	TRUE	1.65821e-05	0.00283808	22.0179	42.2042	19.6316
rs61889187	A	T	A	T	0.110995	-0.00174062	0.155585	0.1411	32348057	0.906462	0.0148135	244562	GCST90027618	11	32369603	0.0218243	3.66e-07	7738	0.00333242	7738	5.64557e-08	244562	TRUE	6.24148e-07	0.00323713	25.1238	42.2042	25.8658
rs6733157	T	C	T	C	-0.0793214	-0.00702261	0.498335	0.5194	37733225	0.365709	0.00776373	244562	GCST90027618	2	37960368	0.0164506	1.42e-06	7738	0.00299638	7738	3.34556e-06	244562	TRUE	4.51298e-06	0.00314591	24.4135	42.2042	23.2497
rs72703328	T	G	T	G	0.107112	-0.021596	0.136402	0.1554	167484587	0.0269457	0.00976177	244562	GCST90027618	4	168405738	0.0238943	7.37e-06	7738	0.00259086	7738	2.00122e-05	244562	TRUE	5.72342e-05	0.00270295	20.9667	42.2042	20.095
rs73218301	C	T	C	T	-0.0956164	-0.00483443	0.191271	0.2004	94482127	0.609092	0.00945388	244562	GCST90027618	12	94875903	0.0207613	4.11e-06	7738	0.00273432	7738	1.06926e-06	244562	TRUE	8.89358e-06	0.00282844	21.9429	42.2042	21.2107
rs77200599	G	A	G	A	0.116807	-0.00248201	0.102372	0.08896	103022867	0.838464	0.0121752	244562	GCST90027618	7	102663314	0.0264263	9.87e-06	7738	0.00251914	7738	1.69931e-07	244562	TRUE	1.60317e-05	0.00250753	19.447	42.2042	19.5373
rs2404677	C	T	C	T	-0.139313	-0.0102354	0.785662	0.819	208632538	0.254213	0.00897703	244562	GCST90027619	1	208805883	0.0286852	1.19e-06	7738	0.00303969	7738	5.31565e-06	244562	TRUE	4.6673e-06	0.00653654	50.8994	42.2042	23.5867
rs2457055	A	G	A	G	-0.12878	0.0047476	0.307426	0.3425	47637355	0.599931	0.00905167	244562	GCST90027619	1	48103027	0.0256964	5.4e-07	7738	0.00323615	7738	1.12488e-06	244562	TRUE	1.30263e-06	0.0070621	55.0209	42.2042	25.1161
rs2619296	C	A	C	A	-0.11477	0.00409264	0.596267	0.6053	102150899	0.602456	0.00785729	244562	GCST90027619	3	101869743	0.0251641	5.09e-06	7738	0.00268171	7738	1.10937e-06	244562	TRUE	1.09808e-05	0.00634193	49.3743	42.2042	20.8015
rs34467156	T	C	T	C	-0.216991	0.00129963	0.0715044	0.07055	8845749	0.941454	0.0176959	244562	GCST90027619	3	8887433	0.047385	4.66e-06	7738	0.0027034	7738	2.20551e-08	244562	TRUE	7.00986e-06	0.0062521	48.6706	42.2042	20.9702
[truncated: 2,080 more rows]

## Sheet: Table S4
Table S4 Leave-one-out analysis of the association between gut bacterial traits and asthma
id.exposure	outcome	samplesize	SNP	b	se	p
[truncated: 4,149 more rows]

## Sheet: Table S5
Table S5 Casual effects of MR analysis between identified gut bacterial traits and asthma
[truncated: 122 more rows]

[truncated: 27 more sheets: Table S6, Table S7, Table S8, Table S9, Table S10, Table S11, Table S12, Table S13, Table S14, Table S15 , Table S16, Table S17, Table S18, Table S19, Table S20, Table S21, Table S22, Table S23, Table S24, Table S25 …]
